# Supplementary material
Source: publisher figshare collection journal article supplement (https://acs.figshare.com/ndownloader/files/6878313)
Supplement: Supplementary file 1 [file 6878313]

data_jfig1150
_audit_creation_date              2016-10-04
_audit_creation_method
;
Olex2 1.2
(compiled 2016.09.09 svn.r3337 for OlexSys, GUI svn.r5227)
;
_publ_contact_author_address      
;
Department of Chemistry and Biochemistry, University of California, San Diego
;
_publ_contact_author_email        'jsfig@ucsd.edu'
_publ_contact_author_name         'Joshua S. Figueroa'
_publ_contact_author_phone        ?
_publ_section_references
;
Dolomanov, O.V., Bourhis, L.J., Gildea, R.J, Howard, J.A.K. & Puschmann, H.
 (2009), J. Appl. Cryst. 42, 339-341.

Sheldrick, G.M. (2008). Acta Cryst. A64, 112-122.
;
_chemical_name_common             [CNArMes2]2
_chemical_name_systematic         ?
_chemical_formula_moiety          '2(C4 H10 O), 2(C25 H24 N)'
_chemical_formula_sum             'C58 H68 N2 O2'
_chemical_formula_weight          825.14
_chemical_melting_point           ?
loop_
  _atom_type_symbol
  _atom_type_description
  _atom_type_scat_dispersion_real
  _atom_type_scat_dispersion_imag
  _atom_type_scat_source
 'C' 'C' 0.0033 0.0016 'International Tables Vol C Tables 4.2.6.8 and 6.1.1.4'
 'H' 'H' 0.0000 0.0000 'International Tables Vol C Tables 4.2.6.8 and 6.1.1.4'
 'N' 'N' 0.0061 0.0033 'International Tables Vol C Tables 4.2.6.8 and 6.1.1.4'
 'O' 'O' 0.0106 0.0060 'International Tables Vol C Tables 4.2.6.8 and 6.1.1.4'

_shelx_space_group_comment
;
The symmetry employed for this shelxl refinement is uniquely defined
by the following loop, which should always be used as a source of
symmetry information in preference to the above space-group names.
They are only intended as comments.
;
_space_group_crystal_system       'triclinic'
_space_group_IT_number            2
_space_group_name_H-M_alt         'P -1'
_space_group_name_Hall            '-P 1'
loop_
  _space_group_symop_operation_xyz
 'x, y, z'
 '-x, -y, -z'

_cell_length_a                    12.6957(8)
_cell_length_b                    13.7455(7)
_cell_length_c                    15.3667(9)
_cell_angle_alpha                 104.296(2)
_cell_angle_beta                  90.301(2)
_cell_angle_gamma                 104.170(2)
_cell_volume                      2513.3(3)
_cell_formula_units_Z             2
_cell_measurement_reflns_used     9962
_cell_measurement_temperature     100(2)
_cell_measurement_theta_max       25.36
_cell_measurement_theta_min       2.22
_shelx_estimated_absorpt_T_max    ?
_shelx_estimated_absorpt_T_min    ?
_exptl_absorpt_coefficient_mu     0.065
_exptl_absorpt_correction_T_max   0.7452
_exptl_absorpt_correction_T_min   0.6263
_exptl_absorpt_correction_type    multi-scan
_exptl_absorpt_process_details
;
SADABS-2014/4 (Bruker,2014/4) was used for absorption correction.
wR2(int) was 0.0778 before and 0.0650 after correction.
The Ratio of minimum to maximum transmission is 0.8404.
The \l/2 correction factor is 0.00150.
;
_exptl_absorpt_special_details    ?
_exptl_crystal_colour             colourless
_exptl_crystal_colour_primary     colourless
_exptl_crystal_density_diffrn     1.090
_exptl_crystal_density_meas       ?
_exptl_crystal_density_method     ?
_exptl_crystal_description        block
_exptl_crystal_F_000              892
_exptl_crystal_size_max           0.2
_exptl_crystal_size_mid           0.2
_exptl_crystal_size_min           0.2
_exptl_transmission_factor_max    ?
_exptl_transmission_factor_min    ?
_diffrn_reflns_av_R_equivalents   0.0718
_diffrn_reflns_av_unetI/netI      0.0486
_diffrn_reflns_Laue_measured_fraction_full 0.998
_diffrn_reflns_Laue_measured_fraction_max 0.998
_diffrn_reflns_limit_h_max        15
_diffrn_reflns_limit_h_min        -15
_diffrn_reflns_limit_k_max        16
_diffrn_reflns_limit_k_min        -13
_diffrn_reflns_limit_l_max        18
_diffrn_reflns_limit_l_min        -18
_diffrn_reflns_number             72941
_diffrn_reflns_point_group_measured_fraction_full 0.998
_diffrn_reflns_point_group_measured_fraction_max 0.998
_diffrn_reflns_theta_full         25.358
_diffrn_reflns_theta_max          25.358
_diffrn_reflns_theta_min          2.225
_diffrn_ambient_temperature       100.0
_diffrn_detector_area_resol_mean  ?
_diffrn_measured_fraction_theta_full 0.998
_diffrn_measured_fraction_theta_max 0.998
_diffrn_measurement_device_type   'Bruker Apex-II'
_diffrn_measurement_method        ?
_diffrn_radiation_type            MoK\a
_diffrn_radiation_wavelength      0.71073
_diffrn_source                    ?
_reflns_Friedel_coverage          0.000
_reflns_Friedel_fraction_full     .
_reflns_Friedel_fraction_max      .
_reflns_number_gt                 6478
_reflns_number_total              9209
_reflns_special_details
;
 Reflections were merged by SHELXL according to the crystal
 class for the calculation of statistics and refinement.
 
 _reflns_Friedel_fraction is defined as the number of unique
 Friedel pairs measured divided by the number that would be
 possible theoretically, ignoring centric projections and
 systematic absences.
;
_reflns_threshold_expression      'I > 2\s(I)'
_computing_cell_refinement        ?
_computing_data_collection        ?
_computing_data_reduction         ?
_computing_molecular_graphics     'Olex2 (Dolomanov et al., 2009)'
_computing_publication_material   'Olex2 (Dolomanov et al., 2009)'
_computing_structure_refinement   'XL (Sheldrick, 2008)'
_computing_structure_solution     ?
_refine_diff_density_max          0.288
_refine_diff_density_min          -0.219
_refine_diff_density_rms          0.040
_refine_ls_extinction_coef        .
_refine_ls_extinction_method      none
_refine_ls_goodness_of_fit_ref    1.003
_refine_ls_hydrogen_treatment     constr
_refine_ls_matrix_type            full
_refine_ls_number_parameters      575
_refine_ls_number_reflns          9209
_refine_ls_number_restraints      0
_refine_ls_R_factor_all           0.0774
_refine_ls_R_factor_gt            0.0442
_refine_ls_restrained_S_all       1.003
_refine_ls_shift/su_max           0.000
_refine_ls_shift/su_mean          0.000
_refine_ls_structure_factor_coef  Fsqd
_refine_ls_weighting_details
'w=1/[\s^2^(Fo^2^)+(0.0436P)^2^+1.0295P] where P=(Fo^2^+2Fc^2^)/3'
_refine_ls_weighting_scheme       calc
_refine_ls_wR_factor_gt           0.0958
_refine_ls_wR_factor_ref          0.1095
_refine_special_details           ?
_olex2_refinement_description
;
1. Fixed Uiso
 At 1.2 times of:
  All C(H) groups, All C(H,H) groups
 At 1.5 times of:
  All C(H,H,H) groups
2.a Secondary CH2 refined with riding coordinates:
 C5S(H5SA,H5SB), C7S(H7SA,H7SB), C1S(H1SA,H1SB), C3S(H3SA,H3SB)
2.b Aromatic/amide H refined with riding coordinates:
 C6(H6), C31(H31), C14(H14), C29(H29), C36(H36), C4(H4), C11(H11), C22(H22),
 C45(H45), C20(H20), C48(H48), C39(H39)
2.c Idealised Me refined as rotating group:
 C10(H10A,H10B,H10C), C19(H19A,H19B,H19C), C16(H16A,H16B,H16C), C24(H24A,H24B,
 H24C), C13(H13A,H13B,H13C), C25(H25A,H25B,H25C), C44(H44A,H44B,H44C), C49(H49A,
 H49B,H49C), C38(H38A,H38B,H38C), C6S(H6SA,H6SB,H6SC), C35(H35A,H35B,H35C),
 C47(H47A,H47B,H47C), C41(H41A,H41B,H41C), C8S(H8SA,H8SB,H8SC), C2S(H2SA,H2SB,
 H2SC), C4S(H4SA,H4SB,H4SC)
;
_atom_sites_solution_hydrogens    geom
_atom_sites_solution_primary      ?
_atom_sites_solution_secondary    ?
loop_
  _atom_site_label
  _atom_site_type_symbol
  _atom_site_fract_x
  _atom_site_fract_y
  _atom_site_fract_z
  _atom_site_U_iso_or_equiv
  _atom_site_adp_type
  _atom_site_occupancy
  _atom_site_site_symmetry_order
  _atom_site_calc_flag
  _atom_site_refinement_flags_posn
  _atom_site_refinement_flags_adp
  _atom_site_refinement_flags_occupancy
  _atom_site_disorder_assembly
  _atom_site_disorder_group
 O2S O 0.15141(10) 0.47948(9) 0.91940(8) 0.0272(3) Uani 1 1 d . . . . .
 N1 N 0.60809(11) 0.82818(10) 0.90765(9) 0.0166(3) Uani 1 1 d . . . . .
 O1S O 0.58630(11) 0.82979(10) 0.51155(10) 0.0355(3) Uani 1 1 d . . . . .
 N2 N 0.85832(12) 0.53154(10) 0.64709(10) 0.0196(3) Uani 1 1 d . . . . .
 C6 C 0.44159(13) 0.58334(12) 0.94146(11) 0.0142(3) Uani 1 1 d . . . . .
 H6 H 0.3690 0.5415 0.9283 0.017 Uiso 1 1 calc R . . . .
 C3 C 0.65481(13) 0.70676(12) 0.98172(11) 0.0156(4) Uani 1 1 d . . . . .
 C8 C 0.38473(13) 0.70907(12) 0.87030(11) 0.0150(4) Uani 1 1 d . . . . .
 C5 C 0.51652(13) 0.54991(11) 0.98649(11) 0.0136(3) Uani 1 1 d . . . . .
 C9 C 0.34479(13) 0.79220(12) 0.91811(11) 0.0167(4) Uani 1 1 d . . . . .
 C7 C 0.46977(13) 0.67566(11) 0.91528(11) 0.0139(3) Uani 1 1 d . . . . .
 C32 C 0.74049(13) 0.60520(12) 0.57312(11) 0.0166(4) Uani 1 1 d . . . . .
 C18 C 0.85620(13) 0.74338(12) 0.96285(11) 0.0183(4) Uani 1 1 d . . . . .
 C17 C 0.76878(13) 0.77357(12) 1.00721(11) 0.0164(4) Uani 1 1 d . . . . .
 C27 C 0.75609(13) 0.52336(12) 0.60637(11) 0.0170(4) Uani 1 1 d . . . . .
 C15 C 0.34146(13) 0.65427(12) 0.78253(11) 0.0167(4) Uani 1 1 d . . . . .
 C28 C 0.67314(13) 0.43278(12) 0.59934(11) 0.0169(4) Uani 1 1 d . . . . .
 C2 C 0.57759(13) 0.73548(12) 0.93520(11) 0.0154(4) Uani 1 1 d . . . . .
 C31 C 0.63874(13) 0.59464(12) 0.53269(11) 0.0169(4) Uani 1 1 d . . . . .
 H31 H 0.6265 0.6501 0.5108 0.020 Uiso 1 1 calc R . . . .
 C14 C 0.25648(13) 0.68204(13) 0.74492(12) 0.0193(4) Uani 1 1 d . . . . .
 H14 H 0.2259 0.6440 0.6862 0.023 Uiso 1 1 calc R . . . .
 C30 C 0.55365(13) 0.50526(12) 0.52302(11) 0.0158(4) Uani 1 1 d . . . . .
 C33 C 0.82974(13) 0.70126(12) 0.57777(11) 0.0170(4) Uani 1 1 d . . . . .
 C12 C 0.21524(14) 0.76389(12) 0.79100(12) 0.0199(4) Uani 1 1 d . . . . .
 C21 C 0.98242(14) 0.89486(13) 1.05958(12) 0.0213(4) Uani 1 1 d . . . . .
 C23 C 0.78751(14) 0.86315(12) 1.07900(12) 0.0199(4) Uani 1 1 d . . . . .
 C43 C 0.74168(14) 0.27327(13) 0.57833(12) 0.0203(4) Uani 1 1 d . . . . .
 C29 C 0.57341(13) 0.42535(12) 0.55714(11) 0.0173(4) Uani 1 1 d . . . . .
 H29 H 0.5167 0.3640 0.5512 0.021 Uiso 1 1 calc R . . . .
 C34 C 0.84005(14) 0.78917(12) 0.64956(12) 0.0212(4) Uani 1 1 d . . . . .
 C36 C 0.92162(14) 0.87847(13) 0.64961(13) 0.0244(4) Uani 1 1 d . . . . .
 H36 H 0.9295 0.9382 0.6984 0.029 Uiso 1 1 calc R . . . .
 C42 C 0.69043(13) 0.34369(12) 0.63261(11) 0.0175(4) Uani 1 1 d . . . . .
 C40 C 0.89885(14) 0.70357(13) 0.50726(12) 0.0219(4) Uani 1 1 d . . . . .
 C4 C 0.62257(13) 0.61325(12) 1.00602(11) 0.0168(4) Uani 1 1 d . . . . .
 H4 H 0.6743 0.5918 1.0368 0.020 Uiso 1 1 calc R . . . .
 C11 C 0.26109(13) 0.81823(12) 0.87700(12) 0.0195(4) Uani 1 1 d . . . . .
 H11 H 0.2345 0.8749 0.9088 0.023 Uiso 1 1 calc R . . . .
 C22 C 0.89425(14) 0.92180(13) 1.10400(12) 0.0222(4) Uani 1 1 d . . . . .
 H22 H 0.9074 0.9821 1.1529 0.027 Uiso 1 1 calc R . . . .
 C45 C 0.75362(14) 0.18849(13) 0.60773(12) 0.0244(4) Uani 1 1 d . . . . .
 H45 H 0.7874 0.1402 0.5707 0.029 Uiso 1 1 calc R . . . .
 C20 C 0.96164(14) 0.80545(13) 0.98954(12) 0.0208(4) Uani 1 1 d . . . . .
 H20 H 1.0209 0.7858 0.9588 0.025 Uiso 1 1 calc R . . . .
 C010 C 0.65147(14) 0.32794(13) 0.71456(11) 0.0205(4) Uani 1 1 d . . . . .
 C46 C 0.71790(15) 0.17190(13) 0.68925(12) 0.0247(4) Uani 1 1 d . . . . .
 C10 C 0.38880(15) 0.85219(13) 1.01281(12) 0.0232(4) Uani 1 1 d . . . . .
 H10A H 0.4077 0.8051 1.0452 0.035 Uiso 1 1 calc GR . . . .
 H10B H 0.3333 0.8834 1.0440 0.035 Uiso 1 1 calc GR . . . .
 H10C H 0.4539 0.9070 1.0106 0.035 Uiso 1 1 calc GR . . . .
 C37 C 0.99101(14) 0.88265(13) 0.58118(13) 0.0238(4) Uani 1 1 d . . . . .
 C19 C 0.83936(15) 0.64483(13) 0.88900(13) 0.0269(4) Uani 1 1 d . . . . .
 H19A H 0.8264 0.5853 0.9154 0.040 Uiso 1 1 calc GR . . . .
 H19B H 0.9044 0.6471 0.8547 0.040 Uiso 1 1 calc GR . . . .
 H19C H 0.7763 0.6380 0.8488 0.040 Uiso 1 1 calc GR . . . .
 C16 C 0.38568(15) 0.56716(13) 0.72854(12) 0.0243(4) Uani 1 1 d . . . . .
 H16A H 0.4655 0.5881 0.7348 0.037 Uiso 1 1 calc GR . . . .
 H16B H 0.3608 0.5517 0.6650 0.037 Uiso 1 1 calc GR . . . .
 H16C H 0.3595 0.5052 0.7508 0.037 Uiso 1 1 calc GR . . . .
 C48 C 0.66647(15) 0.24192(13) 0.74122(12) 0.0255(4) Uani 1 1 d . . . . .
 H48 H 0.6406 0.2310 0.7968 0.031 Uiso 1 1 calc R . . . .
 C39 C 0.97815(14) 0.79505(14) 0.51004(13) 0.0265(4) Uani 1 1 d . . . . .
 H39 H 1.0245 0.7974 0.4619 0.032 Uiso 1 1 calc R . . . .
 C24 C 0.69494(15) 0.89485(14) 1.13037(13) 0.0282(4) Uani 1 1 d . . . . .
 H24A H 0.6512 0.9199 1.0923 0.042 Uiso 1 1 calc GR . . . .
 H24B H 0.7245 0.9503 1.1847 0.042 Uiso 1 1 calc GR . . . .
 H24C H 0.6491 0.8349 1.1475 0.042 Uiso 1 1 calc GR . . . .
 C5S C 0.12129(15) 0.57524(14) 0.94996(13) 0.0285(4) Uani 1 1 d . . . . .
 H5SA H 0.0411 0.5616 0.9514 0.034 Uiso 1 1 calc R . . . .
 H5SB H 0.1451 0.6196 0.9082 0.034 Uiso 1 1 calc R . . . .
 C13 C 0.12376(15) 0.79289(14) 0.74854(13) 0.0275(4) Uani 1 1 d . . . . .
 H13A H 0.1535 0.8545 0.7266 0.041 Uiso 1 1 calc GR . . . .
 H13B H 0.0715 0.8078 0.7934 0.041 Uiso 1 1 calc GR . . . .
 H13C H 0.0870 0.7351 0.6981 0.041 Uiso 1 1 calc GR . . . .
 C25 C 1.09700(14) 0.96099(14) 1.08652(13) 0.0299(5) Uani 1 1 d . . . . .
 H25A H 1.1135 1.0142 1.0528 0.045 Uiso 1 1 calc GR . . . .
 H25B H 1.1483 0.9172 1.0731 0.045 Uiso 1 1 calc GR . . . .
 H25C H 1.1037 0.9946 1.1512 0.045 Uiso 1 1 calc GR . . . .
 C1 C 0.62985(15) 0.90363(13) 0.88317(12) 0.0246(4) Uani 1 1 d . . . . .
 C44 C 0.78147(16) 0.28801(14) 0.48897(12) 0.0293(4) Uani 1 1 d . . . . .
 H44A H 0.7249 0.3043 0.4556 0.044 Uiso 1 1 calc GR . . . .
 H44B H 0.7978 0.2241 0.4541 0.044 Uiso 1 1 calc GR . . . .
 H44C H 0.8475 0.3452 0.4992 0.044 Uiso 1 1 calc GR . . . .
 C49 C 0.59404(16) 0.40083(14) 0.77351(13) 0.0305(5) Uani 1 1 d . . . . .
 H49A H 0.6341 0.4727 0.7780 0.046 Uiso 1 1 calc GR . . . .
 H49B H 0.5907 0.3885 0.8337 0.046 Uiso 1 1 calc GR . . . .
 H49C H 0.5200 0.3887 0.7472 0.046 Uiso 1 1 calc GR . . . .
 C7S C 0.10504(16) 0.42554(14) 0.83083(13) 0.0314(5) Uani 1 1 d . . . . .
 H7SA H 0.1314 0.4683 0.7883 0.038 Uiso 1 1 calc R . . . .
 H7SB H 0.0247 0.4119 0.8295 0.038 Uiso 1 1 calc R . . . .
 C26 C 0.94265(16) 0.53774(14) 0.68088(14) 0.0316(5) Uani 1 1 d . . . . .
 C38 C 1.08182(16) 0.97923(14) 0.58561(15) 0.0357(5) Uani 1 1 d . . . . .
 H38A H 1.0613 1.0401 0.6222 0.054 Uiso 1 1 calc GR . . . .
 H38B H 1.0941 0.9875 0.5247 0.054 Uiso 1 1 calc GR . . . .
 H38C H 1.1487 0.9724 0.6129 0.054 Uiso 1 1 calc GR . . . .
 C6S C 0.17426(16) 0.62987(15) 1.04275(13) 0.0330(5) Uani 1 1 d . . . . .
 H6SA H 0.2535 0.6428 1.0409 0.050 Uiso 1 1 calc GR . . . .
 H6SB H 0.1491 0.5863 1.0841 0.050 Uiso 1 1 calc GR . . . .
 H6SC H 0.1547 0.6961 1.0637 0.050 Uiso 1 1 calc GR . . . .
 C35 C 0.76653(17) 0.78951(15) 0.72575(14) 0.0387(5) Uani 1 1 d . . . . .
 H35A H 0.6974 0.7375 0.7049 0.058 Uiso 1 1 calc GR . . . .
 H35B H 0.7528 0.8583 0.7467 0.058 Uiso 1 1 calc GR . . . .
 H35C H 0.8014 0.7729 0.7753 0.058 Uiso 1 1 calc GR . . . .
 C47 C 0.73725(19) 0.08130(15) 0.72062(15) 0.0418(5) Uani 1 1 d . . . . .
 H47A H 0.7342 0.0227 0.6684 0.063 Uiso 1 1 calc GR . . . .
 H47B H 0.6810 0.0609 0.7607 0.063 Uiso 1 1 calc GR . . . .
 H47C H 0.8091 0.1017 0.7531 0.063 Uiso 1 1 calc GR . . . .
 C41 C 0.88833(17) 0.60990(15) 0.42925(14) 0.0387(5) Uani 1 1 d . . . . .
 H41A H 0.8935 0.5504 0.4518 0.058 Uiso 1 1 calc GR . . . .
 H41B H 0.9469 0.6242 0.3893 0.058 Uiso 1 1 calc GR . . . .
 H41C H 0.8177 0.5942 0.3958 0.058 Uiso 1 1 calc GR . . . .
 C1S C 0.61215(18) 0.86220(16) 0.43178(15) 0.0412(5) Uani 1 1 d . . . . .
 H1SA H 0.6491 0.9372 0.4470 0.049 Uiso 1 1 calc R . . . .
 H1SB H 0.5447 0.8505 0.3938 0.049 Uiso 1 1 calc R . . . .
 C3S C 0.51297(18) 0.88146(16) 0.56197(16) 0.0433(6) Uani 1 1 d . . . . .
 H3SA H 0.4444 0.8677 0.5249 0.052 Uiso 1 1 calc R . . . .
 H3SB H 0.5457 0.9573 0.5793 0.052 Uiso 1 1 calc R . . . .
 C8S C 0.1375(2) 0.32488(16) 0.80347(14) 0.0462(6) Uani 1 1 d . . . . .
 H8SA H 0.1036 0.2859 0.7435 0.069 Uiso 1 1 calc GR . . . .
 H8SB H 0.1132 0.2839 0.8469 0.069 Uiso 1 1 calc GR . . . .
 H8SC H 0.2169 0.3391 0.8021 0.069 Uiso 1 1 calc GR . . . .
 C2S C 0.6858(2) 0.80050(17) 0.38171(17) 0.0520(6) Uani 1 1 d . . . . .
 H2SA H 0.7513 0.8110 0.4204 0.078 Uiso 1 1 calc GR . . . .
 H2SB H 0.7065 0.8236 0.3273 0.078 Uiso 1 1 calc GR . . . .
 H2SC H 0.6475 0.7267 0.3648 0.078 Uiso 1 1 calc GR . . . .
 C4S C 0.4895(2) 0.8424(2) 0.64528(17) 0.0587(7) Uani 1 1 d . . . . .
 H4SA H 0.5570 0.8601 0.6835 0.088 Uiso 1 1 calc GR . . . .
 H4SB H 0.4602 0.7669 0.6277 0.088 Uiso 1 1 calc GR . . . .
 H4SC H 0.4361 0.8749 0.6786 0.088 Uiso 1 1 calc GR . . . .

loop_
  _atom_site_aniso_label
  _atom_site_aniso_U_11
  _atom_site_aniso_U_22
  _atom_site_aniso_U_33
  _atom_site_aniso_U_23
  _atom_site_aniso_U_13
  _atom_site_aniso_U_12
 O2S 0.0281(7) 0.0247(7) 0.0302(7) 0.0096(6) -0.0027(6) 0.0064(6)
 N1 0.0143(7) 0.0139(7) 0.0219(8) 0.0065(6) 0.0016(6) 0.0024(6)
 O1S 0.0322(8) 0.0265(7) 0.0509(9) 0.0205(7) -0.0028(7) 0.0028(6)
 N2 0.0181(8) 0.0151(7) 0.0258(8) 0.0074(6) -0.0034(7) 0.0025(6)
 C6 0.0106(8) 0.0123(8) 0.0186(9) 0.0042(7) 0.0009(7) 0.0004(7)
 C3 0.0143(9) 0.0128(8) 0.0196(9) 0.0047(7) 0.0006(7) 0.0024(7)
 C8 0.0124(8) 0.0128(8) 0.0226(9) 0.0111(7) 0.0035(7) 0.0014(7)
 C5 0.0138(8) 0.0110(8) 0.0160(8) 0.0040(7) 0.0015(7) 0.0027(7)
 C9 0.0155(9) 0.0135(8) 0.0229(9) 0.0092(7) 0.0045(7) 0.0026(7)
 C7 0.0137(8) 0.0116(8) 0.0164(8) 0.0031(7) 0.0013(7) 0.0039(7)
 C32 0.0164(9) 0.0134(8) 0.0200(9) 0.0049(7) 0.0001(7) 0.0030(7)
 C18 0.0172(9) 0.0156(8) 0.0243(9) 0.0110(7) -0.0016(7) 0.0025(7)
 C17 0.0154(9) 0.0122(8) 0.0226(9) 0.0103(7) -0.0024(7) -0.0007(7)
 C27 0.0159(9) 0.0182(9) 0.0180(9) 0.0056(7) -0.0020(7) 0.0053(7)
 C15 0.0166(9) 0.0145(8) 0.0214(9) 0.0097(7) 0.0034(7) 0.0032(7)
 C28 0.0189(9) 0.0148(8) 0.0182(9) 0.0063(7) -0.0003(7) 0.0043(7)
 C2 0.0178(9) 0.0104(8) 0.0196(9) 0.0070(7) 0.0030(7) 0.0033(7)
 C31 0.0177(9) 0.0142(8) 0.0211(9) 0.0077(7) -0.0005(7) 0.0053(7)
 C14 0.0202(9) 0.0194(9) 0.0202(9) 0.0105(7) 0.0001(7) 0.0029(7)
 C30 0.0165(9) 0.0140(8) 0.0178(9) 0.0054(7) 0.0008(7) 0.0044(7)
 C33 0.0141(9) 0.0149(8) 0.0238(9) 0.0095(7) -0.0044(7) 0.0025(7)
 C12 0.0179(9) 0.0187(9) 0.0279(10) 0.0157(8) 0.0025(8) 0.0040(7)
 C21 0.0180(9) 0.0212(9) 0.0252(10) 0.0141(8) -0.0035(8) -0.0022(7)
 C23 0.0200(9) 0.0161(9) 0.0241(10) 0.0100(7) -0.0010(8) 0.0004(7)
 C43 0.0201(9) 0.0183(9) 0.0230(9) 0.0086(7) -0.0013(8) 0.0027(7)
 C29 0.0171(9) 0.0133(8) 0.0215(9) 0.0071(7) 0.0005(7) 0.0011(7)
 C34 0.0202(9) 0.0162(9) 0.0279(10) 0.0073(8) -0.0023(8) 0.0045(7)
 C36 0.0251(10) 0.0129(8) 0.0328(11) 0.0022(8) -0.0061(8) 0.0039(8)
 C42 0.0150(9) 0.0142(8) 0.0233(9) 0.0070(7) -0.0042(7) 0.0014(7)
 C40 0.0175(9) 0.0217(9) 0.0260(10) 0.0082(8) -0.0014(8) 0.0021(7)
 C4 0.0157(9) 0.0150(8) 0.0217(9) 0.0081(7) -0.0014(7) 0.0042(7)
 C11 0.0185(9) 0.0140(8) 0.0307(10) 0.0111(8) 0.0064(8) 0.0071(7)
 C22 0.0254(10) 0.0155(8) 0.0230(10) 0.0066(7) -0.0046(8) -0.0017(8)
 C45 0.0254(10) 0.0193(9) 0.0314(11) 0.0084(8) 0.0013(8) 0.0092(8)
 C20 0.0149(9) 0.0235(9) 0.0270(10) 0.0132(8) 0.0017(8) 0.0033(7)
 C010 0.0190(9) 0.0192(9) 0.0225(10) 0.0078(7) -0.0030(8) 0.0010(7)
 C46 0.0261(10) 0.0200(9) 0.0307(11) 0.0136(8) -0.0050(8) 0.0037(8)
 C10 0.0241(10) 0.0199(9) 0.0263(10) 0.0048(8) 0.0019(8) 0.0080(8)
 C37 0.0189(9) 0.0193(9) 0.0360(11) 0.0152(8) -0.0044(8) 0.0019(8)
 C19 0.0199(10) 0.0226(9) 0.0372(11) 0.0067(8) 0.0009(8) 0.0046(8)
 C16 0.0268(10) 0.0254(9) 0.0217(10) 0.0035(8) -0.0015(8) 0.0108(8)
 C48 0.0298(11) 0.0261(10) 0.0229(10) 0.0145(8) -0.0005(8) 0.0033(8)
 C39 0.0196(10) 0.0304(10) 0.0307(11) 0.0146(9) 0.0028(8) 0.0017(8)
 C24 0.0260(10) 0.0234(10) 0.0304(11) 0.0030(8) 0.0007(9) 0.0011(8)
 C5S 0.0226(10) 0.0251(10) 0.0433(12) 0.0190(9) 0.0055(9) 0.0058(8)
 C13 0.0237(10) 0.0291(10) 0.0356(11) 0.0157(9) -0.0012(8) 0.0100(8)
 C25 0.0212(10) 0.0317(10) 0.0339(11) 0.0130(9) -0.0047(8) -0.0032(8)
 C1 0.0264(10) 0.0182(9) 0.0303(11) 0.0090(8) 0.0054(8) 0.0047(8)
 C44 0.0382(12) 0.0273(10) 0.0284(11) 0.0125(8) 0.0074(9) 0.0139(9)
 C49 0.0367(11) 0.0294(10) 0.0276(11) 0.0093(9) 0.0064(9) 0.0106(9)
 C7S 0.0330(11) 0.0318(11) 0.0286(11) 0.0128(9) -0.0038(9) 0.0018(9)
 C26 0.0283(11) 0.0270(10) 0.0387(12) 0.0062(9) -0.0074(9) 0.0079(9)
 C38 0.0279(11) 0.0258(10) 0.0516(13) 0.0167(10) -0.0049(10) -0.0034(9)
 C6S 0.0317(11) 0.0268(10) 0.0414(12) 0.0100(9) 0.0077(9) 0.0073(9)
 C35 0.0416(13) 0.0265(11) 0.0400(12) 0.0013(9) 0.0115(10) 0.0012(9)
 C47 0.0536(14) 0.0313(11) 0.0503(14) 0.0252(10) -0.0025(11) 0.0141(10)
 C41 0.0379(12) 0.0349(11) 0.0329(12) 0.0010(9) 0.0116(10) -0.0023(10)
 C1S 0.0382(13) 0.0307(11) 0.0555(14) 0.0237(10) -0.0059(11) -0.0024(10)
 C3S 0.0352(12) 0.0359(12) 0.0567(15) 0.0120(11) -0.0067(11) 0.0049(10)
 C8S 0.0697(17) 0.0344(12) 0.0337(12) 0.0086(10) -0.0112(11) 0.0118(11)
 C2S 0.0506(15) 0.0365(12) 0.0678(17) 0.0220(12) 0.0099(13) 0.0000(11)
 C4S 0.0586(17) 0.0573(16) 0.0550(16) 0.0170(13) 0.0031(13) 0.0025(13)

_geom_special_details
;
 All esds (except the esd in the dihedral angle between two l.s. planes)
 are estimated using the full covariance matrix.  The cell esds are taken
 into account individually in the estimation of esds in distances, angles
 and torsion angles; correlations between esds in cell parameters are only
 used when they are defined by crystal symmetry.  An approximate (isotropic)
 treatment of cell esds is used for estimating esds involving l.s. planes.
;
loop_
  _geom_bond_atom_site_label_1
  _geom_bond_atom_site_label_2
  _geom_bond_distance
  _geom_bond_site_symmetry_2
  _geom_bond_publ_flag
 O2S C5S 1.429(2) . ?
 O2S C7S 1.424(2) . ?
 N1 C2 1.4070(19) . ?
 N1 C1 1.160(2) . ?
 O1S C1S 1.418(2) . ?
 O1S C3S 1.425(3) . ?
 N2 C27 1.405(2) . ?
 N2 C26 1.162(2) . ?
 C6 H6 0.9500 . ?
 C6 C5 1.400(2) . ?
 C6 C7 1.390(2) . ?
 C3 C17 1.502(2) . ?
 C3 C2 1.396(2) . ?
 C3 C4 1.393(2) . ?
 C8 C9 1.406(2) . ?
 C8 C7 1.499(2) . ?
 C8 C15 1.406(2) . ?
 C5 C5 1.494(3) 2_667 ?
 C5 C4 1.398(2) . ?
 C9 C11 1.395(2) . ?
 C9 C10 1.511(2) . ?
 C7 C2 1.401(2) . ?
 C32 C27 1.399(2) . ?
 C32 C31 1.390(2) . ?
 C32 C33 1.501(2) . ?
 C18 C17 1.401(2) . ?
 C18 C20 1.397(2) . ?
 C18 C19 1.505(2) . ?
 C17 C23 1.405(2) . ?
 C27 C28 1.400(2) . ?
 C15 C14 1.396(2) . ?
 C15 C16 1.510(2) . ?
 C28 C29 1.389(2) . ?
 C28 C42 1.500(2) . ?
 C31 H31 0.9500 . ?
 C31 C30 1.399(2) . ?
 C14 H14 0.9500 . ?
 C14 C12 1.393(2) . ?
 C30 C30 1.490(3) 2_666 ?
 C30 C29 1.401(2) . ?
 C33 C34 1.399(2) . ?
 C33 C40 1.399(2) . ?
 C12 C11 1.391(2) . ?
 C12 C13 1.510(2) . ?
 C21 C22 1.394(3) . ?
 C21 C20 1.387(2) . ?
 C21 C25 1.508(2) . ?
 C23 C22 1.393(2) . ?
 C23 C24 1.512(3) . ?
 C43 C42 1.404(2) . ?
 C43 C45 1.389(2) . ?
 C43 C44 1.509(2) . ?
 C29 H29 0.9500 . ?
 C34 C36 1.399(2) . ?
 C34 C35 1.501(3) . ?
 C36 H36 0.9500 . ?
 C36 C37 1.378(3) . ?
 C42 C010 1.402(2) . ?
 C40 C39 1.396(2) . ?
 C40 C41 1.505(3) . ?
 C4 H4 0.9500 . ?
 C11 H11 0.9500 . ?
 C22 H22 0.9500 . ?
 C45 H45 0.9500 . ?
 C45 C46 1.387(3) . ?
 C20 H20 0.9500 . ?
 C010 C48 1.397(2) . ?
 C010 C49 1.507(3) . ?
 C46 C48 1.387(3) . ?
 C46 C47 1.513(2) . ?
 C10 H10A 0.9800 . ?
 C10 H10B 0.9800 . ?
 C10 H10C 0.9800 . ?
 C37 C39 1.387(3) . ?
 C37 C38 1.517(2) . ?
 C19 H19A 0.9800 . ?
 C19 H19B 0.9800 . ?
 C19 H19C 0.9800 . ?
 C16 H16A 0.9800 . ?
 C16 H16B 0.9800 . ?
 C16 H16C 0.9800 . ?
 C48 H48 0.9500 . ?
 C39 H39 0.9500 . ?
 C24 H24A 0.9800 . ?
 C24 H24B 0.9800 . ?
 C24 H24C 0.9800 . ?
 C5S H5SA 0.9900 . ?
 C5S H5SB 0.9900 . ?
 C5S C6S 1.504(3) . ?
 C13 H13A 0.9800 . ?
 C13 H13B 0.9800 . ?
 C13 H13C 0.9800 . ?
 C25 H25A 0.9800 . ?
 C25 H25B 0.9800 . ?
 C25 H25C 0.9800 . ?
 C44 H44A 0.9800 . ?
 C44 H44B 0.9800 . ?
 C44 H44C 0.9800 . ?
 C49 H49A 0.9800 . ?
 C49 H49B 0.9800 . ?
 C49 H49C 0.9800 . ?
 C7S H7SA 0.9900 . ?
 C7S H7SB 0.9900 . ?
 C7S C8S 1.501(3) . ?
 C38 H38A 0.9800 . ?
 C38 H38B 0.9800 . ?
 C38 H38C 0.9800 . ?
 C6S H6SA 0.9800 . ?
 C6S H6SB 0.9800 . ?
 C6S H6SC 0.9800 . ?
 C35 H35A 0.9800 . ?
 C35 H35B 0.9800 . ?
 C35 H35C 0.9800 . ?
 C47 H47A 0.9800 . ?
 C47 H47B 0.9800 . ?
 C47 H47C 0.9800 . ?
 C41 H41A 0.9800 . ?
 C41 H41B 0.9800 . ?
 C41 H41C 0.9800 . ?
 C1S H1SA 0.9900 . ?
 C1S H1SB 0.9900 . ?
 C1S C2S 1.503(3) . ?
 C3S H3SA 0.9900 . ?
 C3S H3SB 0.9900 . ?
 C3S C4S 1.510(3) . ?
 C8S H8SA 0.9800 . ?
 C8S H8SB 0.9800 . ?
 C8S H8SC 0.9800 . ?
 C2S H2SA 0.9800 . ?
 C2S H2SB 0.9800 . ?
 C2S H2SC 0.9800 . ?
 C4S H4SA 0.9800 . ?
 C4S H4SB 0.9800 . ?
 C4S H4SC 0.9800 . ?

loop_
  _geom_angle_atom_site_label_1
  _geom_angle_atom_site_label_2
  _geom_angle_atom_site_label_3
  _geom_angle
  _geom_angle_site_symmetry_1
  _geom_angle_site_symmetry_3
  _geom_angle_publ_flag
 C7S O2S C5S 111.40(14) . . ?
 C1 N1 C2 177.64(17) . . ?
 C1S O1S C3S 112.46(15) . . ?
 C26 N2 C27 179.59(18) . . ?
 C5 C6 H6 118.9 . . ?
 C7 C6 H6 118.9 . . ?
 C7 C6 C5 122.26(14) . . ?
 C2 C3 C17 122.41(14) . . ?
 C4 C3 C17 119.85(14) . . ?
 C4 C3 C2 117.73(15) . . ?
 C9 C8 C7 119.51(14) . . ?
 C9 C8 C15 120.31(15) . . ?
 C15 C8 C7 120.11(14) . . ?
 C6 C5 C5 120.84(17) . 2_667 ?
 C4 C5 C6 117.92(14) . . ?
 C4 C5 C5 121.24(18) . 2_667 ?
 C8 C9 C10 121.69(15) . . ?
 C11 C9 C8 118.67(15) . . ?
 C11 C9 C10 119.63(15) . . ?
 C6 C7 C8 119.67(14) . . ?
 C6 C7 C2 117.55(14) . . ?
 C2 C7 C8 122.75(13) . . ?
 C27 C32 C33 122.44(14) . . ?
 C31 C32 C27 117.87(14) . . ?
 C31 C32 C33 119.67(14) . . ?
 C17 C18 C19 121.65(15) . . ?
 C20 C18 C17 118.86(15) . . ?
 C20 C18 C19 119.47(16) . . ?
 C18 C17 C3 120.03(14) . . ?
 C18 C17 C23 120.36(15) . . ?
 C23 C17 C3 119.51(15) . . ?
 C32 C27 N2 119.16(14) . . ?
 C32 C27 C28 121.96(15) . . ?
 C28 C27 N2 118.88(14) . . ?
 C8 C15 C16 121.31(15) . . ?
 C14 C15 C8 118.88(15) . . ?
 C14 C15 C16 119.81(15) . . ?
 C27 C28 C42 122.13(14) . . ?
 C29 C28 C27 117.96(14) . . ?
 C29 C28 C42 119.87(14) . . ?
 C3 C2 N1 119.25(14) . . ?
 C3 C2 C7 122.43(14) . . ?
 C7 C2 N1 118.32(14) . . ?
 C32 C31 H31 118.8 . . ?
 C32 C31 C30 122.38(14) . . ?
 C30 C31 H31 118.8 . . ?
 C15 C14 H14 119.0 . . ?
 C12 C14 C15 121.91(16) . . ?
 C12 C14 H14 119.0 . . ?
 C31 C30 C30 121.26(17) . 2_666 ?
 C31 C30 C29 117.58(14) . . ?
 C29 C30 C30 121.15(17) . 2_666 ?
 C34 C33 C32 120.24(15) . . ?
 C34 C33 C40 120.46(15) . . ?
 C40 C33 C32 119.22(15) . . ?
 C14 C12 C13 120.88(16) . . ?
 C11 C12 C14 118.03(15) . . ?
 C11 C12 C13 121.09(16) . . ?
 C22 C21 C25 121.11(16) . . ?
 C20 C21 C22 117.99(15) . . ?
 C20 C21 C25 120.90(17) . . ?
 C17 C23 C24 121.33(15) . . ?
 C22 C23 C17 118.67(16) . . ?
 C22 C23 C24 119.98(16) . . ?
 C42 C43 C44 120.83(15) . . ?
 C45 C43 C42 118.76(16) . . ?
 C45 C43 C44 120.40(16) . . ?
 C28 C29 C30 122.24(14) . . ?
 C28 C29 H29 118.9 . . ?
 C30 C29 H29 118.9 . . ?
 C33 C34 C35 121.76(15) . . ?
 C36 C34 C33 118.49(16) . . ?
 C36 C34 C35 119.76(16) . . ?
 C34 C36 H36 118.9 . . ?
 C37 C36 C34 122.19(17) . . ?
 C37 C36 H36 118.9 . . ?
 C43 C42 C28 118.91(15) . . ?
 C010 C42 C28 120.64(15) . . ?
 C010 C42 C43 120.37(15) . . ?
 C33 C40 C41 121.11(15) . . ?
 C39 C40 C33 118.78(16) . . ?
 C39 C40 C41 120.11(16) . . ?
 C3 C4 C5 122.09(15) . . ?
 C3 C4 H4 119.0 . . ?
 C5 C4 H4 119.0 . . ?
 C9 C11 H11 118.9 . . ?
 C12 C11 C9 122.19(15) . . ?
 C12 C11 H11 118.9 . . ?
 C21 C22 H22 118.9 . . ?
 C23 C22 C21 122.10(16) . . ?
 C23 C22 H22 118.9 . . ?
 C43 C45 H45 118.9 . . ?
 C46 C45 C43 122.24(17) . . ?
 C46 C45 H45 118.9 . . ?
 C18 C20 H20 119.0 . . ?
 C21 C20 C18 121.98(17) . . ?
 C21 C20 H20 119.0 . . ?
 C42 C010 C49 121.72(15) . . ?
 C48 C010 C42 118.48(16) . . ?
 C48 C010 C49 119.80(16) . . ?
 C45 C46 C48 117.92(16) . . ?
 C45 C46 C47 120.47(17) . . ?
 C48 C46 C47 121.60(17) . . ?
 C9 C10 H10A 109.5 . . ?
 C9 C10 H10B 109.5 . . ?
 C9 C10 H10C 109.5 . . ?
 H10A C10 H10B 109.5 . . ?
 H10A C10 H10C 109.5 . . ?
 H10B C10 H10C 109.5 . . ?
 C36 C37 C39 118.28(16) . . ?
 C36 C37 C38 120.70(17) . . ?
 C39 C37 C38 120.98(17) . . ?
 C18 C19 H19A 109.5 . . ?
 C18 C19 H19B 109.5 . . ?
 C18 C19 H19C 109.5 . . ?
 H19A C19 H19B 109.5 . . ?
 H19A C19 H19C 109.5 . . ?
 H19B C19 H19C 109.5 . . ?
 C15 C16 H16A 109.5 . . ?
 C15 C16 H16B 109.5 . . ?
 C15 C16 H16C 109.5 . . ?
 H16A C16 H16B 109.5 . . ?
 H16A C16 H16C 109.5 . . ?
 H16B C16 H16C 109.5 . . ?
 C010 C48 H48 118.9 . . ?
 C46 C48 C010 122.21(16) . . ?
 C46 C48 H48 118.9 . . ?
 C40 C39 H39 119.1 . . ?
 C37 C39 C40 121.79(17) . . ?
 C37 C39 H39 119.1 . . ?
 C23 C24 H24A 109.5 . . ?
 C23 C24 H24B 109.5 . . ?
 C23 C24 H24C 109.5 . . ?
 H24A C24 H24B 109.5 . . ?
 H24A C24 H24C 109.5 . . ?
 H24B C24 H24C 109.5 . . ?
 O2S C5S H5SA 109.8 . . ?
 O2S C5S H5SB 109.8 . . ?
 O2S C5S C6S 109.15(15) . . ?
 H5SA C5S H5SB 108.3 . . ?
 C6S C5S H5SA 109.9 . . ?
 C6S C5S H5SB 109.8 . . ?
 C12 C13 H13A 109.5 . . ?
 C12 C13 H13B 109.5 . . ?
 C12 C13 H13C 109.5 . . ?
 H13A C13 H13B 109.5 . . ?
 H13A C13 H13C 109.5 . . ?
 H13B C13 H13C 109.5 . . ?
 C21 C25 H25A 109.5 . . ?
 C21 C25 H25B 109.5 . . ?
 C21 C25 H25C 109.5 . . ?
 H25A C25 H25B 109.5 . . ?
 H25A C25 H25C 109.5 . . ?
 H25B C25 H25C 109.5 . . ?
 C43 C44 H44A 109.5 . . ?
 C43 C44 H44B 109.5 . . ?
 C43 C44 H44C 109.5 . . ?
 H44A C44 H44B 109.5 . . ?
 H44A C44 H44C 109.5 . . ?
 H44B C44 H44C 109.5 . . ?
 C010 C49 H49A 109.5 . . ?
 C010 C49 H49B 109.5 . . ?
 C010 C49 H49C 109.5 . . ?
 H49A C49 H49B 109.5 . . ?
 H49A C49 H49C 109.5 . . ?
 H49B C49 H49C 109.5 . . ?
 O2S C7S H7SA 109.9 . . ?
 O2S C7S H7SB 109.9 . . ?
 O2S C7S C8S 108.85(16) . . ?
 H7SA C7S H7SB 108.3 . . ?
 C8S C7S H7SA 109.9 . . ?
 C8S C7S H7SB 109.9 . . ?
 C37 C38 H38A 109.5 . . ?
 C37 C38 H38B 109.5 . . ?
 C37 C38 H38C 109.5 . . ?
 H38A C38 H38B 109.5 . . ?
 H38A C38 H38C 109.5 . . ?
 H38B C38 H38C 109.5 . . ?
 C5S C6S H6SA 109.5 . . ?
 C5S C6S H6SB 109.5 . . ?
 C5S C6S H6SC 109.5 . . ?
 H6SA C6S H6SB 109.5 . . ?
 H6SA C6S H6SC 109.5 . . ?
 H6SB C6S H6SC 109.5 . . ?
 C34 C35 H35A 109.5 . . ?
 C34 C35 H35B 109.5 . . ?
 C34 C35 H35C 109.5 . . ?
 H35A C35 H35B 109.5 . . ?
 H35A C35 H35C 109.5 . . ?
 H35B C35 H35C 109.5 . . ?
 C46 C47 H47A 109.5 . . ?
 C46 C47 H47B 109.5 . . ?
 C46 C47 H47C 109.5 . . ?
 H47A C47 H47B 109.5 . . ?
 H47A C47 H47C 109.5 . . ?
 H47B C47 H47C 109.5 . . ?
 C40 C41 H41A 109.5 . . ?
 C40 C41 H41B 109.5 . . ?
 C40 C41 H41C 109.5 . . ?
 H41A C41 H41B 109.5 . . ?
 H41A C41 H41C 109.5 . . ?
 H41B C41 H41C 109.5 . . ?
 O1S C1S H1SA 110.0 . . ?
 O1S C1S H1SB 110.0 . . ?
 O1S C1S C2S 108.43(17) . . ?
 H1SA C1S H1SB 108.4 . . ?
 C2S C1S H1SA 110.0 . . ?
 C2S C1S H1SB 110.0 . . ?
 O1S C3S H3SA 109.9 . . ?
 O1S C3S H3SB 109.9 . . ?
 O1S C3S C4S 109.06(18) . . ?
 H3SA C3S H3SB 108.3 . . ?
 C4S C3S H3SA 109.9 . . ?
 C4S C3S H3SB 109.9 . . ?
 C7S C8S H8SA 109.5 . . ?
 C7S C8S H8SB 109.5 . . ?
 C7S C8S H8SC 109.5 . . ?
 H8SA C8S H8SB 109.5 . . ?
 H8SA C8S H8SC 109.5 . . ?
 H8SB C8S H8SC 109.5 . . ?
 C1S C2S H2SA 109.5 . . ?
 C1S C2S H2SB 109.5 . . ?
 C1S C2S H2SC 109.5 . . ?
 H2SA C2S H2SB 109.5 . . ?
 H2SA C2S H2SC 109.5 . . ?
 H2SB C2S H2SC 109.5 . . ?
 C3S C4S H4SA 109.5 . . ?
 C3S C4S H4SB 109.5 . . ?
 C3S C4S H4SC 109.5 . . ?
 H4SA C4S H4SB 109.5 . . ?
 H4SA C4S H4SC 109.5 . . ?
 H4SB C4S H4SC 109.5 . . ?

loop_
  _geom_torsion_atom_site_label_1
  _geom_torsion_atom_site_label_2
  _geom_torsion_atom_site_label_3
  _geom_torsion_atom_site_label_4
  _geom_torsion
  _geom_torsion_site_symmetry_1
  _geom_torsion_site_symmetry_2
  _geom_torsion_site_symmetry_3
  _geom_torsion_site_symmetry_4
  _geom_torsion_publ_flag
 N2 C27 C28 C29 -178.64(15) . . . . ?
 N2 C27 C28 C42 -0.9(2) . . . . ?
 C6 C5 C4 C3 -0.3(2) . . . . ?
 C6 C7 C2 N1 178.79(14) . . . . ?
 C6 C7 C2 C3 -1.7(2) . . . . ?
 C3 C17 C23 C22 177.41(14) . . . . ?
 C3 C17 C23 C24 -1.0(2) . . . . ?
 C8 C9 C11 C12 0.8(2) . . . . ?
 C8 C7 C2 N1 -3.2(2) . . . . ?
 C8 C7 C2 C3 176.23(15) . . . . ?
 C8 C15 C14 C12 1.6(2) . . . . ?
 C5 C6 C7 C8 -177.74(15) . . . . ?
 C5 C6 C7 C2 0.3(2) . . . . ?
 C5 C5 C4 C3 -179.74(18) 2_667 . . . ?
 C9 C8 C7 C6 107.13(17) . . . . ?
 C9 C8 C7 C2 -70.8(2) . . . . ?
 C9 C8 C15 C14 -1.7(2) . . . . ?
 C9 C8 C15 C16 177.80(15) . . . . ?
 C7 C6 C5 C5 -179.88(18) . . . 2_667 ?
 C7 C6 C5 C4 0.7(2) . . . . ?
 C7 C8 C9 C11 -176.26(14) . . . . ?
 C7 C8 C9 C10 2.7(2) . . . . ?
 C7 C8 C15 C14 175.09(14) . . . . ?
 C7 C8 C15 C16 -5.4(2) . . . . ?
 C32 C27 C28 C29 0.6(2) . . . . ?
 C32 C27 C28 C42 178.29(16) . . . . ?
 C32 C31 C30 C30 -178.19(19) . . . 2_666 ?
 C32 C31 C30 C29 1.0(2) . . . . ?
 C32 C33 C34 C36 -177.52(15) . . . . ?
 C32 C33 C34 C35 2.7(3) . . . . ?
 C32 C33 C40 C39 176.84(15) . . . . ?
 C32 C33 C40 C41 -2.8(2) . . . . ?
 C18 C17 C23 C22 1.0(2) . . . . ?
 C18 C17 C23 C24 -177.45(15) . . . . ?
 C17 C3 C2 N1 2.7(2) . . . . ?
 C17 C3 C2 C7 -176.79(15) . . . . ?
 C17 C3 C4 C5 177.89(15) . . . . ?
 C17 C18 C20 C21 1.2(2) . . . . ?
 C17 C23 C22 C21 0.6(2) . . . . ?
 C27 C32 C31 C30 -1.2(2) . . . . ?
 C27 C32 C33 C34 -94.5(2) . . . . ?
 C27 C32 C33 C40 88.8(2) . . . . ?
 C27 C28 C29 C30 -0.8(2) . . . . ?
 C27 C28 C42 C43 -80.8(2) . . . . ?
 C27 C28 C42 C010 102.3(2) . . . . ?
 C15 C8 C9 C11 0.6(2) . . . . ?
 C15 C8 C9 C10 179.50(14) . . . . ?
 C15 C8 C7 C6 -69.7(2) . . . . ?
 C15 C8 C7 C2 112.36(18) . . . . ?
 C15 C14 C12 C11 -0.2(2) . . . . ?
 C15 C14 C12 C13 179.56(15) . . . . ?
 C28 C42 C010 C48 177.93(15) . . . . ?
 C28 C42 C010 C49 -1.8(2) . . . . ?
 C2 C3 C17 C18 -108.47(18) . . . . ?
 C2 C3 C17 C23 75.1(2) . . . . ?
 C2 C3 C4 C5 -1.0(2) . . . . ?
 C31 C32 C27 N2 179.60(15) . . . . ?
 C31 C32 C27 C28 0.4(2) . . . . ?
 C31 C32 C33 C34 87.1(2) . . . . ?
 C31 C32 C33 C40 -89.7(2) . . . . ?
 C31 C30 C29 C28 0.0(2) . . . . ?
 C14 C12 C11 C9 -1.0(2) . . . . ?
 C30 C30 C29 C28 179.21(18) 2_666 . . . ?
 C33 C32 C27 N2 1.1(2) . . . . ?
 C33 C32 C27 C28 -178.11(15) . . . . ?
 C33 C32 C31 C30 177.35(15) . . . . ?
 C33 C34 C36 C37 0.5(3) . . . . ?
 C33 C40 C39 C37 0.9(3) . . . . ?
 C43 C42 C010 C48 1.0(2) . . . . ?
 C43 C42 C010 C49 -178.73(16) . . . . ?
 C43 C45 C46 C48 1.5(3) . . . . ?
 C43 C45 C46 C47 -177.14(17) . . . . ?
 C29 C28 C42 C43 96.88(19) . . . . ?
 C29 C28 C42 C010 -80.1(2) . . . . ?
 C34 C33 C40 C39 0.1(2) . . . . ?
 C34 C33 C40 C41 -179.59(17) . . . . ?
 C34 C36 C37 C39 0.4(3) . . . . ?
 C34 C36 C37 C38 -177.19(17) . . . . ?
 C36 C37 C39 C40 -1.2(3) . . . . ?
 C42 C28 C29 C30 -178.55(15) . . . . ?
 C42 C43 C45 C46 -0.8(3) . . . . ?
 C42 C010 C48 C46 -0.3(3) . . . . ?
 C40 C33 C34 C36 -0.8(2) . . . . ?
 C40 C33 C34 C35 179.41(17) . . . . ?
 C4 C3 C17 C18 72.7(2) . . . . ?
 C4 C3 C17 C23 -103.78(18) . . . . ?
 C4 C3 C2 N1 -178.44(15) . . . . ?
 C4 C3 C2 C7 2.1(2) . . . . ?
 C22 C21 C20 C18 0.3(2) . . . . ?
 C45 C43 C42 C28 -177.43(15) . . . . ?
 C45 C43 C42 C010 -0.5(2) . . . . ?
 C45 C46 C48 C010 -0.9(3) . . . . ?
 C20 C18 C17 C3 -178.26(15) . . . . ?
 C20 C18 C17 C23 -1.8(2) . . . . ?
 C20 C21 C22 C23 -1.2(2) . . . . ?
 C10 C9 C11 C12 -178.13(15) . . . . ?
 C19 C18 C17 C3 0.3(2) . . . . ?
 C19 C18 C17 C23 176.70(15) . . . . ?
 C19 C18 C20 C21 -177.38(16) . . . . ?
 C16 C15 C14 C12 -177.99(15) . . . . ?
 C24 C23 C22 C21 179.04(16) . . . . ?
 C5S O2S C7S C8S -178.74(16) . . . . ?
 C13 C12 C11 C9 179.24(15) . . . . ?
 C25 C21 C22 C23 178.57(16) . . . . ?
 C25 C21 C20 C18 -179.48(16) . . . . ?
 C44 C43 C42 C28 1.5(2) . . . . ?
 C44 C43 C42 C010 178.50(16) . . . . ?
 C44 C43 C45 C46 -179.80(17) . . . . ?
 C49 C010 C48 C46 179.44(17) . . . . ?
 C7S O2S C5S C6S -178.80(15) . . . . ?
 C38 C37 C39 C40 176.42(17) . . . . ?
 C35 C34 C36 C37 -179.65(17) . . . . ?
 C47 C46 C48 C010 177.71(17) . . . . ?
 C41 C40 C39 C37 -179.39(18) . . . . ?
 C1S O1S C3S C4S 179.82(17) . . . . ?
 C3S O1S C1S C2S -177.70(17) . . . . ?

_shelx_res_file
;
    jfig1150_p-1_a.res created by SHELXL-2014/7

TITL JFig1150_P-1_a.res in P-1
REM Old TITL JFig1150_P-1 in P-1
REM SHELXT solution in P-1
REM R1 0.161, Rweak 0.010, Alpha 0.037, Orientation as input
REM Formula found by SHELXT: C58 N3 O
CELL 0.71073 12.6957 13.7455 15.3667 104.296 90.301 104.17
ZERR 2 0.0008 0.0007 0.0009 0.002 0.002 0.002
LATT 1
SFAC C H N O
UNIT 116 136 4 4

L.S. 10
PLAN  5
TEMP -173.15
BOND $H
MORE -1
CONF
fmap 2
acta 52
OMIT 0 0 1
OMIT 1 0 0
OMIT -1 0 1
OMIT 0 1 0
OMIT -1 -1 1
REM <olex2.extras>
REM <HklSrc "%.\\JFig1150_P-1_a.hkl">
REM </olex2.extras>

WGHT    0.043600    1.029500
FVAR       0.47917
O2S   4    0.151408    0.479475    0.919398    11.00000    0.02808    0.02466 =
         0.03016    0.00958   -0.00271    0.00643
N1    3    0.608094    0.828185    0.907646    11.00000    0.01433    0.01386 =
         0.02194    0.00650    0.00164    0.00240
O1S   4    0.586299    0.829788    0.511548    11.00000    0.03220    0.02653 =
         0.05091    0.02046   -0.00276    0.00280
N2    3    0.858321    0.531540    0.647089    11.00000    0.01806    0.01507 =
         0.02583    0.00739   -0.00343    0.00254
C6    1    0.441594    0.583342    0.941459    11.00000    0.01056    0.01232 =
         0.01863    0.00421    0.00094    0.00045
AFIX  43
H6    2    0.368984    0.541491    0.928339    11.00000   -1.20000
AFIX   0
C3    1    0.654814    0.706759    0.981721    11.00000    0.01429    0.01277 =
         0.01956    0.00472    0.00055    0.00242
C8    1    0.384730    0.709068    0.870301    11.00000    0.01237    0.01278 =
         0.02257    0.01112    0.00347    0.00145
C5    1    0.516521    0.549910    0.986492    11.00000    0.01385    0.01104 =
         0.01605    0.00400    0.00154    0.00274
C9    1    0.344791    0.792202    0.918114    11.00000    0.01554    0.01348 =
         0.02291    0.00916    0.00446    0.00260
C7    1    0.469775    0.675661    0.915278    11.00000    0.01368    0.01164 =
         0.01636    0.00305    0.00134    0.00395

C32   1    0.740488    0.605195    0.573124    11.00000    0.01635    0.01342 =
         0.02002    0.00492    0.00010    0.00295
C18   1    0.856204    0.743380    0.962853    11.00000    0.01719    0.01559 =
         0.02432    0.01099   -0.00156    0.00250
C17   1    0.768776    0.773566    1.007212    11.00000    0.01535    0.01219 =
         0.02261    0.01034   -0.00239   -0.00065
C27   1    0.756091    0.523364    0.606375    11.00000    0.01591    0.01818 =
         0.01802    0.00564   -0.00204    0.00526
C15   1    0.341458    0.654274    0.782529    11.00000    0.01660    0.01445 =
         0.02141    0.00969    0.00336    0.00318
C28   1    0.673140    0.432783    0.599341    11.00000    0.01892    0.01475 =
         0.01824    0.00630   -0.00025    0.00435
C2    1    0.577585    0.735477    0.935198    11.00000    0.01784    0.01041 =
         0.01955    0.00701    0.00304    0.00334
C31   1    0.638743    0.594637    0.532694    11.00000    0.01766    0.01422 =
         0.02115    0.00774   -0.00047    0.00526
AFIX  43
H31   2    0.626530    0.650124    0.510832    11.00000   -1.20000
AFIX   0

C14   1    0.256476    0.682044    0.744923    11.00000    0.02016    0.01938 =
         0.02021    0.01045    0.00009    0.00295
AFIX  43
H14   2    0.225866    0.644019    0.686198    11.00000   -1.20000
AFIX   0

C30   1    0.553652    0.505262    0.523019    11.00000    0.01651    0.01401 =
         0.01783    0.00543    0.00083    0.00445
C33   1    0.829740    0.701260    0.577767    11.00000    0.01414    0.01489 =
         0.02383    0.00946   -0.00437    0.00247
C12   1    0.215244    0.763893    0.790998    11.00000    0.01791    0.01872 =
         0.02790    0.01571    0.00250    0.00399
C21   1    0.982418    0.894864    1.059581    11.00000    0.01801    0.02122 =
         0.02521    0.01414   -0.00351   -0.00225
C23   1    0.787508    0.863146    1.078998    11.00000    0.01998    0.01610 =
         0.02407    0.00997   -0.00099    0.00037
C43   1    0.741680    0.273266    0.578334    11.00000    0.02012    0.01832 =
         0.02304    0.00857   -0.00133    0.00271
C29   1    0.573413    0.425346    0.557139    11.00000    0.01710    0.01334 =
         0.02148    0.00711    0.00050    0.00114
AFIX  43
H29   2    0.516677    0.363982    0.551213    11.00000   -1.20000
AFIX   0
C34   1    0.840048    0.789167    0.649562    11.00000    0.02019    0.01622 =
         0.02786    0.00734   -0.00233    0.00446
C36   1    0.921619    0.878469    0.649611    11.00000    0.02506    0.01286 =
         0.03279    0.00222   -0.00607    0.00395
AFIX  43
H36   2    0.929459    0.938236    0.698435    11.00000   -1.20000
AFIX   0
C42   1    0.690430    0.343690    0.632615    11.00000    0.01504    0.01417 =
         0.02332    0.00702   -0.00418    0.00138
C40   1    0.898853    0.703566    0.507258    11.00000    0.01746    0.02172 =
         0.02597    0.00816   -0.00138    0.00212

C4    1    0.622570    0.613249    1.006022    11.00000    0.01566    0.01499 =
         0.02173    0.00808   -0.00137    0.00419
AFIX  43
H4    2    0.674302    0.591843    1.036849    11.00000   -1.20000
AFIX   0
C11   1    0.261091    0.818227    0.877003    11.00000    0.01847    0.01401 =
         0.03067    0.01109    0.00639    0.00708
AFIX  43
H11   2    0.234534    0.874940    0.908808    11.00000   -1.20000
AFIX   0
C22   1    0.894249    0.921799    1.104001    11.00000    0.02541    0.01546 =
         0.02299    0.00662   -0.00455   -0.00170
AFIX  43
H22   2    0.907354    0.982083    1.152893    11.00000   -1.20000
AFIX   0

C45   1    0.753622    0.188488    0.607726    11.00000    0.02543    0.01931 =
         0.03137    0.00837    0.00134    0.00916
AFIX  43
H45   2    0.787400    0.140249    0.570720    11.00000   -1.20000
AFIX   0

C20   1    0.961643    0.805453    0.989537    11.00000    0.01493    0.02346 =
         0.02700    0.01319    0.00165    0.00333
AFIX  43
H20   2    1.020923    0.785843    0.958786    11.00000   -1.20000
AFIX   0

C010  1    0.651468    0.327939    0.714559    11.00000    0.01904    0.01924 =
         0.02248    0.00784   -0.00302    0.00096
C46   1    0.717903    0.171899    0.689254    11.00000    0.02607    0.01995 =
         0.03066    0.01356   -0.00496    0.00369
C10   1    0.388800    0.852187    1.012805    11.00000    0.02415    0.01987 =
         0.02631    0.00483    0.00185    0.00796
AFIX 137
H10A  2    0.407738    0.805058    1.045243    11.00000   -1.50000
H10B  2    0.333300    0.883397    1.044011    11.00000   -1.50000
H10C  2    0.453907    0.907015    1.010582    11.00000   -1.50000
AFIX   0

C37   1    0.991007    0.882648    0.581180    11.00000    0.01888    0.01927 =
         0.03603    0.01523   -0.00440    0.00194
C19   1    0.839363    0.644831    0.889004    11.00000    0.01993    0.02257 =
         0.03720    0.00665    0.00091    0.00456
AFIX 137
H19A  2    0.826371    0.585292    0.915418    11.00000   -1.50000
H19B  2    0.904413    0.647068    0.854737    11.00000   -1.50000
H19C  2    0.776338    0.637961    0.848768    11.00000   -1.50000
AFIX   0
C16   1    0.385681    0.567157    0.728540    11.00000    0.02677    0.02540 =
         0.02170    0.00352   -0.00154    0.01083
AFIX 137
H16A  2    0.465454    0.588070    0.734809    11.00000   -1.50000
H16B  2    0.360825    0.551710    0.664971    11.00000   -1.50000
H16C  2    0.359458    0.505160    0.750806    11.00000   -1.50000
AFIX   0

C48   1    0.666474    0.241920    0.741222    11.00000    0.02978    0.02611 =
         0.02290    0.01449   -0.00051    0.00328
AFIX  43
H48   2    0.640587    0.231004    0.796817    11.00000   -1.20000
AFIX   0
C39   1    0.978146    0.795051    0.510037    11.00000    0.01962    0.03036 =
         0.03075    0.01464    0.00284    0.00167
AFIX  43
H39   2    1.024545    0.797351    0.461886    11.00000   -1.20000
AFIX   0

C24   1    0.694943    0.894850    1.130372    11.00000    0.02596    0.02341 =
         0.03043    0.00299    0.00070    0.00114
AFIX 137
H24A  2    0.651159    0.919893    1.092255    11.00000   -1.50000
H24B  2    0.724526    0.950293    1.184662    11.00000   -1.50000
H24C  2    0.649129    0.834920    1.147509    11.00000   -1.50000
AFIX   0

C5S   1    0.121290    0.575237    0.949958    11.00000    0.02262    0.02509 =
         0.04328    0.01900    0.00554    0.00577
AFIX  23
H5SA  2    0.041136    0.561609    0.951418    11.00000   -1.20000
H5SB  2    0.145127    0.619571    0.908178    11.00000   -1.20000
AFIX   0

C13   1    0.123760    0.792890    0.748536    11.00000    0.02366    0.02905 =
         0.03563    0.01570   -0.00120    0.01005
AFIX 137
H13A  2    0.153453    0.854547    0.726577    11.00000   -1.50000
H13B  2    0.071451    0.807815    0.793417    11.00000   -1.50000
H13C  2    0.087012    0.735125    0.698062    11.00000   -1.50000
AFIX   0
C25   1    1.097002    0.960988    1.086523    11.00000    0.02116    0.03172 =
         0.03387    0.01300   -0.00472   -0.00320
AFIX 137
H25A  2    1.113503    1.014159    1.052773    11.00000   -1.50000
H25B  2    1.148299    0.917226    1.073140    11.00000   -1.50000
H25C  2    1.103664    0.994551    1.151166    11.00000   -1.50000
AFIX   0
C1    1    0.629853    0.903629    0.883174    11.00000    0.02639    0.01821 =
         0.03032    0.00898    0.00540    0.00472

C44   1    0.781469    0.288006    0.488968    11.00000    0.03823    0.02727 =
         0.02842    0.01254    0.00737    0.01389
AFIX 137
H44A  2    0.724935    0.304340    0.455599    11.00000   -1.50000
H44B  2    0.797802    0.224070    0.454086    11.00000   -1.50000
H44C  2    0.847514    0.345181    0.499176    11.00000   -1.50000
AFIX   0
C49   1    0.594041    0.400829    0.773512    11.00000    0.03675    0.02943 =
         0.02764    0.00934    0.00641    0.01059
AFIX 137
H49A  2    0.634123    0.472727    0.777953    11.00000   -1.50000
H49B  2    0.590658    0.388491    0.833702    11.00000   -1.50000
H49C  2    0.520008    0.388655    0.747207    11.00000   -1.50000
AFIX   0

C7S   1    0.105044    0.425539    0.830830    11.00000    0.03296    0.03183 =
         0.02861    0.01276   -0.00376    0.00176
AFIX  23
H7SA  2    0.131418    0.468292    0.788305    11.00000   -1.20000
H7SB  2    0.024705    0.411850    0.829547    11.00000   -1.20000
AFIX   0

C26   1    0.942652    0.537736    0.680884    11.00000    0.02827    0.02697 =
         0.03874    0.00622   -0.00736    0.00788
C38   1    1.081823    0.979231    0.585610    11.00000    0.02792    0.02580 =
         0.05164    0.01673   -0.00486   -0.00339
AFIX 137
H38A  2    1.061263    1.040123    0.622152    11.00000   -1.50000
H38B  2    1.094138    0.987521    0.524652    11.00000   -1.50000
H38C  2    1.148732    0.972439    0.612886    11.00000   -1.50000
AFIX   0

C6S   1    0.174256    0.629874    1.042747    11.00000    0.03168    0.02677 =
         0.04137    0.01004    0.00775    0.00733
AFIX 137
H6SA  2    0.253530    0.642841    1.040930    11.00000   -1.50000
H6SB  2    0.149081    0.586305    1.084075    11.00000   -1.50000
H6SC  2    0.154661    0.696071    1.063682    11.00000   -1.50000
AFIX   0

C35   1    0.766526    0.789508    0.725749    11.00000    0.04161    0.02652 =
         0.03997    0.00132    0.01153    0.00115
AFIX 137
H35A  2    0.697383    0.737530    0.704948    11.00000   -1.50000
H35B  2    0.752763    0.858334    0.746738    11.00000   -1.50000
H35C  2    0.801428    0.772883    0.775304    11.00000   -1.50000
AFIX   0
C47   1    0.737249    0.081299    0.720622    11.00000    0.05360    0.03128 =
         0.05031    0.02521   -0.00249    0.01407
AFIX 137
H47A  2    0.734207    0.022664    0.668382    11.00000   -1.50000
H47B  2    0.680986    0.060870    0.760709    11.00000   -1.50000
H47C  2    0.809088    0.101672    0.753094    11.00000   -1.50000
AFIX   0
C41   1    0.888330    0.609901    0.429253    11.00000    0.03792    0.03489 =
         0.03293    0.00101    0.01162   -0.00232
AFIX 137
H41A  2    0.893537    0.550382    0.451826    11.00000   -1.50000
H41B  2    0.946897    0.624165    0.389335    11.00000   -1.50000
H41C  2    0.817701    0.594154    0.395795    11.00000   -1.50000
AFIX   0

C1S   1    0.612150    0.862198    0.431782    11.00000    0.03815    0.03073 =
         0.05553    0.02373   -0.00592   -0.00238
AFIX  23
H1SA  2    0.649087    0.937183    0.447047    11.00000   -1.20000
H1SB  2    0.544738    0.850525    0.393802    11.00000   -1.20000
AFIX   0
C3S   1    0.512966    0.881461    0.561971    11.00000    0.03520    0.03587 =
         0.05665    0.01200   -0.00666    0.00490
AFIX  23
H3SA  2    0.444381    0.867693    0.524855    11.00000   -1.20000
H3SB  2    0.545658    0.957313    0.579325    11.00000   -1.20000
AFIX   0

C8S   1    0.137479    0.324882    0.803469    11.00000    0.06967    0.03437 =
         0.03371    0.00864   -0.01117    0.01180
AFIX 137
H8SA  2    0.103562    0.285887    0.743518    11.00000   -1.50000
H8SB  2    0.113175    0.283949    0.846925    11.00000   -1.50000
H8SC  2    0.216873    0.339106    0.802107    11.00000   -1.50000
AFIX   0

C2S   1    0.685774    0.800499    0.381708    11.00000    0.05061    0.03648 =
         0.06783    0.02198    0.00988    0.00001
AFIX 137
H2SA  2    0.751338    0.810972    0.420368    11.00000   -1.50000
H2SB  2    0.706451    0.823628    0.327347    11.00000   -1.50000
H2SC  2    0.647546    0.726663    0.364756    11.00000   -1.50000
AFIX   0
C4S   1    0.489498    0.842390    0.645279    11.00000    0.05858    0.05725 =
         0.05497    0.01699    0.00306    0.00249
AFIX 137
H4SA  2    0.556956    0.860092    0.683540    11.00000   -1.50000
H4SB  2    0.460232    0.766862    0.627750    11.00000   -1.50000
H4SC  2    0.436078    0.874865    0.678601    11.00000   -1.50000
AFIX   0
HKLF 4

REM  JFig1150_P-1_a.res in P-1
REM R1 =  0.0442 for    6478 Fo > 4sig(Fo)  and  0.0774 for all    9209 data
REM    575 parameters refined using      0 restraints

END

WGHT      0.0436      1.0295

REM Highest difference peak  0.288,  deepest hole -0.219,  1-sigma level  0.040
Q1    1   1.1402  0.9668  1.0325  11.00000  0.05    0.29
Q2    1   1.0952  1.0363  1.1140  11.00000  0.05    0.25
Q3    1   0.7137  0.7424  1.0003  11.00000  0.05    0.22
Q4    1   0.7343  0.7184  0.7384  11.00000  0.05    0.21
Q5    1   0.5000  0.5000  1.0000  10.50000  0.05    0.20
;
_shelx_res_checksum               4215
_shelx_hkl_file
;
  -1   0   0   74.69    3.40
   1   0   0   48.60    3.30
   1   0   0   60.99    3.40
  -2   0   0  775.42   33.10
  -2   0   0  769.52   33.10
  -2   0   0  765.92   33.20
  -2   0   0  792.52   33.00
  -2   0   0  741.03   33.00
  -2   0   0  828.12   33.10
  -2   0   0  753.52   33.10
  -2   0   0  790.12   33.00
   2   0   0  773.92   33.10
   2   0   0  747.93   33.10
   2   0   0  765.52   33.20
   2   0   0  732.63   33.00
   2   0   0  778.52   33.20
   2   0   0  777.82   33.10
   2   0   0  822.62   33.00
   2   0   0  751.32   33.10
  -3   0   0   -3.90    3.10
  -3   0   0   -0.10    3.50
  -3   0   0    0.70    2.90
  -3   0   0   -1.20    3.60
  -3   0   0    2.50    3.60
  -3   0   0   -0.40    3.80
  -3   0   0   -1.30    3.40
  -3   0   0    1.80    3.90
  -3   0   0    1.40    3.80
   3   0   0   -3.70    4.20
   3   0   0   -1.00    3.60
   3   0   0    1.60    3.30
   3   0   0   -1.20    3.10
   3   0   0    1.50    3.20
   3   0   0   -0.30    3.20
   3   0   0    2.60    3.60
   3   0   0    4.10    4.00
  -4   0   0 1234.48   54.69
  -4   0   0 1327.37   54.89
  -4   0   0 1250.67   54.89
  -4   0   0 1279.27   54.89
  -4   0   0 1297.97   55.19
  -4   0   0 1288.57   54.79
  -4   0   0 1280.67   55.19
  -4   0   0 1301.07   54.89
  -4   0   0 1254.77   54.59
   4   0   0 1216.48   54.99
   4   0   0 1284.07   54.99
   4   0   0 1265.67   54.99
   4   0   0 1371.76   55.19
   4   0   0 1308.17   54.89
   4   0   0 1233.28   54.89
   4   0   0 1255.57   54.99
   4   0   0 1293.07   54.89
  -5   0   0   -0.80    3.70
  -5   0   0    0.20    4.10
  -5   0   0    4.40    5.00
  -5   0   0   -0.50    4.40
  -5   0   0   -0.90    3.50
  -5   0   0    0.00    4.00
  -5   0   0    0.30    4.10
  -5   0   0    2.90    4.30
  -5   0   0   -1.00    3.90
   5   0   0   -2.40    4.60
   5   0   0    0.40    4.60
   5   0   0   -1.10    4.50
   5   0   0    1.80    4.60
   5   0   0    0.50    3.80
   5   0   0   -2.00    4.20
   5   0   0   -3.00    4.60
   5   0   0   -0.50    3.70
  -6   0   0   41.70    5.90
  -6   0   0   24.80    5.10
  -6   0   0   31.00    5.50
  -6   0   0   53.39    6.70
  -6   0   0   39.40    5.80
  -6   0   0   37.40    5.20
  -6   0   0   38.30    5.70
  -6   0   0   29.00    5.50
  -6   0   0   37.30    6.10
   6   0   0   38.60    5.90
   6   0   0   36.10    5.60
   6   0   0   31.20    5.50
   6   0   0   38.50    6.20
   6   0   0   39.90    6.00
   6   0   0   29.50    5.50
   6   0   0   35.20    5.80
  -7   0   0   -0.10    5.00
  -7   0   0   -2.60    3.90
  -7   0   0    4.00    5.10
  -7   0   0   -0.10    3.80
  -7   0   0   -0.20    4.60
  -7   0   0    0.00    3.90
  -7   0   0   -4.20    4.80
  -7   0   0    0.90    4.40
  -7   0   0   -0.50    5.60
   7   0   0    5.50    5.00
   7   0   0   -5.80    5.30
   7   0   0    2.00    4.40
   7   0   0   -4.20    4.50
   7   0   0   -0.70    5.10
   7   0   0    1.40    4.30
   7   0   0    4.60    5.20
  -8   0   0  616.54   29.10
  -8   0   0  559.04   28.70
  -8   0   0  593.74   28.40
  -8   0   0  633.74   29.30
  -8   0   0  558.34   29.10
  -8   0   0  593.54   28.70
  -8   0   0  583.44   28.50
  -8   0   0  610.64   28.80
   8   0   0  571.34   28.90
   8   0   0  599.34   29.00
   8   0   0  593.34   29.10
   8   0   0  588.44   29.10
   8   0   0  572.14   29.20
   8   0   0  591.44   29.10
   8   0   0  593.44   29.20
  -9   0   0    6.90    5.40
  -9   0   0   15.50    5.60
  -9   0   0   14.20    6.20
  -9   0   0   10.40    5.50
  -9   0   0   20.70    5.30
  -9   0   0   14.90    6.00
  -9   0   0   23.80    6.40
  -9   0   0    3.90    5.50
   9   0   0   12.90    5.90
   9   0   0   13.70    6.60
   9   0   0   24.00    6.70
   9   0   0    5.30    6.00
   9   0   0   14.20    5.80
   9   0   0   27.30    7.00
   9   0   0   16.20    5.70
 -10   0   0   38.90    7.80
 -10   0   0   50.09    7.30
 -10   0   0   56.69    7.70
 -10   0   0   46.80    8.10
 -10   0   0   50.79    7.90
 -10   0   0   45.80    8.00
  10   0   0   45.30    8.50
  10   0   0   67.39    9.10
  10   0   0   40.70    7.80
  10   0   0   47.10    8.50
  10   0   0   48.70    8.30
  10   0   0   48.10    8.60
 -11   0   0    4.20    5.00
 -11   0   0    4.90    6.00
 -11   0   0   -2.10    5.90
 -11   0   0    5.80    5.80
  11   0   0    7.30    7.20
  11   0   0    2.30    6.60
  11   0   0    6.50    7.50
  11   0   0    1.70    6.00
  11   0   0    0.30    6.70
 -12   0   0   41.80    7.50
 -12   0   0   49.80    9.50
 -12   0   0   58.29   10.10
 -12   0   0   56.79    8.00
  12   0   0   57.69   10.30
  12   0   0   40.70    8.80
  12   0   0   56.49   11.00
  12   0   0   54.49   10.10
 -13   0   0    4.50    7.80
 -13   0   0   11.00    7.60
 -13   0   0   -5.70    5.80
  13   0   0    3.00    7.90
  13   0   0   -2.80    8.60
  13   0   0    7.90    8.00
  13   0   0    6.60    7.30
 -14   0   0   13.70    8.90
 -14   0   0    0.00    7.30
  14   0   0   -4.40    8.00
  14   0   0    6.10    8.50
  14   0   0   -0.40    9.30
  14   0   0    7.40    9.40
  15  -1   0   55.89   12.90
  14  -1   0  103.39   13.60
  14  -1   0  133.79   14.20
  14  -1   0  107.69   13.90
  14  -1   0  107.69   14.30
 -14   1   0  104.89   14.00
  13  -1   0    7.60    7.40
  13  -1   0   10.40    8.70
  13  -1   0   11.20    8.00
  13  -1   0    4.70    8.90
 -13   1   0   18.30    7.80
 -13   1   0   22.20    7.40
 -13   1   0    6.70    8.60
  12  -1   0   -3.50    6.30
  12  -1   0    3.90    8.30
  12  -1   0    7.50    7.00
  12  -1   0   -1.10    7.50
  12  -1   0    3.10    7.40
 -12   1   0    6.70    7.60
 -12   1   0    8.60    6.70
 -12   1   0    7.70    6.20
 -12   1   0   12.60    6.70
  11  -1   0   55.69    9.10
  11  -1   0   52.89    8.80
  11  -1   0   42.70    9.30
  11  -1   0   47.00    8.80
  11  -1   0   35.00    9.00
 -11   1   0   51.19    8.20
 -11   1   0   47.80    8.10
 -11   1   0   39.30    8.00
 -11   1   0   52.79    9.00
 -11   1   0   27.50    7.40
  10  -1   0  390.66   21.70
  10  -1   0  348.87   21.00
  10  -1   0  334.87   21.20
  10  -1   0  368.46   22.10
  10  -1   0  378.06   23.70
  10  -1   0  352.36   21.30
 -10   1   0  385.06   21.60
 -10   1   0  369.56   21.70
 -10   1   0  368.46   20.80
 -10   1   0  364.46   21.10
 -10   1   0  369.46   21.20
 -10   1   0  345.77   21.20
 -10   1   0  418.36   21.90
   9  -1   0    8.50    5.50
   9  -1   0   14.00    5.90
   9  -1   0    8.10    5.70
   9  -1   0    4.70    5.00
   9  -1   0   14.40    6.30
   9  -1   0    4.40    6.00
   9  -1   0   11.70    6.70
  -9   1   0    9.70    5.70
  -9   1   0   12.90    6.10
  -9   1   0   11.40    5.70
  -9   1   0   11.80    5.10
  -9   1   0   21.90    7.20
  -9   1   0   10.50    5.00
  -9   1   0    5.30    5.80
  -9   1   0   19.60    5.90
  -9   1   0    9.30    5.80
   8  -1   0  116.19   10.60
   8  -1   0  121.19   10.30
   8  -1   0  144.99   11.60
   8  -1   0  144.39   11.30
   8  -1   0  123.19   10.80
   8  -1   0  132.29   11.40
   8  -1   0  132.19   11.40
  -8   1   0  118.89   10.30
  -8   1   0  126.49   12.10
  -8   1   0  136.09   10.60
  -8   1   0  116.49   11.10
  -8   1   0  118.59   11.20
  -8   1   0  135.19   11.10
  -8   1   0  129.59   10.40
  -8   1   0  120.69   10.40
  -8   1   0  133.59   10.80
   7  -1   0   41.60    6.70
   7  -1   0   49.99    6.70
   7  -1   0   46.40    6.60
   7  -1   0   40.00    6.10
   7  -1   0   55.49    7.10
   7  -1   0   39.20    6.40
   7  -1   0   45.40    6.70
  -7   1   0   45.10    6.10
  -7   1   0   50.09    6.30
  -7   1   0   35.70    6.10
  -7   1   0   45.60    6.80
  -7   1   0   41.70    6.60
  -7   1   0   38.40    6.50
  -7   1   0   45.50    6.00
  -7   1   0   44.00    6.10
  -7   1   0   38.70    6.40
   6  -1   0   11.50    5.10
   6  -1   0    9.10    5.10
   6  -1   0    4.80    4.40
   6  -1   0    6.60    5.00
   6  -1   0   10.20    4.10
   6  -1   0   10.20    4.70
   6  -1   0   12.60    4.70
  -6   1   0    8.80    4.30
  -6   1   0   -0.10    5.00
  -6   1   0    5.10    4.50
  -6   1   0    7.60    4.50
  -6   1   0   11.20    5.00
  -6   1   0    7.20    4.80
  -6   1   0    2.10    4.70
  -6   1   0    7.10    4.50
  -6   1   0   11.10    4.30
   5  -1   0  107.59    9.40
   5  -1   0  109.69    8.90
   5  -1   0  107.69    9.10
   5  -1   0  113.19    9.20
   5  -1   0  113.49    8.50
   5  -1   0  118.89    9.10
   5  -1   0  113.69    9.10
  -5   1   0  116.49    9.40
  -5   1   0  129.89   10.10
  -5   1   0  110.69    9.00
  -5   1   0  118.79    9.20
  -5   1   0  128.59   10.20
  -5   1   0  131.69    9.60
  -5   1   0  124.49    8.70
  -5   1   0  113.99    9.20
   4  -1   0  509.15   22.70
   4  -1   0  464.05   22.60
   4  -1   0  494.85   22.80
   4  -1   0  485.15   22.70
   4  -1   0  475.35   23.00
   4  -1   0  480.85   23.10
  -4   1   0  476.35   22.70
  -4   1   0  513.05   22.90
  -4   1   0  488.35   22.90
  -4   1   0  476.35   22.80
  -4   1   0  532.45   23.00
  -4   1   0  493.45   22.40
  -4   1   0  496.85   23.10
  -4   1   0  515.05   22.80
   3  -1   0 3704.43  154.18
   3  -1   0 3652.33  154.18
   3  -1   0 3557.24  154.18
   3  -1   0 3767.42  154.28
   3  -1   0 3632.04  154.18
   3  -1   0 3654.53  154.38
   3  -1   0 3903.91  154.08
  -3   1   0 3750.42  154.28
  -3   1   0 3898.71  154.28
  -3   1   0 3613.94  153.98
  -3   1   0 3557.04  154.18
  -3   1   0 3738.23  154.18
  -3   1   0 3720.43  154.48
  -3   1   0 3684.53  154.18
   2  -1   0 2086.89   84.89
   2  -1   0 1998.80   84.89
   2  -1   0 2003.20   84.89
   2  -1   0 2060.59   84.79
   2  -1   0 2005.80   84.59
   2  -1   0 2084.19   84.89
   2  -1   0 2076.79   84.79
  -2   1   0 2047.50   84.89
  -2   1   0 1928.11   84.79
  -2   1   0 2056.99   84.89
  -2   1   0 1974.10   84.79
  -2   1   0 1949.01   84.89
  -2   1   0 2147.49   84.89
  -2   1   0 2032.20   84.59
   0  -1   0  595.34   25.20
   0  -1   0  652.43   25.10
   0  -1   0  557.64   25.10
  -1  -1   0  256.47   11.10
  -1  -1   0  246.28   11.40
  -1  -1   0  236.28   11.00
  -1  -1   0  249.78   11.00
  -1  -1   0  243.48   11.50
  -1  -1   0  237.78   10.70
  -1  -1   0  235.18   11.10
   1   1   0  233.48   10.70
   1   1   0  242.88   11.00
   1   1   0  229.78   11.00
   1   1   0  238.88   11.70
  -2  -1   0  629.44   27.80
  -2  -1   0  654.83   28.70
  -2  -1   0  638.04   28.30
  -2  -1   0  671.13   28.60
  -2  -1   0  648.94   28.80
  -2  -1   0  665.63   28.30
  -2  -1   0  681.23   28.30
   2   1   0  636.94   28.50
   2   1   0  640.64   27.80
   2   1   0  653.73   28.30
   2   1   0  707.03   28.40
   2   1   0  654.13   28.30
   2   1   0  658.53   28.40
   2   1   0  644.54   28.60
   2   1   0  654.13   28.30
  -3  -1   0   92.09    7.00
  -3  -1   0   80.49    7.60
  -3  -1   0  104.49    7.20
  -3  -1   0   92.49    6.20
  -3  -1   0   81.89    7.90
  -3  -1   0  108.09    7.70
  -3  -1   0   62.19    6.70
  -3  -1   0   93.79    7.50
   3   1   0  102.89    7.90
   3   1   0   87.09    7.50
   3   1   0   85.99    6.80
   3   1   0   97.09    7.30
   3   1   0   93.99    7.10
   3   1   0   84.69    7.10
   3   1   0   89.49    8.40
   3   1   0   91.99    7.70
  -4  -1   0  780.02   33.40
  -4  -1   0  773.32   33.50
  -4  -1   0  741.13   32.70
  -4  -1   0  746.53   33.00
  -4  -1   0  766.42   33.20
  -4  -1   0  717.43   33.80
  -4  -1   0  763.12   33.30
  -4  -1   0  760.92   33.70
   4   1   0  738.23   33.40
   4   1   0  756.52   33.40
   4   1   0  789.52   34.00
   4   1   0  709.73   33.40
   4   1   0  752.02   33.30
   4   1   0  764.32   33.60
   4   1   0  735.93   33.70
   4   1   0  722.93   33.40
  -5  -1   0   45.60    6.00
  -5  -1   0   49.99    5.80
  -5  -1   0   41.60    6.10
  -5  -1   0   39.80    6.00
  -5  -1   0   43.00    5.50
  -5  -1   0   50.49    5.80
  -5  -1   0   37.50    6.00
  -5  -1   0   35.20    4.40
   5   1   0   32.60    5.20
   5   1   0   41.70    5.40
   5   1   0   43.90    5.70
   5   1   0   43.20    6.40
   5   1   0   46.20    6.00
   5   1   0   38.10    6.00
   5   1   0   44.50    5.90
   5   1   0   36.10    5.30
  -6  -1   0  364.46   18.20
  -6  -1   0  346.67   18.20
  -6  -1   0  342.07   17.80
  -6  -1   0  332.27   17.80
  -6  -1   0  355.26   19.00
  -6  -1   0  335.87   17.20
  -6  -1   0  339.27   17.90
  -6  -1   0  311.97   18.30
   6   1   0  368.96   19.20
   6   1   0  364.06   18.80
   6   1   0  335.07   18.30
   6   1   0  368.76   18.00
   6   1   0  338.37   18.60
   6   1   0  362.26   18.70
   6   1   0  350.96   18.10
   6   1   0  357.26   18.70
  -7  -1   0   96.69    9.60
  -7  -1   0   90.49    8.00
  -7  -1   0   89.99    9.10
  -7  -1   0   79.69    7.90
  -7  -1   0   75.19    8.40
  -7  -1   0   88.09    8.30
  -7  -1   0   90.29    8.60
  -7  -1   0   91.89    8.50
   7   1   0   95.19    9.50
   7   1   0   57.69    7.50
   7   1   0   89.49    8.90
   7   1   0   77.29    8.10
   7   1   0  101.29    9.40
   7   1   0   69.79    7.90
   7   1   0   74.69    7.90
   7   1   0   79.99    8.20
  -8  -1   0  116.19   10.90
  -8  -1   0  138.79   11.40
  -8  -1   0  116.29   11.20
  -8  -1   0  113.99    9.50
  -8  -1   0  119.29   10.30
  -8  -1   0  109.99   10.40
  -8  -1   0  105.59   11.20
  -8  -1   0  109.79   10.30
   8   1   0  142.09   12.20
   8   1   0  114.79   11.70
   8   1   0  130.99   11.20
   8   1   0  109.39   10.90
   8   1   0  141.59   12.10
   8   1   0  130.29   11.70
   8   1   0  129.69   11.50
   8   1   0  113.59   10.50
  -9  -1   0    4.40    5.60
  -9  -1   0    0.80    4.20
  -9  -1   0   -2.40    5.70
  -9  -1   0   -5.10    5.00
  -9  -1   0   -2.90    5.00
  -9  -1   0    2.20    5.70
  -9  -1   0    6.60    4.70
   9   1   0    0.10    5.60
   9   1   0    6.30    5.70
   9   1   0   -5.60    5.40
   9   1   0    6.50    6.30
   9   1   0   -0.50    5.10
   9   1   0    3.00    5.80
   9   1   0    2.90    6.60
 -10  -1   0  134.89   11.50
 -10  -1   0  157.88   13.40
 -10  -1   0  116.99   17.30
 -10  -1   0  161.18   12.50
 -10  -1   0  149.29   13.70
  10   1   0  173.38   14.90
  10   1   0  151.28   13.60
  10   1   0  145.89   13.60
  10   1   0  146.59   14.10
  10   1   0  138.79   13.00
  10   1   0  148.49   14.80
 -11  -1   0    3.30    5.50
 -11  -1   0    5.50    6.80
 -11  -1   0   -4.50    6.60
 -11  -1   0   -7.00    4.40
  11   1   0    2.80    6.60
  11   1   0   15.30    7.70
  11   1   0   -3.60    7.00
  11   1   0   -6.90    6.60
  11   1   0    0.70    6.80
 -12  -1   0    0.70    5.20
 -12  -1   0    8.80    5.90
 -12  -1   0    8.40    7.70
  12   1   0    5.30    7.80
  12   1   0    9.00    7.70
  12   1   0   -1.30    7.00
  12   1   0   10.80    8.80
 -13  -1   0   -1.40    5.60
 -13  -1   0   -5.20    7.50
  13   1   0   -0.60    8.30
  13   1   0   -6.60    7.90
  13   1   0   -5.90    8.10
  13   1   0    6.00    8.20
 -14  -1   0   83.59   13.30
  14   1   0   77.99   13.60
  14   1   0   56.09   12.50
  14   1   0   81.89   13.90
  15  -2   0    9.60    9.30
  15  -2   0   -6.10    7.70
  15  -2   0    1.70    9.60
  15  -2   0  -13.50    8.50
 -15   2   0   -6.60    8.90
  14  -2   0   30.30   10.50
  14  -2   0   34.30   10.10
  14  -2   0   26.00   10.70
  14  -2   0   55.79   10.30
 -14   2   0   31.70   13.50
 -14   2   0   21.10    9.70
  13  -2   0   38.40    9.40
  13  -2   0   30.80    8.20
  13  -2   0   26.20    9.20
  13  -2   0   41.20    9.90
 -13   2   0   37.30    8.60
 -13   2   0   27.50    8.30
 -13   2   0   44.40    9.60
 -13   2   0   24.20    9.40
  12  -2   0   24.60    8.70
  12  -2   0   33.80    9.00
  12  -2   0   38.50    8.90
  12  -2   0   55.69    8.90
  12  -2   0   53.39    9.30
 -12   2   0   57.49   10.10
 -12   2   0   52.09    9.50
 -12   2   0   35.40    7.90
 -12   2   0   34.00    8.40
 -12   2   0   43.20    8.40
  11  -2   0  179.58   14.20
  11  -2   0  159.08   14.80
  11  -2   0  136.69   14.10
  11  -2   0  165.48   14.30
  11  -2   0  151.68   15.40
 -11   2   0  168.08   15.10
 -11   2   0  162.68   13.60
 -11   2   0  163.58   14.20
 -11   2   0  135.89   14.00
 -11   2   0  147.99   14.10
  10  -2   0  151.08   13.00
  10  -2   0  142.39   12.50
  10  -2   0  134.59   13.80
  10  -2   0  129.69   12.70
  10  -2   0  137.29   13.30
 -10   2   0  144.39   13.70
 -10   2   0  138.69   12.40
 -10   2   0  154.38   12.90
 -10   2   0  124.49   12.40
 -10   2   0  148.69   14.10
 -10   2   0  134.99   13.30
 -10   2   0  148.19   12.40
 -10   2   0  135.69   12.80
   9  -2   0  100.09   10.60
   9  -2   0  115.39   11.20
   9  -2   0  117.49   11.10
   9  -2   0  105.59   10.70
   9  -2   0  108.39   10.70
   9  -2   0  118.99   11.40
   9  -2   0   99.19   10.20
  -9   2   0  106.49   10.90
  -9   2   0  113.29   10.70
  -9   2   0  109.99   10.70
  -9   2   0  112.59   10.90
  -9   2   0   84.59    9.60
  -9   2   0  117.89   11.20
  -9   2   0   99.69    9.80
  -9   2   0  126.59   11.40
  -9   2   0  120.09   11.70
   8  -2   0    8.80    5.30
   8  -2   0   10.60    5.40
   8  -2   0    4.20    5.70
   8  -2   0    7.60    5.40
   8  -2   0   12.50    5.20
   8  -2   0   13.00    5.00
   8  -2   0    5.90    5.10
  -8   2   0   15.80    6.20
  -8   2   0    5.50    4.50
  -8   2   0   10.50    5.40
  -8   2   0   -0.10    5.00
  -8   2   0   11.80    5.80
  -8   2   0   14.00    5.30
  -8   2   0    3.40    5.00
  -8   2   0    9.30    4.90
  -8   2   0    8.20    5.10
   7  -2   0  290.87   16.60
   7  -2   0  318.37   16.10
   7  -2   0  298.37   16.40
   7  -2   0  258.67   16.00
   7  -2   0  291.27   16.90
   7  -2   0  269.37   16.30
   7  -2   0  269.87   16.00
  -7   2   0  277.77   17.00
  -7   2   0  296.57   16.20
  -7   2   0  304.87   16.60
  -7   2   0  316.07   16.90
  -7   2   0  298.77   16.70
  -7   2   0  302.27   16.40
  -7   2   0  308.67   16.20
  -7   2   0  287.37   15.80
   6  -2   0   55.69    6.60
   6  -2   0   56.99    7.00
   6  -2   0   52.89    6.40
   6  -2   0   58.39    6.10
   6  -2   0   47.10    6.00
   6  -2   0   48.80    6.40
   6  -2   0   51.09    5.80
  -6   2   0   49.99    6.40
  -6   2   0   62.89    7.20
  -6   2   0   55.49    6.80
  -6   2   0   49.40    6.10
  -6   2   0   60.59    6.60
  -6   2   0   66.79    7.60
  -6   2   0   56.39    5.70
  -6   2   0   48.20    6.10
   5  -2   0   87.49    8.10
   5  -2   0  101.79    8.10
   5  -2   0  110.09    8.60
   5  -2   0  107.49    8.50
   5  -2   0   92.29    8.70
   5  -2   0  104.49    8.80
   5  -2   0  123.79    8.40
  -5   2   0  106.39    9.10
  -5   2   0   93.29    8.00
  -5   2   0  105.69    8.00
  -5   2   0  104.09    8.80
  -5   2   0   98.29    8.60
  -5   2   0  103.99    8.40
  -5   2   0   97.09    9.30
   4  -2   0  436.56   20.40
   4  -2   0  419.66   19.30
   4  -2   0  413.96   20.10
   4  -2   0  429.26   20.10
   4  -2   0  451.25   20.40
   4  -2   0  406.66   19.70
   4  -2   0  406.96   19.90
  -4   2   0  438.96   20.30
  -4   2   0  435.96   20.20
  -4   2   0  402.96   20.50
  -4   2   0  426.76   19.90
  -4   2   0  421.06   20.10
  -4   2   0  395.56   19.20
  -4   2   0  438.66   20.30
   3  -2   0   47.20    4.80
   3  -2   0   38.70    3.40
   3  -2   0   49.80    5.00
   3  -2   0   41.90    5.10
   3  -2   0   41.30    4.50
   3  -2   0   39.90    4.60
   3  -2   0   37.90    4.30
  -3   2   0   38.80    4.50
  -3   2   0   39.60    4.80
  -3   2   0   33.70    4.20
  -3   2   0   33.70    4.70
  -3   2   0   36.70    3.40
  -3   2   0   35.40    4.50
  -3   2   0   30.00    4.20
   2  -2   0    0.30    1.00
   2  -2   0    3.10    2.60
   2  -2   0    3.00    2.50
   2  -2   0    5.20    3.00
   2  -2   0    1.90    2.70
  -2   2   0   -2.50    2.70
  -2   2   0   -0.40    2.50
  -2   2   0   -0.10    2.80
  -2   2   0    3.60    2.50
  -2   2   0    5.60    1.30
  -2   2   0    2.70    2.70
  -2   2   0    2.00    2.70
   1  -2   0  637.24   27.00
   1  -2   0  663.23   26.90
   1  -2   0  603.74   26.70
   1  -2   0  651.23   26.80
   1  -2   0  654.73   26.80
  -1   2   0  601.04   26.80
  -1   2   0  635.94   26.90
  -1   2   0  625.04   26.80
  -1   2   0  650.33   26.60
  -1   2   0  619.34   26.90
  -1   2   0  630.44   26.80
   0  -2   0 1787.22   74.09
   0  -2   0 1881.11   74.19
   0  -2   0 1828.32   74.09
   0  -2   0 1714.23   74.59
   0   2   0 1763.22   74.19
   0   2   0 1724.33   74.59
   0   2   0 1787.22   74.89
   0   2   0 1797.82   74.19
   0   2   0 1777.32   74.19
   0   2   0 1812.72   74.19
  -1  -2   0   -2.50    3.00
  -1  -2   0    2.70    2.20
  -1  -2   0    1.90    2.10
  -1  -2   0    2.00    1.90
  -1  -2   0    0.90    2.00
  -1  -2   0    0.90    3.20
   1   2   0   -1.80    2.00
   1   2   0    2.10    2.80
   1   2   0   -0.30    3.20
   1   2   0    0.90    1.40
   1   2   0   -2.90    1.90
   1   2   0    1.30    1.90
   1   2   0   -0.30    1.90
  -2  -2   0 6101.89  261.07
  -2  -2   0 6449.15  261.57
  -2  -2   0 6586.04  261.17
  -2  -2   0 6368.66  261.07
  -2  -2   0 6082.99  261.87
  -2  -2   0 5970.10  260.67
  -2  -2   0 6539.35  261.17
   2   2   0 6540.45  261.27
   2   2   0 6318.87  261.17
   2   2   0 6112.19  261.67
   2   2   0 6458.25  261.77
   2   2   0 6076.29  260.67
   2   2   0 6372.26  261.17
   2   2   0 6368.36  261.97
   2   2   0 6195.08  261.17
  -3  -2   0  878.21   37.80
  -3  -2   0  816.52   37.60
  -3  -2   0  883.61   37.10
  -3  -2   0  929.41   37.80
  -3  -2   0  915.71   38.30
  -3  -2   0  916.51   37.60
  -3  -2   0  879.71   38.70
   3   2   0  885.91   37.80
   3   2   0  835.22   37.80
   3   2   0  869.11   37.90
   3   2   0  841.32   37.80
   3   2   0  845.12   37.00
   3   2   0  840.02   37.80
   3   2   0  874.61   38.30
   3   2   0  870.31   38.60
  -4  -2   0   74.49    7.30
  -4  -2   0   77.69    7.30
  -4  -2   0   84.69    7.40
  -4  -2   0   76.29    5.80
  -4  -2   0   75.19    6.60
  -4  -2   0   79.39    7.90
   4   2   0   60.39    6.90
   4   2   0   65.89    6.30
   4   2   0   56.99    6.60
   4   2   0   71.99    6.70
   4   2   0   78.69    8.40
   4   2   0   74.09    7.60
   4   2   0   75.19    6.70
   4   2   0   69.79    6.50
  -5  -2   0  708.93   33.10
  -5  -2   0  677.33   31.90
  -5  -2   0  753.02   32.10
  -5  -2   0  741.83   32.40
  -5  -2   0  719.03   31.90
  -5  -2   0  714.73   32.70
  -5  -2   0  687.73   31.10
   5   2   0  645.24   31.80
   5   2   0  728.33   32.30
   5   2   0  700.23   32.90
   5   2   0  702.93   32.10
   5   2   0  748.83   33.00
   5   2   0  701.53   32.20
   5   2   0  665.43   32.00
   5   2   0  708.23   32.50
  -6  -2   0  278.87   14.80
  -6  -2   0  276.87   15.00
  -6  -2   0  264.57   13.90
  -6  -2   0  279.17   16.10
  -6  -2   0  266.77   16.10
  -6  -2   0  272.07   14.90
  -6  -2   0  272.97   15.70
  -6  -2   0  241.28   14.80
   6   2   0  264.27   15.60
   6   2   0  243.88   14.90
   6   2   0  280.27   15.60
   6   2   0  284.17   15.30
   6   2   0  268.57   15.90
   6   2   0  296.87   16.50
   6   2   0  278.07   15.60
   6   2   0  273.27   15.10
  -7  -2   0   50.49    6.80
  -7  -2   0   52.69    7.30
  -7  -2   0   61.59    7.20
  -7  -2   0   64.59    7.20
  -7  -2   0   48.80    6.50
  -7  -2   0   65.59    8.70
  -7  -2   0   59.09    6.90
  -7  -2   0   52.59    5.50
   7   2   0   55.59    7.00
   7   2   0   68.39    7.40
   7   2   0   62.69    7.80
   7   2   0   62.79    7.60
   7   2   0   54.69    8.10
   7   2   0   63.09    7.90
   7   2   0   45.00    7.20
   7   2   0   73.49    8.90
  -8  -2   0   23.60    6.10
  -8  -2   0   20.70    6.00
  -8  -2   0   27.60    6.70
  -8  -2   0   34.00    6.60
  -8  -2   0   22.90    5.80
  -8  -2   0   18.60    4.60
  -8  -2   0   17.80    6.00
  -8  -2   0   25.10    6.60
   8   2   0   30.10    6.80
   8   2   0   24.10    6.00
   8   2   0   35.50    7.50
   8   2   0   27.70    6.50
   8   2   0   35.70    7.00
   8   2   0   38.70    6.60
   8   2   0   16.50    6.50
   8   2   0   25.10    6.60
  -9  -2   0   62.19    8.50
  -9  -2   0   30.50    6.50
  -9  -2   0   53.89    7.20
  -9  -2   0   33.80    7.60
  -9  -2   0   41.70    7.20
  -9  -2   0   43.20    5.80
   9   2   0   25.30    7.50
   9   2   0   42.10    8.40
   9   2   0   38.80    7.60
   9   2   0   38.80    8.20
   9   2   0   56.69    8.60
   9   2   0   46.60    8.00
   9   2   0   35.90    7.80
 -10  -2   0   35.10    6.80
 -10  -2   0   44.10    6.20
 -10  -2   0   60.29    9.60
 -10  -2   0   58.69    8.80
  10   2   0   26.80    8.40
  10   2   0   50.39    9.30
  10   2   0   44.90    9.10
  10   2   0   35.40    8.40
  10   2   0   41.60    8.70
  10   2   0   39.70    8.90
  10   2   0   62.49    9.30
 -11  -2   0   -2.40    4.30
 -11  -2   0  -10.70    5.10
 -11  -2   0    1.60    6.50
  11   2   0    2.50    7.50
  11   2   0   -8.20    7.10
  11   2   0   -1.00    6.30
  11   2   0    0.80    7.40
 -12  -2   0   -6.30    6.00
 -12  -2   0    0.50    4.90
  12   2   0   -2.70    7.90
  12   2   0   10.20    8.70
  12   2   0   14.60    8.10
  12   2   0   -4.40    7.60
 -13  -2   0  -13.00    7.00
 -13  -2   0    2.40    5.20
  13   2   0    8.90    9.20
  13   2   0   -3.40    8.80
  13   2   0   -5.00    7.50
  13   2   0   -5.70    6.90
 -14  -2   0   -6.30    8.50
  14   2   0  -11.50    8.90
  14   2   0   12.40    9.90
  14   2   0    2.00    9.20
  15  -3   0    6.90    9.60
  15  -3   0  -19.40    7.00
  15  -3   0    9.50    9.60
 -15   3   0    2.00    8.50
  14  -3   0   17.30    7.60
  14  -3   0   14.50    9.60
  14  -3   0   15.50    9.10
  14  -3   0   32.20    9.80
 -14   3   0   10.80    7.50
 -14   3   0   13.40    7.40
 -14   3   0   18.30    8.30
  13  -3   0   10.20    8.50
  13  -3   0   29.50    8.10
  13  -3   0   20.60    9.40
  13  -3   0   30.40    9.20
 -13   3   0   22.80    8.40
 -13   3   0   17.80    8.50
 -13   3   0   33.60    7.80
  12  -3   0   16.70    7.00
  12  -3   0   16.80    7.80
  12  -3   0   -5.00    7.60
  12  -3   0   17.00    8.40
  12  -3   0    9.40    6.60
 -12   3   0   20.10    7.70
 -12   3   0   11.00    6.70
 -12   3   0   13.00    6.50
 -12   3   0    7.50    7.80
 -12   3   0   10.80    7.80
  11  -3   0  342.07   21.50
  11  -3   0  406.26   23.20
  11  -3   0  337.97   22.60
  11  -3   0  415.56   22.50
  11  -3   0  398.46   21.70
 -11   3   0  345.47   22.20
 -11   3   0  394.16   21.70
 -11   3   0  399.06   22.60
 -11   3   0  393.46   22.60
 -11   3   0  427.06   23.20
 -11   3   0  326.17   23.00
  10  -3   0  114.19   10.60
  10  -3   0   91.19   10.40
  10  -3   0   55.39    8.50
  10  -3   0   68.09    9.40
  10  -3   0   87.89    9.70
 -10   3   0   80.09    9.60
 -10   3   0   89.49   11.20
 -10   3   0   77.89    8.70
 -10   3   0   81.69   10.20
 -10   3   0   68.19    9.30
 -10   3   0   85.19   10.00
 -10   3   0   79.19    9.30
 -10   3   0  110.19   10.60
   9  -3   0  261.37   15.80
   9  -3   0  224.78   15.90
   9  -3   0  261.57   16.10
   9  -3   0  277.67   16.40
   9  -3   0  273.57   16.10
   9  -3   0  250.17   16.40
   9  -3   0  260.67   15.40
  -9   3   0  288.37   17.20
  -9   3   0  255.27   17.60
  -9   3   0  249.58   15.00
  -9   3   0  248.08   16.40
  -9   3   0  240.08   16.00
  -9   3   0  265.57   16.00
  -9   3   0  278.77   16.80
  -9   3   0  262.57   16.40
   8  -3   0  366.86   18.50
   8  -3   0  370.76   19.60
   8  -3   0  338.17   19.80
   8  -3   0  342.07   19.40
   8  -3   0  387.16   19.80
   8  -3   0  357.56   19.50
  -8   3   0  324.27   19.60
  -8   3   0  350.46   19.50
  -8   3   0  355.86   19.30
  -8   3   0  352.86   19.80
  -8   3   0  326.67   19.50
  -8   3   0  338.27   19.20
  -8   3   0  362.86   19.60
  -8   3   0  354.66   18.40
   7  -3   0  235.88   15.00
   7  -3   0  317.87   16.40
   7  -3   0  247.28   15.00
   7  -3   0  298.07   14.60
   7  -3   0  257.97   15.30
   7  -3   0  300.17   16.20
   7  -3   0  240.98   15.20
  -7   3   0  260.17   15.40
  -7   3   0  275.97   16.20
  -7   3   0  268.27   15.80
  -7   3   0  249.58   14.20
  -7   3   0  234.78   15.30
  -7   3   0  264.87   15.20
  -7   3   0  261.37   15.10
   6  -3   0  237.38   14.10
   6  -3   0  217.38   13.10
   6  -3   0  249.58   13.80
   6  -3   0  218.48   13.60
   6  -3   0  247.18   12.40
   6  -3   0  218.58   12.80
   6  -3   0  201.68   13.10
  -6   3   0  241.78   13.40
  -6   3   0  219.78   14.20
  -6   3   0  227.58   13.70
  -6   3   0  230.18   13.70
  -6   3   0  234.88   12.40
  -6   3   0  227.28   13.70
  -6   3   0  235.68   14.00
   5  -3   0  321.07   17.30
   5  -3   0  330.17   17.00
   5  -3   0  363.46   17.70
   5  -3   0  333.97   17.20
   5  -3   0  361.66   17.70
   5  -3   0  369.36   16.30
   5  -3   0  332.27   17.20
  -5   3   0  341.87   17.20
  -5   3   0  320.57   16.00
  -5   3   0  348.17   17.40
  -5   3   0  344.87   17.50
  -5   3   0  325.77   17.50
  -5   3   0  317.27   18.00
  -5   3   0  352.36   17.20
   4  -3   0    3.80    4.00
   4  -3   0   -1.30    4.20
   4  -3   0   -1.20    3.90
   4  -3   0   -2.30    2.40
   4  -3   0   -5.40    3.30
   4  -3   0    2.80    3.60
   4  -3   0   -3.20    3.30
  -4   3   0   -3.20    3.80
  -4   3   0   -0.70    4.00
  -4   3   0   -4.50    3.90
  -4   3   0   -1.10    3.40
  -4   3   0    2.20    2.40
  -4   3   0    0.40    4.00
  -4   3   0    0.50    3.90
   3  -3   0  243.08   11.50
   3  -3   0  211.58   11.20
   3  -3   0  226.08   11.80
   3  -3   0  224.38   11.50
  -3   3   0  222.68   11.70
  -3   3   0  200.58   11.40
  -3   3   0  212.78   11.70
  -3   3   0  217.48   11.50
  -3   3   0  215.38   11.70
  -3   3   0  213.18    9.80
  -3   3   0  208.78   11.30
   2  -3   0   37.50    3.70
   2  -3   0   41.90    4.30
   2  -3   0   33.20    3.60
   2  -3   0   34.70    3.50
   2  -3   0   28.00    3.60
  -2   3   0   32.90    3.70
  -2   3   0   32.20    3.70
  -2   3   0   38.30    3.80
  -2   3   0   29.60    3.60
  -2   3   0   29.40    3.60
   1  -3   0  657.63   27.60
   1  -3   0  645.34   27.30
   1  -3   0  651.93   27.40
   1  -3   0  665.93   27.40
   1  -3   0  660.53   27.40
  -1   3   0  643.84   27.50
  -1   3   0  670.73   27.50
  -1   3   0  642.54   27.40
  -1   3   0  596.84   27.50
  -1   3   0  620.54   27.40
  -1   3   0  618.74   27.40
   0  -3   0 1416.06   61.69
   0  -3   0 1557.04   60.99
   0  -3   0 1522.05   60.89
   0  -3   0 1550.84   61.09
   0   3   0 1447.26   61.09
   0   3   0 1477.95   61.69
   0   3   0 1433.16   61.09
   0   3   0 1395.56   61.09
   0   3   0 1433.96   61.09
   0   3   0 1409.86   62.19
  -1  -3   0    4.20    3.80
  -1  -3   0    0.90    3.60
  -1  -3   0    0.60    2.10
  -1  -3   0    1.20    2.30
  -1  -3   0    0.90    2.20
  -1  -3   0    0.70    2.00
   1   3   0    1.40    2.40
   1   3   0   -0.70    2.30
   1   3   0    0.50    3.70
   1   3   0    5.10    4.00
   1   3   0   -1.50    2.00
   1   3   0   -0.50    2.30
   1   3   0   -0.70    2.30
  -2  -3   0  341.87   15.70
  -2  -3   0  363.36   15.80
  -2  -3   0  348.77   15.70
  -2  -3   0  324.77   17.30
  -2  -3   0  326.97   15.10
  -2  -3   0  338.27   17.00
  -2  -3   0  348.17   15.90
   2   3   0  364.26   17.60
   2   3   0  352.06   16.10
   2   3   0  368.16   17.30
   2   3   0  349.27   15.10
   2   3   0  318.27   15.90
   2   3   0  329.97   15.90
  -3  -3   0    6.50    2.20
  -3  -3   0    1.20    4.30
  -3  -3   0    1.20    3.20
  -3  -3   0    2.30    3.20
  -3  -3   0    4.50    4.40
  -3  -3   0    9.60    3.50
  -3  -3   0    4.60    3.20
   3   3   0    3.20    3.70
   3   3   0    1.10    1.80
   3   3   0   -4.50    3.30
   3   3   0    7.60    3.60
   3   3   0    3.20    4.20
   3   3   0    2.20    4.70
   3   3   0    5.20    3.70
   3   3   0    7.40    3.50
   3   3   0    2.40    4.60
  -4  -3   0 1261.97   53.69
  -4  -3   0 1234.38   54.09
  -4  -3   0 1231.28   53.79
  -4  -3   0 1298.47   54.69
  -4  -3   0 1265.97   55.49
  -4  -3   0 1211.18   52.99
  -4  -3   0 1303.17   53.89
   4   3   0 1207.48   55.09
   4   3   0 1259.77   54.19
   4   3   0 1270.07   54.19
   4   3   0 1233.78   54.89
   4   3   0 1241.98   55.29
   4   3   0 1268.67   54.39
   4   3   0 1315.77   54.39
   4   3   0 1230.78   53.09
   4   3   0 1268.17   54.39
  -5  -3   0  242.18   14.40
  -5  -3   0  249.48   13.80
  -5  -3   0  269.97   13.80
  -5  -3   0  265.97   15.60
  -5  -3   0  254.67   13.70
  -5  -3   0  247.68   12.50
   5   3   0  261.67   14.30
   5   3   0  243.38   13.80
   5   3   0  254.87   14.40
   5   3   0  236.18   14.00
   5   3   0  270.07   15.20
   5   3   0  255.47   15.20
   5   3   0  245.68   14.20
   5   3   0  259.97   15.80
  -6  -3   0   11.70    5.30
  -6  -3   0    0.00    3.80
  -6  -3   0    3.80    3.10
  -6  -3   0   -5.00    3.80
  -6  -3   0    9.80    4.60
  -6  -3   0    3.10    4.40
  -6  -3   0    3.60    2.90
   6   3   0    4.70    4.70
   6   3   0    4.10    4.70
   6   3   0   -4.30    4.80
   6   3   0   -1.40    5.30
   6   3   0    4.00    4.60
   6   3   0    3.30    5.50
   6   3   0    3.60    4.50
   6   3   0    1.90    4.30
  -7  -3   0    1.70    1.40
  -7  -3   0    1.50    5.10
  -7  -3   0    3.40    4.40
  -7  -3   0   -0.20    3.10
  -7  -3   0    2.70    4.20
  -7  -3   0    0.10    4.20
  -7  -3   0   -6.10    4.40
   7   3   0    1.10    5.60
   7   3   0    2.10    4.80
   7   3   0    3.20    5.60
   7   3   0   -1.90    4.40
   7   3   0    3.90    4.90
   7   3   0   -3.80    4.50
   7   3   0    6.10    4.90
   7   3   0   -0.40    5.90
  -8  -3   0   14.30    5.30
  -8  -3   0    1.00    3.30
  -8  -3   0   10.40    6.20
  -8  -3   0   10.20    3.80
  -8  -3   0    7.30    5.10
  -8  -3   0    5.70    5.40
   8   3   0   18.10    7.20
   8   3   0    4.50    6.20
   8   3   0    5.80    5.50
   8   3   0    9.00    5.50
   8   3   0    8.80    6.60
   8   3   0    9.00    6.30
   8   3   0   12.50    6.10
   8   3   0   11.20    5.80
  -9  -3   0   26.20    7.20
  -9  -3   0   41.80    9.50
  -9  -3   0   32.80    7.20
  -9  -3   0   26.80    5.00
  -9  -3   0   29.70    5.90
   9   3   0   23.00    6.70
   9   3   0   25.90    7.60
   9   3   0   31.60    7.50
   9   3   0   33.70    8.00
   9   3   0   42.20    8.00
   9   3   0   40.00    7.60
   9   3   0   32.30    8.40
 -10  -3   0   35.90    6.90
 -10  -3   0   36.80    5.60
 -10  -3   0   49.10    8.20
 -10  -3   0   24.60    7.60
  10   3   0   57.29    9.20
  10   3   0   50.09    8.70
  10   3   0   40.10    9.30
  10   3   0   26.00    8.40
  10   3   0   34.40    8.90
  10   3   0   30.90    8.20
  10   3   0   55.79    9.30
 -11  -3   0   19.00    7.60
 -11  -3   0    6.80    4.60
 -11  -3   0    8.90    6.10
  11   3   0   18.10    8.70
  11   3   0   13.90    8.00
  11   3   0    9.60    7.90
  11   3   0    8.90    8.00
  11   3   0   11.50    7.90
 -12  -3   0   -5.30    6.90
 -12  -3   0   12.30    5.10
  12   3   0   14.50    9.10
  12   3   0   16.50    8.60
  12   3   0    6.80    7.10
  12   3   0    1.60    8.50
 -13  -3   0   -2.60    7.50
  13   3   0   -1.50    8.80
  13   3   0    9.40    9.20
  13   3   0    5.10    9.40
  15  -4   0   21.10    9.70
  15  -4   0    0.60    9.00
  15  -4   0   -2.40    7.40
 -15   4   0  -10.50    9.30
  14  -4   0   21.10    7.90
  14  -4   0   -4.40    8.20
  14  -4   0   -7.40    7.90
  14  -4   0    8.00    8.30
 -14   4   0   16.00    9.90
 -14   4   0   10.60    8.50
 -14   4   0   -6.10    5.10
  13  -4   0    5.80    6.90
  13  -4   0   12.70    7.70
  13  -4   0   15.40    8.30
  13  -4   0    8.30    7.60
 -13   4   0   10.90    8.50
 -13   4   0    1.70    8.20
 -13   4   0   18.20    7.10
  12  -4   0  112.49   14.10
  12  -4   0   99.09   11.70
  12  -4   0  103.99   11.00
  12  -4   0  100.89   12.10
  12  -4   0  101.19   11.40
 -12   4   0  114.09   13.70
 -12   4   0  148.99   14.20
 -12   4   0  101.39   11.90
 -12   4   0  101.49   12.00
 -12   4   0  114.59   13.00
 -12   4   0  125.89   12.20
  11  -4   0   74.99   10.00
  11  -4   0   56.39    9.00
  11  -4   0   80.79   10.30
  11  -4   0   92.59   10.80
  11  -4   0   81.39    8.70
 -11   4   0  101.19   11.30
 -11   4   0  105.19   10.80
 -11   4   0   77.99   10.50
 -11   4   0   71.39    8.90
 -11   4   0   93.09   12.30
 -11   4   0   99.49   11.40
  10  -4   0   71.49    9.20
  10  -4   0   65.49    9.00
  10  -4   0   80.99   10.20
  10  -4   0   75.69    9.50
  10  -4   0   89.59    8.80
 -10   4   0   87.09    9.70
 -10   4   0   73.59    9.10
 -10   4   0   85.69    9.60
 -10   4   0   94.79    9.50
 -10   4   0   82.09   11.20
 -10   4   0   99.59   10.90
 -10   4   0   76.79   11.70
 -10   4   0  114.39   10.90
 -10   4   0   70.39    9.30
   9  -4   0    6.80    5.40
   9  -4   0    6.80    4.80
   9  -4   0   -1.50    5.00
   9  -4   0   13.60    5.40
   9  -4   0    7.10    5.60
   9  -4   0    3.30    4.30
   9  -4   0    0.80    5.60
  -9   4   0    2.00    5.80
  -9   4   0    0.80    4.20
  -9   4   0   16.90    6.60
  -9   4   0    4.00    5.90
  -9   4   0    1.50    5.00
  -9   4   0    2.20    5.10
  -9   4   0    6.20    5.20
  -9   4   0    1.90    4.80
   8  -4   0   32.60    4.90
   8  -4   0   31.90    5.80
   8  -4   0   40.70    6.90
   8  -4   0   31.00    5.70
   8  -4   0   30.40    6.20
   8  -4   0   36.00    6.30
   8  -4   0   40.10    6.60
  -8   4   0   33.90    7.20
  -8   4   0   41.20    5.20
  -8   4   0   42.80    7.10
  -8   4   0   45.60    7.50
  -8   4   0   28.90    6.50
  -8   4   0   31.50    6.00
  -8   4   0   42.40    6.80
   7  -4   0   -0.90    4.20
   7  -4   0    2.50    4.60
   7  -4   0    0.70    4.50
   7  -4   0    0.70    4.60
   7  -4   0    4.40    3.70
   7  -4   0    0.10    4.20
   7  -4   0    0.10    5.00
  -7   4   0    8.30    5.20
  -7   4   0    0.60    4.80
  -7   4   0    3.80    5.00
  -7   4   0    4.20    4.50
  -7   4   0    4.80    4.40
  -7   4   0   -2.70    3.00
  -7   4   0    0.70    4.20
   6  -4   0  212.48   12.70
   6  -4   0  201.38   12.50
   6  -4   0  219.98   11.10
   6  -4   0  209.08   13.20
   6  -4   0  229.98   13.70
   6  -4   0  195.68   12.90
   6  -4   0  223.98   13.20
  -6   4   0  206.58   12.90
  -6   4   0  201.08   13.20
  -6   4   0  223.98   14.00
  -6   4   0  201.88   13.30
  -6   4   0  211.98   13.00
  -6   4   0  194.48   13.10
  -6   4   0  215.18   11.10
   5  -4   0  472.25   21.70
   5  -4   0  478.05   20.20
   5  -4   0  439.76   21.50
   5  -4   0  473.85   21.70
   5  -4   0  407.66   21.50
   5  -4   0  473.15   22.40
  -5   4   0  459.65   22.00
  -5   4   0  465.35   20.30
  -5   4   0  432.06   22.10
  -5   4   0  468.05   22.20
  -5   4   0  431.26   21.70
  -5   4   0  465.85   21.90
  -5   4   0  441.26   21.50
   4  -4   0    1.20    2.50
   4  -4   0    9.10    4.00
   4  -4   0    1.60    3.50
   4  -4   0    4.30    3.50
   4  -4   0    0.00    3.80
  -4   4   0    2.40    3.80
  -4   4   0   -0.50    1.70
  -4   4   0    0.90    3.70
  -4   4   0    2.70    3.90
  -4   4   0   -0.60    3.60
  -4   4   0    0.10    3.70
  -4   4   0    2.10    4.00
   3  -4   0   29.10    4.10
   3  -4   0   30.00    4.00
   3  -4   0   35.60    3.90
   3  -4   0   26.40    4.40
   3  -4   0   27.10    4.00
  -3   4   0   24.20    4.00
  -3   4   0   33.80    2.30
  -3   4   0   23.20    4.00
  -3   4   0   22.90    4.00
  -3   4   0   30.20    4.10
  -3   4   0   26.10    4.30
   2  -4   0  296.07   13.70
   2  -4   0  288.67   13.60
   2  -4   0  289.47   13.70
   2  -4   0  309.67   14.20
   2  -4   0  295.07   13.70
  -2   4   0  285.57   13.90
  -2   4   0  304.37   14.00
  -2   4   0  299.87   13.00
  -2   4   0  283.57   13.90
  -2   4   0  291.37   14.00
  -2   4   0  293.47   13.90
   1  -4   0  198.38   10.30
   1  -4   0  217.28    9.80
   1  -4   0  222.58    9.80
   1  -4   0  213.18    9.90
  -1   4   0  204.88   10.20
  -1   4   0  210.98   10.20
  -1   4   0  193.58   10.20
  -1   4   0  206.28   10.20
  -1   4   0  207.38   10.30
  -1   4   0  204.68   10.20
   0  -4   0  430.96   18.30
   0  -4   0  414.16   19.40
   0  -4   0  433.86   18.10
   0  -4   0  416.86   18.00
   0   4   0  410.46   18.40
   0   4   0  411.06   19.30
   0   4   0  425.66   18.50
   0   4   0  411.56   20.50
   0   4   0  421.16   18.50
   0   4   0  416.96   18.50
  -1  -4   0 1177.18   48.00
  -1  -4   0 1171.98   47.80
  -1  -4   0 1096.29   49.20
  -1  -4   0 1092.29   47.90
  -1  -4   0 1190.78   47.80
  -1  -4   0 1228.58   49.60
   1   4   0 1093.69   48.10
   1   4   0 1113.09   48.10
   1   4   0 1151.78   49.40
   1   4   0 1093.99   49.40
   1   4   0 1101.69   48.10
   1   4   0 1143.89   48.10
  -2  -4   0   67.89    5.30
  -2  -4   0   52.89    4.90
  -2  -4   0   63.59    6.50
  -2  -4   0   59.19    5.30
  -2  -4   0   35.70    5.60
  -2  -4   0   56.99    5.50
   2   4   0   67.09    6.80
   2   4   0   54.69    4.90
   2   4   0   61.69    5.80
   2   4   0   57.89    5.60
   2   4   0   46.90    5.90
   2   4   0   72.49    6.00
   2   4   0   71.09    4.50
  -3  -4   0  609.04   27.30
  -3  -4   0  550.84   27.30
  -3  -4   0  565.34   25.40
  -3  -4   0  562.64   24.70
  -3  -4   0  583.44   25.70
  -3  -4   0  582.94   25.40
  -3  -4   0  606.94   25.60
   3   4   0  534.75   27.10
   3   4   0  574.64   25.80
   3   4   0  588.64   27.20
   3   4   0  589.94   25.90
   3   4   0  559.34   25.80
   3   4   0  559.14   27.60
   3   4   0  566.74   24.70
   3   4   0  568.94   25.90
  -4  -4   0   -0.90    2.90
  -4  -4   0   -6.20    2.90
  -4  -4   0   -0.80    3.20
  -4  -4   0   -2.80    3.30
  -4  -4   0   -1.70    2.10
  -4  -4   0    3.00    4.20
  -4  -4   0    0.10    4.60
   4   4   0    2.60    4.90
   4   4   0   -3.20    3.60
   4   4   0   -2.60    1.80
   4   4   0   -5.90    4.80
   4   4   0   -0.80    3.50
   4   4   0    5.10    5.20
   4   4   0   -2.00    3.70
   4   4   0    3.40    3.50
   4   4   0    1.90    3.90
  -5  -4   0   27.10    4.70
  -5  -4   0   23.20    4.80
  -5  -4   0   37.70    5.00
  -5  -4   0   29.60    3.50
  -5  -4   0   34.50    4.70
  -5  -4   0   16.80    5.40
  -5  -4   0   28.90    5.90
   5   4   0   25.60    5.00
   5   4   0   32.50    5.30
   5   4   0   28.70    5.20
   5   4   0   22.60    5.00
   5   4   0   38.00    6.40
   5   4   0   21.40    5.80
   5   4   0   39.20    7.10
   5   4   0   21.40    5.00
  -6  -4   0   15.80    4.20
  -6  -4   0   16.20    3.10
  -6  -4   0   18.40    5.00
  -6  -4   0    6.60    4.90
  -6  -4   0   16.10    4.70
  -6  -4   0   16.10    4.50
  -6  -4   0   13.20    5.60
   6   4   0   10.10    5.20
   6   4   0   17.10    5.80
   6   4   0   18.10    5.10
   6   4   0   22.20    5.20
   6   4   0   10.40    5.50
   6   4   0   11.20    4.90
   6   4   0   16.30    5.40
   6   4   0   17.80    6.40
  -7  -4   0    0.10    4.40
  -7  -4   0    1.70    5.40
  -7  -4   0    5.50    5.50
  -7  -4   0   -0.90    2.80
  -7  -4   0   -0.90    4.30
  -7  -4   0    4.10    4.40
  -7  -4   0    3.10    4.10
   7   4   0    5.20    5.20
   7   4   0   -2.80    4.90
   7   4   0   -2.20    5.00
   7   4   0    1.10    4.80
   7   4   0   -2.50    4.50
   7   4   0    4.10    6.00
   7   4   0   -4.20    5.80
   7   4   0    2.30    5.80
  -8  -4   0   13.20    6.40
  -8  -4   0    5.20    3.40
  -8  -4   0   11.80    5.40
  -8  -4   0   20.40    6.50
  -8  -4   0   19.00    5.40
   8   4   0   17.40    6.30
   8   4   0   14.60    7.00
   8   4   0    4.30    6.30
   8   4   0   17.80    6.20
   8   4   0   12.70    6.00
   8   4   0   17.50    6.80
   8   4   0   16.00    7.10
   8   4   0   23.90    8.00
  -9  -4   0  122.79   11.80
  -9  -4   0  119.79    9.20
  -9  -4   0  138.69   11.50
  -9  -4   0  143.69   14.50
   9   4   0   98.19   11.90
   9   4   0  123.09   13.60
   9   4   0  128.59   13.00
   9   4   0  134.49   12.60
   9   4   0  119.29   12.30
   9   4   0  134.89   13.90
   9   4   0  165.58   13.40
 -10  -4   0  174.48   12.70
 -10  -4   0  165.38   11.50
 -10  -4   0  183.88   14.70
  10   4   0  179.58   17.00
  10   4   0  197.38   18.20
  10   4   0  186.68   15.40
  10   4   0  194.08   16.70
  10   4   0  173.28   15.30
  10   4   0  169.48   15.50
 -11  -4   0   14.10    7.20
 -11  -4   0    8.00    4.50
  11   4   0   12.80    8.60
  11   4   0   17.70    8.90
  11   4   0    9.60    8.10
  11   4   0   37.70    9.30
  11   4   0   20.60    8.40
 -12  -4   0   27.10    8.80
  12   4   0   31.20    9.70
  12   4   0   26.30    9.10
  12   4   0   29.50   10.60
  12   4   0   28.50   10.00
 -13  -4   0   13.10    7.40
  13   4   0   13.40   10.00
  13   4   0  -13.50    7.30
  13   4   0   15.80    9.80
  15  -5   0   -5.50    9.10
  15  -5   0  -13.60    6.30
  15  -5   0   -6.50    8.70
 -15   5   0  -11.10    8.80
 -15   5   0  -10.90    8.40
  14  -5   0   37.20    9.60
  14  -5   0   41.60    8.20
  14  -5   0   30.90   10.30
 -14   5   0   20.20   10.80
 -14   5   0   29.20   10.40
  13  -5   0   20.00    7.00
  13  -5   0   27.50    8.70
  13  -5   0   20.00    9.70
  13  -5   0   16.50    7.50
 -13   5   0   24.30   10.00
 -13   5   0   32.40    7.20
 -13   5   0   37.60    9.30
 -13   5   0   16.70    8.60
  12  -5   0   13.10    7.90
  12  -5   0    9.90    8.10
  12  -5   0    6.00    5.70
  12  -5   0    3.40    7.10
 -12   5   0   10.90    8.80
 -12   5   0   15.40    6.10
 -12   5   0   21.50    7.40
 -12   5   0    8.20    6.70
 -12   5   0   10.30    7.80
  11  -5   0   95.49   11.30
  11  -5   0  115.79   12.20
  11  -5   0  119.29   12.60
  11  -5   0  108.69   10.90
  11  -5   0   89.49   10.50
 -11   5   0  131.69   12.40
 -11   5   0  107.39   12.80
 -11   5   0  104.89   10.50
 -11   5   0  119.49   12.40
 -11   5   0  116.79   12.70
 -11   5   0  110.09   11.70
  10  -5   0    4.10    5.80
  10  -5   0   -3.40    4.90
  10  -5   0    3.30    6.30
  10  -5   0    2.50    5.90
  10  -5   0   10.00    4.60
 -10   5   0   11.10    5.60
 -10   5   0    5.10    6.40
 -10   5   0   20.80    6.90
 -10   5   0    5.20    6.00
 -10   5   0   12.80    6.60
 -10   5   0    4.40    6.90
 -10   5   0    3.70    4.20
   9  -5   0   95.19    9.80
   9  -5   0  118.99   11.40
   9  -5   0  106.09   10.30
   9  -5   0  132.99   12.00
   9  -5   0  109.89    9.00
   9  -5   0  102.99   10.40
  -9   5   0   96.69   10.60
  -9   5   0  104.09   10.80
  -9   5   0  114.89   11.10
  -9   5   0  101.09    8.80
  -9   5   0  104.29   10.50
  -9   5   0  124.19   10.80
  -9   5   0  101.69   10.70
   8  -5   0    3.60    4.50
   8  -5   0   -7.60    5.10
   8  -5   0    0.30    4.60
   8  -5   0    4.10    3.30
   8  -5   0   -3.90    4.60
   8  -5   0    5.00    5.30
   8  -5   0    7.60    5.50
  -8   5   0   -0.60    5.40
  -8   5   0    2.90    4.80
  -8   5   0   -0.70    3.20
  -8   5   0    7.90    6.10
  -8   5   0    1.50    5.50
  -8   5   0    2.70    5.80
  -8   5   0    1.50    4.80
   7  -5   0   98.09    9.50
   7  -5   0   92.89    9.60
   7  -5   0  110.99    9.60
   7  -5   0   92.49    8.50
   7  -5   0  126.79   10.30
   7  -5   0  120.29    7.50
  -7   5   0   94.69    9.40
  -7   5   0  102.59   10.00
  -7   5   0  112.39    7.40
  -7   5   0  106.29    9.90
  -7   5   0  110.59    9.30
  -7   5   0  106.29   10.80
  -7   5   0  104.39    9.70
   6  -5   0  687.33   32.00
   6  -5   0  750.42   33.10
   6  -5   0  684.53   32.20
   6  -5   0  637.64   32.00
   6  -5   0  758.12   32.40
  -6   5   0  695.43   32.60
  -6   5   0  732.93   30.60
  -6   5   0  720.93   32.60
  -6   5   0  645.34   32.10
  -6   5   0  722.63   33.20
  -6   5   0  736.23   32.70
  -6   5   0  710.03   32.70
   5  -5   0   25.90    4.60
   5  -5   0   15.90    4.60
   5  -5   0   15.90    4.50
   5  -5   0   21.10    4.10
   5  -5   0   12.00    4.50
  -5   5   0   13.30    4.90
  -5   5   0   17.50    2.30
  -5   5   0   10.70    4.60
  -5   5   0   17.90    4.40
  -5   5   0   17.10    4.40
  -5   5   0   14.10    4.60
  -5   5   0   14.30    4.70
   4  -5   0    8.90    4.00
   4  -5   0   11.30    4.00
   4  -5   0    9.80    3.60
   4  -5   0   10.40    3.90
   4  -5   0    8.90    3.20
  -4   5   0    4.60    3.80
  -4   5   0   14.50    4.40
  -4   5   0    6.50    3.90
  -4   5   0    9.10    3.90
  -4   5   0    4.30    4.00
   3  -5   0   13.80    3.50
   3  -5   0   13.60    3.00
   3  -5   0   15.80    3.50
   3  -5   0   10.20    3.90
   3  -5   0   13.20    3.70
  -3   5   0   15.90    3.50
  -3   5   0    5.90    3.80
  -3   5   0   15.30    1.80
  -3   5   0   14.70    3.60
  -3   5   0   15.20    3.60
  -3   5   0   12.50    3.60
   2  -5   0   76.09    5.30
   2  -5   0   78.39    5.50
   2  -5   0   74.19    6.00
   2  -5   0   81.99    5.80
   2  -5   0   82.69    6.30
  -2   5   0   73.49    6.00
  -2   5   0   85.09    6.30
  -2   5   0   67.79    6.30
  -2   5   0   68.99    6.50
  -2   5   0   71.19    5.80
  -2   5   0   80.79    5.30
   1  -5   0    0.30    2.10
   1  -5   0    0.30    1.50
   1  -5   0    2.20    2.30
   1  -5   0    5.80    2.20
   1  -5   0   -0.70    2.80
  -1   5   0   -0.50    2.60
  -1   5   0   -0.40    2.40
  -1   5   0   -3.40    2.50
  -1   5   0    0.00    2.60
  -1   5   0   -0.90    2.50
  -1   5   0    4.60    2.80
   0  -5   0   84.69    7.30
   0  -5   0   88.39    4.90
   0  -5   0   88.69    5.50
   0  -5   0   87.29    4.90
   0   5   0   82.69    6.00
   0   5   0   87.19    7.00
   0   5   0   87.39    6.10
   0   5   0   87.79    6.00
   0   5   0   87.49    5.90
   0   5   0   82.69    8.20
  -1  -5   0    3.10    2.00
  -1  -5   0   14.60    2.30
  -1  -5   0   13.10    2.40
  -1  -5   0   15.60    4.30
  -1  -5   0   13.20    2.70
   1   5   0    9.80    3.00
   1   5   0    9.30    3.00
   1   5   0   14.70    3.10
   1   5   0   13.50    4.20
   1   5   0   10.00    5.10
   1   5   0   12.70    3.20
  -2  -5   0  147.79    7.70
  -2  -5   0  132.89    8.00
  -2  -5   0  140.49   10.50
  -2  -5   0  129.39    7.50
  -2  -5   0  117.99   10.10
  -2  -5   0  143.29    8.10
   2   5   0  136.49    8.10
   2   5   0  133.29    8.30
   2   5   0  140.19    7.40
   2   5   0  131.79   10.60
   2   5   0  134.49   10.30
   2   5   0  139.59    8.70
   2   5   0  132.49    8.40
  -3  -5   0  223.48   11.90
  -3  -5   0  241.48   12.10
  -3  -5   0  234.18   14.30
  -3  -5   0  216.78   14.30
  -3  -5   0  248.48   11.90
  -3  -5   0  236.28   12.20
   3   5   0  240.18   14.80
   3   5   0  249.88   12.50
   3   5   0  245.08   11.10
   3   5   0  237.38   12.90
   3   5   0  228.98   12.40
   3   5   0  252.47   14.50
   3   5   0  225.38   14.90
  -4  -5   0   37.60    6.10
  -4  -5   0   41.00    4.70
  -4  -5   0   35.10    4.60
  -4  -5   0   34.00    4.30
  -4  -5   0   27.70    6.00
  -4  -5   0   31.50    4.20
   4   5   0   35.20    5.00
   4   5   0   32.80    3.00
   4   5   0   30.30    6.30
   4   5   0   33.00    5.20
   4   5   0   37.30    5.10
   4   5   0   43.60    5.30
   4   5   0   25.70    5.00
   4   5   0   36.80    6.20
   4   5   0   39.70    6.80
  -5  -5   0   15.90    2.70
  -5  -5   0   19.60    4.40
  -5  -5   0   10.40    3.80
  -5  -5   0   21.80    6.10
  -5  -5   0   19.40    4.20
  -5  -5   0   14.70    4.10
  -5  -5   0   13.60    5.10
   5   5   0   19.80    4.80
   5   5   0   16.80    5.90
   5   5   0   14.80    6.00
   5   5   0   20.60    4.70
   5   5   0   22.00    6.60
   5   5   0   19.10    5.10
   5   5   0   11.90    4.60
   5   5   0   10.50    4.30
  -6  -5   0    7.20    4.50
  -6  -5   0   -4.40    4.90
  -6  -5   0   -2.20    4.70
  -6  -5   0   -0.50    3.70
  -6  -5   0   -5.70    3.60
  -6  -5   0    5.80    4.20
  -6  -5   0   -0.70    2.30
   6   5   0    2.00    4.70
   6   5   0   -2.40    4.30
   6   5   0    1.10    5.50
   6   5   0    0.60    4.70
   6   5   0   -2.00    4.20
   6   5   0   -1.30    5.80
   6   5   0    5.50    4.80
   6   5   0    2.70    5.20
  -7  -5   0   26.60    6.50
  -7  -5   0   32.20    7.70
  -7  -5   0   28.00    3.90
  -7  -5   0   31.30    5.60
  -7  -5   0   20.70    6.40
  -7  -5   0   29.50    6.00
   7   5   0   29.00    6.30
   7   5   0   31.30    6.40
   7   5   0   29.40    7.00
   7   5   0   30.50    7.70
   7   5   0   25.30    7.10
   7   5   0   24.00    6.00
   7   5   0   43.70    7.10
   7   5   0   25.60    7.50
  -8  -5   0    2.50    3.00
  -8  -5   0    4.20    4.60
  -8  -5   0    3.10    6.30
  -8  -5   0   -1.40    4.80
   8   5   0   -0.30    6.30
   8   5   0   10.60    6.00
   8   5   0    4.20    5.80
   8   5   0   -3.30    6.70
   8   5   0    1.30    5.30
   8   5   0   -0.20    6.30
   8   5   0    2.10    5.20
   8   5   0    2.90    5.80
  -9  -5   0   42.30    5.20
  -9  -5   0   63.09    7.60
  -9  -5   0   54.39    8.10
   9   5   0   54.69    8.60
   9   5   0   45.40    8.30
   9   5   0   52.59    9.60
   9   5   0   59.39   10.30
   9   5   0   45.30    8.70
   9   5   0   62.49    8.70
   9   5   0   46.90    9.70
 -10  -5   0    3.70    3.50
 -10  -5   0   12.10    6.20
 -10  -5   0   19.60    5.90
  10   5   0    6.70    7.80
  10   5   0    6.70    7.70
  10   5   0    8.30    7.70
  10   5   0   12.90    8.50
  10   5   0    7.00    7.00
  10   5   0    7.40    7.30
 -11  -5   0    3.80    6.60
  11   5   0    2.00    8.70
  11   5   0   -7.70    7.10
  11   5   0   10.20    9.10
  11   5   0    3.90    7.10
  11   5   0   13.10    8.90
 -12  -5   0    7.30    6.90
  12   5   0    6.10    8.70
  12   5   0    7.50    8.30
  12   5   0   -3.40    8.00
  12   5   0    6.40    9.40
  15  -6   0   25.30    9.90
  15  -6   0   -0.10    9.20
 -15   6   0   -8.40    8.70
 -15   6   0   18.70   10.20
  14  -6   0    5.30    8.60
  14  -6   0  -10.10    8.40
  14  -6   0    6.60    5.80
 -14   6   0    4.10    9.30
 -14   6   0  -12.70    9.00
 -14   6   0  -17.10    8.10
  13  -6   0   -7.10    8.00
  13  -6   0    9.10    6.00
  13  -6   0    5.40    7.10
  13  -6   0    4.80    7.70
 -13   6   0   -5.10    8.50
 -13   6   0   19.90    8.60
 -13   6   0    3.60    8.70
 -13   6   0    8.90    7.70
  12  -6   0   -0.80    6.30
  12  -6   0   -7.30    4.70
  12  -6   0    4.40    7.40
  12  -6   0    5.60    6.20
 -12   6   0   -2.00    4.80
 -12   6   0    3.20    6.80
 -12   6   0    2.90    8.10
 -12   6   0    4.70    8.20
  11  -6   0   16.10    7.50
  11  -6   0   11.60    7.00
  11  -6   0    1.90    6.30
  11  -6   0   23.50    5.20
 -11   6   0    0.90    4.60
 -11   6   0   16.30    8.10
 -11   6   0   24.00    8.20
 -11   6   0   15.20    8.10
 -11   6   0   13.90    7.30
 -11   6   0   15.10    7.20
  10  -6   0   29.30    6.60
  10  -6   0   21.70    4.80
  10  -6   0   27.20    7.70
  10  -6   0   19.90    7.10
 -10   6   0   27.10    8.30
 -10   6   0   16.90    7.20
 -10   6   0   28.90    5.00
 -10   6   0   13.60    6.20
 -10   6   0   16.80    7.30
 -10   6   0   29.60    7.40
 -10   6   0   22.50    7.30
   9  -6   0   68.39    8.60
   9  -6   0   74.99    8.50
   9  -6   0   65.39   10.00
   9  -6   0   62.59    8.50
  -9   6   0   74.79    9.00
  -9   6   0   56.99    8.50
  -9   6   0   54.79    8.60
  -9   6   0   61.19    8.10
  -9   6   0   66.89    8.90
  -9   6   0   60.99    6.00
  -9   6   0   74.19    9.20
   8  -6   0   17.10    6.10
   8  -6   0   27.90    5.50
   8  -6   0   30.10    5.90
   8  -6   0   21.40    5.80
   8  -6   0   16.90    5.90
  -8   6   0   27.20    6.30
  -8   6   0   20.00    6.40
  -8   6   0   20.30    3.60
  -8   6   0   23.90    6.20
  -8   6   0   16.80    6.30
  -8   6   0   27.00    6.40
  -8   6   0   20.60    6.90
   7  -6   0   24.50    5.10
   7  -6   0   34.30    6.40
   7  -6   0   19.90    5.30
   7  -6   0   29.70    5.70
  -7   6   0   25.20    6.20
  -7   6   0   29.10    6.00
  -7   6   0   26.20    6.00
  -7   6   0   27.50    6.40
  -7   6   0   30.50    3.30
  -7   6   0   36.50    6.10
  -7   6   0   21.60    5.70
   6  -6   0  223.98   13.40
   6  -6   0  218.28   12.50
   6  -6   0  206.28   12.40
   6  -6   0  195.08   12.80
   6  -6   0  229.68   12.60
  -6   6   0  215.88   13.30
  -6   6   0  196.98   13.30
  -6   6   0  219.08    9.90
  -6   6   0  207.48   13.50
  -6   6   0  201.68   13.50
  -6   6   0  221.88   13.40
  -6   6   0  227.78   13.30
   5  -6   0   24.00    4.50
   5  -6   0   32.00    5.10
   5  -6   0   29.70    4.60
   5  -6   0   24.20    4.00
   5  -6   0   26.70    4.90
  -5   6   0   22.90    4.80
  -5   6   0   22.70    4.70
  -5   6   0   26.90    5.10
  -5   6   0   23.10    5.00
  -5   6   0   29.00    5.30
  -5   6   0   25.60    5.10
   4  -6   0   -2.00    3.60
   4  -6   0   -1.10    3.20
   4  -6   0    1.60    3.50
   4  -6   0   -1.00    3.20
   4  -6   0   -0.40    2.70
  -4   6   0   -0.10    3.70
  -4   6   0    6.00    3.70
  -4   6   0    0.00    3.40
  -4   6   0    5.80    3.90
  -4   6   0    5.40    3.80
   3  -6   0  343.97   16.90
   3  -6   0  352.46   16.40
   3  -6   0  382.66   16.80
   3  -6   0  356.76   16.30
   3  -6   0  340.37   16.20
  -3   6   0  321.67   16.80
  -3   6   0  360.86   15.60
  -3   6   0  345.57   16.90
  -3   6   0  333.97   16.80
  -3   6   0  367.66   17.10
  -3   6   0  343.37   16.90
   2  -6   0  556.84   23.80
   2  -6   0  551.14   23.90
   2  -6   0  539.85   24.00
   2  -6   0  560.34   24.60
   2  -6   0  556.74   24.10
  -2   6   0  522.75   24.50
  -2   6   0  552.14   24.20
  -2   6   0  528.25   24.40
  -2   6   0  546.75   24.50
  -2   6   0  557.74   24.40
  -2   6   0  539.05   24.40
   1  -6   0  191.58   11.20
   1  -6   0  216.58    9.70
   1  -6   0  214.88   10.20
   1  -6   0  211.48    9.70
  -1   6   0  204.38   10.80
  -1   6   0  211.28   11.20
  -1   6   0  207.68   10.90
  -1   6   0  212.88   10.80
  -1   6   0  205.68   10.70
  -1   6   0  212.28   10.70
   0  -6   0    0.20    1.70
   0  -6   0   -0.50    1.60
   0  -6   0    2.10    2.20
   0  -6   0    4.50    3.70
   0  -6   0    0.00    0.80
   0   6   0   -1.90    3.10
   0   6   0   -1.20    2.60
   0   6   0    1.80    2.80
   0   6   0    1.90    2.60
   0   6   0    3.60    4.90
   0   6   0    0.00    2.60
  -1  -6   0   37.80    3.70
  -1  -6   0   42.90    3.80
  -1  -6   0   40.70    3.70
  -1  -6   0   53.79    6.10
   1   6   0   44.70    4.30
   1   6   0   41.10    5.40
   1   6   0   39.40    4.30
   1   6   0   40.80    6.90
   1   6   0   41.50    4.20
   1   6   0   37.20    4.20
  -2  -6   0  151.08   11.50
  -2  -6   0  157.98    8.50
  -2  -6   0  152.58    8.70
  -2  -6   0  175.78    8.50
  -2  -6   0  169.18   11.60
  -2  -6   0  169.68    8.80
   2   6   0  166.08   12.00
   2   6   0  146.09    9.20
   2   6   0  160.78    9.50
   2   6   0  158.78    9.50
   2   6   0  154.48    9.50
   2   6   0  169.78    8.70
   2   6   0  154.78   11.50
  -3  -6   0   48.00    6.80
  -3  -6   0   41.50    4.80
  -3  -6   0   58.69    7.40
  -3  -6   0   48.20    4.90
  -3  -6   0   58.89    5.20
  -3  -6   0   47.00    4.90
   3   6   0   43.10    5.20
   3   6   0   44.80    5.30
   3   6   0   51.59    5.40
   3   6   0   44.40    7.10
   3   6   0   46.30    7.10
   3   6   0   63.99    4.40
  -4  -6   0   57.09    5.70
  -4  -6   0   54.99    5.50
  -4  -6   0   50.99    4.80
  -4  -6   0   48.00    7.20
  -4  -6   0   57.59    7.70
  -4  -6   0   51.19    5.20
   4   6   0   41.20    5.70
   4   6   0   45.10    4.00
   4   6   0   53.09    6.10
   4   6   0   52.69    7.40
   4   6   0   57.19    5.80
   4   6   0   43.90    5.80
   4   6   0   52.99    5.80
   4   6   0   28.90    7.10
   4   6   0   47.10    7.40
  -5  -6   0   32.60    5.00
  -5  -6   0   31.10    6.50
  -5  -6   0   48.50    5.10
  -5  -6   0   31.10    4.50
  -5  -6   0   29.90    4.90
  -5  -6   0   45.50    7.30
   5   6   0   22.60    7.30
   5   6   0   29.60    3.10
   5   6   0   22.90    5.30
   5   6   0   33.10    7.60
   5   6   0   52.09    8.20
   5   6   0   43.50    6.10
   5   6   0   29.40    5.50
   5   6   0   42.40    6.00
   5   6   0   40.80    5.70
  -6  -6   0   36.20    6.90
  -6  -6   0   33.00    5.60
  -6  -6   0   32.10    3.40
  -6  -6   0   25.50    6.70
  -6  -6   0   30.60    5.50
  -6  -6   0   33.80    5.20
   6   6   0   30.70    6.20
   6   6   0   34.20    7.80
   6   6   0   32.20    6.00
   6   6   0   35.40    6.10
   6   6   0   29.20    6.00
   6   6   0   19.70    7.50
   6   6   0   26.90    7.10
   6   6   0   40.10    6.60
  -7  -6   0   28.90    5.60
  -7  -6   0   25.50    3.50
  -7  -6   0   33.30    5.60
  -7  -6   0   33.40    8.10
   7   6   0   25.00    6.50
   7   6   0   21.40    7.80
   7   6   0   34.20    6.70
   7   6   0   43.20    9.20
   7   6   0   16.70    6.10
   7   6   0   13.20    6.90
   7   6   0   29.10    6.60
   7   6   0   25.50    6.30
  -8  -6   0   39.40    7.00
  -8  -6   0   54.89    4.80
  -8  -6   0   39.70    8.80
  -8  -6   0   46.10    6.90
   8   6   0   63.89    8.50
   8   6   0   52.69    8.60
   8   6   0   49.40    8.00
   8   6   0   49.80    8.10
   8   6   0   49.00    7.90
   8   6   0   51.49   10.00
   8   6   0   53.19    9.90
   8   6   0   27.00    8.80
  -9  -6   0  172.28   11.80
  -9  -6   0  121.79    8.70
  -9  -6   0  142.59   12.40
   9   6   0  125.19   14.80
   9   6   0  152.78   16.00
   9   6   0  140.69   14.10
   9   6   0  129.19   13.00
   9   6   0  145.79   15.60
   9   6   0  119.99   12.30
 -10  -6   0    8.00    5.90
  10   6   0   11.60    9.40
  10   6   0   11.70    8.90
  10   6   0   20.20    7.80
  10   6   0   11.70    8.40
  10   6   0    2.80    7.00
 -11  -6   0   -0.30    6.10
  11   6   0   18.20    9.90
  11   6   0    7.10    8.40
  11   6   0   13.60    9.20
  11   6   0    8.50    8.20
  12   6   0    0.30    8.40
  12   6   0   15.40   10.20
  12   6   0    4.10    9.80
  12   6   0   -0.80    8.30
 -15   7   0   19.00   10.60
  14  -7   0    0.70    8.40
 -14   7   0  -17.90    8.30
 -14   7   0   16.50   10.40
 -14   7   0   10.50    9.60
  13  -7   0   -2.50    8.10
 -13   7   0   -2.20    8.40
 -13   7   0    0.70    8.00
 -13   7   0    5.30    9.10
  12  -7   0   62.69    9.80
  12  -7   0   57.99   10.50
 -12   7   0   41.00   10.70
 -12   7   0   49.60   10.00
 -12   7   0   76.29    7.50
 -12   7   0   54.99   10.70
  11  -7   0    0.60    5.90
  11  -7   0    6.00    7.00
 -11   7   0    6.80    4.20
 -11   7   0   -5.80    6.40
 -11   7   0   -2.30    7.30
 -11   7   0   17.00    8.50
 -11   7   0   -4.00    7.30
  10  -7   0  418.76   22.60
  10  -7   0  409.16   23.30
 -10   7   0  333.07   23.30
 -10   7   0  458.25   23.70
 -10   7   0  398.26   23.40
 -10   7   0  397.86   23.30
 -10   7   0  394.26   19.30
 -10   7   0  413.96   23.60
   9  -7   0   68.39    8.30
   9  -7   0   74.39    8.70
  -9   7   0   76.59    9.60
  -9   7   0   78.19    9.60
  -9   7   0   88.39   10.10
  -9   7   0   86.89   10.20
  -9   7   0   71.39    9.50
  -9   7   0  112.59   10.80
  -9   7   0   88.79    6.70
   8  -7   0  129.19   11.10
   8  -7   0  128.69   10.50
   8  -7   0  156.98   12.00
   8  -7   0  148.79   11.90
  -8   7   0  111.09   10.90
  -8   7   0  119.19   12.20
  -8   7   0  137.69   11.50
  -8   7   0  124.49   11.50
  -8   7   0  142.89   12.50
  -8   7   0  131.19   11.70
  -8   7   0  115.89    7.20
   7  -7   0   16.50    5.10
   7  -7   0    7.30    4.50
   7  -7   0   20.40    5.00
   7  -7   0   11.60    4.60
   7  -7   0   12.20    5.20
  -7   7   0    1.60    5.00
  -7   7   0   18.00    5.40
  -7   7   0   10.40    5.70
  -7   7   0   26.90    5.80
  -7   7   0   16.50    5.70
  -7   7   0    3.60    5.40
   6  -7   0  161.88   11.30
   6  -7   0  166.48   11.10
   6  -7   0  177.08   11.40
   6  -7   0  185.68   11.30
   6  -7   0  182.38   12.10
  -6   7   0  194.78   13.10
  -6   7   0  183.88   12.30
  -6   7   0  204.88   12.50
  -6   7   0  181.68   12.20
  -6   7   0  178.78   12.60
  -6   7   0  180.98   12.40
   5  -7   0    3.00    3.40
   5  -7   0   -5.60    3.90
   5  -7   0   -1.50    3.40
   5  -7   0    5.00    3.80
   5  -7   0   -2.70    3.50
  -5   7   0   -3.30    4.00
  -5   7   0    0.90    4.00
  -5   7   0    0.40    3.80
  -5   7   0    6.10    4.30
  -5   7   0    5.30    4.10
   4  -7   0  863.51   38.30
   4  -7   0  917.61   39.10
   4  -7   0  857.51   38.40
   4  -7   0  878.41   38.40
   4  -7   0  899.71   38.60
  -4   7   0  887.21   39.20
  -4   7   0  839.12   38.80
  -4   7   0  901.91   39.00
  -4   7   0  907.41   39.00
  -4   7   0  843.12   38.90
   3  -7   0   40.90    4.50
   3  -7   0   36.50    3.80
   3  -7   0   41.60    4.10
   3  -7   0   49.80    5.00
   3  -7   0   39.40    4.20
  -3   7   0   43.90    4.90
  -3   7   0   41.90    4.80
  -3   7   0   34.40    4.70
  -3   7   0   42.70    4.80
  -3   7   0   32.20    4.60
  -3   7   0   48.60    4.40
   2  -7   0  732.23   31.40
   2  -7   0  724.83   31.10
   2  -7   0  737.13   31.40
   2  -7   0  745.93   31.00
  -2   7   0  706.33   31.90
  -2   7   0  730.83   31.80
  -2   7   0  688.83   31.80
  -2   7   0  751.22   31.90
  -2   7   0  714.83   31.90
  -2   7   0  712.03   31.90
   1  -7   0  604.04   27.60
   1  -7   0  613.34   25.80
   1  -7   0  611.54   25.80
   1  -7   0  628.24   26.30
  -1   7   0  560.44   26.80
  -1   7   0  618.94   27.10
  -1   7   0  610.24   27.00
  -1   7   0  587.54   26.80
  -1   7   0  600.54   29.60
  -1   7   0  613.44   26.90
  -1   7   0  611.04   27.50
   0  -7   0   44.80    3.60
   0  -7   0   39.80    3.20
   0  -7   0   47.70    5.80
   0  -7   0   47.60    3.20
   0  -7   0   45.10    4.40
   0   7   0   40.00    5.20
   0   7   0   40.60    4.40
   0   7   0   42.60    7.40
   0   7   0   39.30    4.10
   0   7   0   47.40    4.40
   0   7   0   41.80    4.40
   0   7   0   37.80    4.20
  -1  -7   0   38.20    5.60
  -1  -7   0   47.50    4.80
  -1  -7   0   47.10    3.50
  -1  -7   0   49.00    3.60
   1   7   0   49.60    4.70
   1   7   0   45.20    4.50
   1   7   0   41.00    4.50
   1   7   0   44.10    7.50
   1   7   0   44.00    4.60
   1   7   0   43.60    5.80
  -2  -7   0   31.50    3.00
  -2  -7   0   26.30    5.60
  -2  -7   0   23.70    3.30
  -2  -7   0   33.40    3.10
  -2  -7   0   32.60    3.70
   2   7   0   24.80    4.10
   2   7   0   22.30    5.70
   2   7   0   31.50    4.40
   2   7   0   34.60    4.50
   2   7   0   28.30    4.20
   2   7   0   21.80    6.20
   2   7   0   36.70    3.80
  -3  -7   0   14.50    2.90
  -3  -7   0   12.10    5.30
  -3  -7   0   22.00    3.50
  -3  -7   0   25.80    3.70
  -3  -7   0   17.00    5.70
  -3  -7   0   20.30    3.10
   3   7   0   11.00    4.00
   3   7   0   12.40    4.00
   3   7   0   15.10    5.90
   3   7   0   10.80    5.80
   3   7   0   23.80    2.90
   3   7   0   14.00    4.10
  -4  -7   0   43.90    5.00
  -4  -7   0   47.70    7.90
  -4  -7   0   37.80    6.70
  -4  -7   0   60.99    5.50
  -4  -7   0   49.70    4.70
  -4  -7   0   40.70    5.10
   4   7   0   44.90    4.00
   4   7   0   41.20    5.60
   4   7   0   58.39    6.00
   4   7   0   42.80    6.00
   4   7   0   39.10    5.80
   4   7   0   43.70    8.40
   4   7   0   39.20    7.70
   4   7   0   37.60    7.00
   4   7   0   46.50    5.90
  -5  -7   0   24.40    4.40
  -5  -7   0   25.80    4.60
  -5  -7   0   31.40    4.90
  -5  -7   0   52.79    8.00
  -5  -7   0   24.90    7.20
   5   7   0   35.30    7.40
   5   7   0   19.80    5.50
   5   7   0   35.30    5.90
   5   7   0   33.80    6.10
   5   7   0   29.10    5.60
   5   7   0   29.00    2.90
   5   7   0   26.20    5.60
   5   7   0   25.80    7.20
   5   7   0   30.70    7.90
  -6  -7   0  138.49   14.30
  -6  -7   0  152.78   11.10
  -6  -7   0  163.28   11.90
  -6  -7   0  152.78   10.60
   6   7   0  152.88   14.80
   6   7   0  155.98   12.60
   6   7   0  162.78   12.00
   6   7   0  137.19   14.10
   6   7   0  161.98   12.00
   6   7   0  192.68   15.60
   6   7   0  178.48   12.40
   6   7   0  158.08   11.90
  -7  -7   0   67.69    7.50
  -7  -7   0   89.49    8.70
  -7  -7   0   82.09   11.20
   7   7   0   96.89   11.70
   7   7   0  102.39    9.60
   7   7   0   75.29    9.20
   7   7   0   73.79    9.30
   7   7   0   80.99    9.20
   7   7   0   85.49   12.00
   7   7   0   52.19   10.20
   7   7   0  103.89    9.80
  -8  -7   0   22.00    5.80
  -8  -7   0   34.10    5.70
   8   7   0   35.30    7.00
   8   7   0   33.70    9.50
   8   7   0   21.40    7.10
   8   7   0   29.90    7.70
   8   7   0   27.80    7.20
   8   7   0   40.30    9.60
   8   7   0   20.20    8.80
  -9  -7   0    1.80    5.20
   9   7   0   -4.30    6.90
   9   7   0   -6.40    5.90
   9   7   0    5.60    8.20
   9   7   0    3.10    8.60
   9   7   0    6.60    7.30
 -10  -7   0   19.20    6.60
  10   7   0   27.10    9.00
  10   7   0   16.30    9.70
  10   7   0    1.00    9.00
  10   7   0   18.10    7.60
  11   7   0   -5.30    9.30
  11   7   0   24.60    9.00
  11   7   0   30.60    9.40
  11   7   0   26.20   11.30
  14  -8   0   -0.70    8.90
 -14   8   0    8.70    9.10
 -14   8   0   12.60    9.70
 -14   8   0    3.30    9.50
  13  -8   0   77.59   12.00
 -13   8   0   84.09   13.40
 -13   8   0   67.59   12.40
 -13   8   0   67.39   12.00
  12  -8   0   75.89   11.20
  12  -8   0   69.79   11.10
 -12   8   0   73.29   12.00
 -12   8   0   73.89   11.30
 -12   8   0   85.09   12.20
  11  -8   0   -4.90    5.80
  11  -8   0  -12.20    5.70
 -11   8   0    8.50    7.70
 -11   8   0   -1.90    7.40
 -11   8   0    2.80    3.40
 -11   8   0    5.50    7.90
  10  -8   0    3.80    4.10
  10  -8   0   -3.70    6.00
 -10   8   0   12.00    6.40
 -10   8   0   15.90    7.70
 -10   8   0   10.60    6.90
 -10   8   0   10.80    7.10
 -10   8   0   10.70    7.90
   9  -8   0   19.80    6.60
   9  -8   0   10.00    4.90
  -9   8   0   10.80    6.60
  -9   8   0    9.20    6.20
  -9   8   0    4.70    6.30
  -9   8   0   12.00    6.50
  -9   8   0   19.60    7.30
  -9   8   0   11.60    6.90
   8  -8   0  208.48   14.00
   8  -8   0  228.88   14.70
   8  -8   0  255.87   15.60
  -8   8   0  248.08   16.10
  -8   8   0  228.18   15.40
  -8   8   0  228.68   15.60
  -8   8   0  238.78   16.30
  -8   8   0  237.58   15.70
  -8   8   0  207.48   15.20
   7  -8   0    1.10    4.20
   7  -8   0    1.80    4.20
   7  -8   0   -0.60    4.70
   7  -8   0   -0.90    3.80
   7  -8   0   -0.40    4.30
  -7   8   0    3.90    4.80
  -7   8   0    3.60    5.30
  -7   8   0   10.40    5.60
  -7   8   0  -11.20    4.80
  -7   8   0    4.20    5.00
  -7   8   0    4.80    5.30
   6  -8   0   66.49    7.50
   6  -8   0   68.39    6.30
   6  -8   0   79.59    7.30
   6  -8   0   58.69    6.40
   6  -8   0   55.59    6.10
  -6   8   0   62.29    7.00
  -6   8   0   69.69    7.30
  -6   8   0   68.99    8.70
  -6   8   0   49.30    6.80
  -6   8   0   57.49    6.90
  -6   8   0   63.59    7.20
   5  -8   0    3.50    3.90
   5  -8   0    1.20    4.20
   5  -8   0    5.00    3.50
   5  -8   0    1.40    2.90
   5  -8   0    7.90    3.60
  -5   8   0    1.60    4.10
  -5   8   0   10.80    4.50
  -5   8   0    0.60    4.00
  -5   8   0    7.40    4.20
  -5   8   0    8.20    4.50
   4  -8   0   87.49    7.30
   4  -8   0   88.09    7.90
   4  -8   0  100.39    7.40
   4  -8   0   79.59    6.50
   4  -8   0   93.49    6.80
  -4   8   0   89.99    8.30
  -4   8   0  101.79    8.30
  -4   8   0   94.79    8.20
  -4   8   0   94.19    8.00
  -4   8   0   96.89    5.30
  -4   8   0   98.79    8.20
   3  -8   0   86.79    6.50
   3  -8   0   91.49    6.90
   3  -8   0   96.49    6.20
   3  -8   0   82.29    6.10
  -3   8   0   98.19    6.40
  -3   8   0   91.99    7.30
  -3   8   0   96.59    8.10
  -3   8   0   94.39    7.90
  -3   8   0   87.49    7.50
  -3   8   0   82.79    7.40
   2  -8   0  291.97   13.20
   2  -8   0  280.07   12.50
   2  -8   0  275.67   12.50
  -2   8   0  286.97   14.10
  -2   8   0  262.27   13.90
  -2   8   0  256.87   14.10
  -2   8   0  281.97   13.90
  -2   8   0  266.87   14.00
  -2   8   0  273.97   13.90
   1  -8   0    0.70    2.20
   1  -8   0    3.10    1.40
   1  -8   0   -1.60    1.90
   1  -8   0    1.90    1.40
  -1   8   0   -4.60    3.00
  -1   8   0    1.80    5.80
  -1   8   0    3.40    3.00
  -1   8   0    2.10    2.90
  -1   8   0    1.80    3.20
  -1   8   0    1.80    3.10
  -1   8   0    3.30    3.20
   0  -8   0  123.09    6.80
   0  -8   0  109.79    9.50
   0  -8   0  121.99    6.60
   0   8   0  124.39    8.10
   0   8   0  127.09    8.30
   0   8   0  115.99    7.70
   0   8   0  112.49    7.90
   0   8   0  125.99   11.60
   0   8   0  116.29    9.40
   0   8   0  110.09    8.00
  -1  -8   0   68.99    7.40
  -1  -8   0   88.79    5.50
  -1  -8   0   83.79    5.70
   1   8   0   68.49    7.60
   1   8   0   82.99    9.50
   1   8   0  101.09    7.50
   1   8   0   91.39    7.10
   1   8   0   76.29    6.70
   1   8   0   82.99    7.10
   1   8   0   78.69    6.70
  -2  -8   0  291.77   14.00
  -2  -8   0  285.67   13.00
  -2  -8   0  302.77   13.20
  -2  -8   0  291.37   17.30
   2   8   0  286.67   14.30
   2   8   0  289.87   15.10
   2   8   0  298.47   17.70
   2   8   0  288.47   18.40
   2   8   0  298.97   15.00
   2   8   0  276.77   14.90
   2   8   0  288.77   14.90
  -3  -8   0   14.30    3.40
  -3  -8   0    9.80    5.30
  -3  -8   0   18.90    3.50
  -3  -8   0   18.10    2.80
  -3  -8   0   17.80    2.90
   3   8   0   12.40    4.20
   3   8   0   12.60    4.30
   3   8   0   20.20    4.60
   3   8   0   15.10    2.80
   3   8   0   28.50    7.20
   3   8   0   17.20    5.80
  -4  -8   0    1.00    3.50
  -4  -8   0    5.90    3.40
  -4  -8   0   15.80    6.10
  -4  -8   0   -2.10    5.30
  -4  -8   0    8.10    3.10
   4   8   0    3.20    2.00
   4   8   0   -1.60    4.10
   4   8   0   12.40    4.70
   4   8   0    3.40    4.50
   4   8   0    9.20    6.30
   4   8   0   10.30    6.30
   4   8   0    7.70    6.40
   4   8   0    7.20    3.90
   4   8   0    8.90    4.60
  -5  -8   0  267.77   13.90
  -5  -8   0  239.68   17.40
  -5  -8   0  253.27   13.20
  -5  -8   0  263.57   14.30
   5   8   0  226.38   15.20
   5   8   0  276.47   15.60
   5   8   0  239.28   14.90
   5   8   0  254.07   11.60
   5   8   0  282.47   18.50
   5   8   0  250.17   18.60
   5   8   0  242.88   14.80
   5   8   0  242.08   18.60
   5   8   0  239.38   15.10
  -6  -8   0   -0.70    6.20
  -6  -8   0    1.40    3.60
  -6  -8   0    5.10    4.20
   6   8   0   -2.70    4.70
   6   8   0    4.40    6.80
   6   8   0   12.00    7.90
   6   8   0  -14.60    5.40
   6   8   0    1.80    5.30
   6   8   0   -0.20    5.00
   6   8   0    6.30    5.30
   6   8   0    3.10    5.10
  -7  -8   0   -2.60    4.20
  -7  -8   0   14.00    4.50
   7   8   0    5.90    6.10
   7   8   0    9.50    5.80
   7   8   0   -7.90    7.60
   7   8   0   14.20    8.40
   7   8   0    6.60    6.10
   7   8   0   16.50    8.30
   7   8   0    4.40    5.50
   7   8   0    3.80    6.60
  -8  -8   0   24.40    6.20
  -8  -8   0   12.70    5.20
   8   8   0   16.80    8.70
   8   8   0   24.90    9.10
   8   8   0   11.90    9.70
   8   8   0   20.70    6.80
   8   8   0   11.50    7.10
  -9  -8   0   11.70    7.20
   9   8   0    6.90    7.50
   9   8   0   -0.40    8.90
   9   8   0   11.60    9.70
   9   8   0    7.10    9.50
   9   8   0   -0.80    7.00
  10   8   0   16.50   10.90
  10   8   0   -0.70    7.20
  10   8   0   12.70    8.00
  10   8   0    9.30    9.70
  14  -9   0   -4.60    8.30
 -14   9   0   -4.30    9.80
 -14   9   0   14.80   10.50
 -14   9   0   -5.50    9.10
  13  -9   0   -7.50    7.30
 -13   9   0    9.50    9.70
 -13   9   0   -7.20    8.00
 -13   9   0    8.00    8.90
  12  -9   0   23.10    8.70
 -12   9   0   45.90   10.30
 -12   9   0   31.00    9.40
 -12   9   0   29.10    9.50
  11  -9   0  134.59   13.00
 -11   9   0  153.58   15.40
 -11   9   0  135.89   14.20
 -11   9   0  137.59   14.10
  10  -9   0    1.80    5.10
  10  -9   0    8.20    6.60
 -10   9   0    0.60    6.80
 -10   9   0   13.90    7.50
 -10   9   0    9.60    7.20
 -10   9   0   10.10    6.80
 -10   9   0   -0.30    6.00
   9  -9   0  301.47   17.50
   9  -9   0  285.97   17.90
  -9   9   0  298.87   18.60
  -9   9   0  310.37   19.10
  -9   9   0  305.27   19.30
  -9   9   0  295.27   18.70
  -9   9   0  311.37   20.10
   8  -9   0    8.70    5.10
   8  -9   0    7.60    5.10
   8  -9   0   10.00    6.10
  -8   9   0   21.60    6.80
  -8   9   0   16.60    6.30
  -8   9   0   10.30    6.20
  -8   9   0   19.40    6.30
  -8   9   0   17.00    6.90
  -8   9   0   14.40    6.60
   7  -9   0  187.98   12.80
   7  -9   0  198.18   13.70
   7  -9   0  197.38   12.40
   7  -9   0  201.48   14.00
  -7   9   0  179.08   13.60
  -7   9   0  200.08   14.10
  -7   9   0  188.98   14.30
  -7   9   0  208.98   13.40
  -7   9   0  198.48   14.00
  -7   9   0  198.68   14.10
   6  -9   0  106.79    8.80
   6  -9   0  112.39    8.60
   6  -9   0  106.69   10.30
   6  -9   0  110.99    9.30
  -6   9   0  114.69   10.60
  -6   9   0  110.69   10.10
  -6   9   0  115.19   10.20
  -6   9   0  128.49   10.50
  -6   9   0  112.49   10.00
   5  -9   0    4.20    3.20
   5  -9   0   -1.90    4.00
   5  -9   0    0.60    3.70
   5  -9   0    6.00    3.10
   5  -9   0    0.80    3.50
  -5   9   0    6.20    4.10
  -5   9   0    6.10    4.50
  -5   9   0   -1.50    4.10
  -5   9   0    9.40    4.70
  -5   9   0    1.60    4.30
   4  -9   0   67.09    6.20
   4  -9   0   67.89    6.40
   4  -9   0   72.09    5.90
   4  -9   0   66.29    5.80
   4  -9   0   75.39    7.40
  -4   9   0   59.09    6.40
  -4   9   0   62.69    6.40
  -4   9   0   84.89    5.20
  -4   9   0   56.19    6.30
  -4   9   0   62.79    6.60
  -4   9   0   58.99    6.50
   3  -9   0    3.70    2.30
   3  -9   0    5.30    2.40
   3  -9   0    6.40    2.80
   3  -9   0    9.50    3.00
  -3   9   0    4.30    3.50
  -3   9   0    2.00    3.60
  -3   9   0    7.50    4.20
  -3   9   0    7.50    2.90
  -3   9   0   -2.90    3.50
  -3   9   0    7.20    3.40
   2  -9   0    7.30    1.90
   2  -9   0    3.70    2.60
   2  -9   0    5.70    2.10
   2  -9   0    8.60    1.80
  -2   9   0    5.90    3.40
  -2   9   0   13.00    3.70
  -2   9   0   11.80    3.40
  -2   9   0    9.80    3.80
  -2   9   0    6.40    3.50
  -2   9   0    3.80    3.30
   1  -9   0  220.98   10.60
   1  -9   0  219.58   10.60
  -1   9   0  215.88   11.50
  -1   9   0  209.98   11.70
  -1   9   0  224.38   12.00
  -1   9   0  212.98   13.10
  -1   9   0  224.38   11.90
  -1   9   0  210.78   15.40
  -1   9   0  227.98   12.10
   0  -9   0   15.00    4.70
   0  -9   0   19.80    2.80
   0  -9   0   21.80    2.90
   0   9   0   19.20    4.00
   0   9   0   25.30    4.20
   0   9   0   20.90    4.80
   0   9   0   18.70    4.10
   0   9   0   17.90    7.00
   0   9   0   21.50    4.00
   0   9   0   25.70    4.20
  -1  -9   0    8.60    4.60
  -1  -9   0    5.00    2.40
  -1  -9   0    5.20    2.40
   1   9   0    5.80    4.50
   1   9   0   11.00    4.00
   1   9   0   11.20    3.60
   1   9   0    5.50    3.70
   1   9   0    5.00    3.50
   1   9   0   11.00    3.80
   1   9   0    7.40    6.60
  -2  -9   0   16.50    5.50
  -2  -9   0   13.80    2.80
  -2  -9   0   20.40    3.20
   2   9   0   20.10    4.20
   2   9   0   13.80    4.30
   2   9   0   19.60    4.40
   2   9   0   23.50    7.90
   2   9   0   14.00    4.20
   2   9   0   18.70    6.40
   2   9   0   14.10    3.60
  -3  -9   0   12.30    5.80
  -3  -9   0   30.50    4.00
  -3  -9   0   24.00    2.70
   3   9   0   26.80    7.40
   3   9   0   21.40    6.50
   3   9   0   16.90    4.80
   3   9   0   26.30    3.40
   3   9   0   19.10    4.80
   3   9   0   26.10    5.00
  -4  -9   0  389.66   17.20
  -4  -9   0  369.86   18.10
  -4  -9   0  336.67   21.80
  -4  -9   0  392.06   18.30
   4   9   0  352.96   23.30
   4   9   0  386.26   19.50
   4   9   0  377.76   19.30
   4   9   0  352.86   19.50
   4   9   0  377.16   16.80
   4   9   0  386.46   23.30
   4   9   0  367.96   19.80
   4   9   0  374.86   23.10
   4   9   0  357.86   19.60
  -5  -9   0  191.88   11.40
  -5  -9   0  170.48   10.50
  -5  -9   0  177.68    9.70
  -5  -9   0  167.38   15.20
   5   9   0  145.59   11.60
   5   9   0  142.29   15.50
   5   9   0  173.58   12.70
   5   9   0  135.49   14.70
   5   9   0  156.78   12.30
   5   9   0  164.38   12.10
   5   9   0  137.79   11.80
   5   9   0  150.48   16.00
  -6  -9   0  387.96   18.60
  -6  -9   0  373.96   19.50
   6   9   0  387.16   21.00
   6   9   0  358.46   24.80
   6   9   0  356.66   25.00
   6   9   0  386.56   21.30
   6   9   0  375.76   24.40
   6   9   0  394.36   21.10
   6   9   0  364.66   21.40
  -7  -9   0    0.40    3.70
  -7  -9   0    2.60    4.40
   7   9   0    1.70    5.50
   7   9   0   -4.70    7.50
   7   9   0    7.40    8.70
   7   9   0    1.60    5.90
   7   9   0    5.20    6.30
   7   9   0    7.20    8.50
   8   9   0   61.59   12.80
   8   9   0   55.29    9.80
   8   9   0   72.79   12.80
   8   9   0   69.19    9.70
   8   9   0   53.39   11.20
   9   9   0    7.10    7.10
   9   9   0    6.20   10.10
   9   9   0   -3.90    9.60
   9   9   0    8.00    7.30
  10   9   0   -0.10   10.70
  10   9   0    5.80    8.30
  10   9   0   -7.30    9.90
  10   9   0   -9.40    6.70
  13 -10   0   -7.20    7.20
 -13  10   0   -7.10    7.90
 -13  10   0  -13.10    8.90
 -13  10   0   -7.80    8.00
  12 -10   0   -1.30    7.00
 -12  10   0   -7.30    7.30
 -12  10   0  -12.60    7.20
 -12  10   0    4.40    8.50
  11 -10   0  119.99   12.60
 -11  10   0  124.89   14.10
 -11  10   0  161.38   15.30
 -11  10   0  129.09   13.60
  10 -10   0  159.98   12.40
  10 -10   0  138.29   13.00
 -10  10   0   97.69   11.80
 -10  10   0  148.09   13.20
 -10  10   0  121.09   13.30
 -10  10   0  140.89   13.40
   9 -10   0    5.30    5.50
   9 -10   0   16.20    5.40
  -9  10   0    9.60    7.00
  -9  10   0   -1.90    6.70
  -9  10   0   23.40    7.20
  -9  10   0   16.20    6.80
  -9  10   0   20.60    7.10
   8 -10   0   74.99    9.60
   8 -10   0   70.19    8.00
   8 -10   0   83.49    8.10
  -8  10   0   70.69    9.20
  -8  10   0   86.89    9.60
  -8  10   0   68.19    9.30
  -8  10   0   90.19   10.20
  -8  10   0   86.29    9.40
   7 -10   0   14.30    4.90
   7 -10   0   11.50    5.50
   7 -10   0   -2.30    4.10
  -7  10   0   11.00    5.60
  -7  10   0    9.90    6.00
  -7  10   0    8.90    5.40
  -7  10   0   18.60    6.40
  -7  10   0    9.30    5.50
   6 -10   0   -1.80    4.50
   6 -10   0    2.10    4.00
   6 -10   0    2.90    3.60
   6 -10   0    3.00    4.00
  -6  10   0   10.20    5.20
  -6  10   0   -2.70    5.00
  -6  10   0    7.80    4.90
  -6  10   0    5.40    4.80
  -6  10   0    0.20    5.00
   5 -10   0  117.79    8.30
   5 -10   0  123.59   10.20
   5 -10   0  131.09    8.90
   5 -10   0  130.39    9.20
  -5  10   0  135.79   10.50
  -5  10   0  139.69   10.40
  -5  10   0  125.09   10.40
  -5  10   0  133.59   10.70
  -5  10   0  133.39   10.50
   4 -10   0   23.70    3.50
   4 -10   0   24.30    4.10
   4 -10   0   30.70    4.30
  -4  10   0   30.40    5.40
  -4  10   0   29.30    5.30
  -4  10   0   32.50    5.20
  -4  10   0   27.80    5.50
  -4  10   0   25.10    3.30
  -4  10   0   24.60    5.00
   3 -10   0  254.07   11.00
   3 -10   0  232.38   10.90
   3 -10   0  235.38   12.00
  -3  10   0  224.98   12.50
  -3  10   0  237.58   13.40
  -3  10   0  221.68   13.30
  -3  10   0  243.58   13.10
  -3  10   0  234.38   13.10
  -3  10   0  214.88   13.20
   2 -10   0   41.10    3.80
   2 -10   0   31.20    3.50
  -2  10   0   32.90    4.90
  -2  10   0   35.00    5.00
  -2  10   0   42.50    5.40
  -2  10   0   32.00    4.80
  -2  10   0   38.50    5.30
  -2  10   0   43.80    8.90
  -2  10   0   44.30    5.30
   1 -10   0    6.90    2.30
   1 -10   0    8.30    2.40
  -1  10   0   12.40    4.30
  -1  10   0    7.30    3.80
  -1  10   0    5.90    3.80
  -1  10   0   10.90    3.80
  -1  10   0   11.80    3.70
  -1  10   0   26.50    8.10
  -1  10   0    8.80    4.00
   0 -10   0  149.69    7.90
   0 -10   0  156.58    8.10
   0  10   0  161.68   10.00
   0  10   0  144.39   11.70
   0  10   0  153.08   10.40
   0  10   0  135.29   14.70
   0  10   0  157.08   10.00
   0  10   0  167.58   10.20
   0  10   0  153.88   10.00
  -1 -10   0  159.18    8.50
  -1 -10   0  143.89   12.50
  -1 -10   0  165.38    8.50
   1  10   0  160.68   10.60
   1  10   0  193.68   11.20
   1  10   0  160.98   10.60
   1  10   0  153.18   12.70
   1  10   0  166.48   10.50
   1  10   0  176.18   15.60
   1  10   0  169.18   10.60
   1  10   0  179.88   10.90
  -2 -10   0   51.99    7.80
  -2 -10   0   56.89    5.20
  -2 -10   0   64.19    5.30
   2  10   0   55.39    6.30
   2  10   0   52.09    6.20
   2  10   0   61.09    5.80
   2  10   0   62.19   10.30
   2  10   0   67.39    6.50
   2  10   0   60.19    6.50
   2  10   0   46.40    8.00
  -3 -10   0  566.34   31.00
  -3 -10   0  647.44   26.80
  -3 -10   0  603.44   26.70
   3  10   0  584.84   31.30
   3  10   0  595.44   28.10
   3  10   0  581.04   28.40
   3  10   0  541.05   32.00
   3  10   0  619.64   26.70
  -4 -10   0    5.40    6.20
  -4 -10   0   -1.70    1.00
  -4 -10   0    6.40    3.30
   4  10   0   -6.00    4.30
   4  10   0    9.70    4.90
   4  10   0   -5.40    6.20
   4  10   0   -3.10    7.50
   4  10   0   -4.60    4.50
   4  10   0    1.00    2.00
   4  10   0   -2.30    7.50
   4  10   0   -4.50    3.70
   4  10   0    4.30    5.00
  -5 -10   0   18.30    4.40
  -5 -10   0   20.30    5.20
   5  10   0   18.70    6.20
   5  10   0   22.90    5.70
   5  10   0   17.50    6.10
   5  10   0   28.90    9.40
   5  10   0   13.30    5.60
   5  10   0   21.60    8.80
   5  10   0    7.80    8.30
   6  10   0   32.80    7.50
   6  10   0   35.80   10.40
   6  10   0   25.00    7.10
   6  10   0   36.10   10.70
   6  10   0   53.99   10.30
   7  10   0    6.70    6.20
   7  10   0    9.30    9.30
   7  10   0    8.20    8.80
   7  10   0    7.20    6.30
   7  10   0   -1.60    9.10
   8  10   0    8.50    7.60
   8  10   0   10.60   10.20
   8  10   0   17.20   10.80
   8  10   0    9.30    7.10
   9  10   0   -0.70    9.90
   9  10   0   -3.70    7.10
   9  10   0   -4.30    7.20
   9  10   0    8.20   10.60
  13 -11   0    2.50    7.20
 -13  11   0    4.70    8.90
 -13  11   0   -5.60    9.30
 -13  11   0    6.10    9.30
  12 -11   0   -0.30    6.30
 -12  11   0   22.50    9.70
 -12  11   0   13.40    9.00
 -12  11   0   17.40    9.70
  11 -11   0   26.40    7.50
 -11  11   0   23.20    9.00
 -11  11   0   27.20    9.10
 -11  11   0   30.00    9.00
  10 -11   0    8.40    6.20
 -10  11   0    8.20    7.70
 -10  11   0    3.30    7.40
 -10  11   0    5.70    7.40
   9 -11   0   10.00    5.00
   9 -11   0   15.10    5.70
  -9  11   0    8.50    7.10
  -9  11   0   10.40    7.40
  -9  11   0   13.60    7.20
   8 -11   0   -2.30    4.10
   8 -11   0   -1.90    4.50
  -8  11   0    9.00    6.20
  -8  11   0   -2.20    6.30
  -8  11   0    1.50    6.00
  -8  11   0    9.30    6.30
  -8  11   0    6.20    6.30
   7 -11   0  213.68   12.90
   7 -11   0  247.68   15.10
   7 -11   0  205.28   13.40
  -7  11   0  216.28   15.30
  -7  11   0  224.28   15.80
  -7  11   0  211.18   15.50
  -7  11   0  243.28   15.30
  -7  11   0  212.78   15.20
   6 -11   0   -6.20    3.30
   6 -11   0    4.70    4.10
   6 -11   0    0.10    4.80
  -6  11   0   -6.90    4.60
  -6  11   0   -0.50    5.00
  -6  11   0    1.40    5.00
  -6  11   0   -3.20    5.10
  -6  11   0    9.50    4.80
   5 -11   0    9.10    3.10
   5 -11   0    9.00    3.70
   5 -11   0    7.60    3.60
  -5  11   0   11.10    5.10
  -5  11   0   10.80    4.60
  -5  11   0   21.80    5.20
  -5  11   0   -1.50    4.90
  -5  11   0    0.10    4.60
   4 -11   0  111.49    6.50
   4 -11   0  116.59    8.00
  -4  11   0   98.89    9.10
  -4  11   0  103.89    9.30
  -4  11   0  113.99    7.40
  -4  11   0   92.89    8.70
  -4  11   0  113.29    9.70
  -4  11   0  105.79    9.30
   3 -11   0   13.90    3.20
   3 -11   0   11.70    2.90
  -3  11   0   16.90    4.70
  -3  11   0   10.50    3.60
  -3  11   0    8.30    3.80
  -3  11   0   13.50    4.80
  -3  11   0   14.20    4.40
  -3  11   0    5.10    8.60
  -3  11   0   10.80    4.80
   2 -11   0   36.20    3.40
   2 -11   0   33.10    3.60
  -2  11   0   33.60    5.50
  -2  11   0   33.20    5.30
  -2  11   0   32.80    5.10
  -2  11   0   43.80   10.10
  -2  11   0   38.20    5.70
  -2  11   0   27.00    5.00
  -2  11   0   35.60    5.10
   1 -11   0  336.07   14.50
   1 -11   0  334.17   14.50
  -1  11   0  306.87   16.40
  -1  11   0  328.67   18.20
  -1  11   0  324.77   21.90
  -1  11   0  307.27   16.80
  -1  11   0  310.97   16.80
  -1  11   0  304.77   16.70
  -1  11   0  337.77   16.70
   0 -11   0    0.20    1.80
   0 -11   0    0.60    1.80
   0  11   0    0.10    3.80
   0  11   0    0.00    4.40
   0  11   0    3.40    3.90
   0  11   0   -1.10    3.90
   0  11   0    0.10    3.90
   0  11   0   -1.60    7.70
   0  11   0   -4.90    3.60
  -1 -11   0  143.39   13.10
  -1 -11   0  163.18    7.70
  -1 -11   0  154.98    7.70
   1  11   0  165.78   16.20
   1  11   0  151.08   10.50
   1  11   0  153.18   10.90
   1  11   0  139.49   10.50
   1  11   0  161.98   10.90
   1  11   0  155.68   10.60
   1  11   0  153.58   10.20
   1  11   0  139.39   13.10
  -2 -11   0    5.00    2.40
  -2 -11   0    5.90    2.50
  -2 -11   0    2.80    5.80
   2  11   0    2.30    3.70
   2  11   0    8.70    4.30
   2  11   0    2.20    4.30
   2  11   0   -0.70    5.70
   2  11   0   10.80    8.20
   2  11   0    2.00    4.30
   2  11   0    2.80    4.60
  -3 -11   0   30.30    7.40
  -3 -11   0   25.30    3.50
  -3 -11   0   19.40    3.20
   3  11   0   28.30    7.90
   3  11   0   33.00    6.20
   3  11   0   35.60    9.50
   3  11   0   32.00    4.10
  -4 -11   0   30.20    4.10
  -4 -11   0   22.60    3.70
  -4 -11   0   23.20    7.80
   4  11   0   14.40    8.20
   4  11   0   30.70    9.90
   4  11   0   23.30    6.30
   4  11   0   19.60    6.00
   4  11   0   28.00    6.20
   4  11   0   23.90    9.50
   5  11   0    3.30    7.70
   5  11   0    4.60    8.40
   5  11   0   15.50    9.70
   5  11   0    0.10    5.40
   5  11   0    2.50    5.90
   6  11   0   10.60    9.20
   6  11   0   10.60    9.50
   6  11   0    6.60    6.30
   6  11   0    9.00    5.90
   6  11   0    2.70    8.80
   7  11   0   18.10    7.70
   7  11   0    5.40    7.00
   7  11   0   33.00   11.60
   7  11   0   18.50   10.50
   8  11   0   13.20    7.50
   8  11   0  -11.30    9.20
   8  11   0   -7.00    6.90
   8  11   0   -7.10    9.90
 -12  12   0    8.20    8.80
 -12  12   0   19.70    9.70
 -12  12   0   21.70   10.30
  11 -12   0   46.50    9.60
 -11  12   0   81.59   11.70
 -11  12   0   57.09   11.10
 -11  12   0   62.49   11.00
  10 -12   0    5.50    5.60
 -10  12   0    7.90    7.40
 -10  12   0   -3.10    7.50
 -10  12   0    8.30    7.80
   9 -12   0   -5.80    4.70
  -9  12   0  -14.30    6.10
  -9  12   0   12.10    7.30
  -9  12   0   -5.90    6.80
   8 -12   0   -3.50    4.20
   8 -12   0   -4.90    3.60
  -8  12   0   -1.80    5.80
  -8  12   0    5.70    6.20
  -8  12   0   -1.50    6.00
   7 -12   0  301.47   17.80
   7 -12   0  291.57   15.30
   7 -12   0  279.97   16.10
  -7  12   0  272.97   17.90
  -7  12   0  325.37   18.30
  -7  12   0  268.07   18.00
  -7  12   0  273.17   18.00
   6 -12   0   21.80    4.70
   6 -12   0   21.20    4.30
  -6  12   0   31.10    6.90
  -6  12   0   25.50    6.30
  -6  12   0   20.30    9.30
  -6  12   0   11.40    5.80
  -6  12   0   21.80    5.90
   5 -12   0    0.00    3.00
   5 -12   0   -5.30    3.20
   5 -12   0    1.00    2.40
  -5  12   0   -0.40    5.20
  -5  12   0   -9.00    4.70
  -5  12   0   -4.40    4.40
  -5  12   0  -13.40    4.00
  -5  12   0   -1.60    3.90
   4 -12   0   27.10    3.90
   4 -12   0   20.90    3.60
  -4  12   0   15.10    5.10
  -4  12   0   18.30    4.60
  -4  12   0   16.80    5.20
  -4  12   0   26.10    5.20
  -4  12   0   18.90    5.50
  -4  12   0   23.00    3.80
   3 -12   0   82.69    5.80
   3 -12   0   88.99    6.10
  -3  12   0   77.99    7.40
  -3  12   0   82.29    7.90
  -3  12   0   71.09   11.70
  -3  12   0   82.69    7.90
  -3  12   0   92.89    8.70
  -3  12   0   76.89    7.80
  -3  12   0   79.29    7.80
   2 -12   0   24.40    2.70
   2 -12   0   25.00    2.60
  -2  12   0   21.50    5.10
  -2  12   0   26.00    9.70
  -2  12   0   19.30    4.90
  -2  12   0   16.20    4.80
  -2  12   0   21.70    5.00
  -2  12   0   24.10    5.30
  -2  12   0   23.20    4.50
  -1  12   0  616.04   28.20
  -1  12   0  608.34   28.30
  -1  12   0  587.54   28.50
  -1  12   0  600.14   33.80
  -1  12   0  600.64   28.20
  -1  12   0  600.64   30.00
  -1  12   0  644.44   29.10
   0  12   0   -2.80    7.80
   0  12   0    8.30    4.30
   0  12   0    4.60    4.00
   0  12   0    2.10    4.00
   0  12   0    5.90    4.50
   0  12   0    3.00    4.20
   0  12   0    3.50    5.00
   1  12   0    1.80    5.50
   1  12   0    9.50    4.60
   1  12   0    6.00    4.40
   1  12   0    7.00    4.70
   1  12   0   12.60    8.70
   1  12   0    9.60    4.80
   1  12   0    0.00    4.10
  -2 -12   0   30.00    7.60
   2  12   0   18.70    5.00
   2  12   0   12.00    5.40
   2  12   0   12.80    5.40
   2  12   0   21.90    5.30
   2  12   0    7.20    9.10
   2  12   0    4.60    6.60
   2  12   0   15.90    4.50
  -3 -12   0    2.00    6.20
  -3 -12   0   17.50    2.70
   3  12   0    4.90    5.30
   3  12   0    5.50    5.10
   3  12   0    5.40    7.10
   3  12   0   26.30    9.90
   3  12   0   17.90    5.60
   4  12   0   10.20    5.50
   4  12   0    6.50    9.50
   4  12   0   -1.30    7.70
   4  12   0    4.40    5.40
   4  12   0    4.00    8.60
   5  12   0    7.30    6.10
   5  12   0   14.00   10.10
   5  12   0   13.10    6.40
   5  12   0   30.60   10.30
   5  12   0   20.40    8.80
   6  12   0   49.00   12.30
   6  12   0   58.89   13.10
   6  12   0   50.29    9.00
   6  12   0   63.99    9.30
 -11  13   0    9.30    8.10
 -11  13   0  -13.40    7.80
 -11  13   0    3.70    8.40
 -10  13   0   29.60    8.80
 -10  13   0   15.60    8.60
 -10  13   0   24.90    9.00
  -9  13   0   27.50    8.60
  -9  13   0   37.50    8.80
  -9  13   0   38.70    8.70
  -8  13   0  157.38   14.70
  -8  13   0  158.28   14.80
  -8  13   0  146.99   14.50
   7 -13   0  169.68   10.70
  -7  13   0  196.28   15.00
  -7  13   0  182.18   14.60
  -7  13   0  188.88   14.30
   6 -13   0   -8.10    3.20
  -6  13   0   13.80    5.40
  -6  13   0   -3.80    5.70
  -6  13   0   -0.30    5.50
  -6  13   0   11.70    6.70
   5 -13   0   30.70    7.10
   5 -13   0   43.80    4.80
  -5  13   0   26.60    6.40
  -5  13   0   36.80    6.20
  -5  13   0   22.30    6.50
  -5  13   0   28.30    6.60
   4 -13   0   22.00    3.50
   4 -13   0   22.80    3.30
  -4  13   0   21.80    5.80
  -4  13   0   17.00    5.80
  -4  13   0   15.00    5.50
  -4  13   0   47.10   11.00
  -4  13   0   23.30    4.00
  -4  13   0   33.50    5.70
   3 -13   0    1.70    2.00
   3 -13   0    0.40    2.00
  -3  13   0   -6.40    3.30
  -3  13   0    3.50    9.00
  -3  13   0   -1.10    3.70
  -3  13   0    2.90    5.00
  -3  13   0   -3.70    4.50
  -3  13   0   -0.30    4.70
  -2  13   0   85.69    9.30
  -2  13   0   77.79    7.30
  -2  13   0   67.29   12.70
  -2  13   0   85.59    8.30
  -2  13   0   82.19    7.60
  -2  13   0   75.09    7.90
  -1  13   0    4.20    4.40
  -1  13   0    8.20    5.00
  -1  13   0   -2.30    4.40
  -1  13   0    6.40    4.10
  -1  13   0    0.20    8.90
  -1  13   0   -1.30    4.30
   0  13   0   31.40    5.80
   0  13   0   33.00    5.90
   0  13   0   41.80   11.50
   0  13   0   36.60    7.50
   0  13   0   30.40    5.40
   0  13   0   30.20    5.70
   0  13   0   39.60    6.50
   1  13   0   -1.40    5.60
   1  13   0    2.60    8.90
   1  13   0   -4.50    4.80
   1  13   0    1.30    4.60
   1  13   0   14.10    5.00
   2  13   0   -4.30    6.50
   2  13   0  -11.70    9.20
   2  13   0    2.70    4.60
   2  13   0    6.50    5.30
   2  13   0   -5.40    4.70
   3  13   0  124.79   13.90
   3  13   0  108.89   10.90
   3  13   0  110.19   11.10
   3  13   0  115.29   15.20
   4  13   0  -15.10    8.90
   4  13   0  -13.20   10.00
   4  13   0    1.50    8.10
   4  13   0    1.40    5.80
   4  13   0    0.70    5.60
   5  13   0   97.19   15.00
   5  13   0   82.49   10.00
   5  13   0   85.89    9.80
   5  13   0   84.29   14.20
 -10  14   0   13.60    8.20
 -10  14   0    9.20    7.90
 -10  14   0   12.60    8.20
  -9  14   0   65.99   10.30
  -9  14   0   46.00    9.50
  -9  14   0   54.39    9.70
  -8  14   0   96.29   11.20
  -8  14   0   99.89   11.10
  -8  14   0   98.19   11.10
  -7  14   0   23.40    6.90
  -7  14   0   12.60    6.70
  -7  14   0   27.30    7.30
  -6  14   0   -2.80    5.60
  -6  14   0    8.20    5.30
  -6  14   0    1.10    5.30
  -5  14   0   -4.10    4.90
  -5  14   0    5.70    4.50
  -5  14   0    7.90   11.00
  -5  14   0   -3.00    5.20
  -4  14   0   30.90    6.20
  -4  14   0   18.00    5.50
  -4  14   0   29.70    6.40
  -4  14   0   29.40   10.80
  -4  14   0   25.70    7.20
  -3  14   0   -8.10    9.10
  -3  14   0   -1.80    4.60
  -3  14   0    4.00    5.10
  -3  14   0    7.40    5.30
  -2  14   0   53.49    6.90
  -2  14   0   57.89    7.50
  -2  14   0   47.10   12.20
  -2  14   0   49.99   10.70
  -2  14   0   46.00    7.00
  -1  14   0    3.70    4.90
  -1  14   0   12.40    9.90
  -1  14   0    5.40    5.00
  -1  14   0    3.10    4.80
  -1  14   0    5.60    4.50
   0  14   0    3.40    4.70
   0  14   0  -14.20    4.50
   0  14   0   -2.70    4.90
   0  14   0    8.40    5.00
   0  14   0   -3.30    9.70
   1  14   0   -5.80    4.50
   1  14   0   -6.70    4.70
   1  14   0  -14.20    5.50
   1  14   0   -8.30    9.50
   2  14   0   17.10   10.60
   2  14   0    1.60    6.90
   3  14   0   18.70    6.10
   3  14   0   22.00   11.20
   3  14   0   14.70    6.40
   3  14   0   15.80    8.50
   3  14   0   15.10   11.20
  -8  15   0    4.20    7.40
  -8  15   0   -4.70    7.20
  -7  15   0   -1.00    5.80
  -7  15   0    1.60    6.30
  -6  15   0   -2.40    5.40
  -6  15   0   -1.90   11.50
  -6  15   0   -1.50    5.80
  -5  15   0   17.50   11.40
  -5  15   0   -1.40    5.60
  -5  15   0    4.90    5.70
  -4  15   0   -2.80    4.90
  -4  15   0    0.00    5.40
  -4  15   0    0.30    9.90
  -3  15   0   81.09    8.20
  -3  15   0   67.19    8.20
  -3  15   0   67.79   14.40
  -2  15   0   19.90    5.40
  -2  15   0   24.60   10.80
  -2  15   0   12.90    5.60
  -1  15   0   11.70   11.60
  -1  15   0    3.10    4.90
  -1  15   0    5.30    5.30
   0  15   0    3.10    5.10
   0  15   0    7.30   11.60
   0  15   0    0.50    4.80
   1  15   0    5.80   10.70
   1  15   0    0.10    4.80
   1  15   0   -2.60    5.30
  -4  16   0    6.90    5.90
  -4  16   0    8.80   11.20
  -4  16   0    2.80    5.40
  -3  16   0   11.80    5.30
  -3  16   0    3.80    5.60
  -3  16   0   26.00   12.60
  -2  16  -1    2.90    4.50
  -2  16  -1    7.70    5.10
  -2  16  -1    6.50   10.80
  -3  16  -1   -0.20    4.60
  -3  16  -1   21.60   12.50
  -3  16  -1    0.10    5.00
  -4  16  -1   -3.40    5.00
  -4  16  -1   14.30   11.00
  -4  16  -1   -0.80    4.80
  -5  16  -1  -11.60    9.90
  -5  16  -1   11.50    5.60
  -5  16  -1   -4.10    4.90
  -6  16  -1    9.70    5.90
  -6  16  -1    6.10    5.80
  -6  16  -1   -0.40   10.80
   2  15  -1    1.50   10.20
   2  15  -1   -7.40    6.10
   2  15  -1    5.30    5.30
   2  15  -1    6.50    4.60
   1  15  -1   20.60   10.90
   1  15  -1   10.00    5.10
   1  15  -1   -0.40    6.60
   0  15  -1   -1.30    4.50
   0  15  -1    8.80   10.20
   0  15  -1    1.40    4.30
  -1  15  -1   24.20   11.40
  -1  15  -1   23.30    5.50
  -1  15  -1   22.20    6.30
  -1  15  -1   24.00    5.00
  -2  15  -1   71.89    7.50
  -2  15  -1   82.89   15.10
  -2  15  -1   62.09    6.90
  -2  15  -1   74.29    8.70
  -3  15  -1   78.19   13.90
  -3  15  -1   61.79    7.30
  -3  15  -1   48.20    6.50
  -4  15  -1   23.00    5.90
  -4  15  -1    7.80    5.00
  -4  15  -1   17.90   10.30
  -5  15  -1   -0.30   10.30
  -5  15  -1    2.10    5.60
  -5  15  -1    8.80    5.40
  -6  15  -1    0.40    5.50
  -6  15  -1   -0.50    5.60
  -7  15  -1   31.80    8.00
  -7  15  -1   26.70    7.50
  -7  15  -1   27.20    7.40
  -8  15  -1  160.48   14.70
  -8  15  -1  143.99   14.70
  -8  15  -1  168.98   16.10
  -9  15  -1    5.00    7.10
  -9  15  -1    5.80    8.30
  -9  15  -1   14.50    7.80
   4  14  -1   71.49    8.60
   4  14  -1   65.69   12.30
   4  14  -1   76.29    8.50
   4  14  -1   72.99   13.60
   4  14  -1   56.29   13.90
   3  14  -1   90.29   14.60
   3  14  -1   75.69    8.10
   3  14  -1   79.29    8.70
   3  14  -1   61.39   11.10
   3  14  -1   72.39   13.60
   2  14  -1   23.00    5.40
   2  14  -1    7.80   10.10
   2  14  -1   -3.50    6.70
   2  14  -1   19.10    5.30
   1  14  -1    4.10    4.50
   1  14  -1  -12.30    5.50
   1  14  -1    8.60    4.40
   1  14  -1    6.20    4.50
   1  14  -1   22.50   10.70
   0  14  -1   -0.40    4.10
   0  14  -1   17.20   10.30
   0  14  -1    2.80    4.20
   0  14  -1   16.80    4.80
   0  14  -1    2.20    5.50
  -1  14  -1   25.80    5.30
  -1  14  -1   27.90    5.00
  -1  14  -1   20.70    6.30
  -1  14  -1   41.50   11.70
  -1  14  -1   26.60    6.60
  -1  14  -1   19.80    5.30
  -2  14  -1  196.98   13.30
  -2  14  -1  149.99   11.00
  -2  14  -1  159.78   12.00
  -2  14  -1  162.78   11.50
  -2  14  -1  183.58   19.60
  -2  14  -1  162.38   12.40
  -3  14  -1   93.69    9.00
  -3  14  -1   81.79    8.20
  -3  14  -1   96.49    8.60
  -3  14  -1   89.39    8.60
  -3  14  -1   69.29   12.90
  -4  14  -1   14.80    5.40
  -4  14  -1   12.70    5.00
  -4  14  -1   11.90    5.30
  -4  14  -1   19.40    5.50
  -4  14  -1   24.50   10.20
  -5  14  -1    2.90    5.30
  -5  14  -1    0.10    4.70
  -5  14  -1    4.40    5.00
  -5  14  -1    8.50    5.60
  -6  14  -1   15.40    5.70
  -6  14  -1    9.30    6.00
  -6  14  -1    1.20    5.90
  -7  14  -1  129.79   12.70
  -7  14  -1   95.89   10.40
  -7  14  -1   92.39   10.40
  -8  14  -1   83.09   10.50
  -8  14  -1   77.09   10.10
  -8  14  -1   74.39   10.00
  -9  14  -1    9.10    7.70
  -9  14  -1    4.00    7.40
  -9  14  -1    4.60    7.00
 -10  14  -1    6.30    7.60
 -10  14  -1   -1.50    7.70
 -10  14  -1    8.20    7.90
   5  13  -1   50.29    8.30
   5  13  -1   43.20   13.00
   5  13  -1   51.29   12.50
   5  13  -1   60.89    7.90
   5  13  -1   34.30   11.60
   4  13  -1   40.60    7.40
   4  13  -1   33.60   10.90
   4  13  -1   42.60    7.00
   4  13  -1   56.89   11.20
   4  13  -1   48.60   12.30
   3  13  -1   13.80    5.40
   3  13  -1    1.60    9.60
   3  13  -1   18.20    5.20
   3  13  -1    7.60    5.20
   3  13  -1   14.00   10.20
   3  13  -1    0.50    7.20
   2  13  -1   31.00    5.70
   2  13  -1   12.30    7.20
   2  13  -1   23.10    5.20
   2  13  -1   28.20   10.60
   2  13  -1   25.70    6.10
   1  13  -1   65.09    7.10
   1  13  -1   88.39    8.60
   1  13  -1   84.69    8.50
   1  13  -1   60.29    9.70
   1  13  -1   78.89    7.60
   1  13  -1   78.09    7.20
   1  13  -1   64.09   12.90
   0  13  -1    6.60    4.90
   0  13  -1    2.00    4.20
   0  13  -1   -2.50    4.00
   0  13  -1   10.60    5.30
   0  13  -1    3.60    4.10
   0  13  -1   -1.30    8.70
   0  13  -1  -10.00    4.30
  -1  13  -1   69.39    6.80
  -1  13  -1   61.69    8.10
  -1  13  -1   64.99    6.90
  -1  13  -1   40.90   10.70
  -1  13  -1   68.29    6.50
  -1  13  -1   73.19    7.70
  -2  13  -1   34.30    5.10
  -2  13  -1   21.00    9.60
  -2  13  -1   36.50    5.40
  -2  13  -1   34.30    6.10
  -2  13  -1   40.80    5.70
  -2  13  -1   23.10    5.70
  -3  13  -1   78.89    7.70
  -3  13  -1   66.59    7.30
  -3  13  -1   80.99    8.60
  -3  13  -1   77.59    8.10
  -3  13  -1   75.59    7.30
  -3  13  -1   87.39   13.20
  -4  13  -1  104.89    9.20
  -4  13  -1   99.89    8.40
  -4  13  -1   95.29    8.60
  -4  13  -1   97.19    9.00
  -4  13  -1  105.49   10.10
  -5  13  -1   14.90    3.60
  -5  13  -1   12.70    4.80
  -5  13  -1    8.60    5.40
  -5  13  -1    1.70    5.00
  -5  13  -1    4.90    5.00
   5 -13   1    4.30    2.70
   5 -13   1    3.40    2.80
  -6  13  -1    4.40    5.30
  -6  13  -1    4.50    5.60
  -6  13  -1    3.50    5.60
  -6  13  -1   -3.00    5.40
  -7  13  -1   77.39    9.30
  -7  13  -1   85.19   10.40
  -7  13  -1   74.79    9.40
   7 -13   1   77.09    9.60
  -8  13  -1   66.69    9.60
  -8  13  -1   53.49    8.90
  -8  13  -1   63.49    9.40
   8 -13   1   68.89    6.50
  -9  13  -1    0.40    6.90
  -9  13  -1   17.00    7.60
  -9  13  -1    3.40    7.50
 -10  13  -1   -3.60    7.00
 -10  13  -1   -1.10    7.90
 -10  13  -1   -5.00    7.00
 -11  13  -1   30.20    9.90
 -11  13  -1   24.40    9.70
 -11  13  -1   37.60    9.30
   7  12  -1    1.80    6.70
   7  12  -1   37.30   11.60
   7  12  -1    7.50   11.10
   7  12  -1    9.50    7.10
   6  12  -1   -4.10    5.60
   6  12  -1    6.20   10.30
   6  12  -1   -0.10    6.00
   6  12  -1   29.30   11.30
   5  12  -1   18.50    6.00
   5  12  -1   37.60   12.10
   5  12  -1    8.50    6.50
   5  12  -1   -2.30    9.50
   5  12  -1    0.10    7.50
   4  12  -1   41.70    6.70
   4  12  -1   42.90    6.90
   4  12  -1   53.39    7.20
   4  12  -1   27.20    9.80
   4  12  -1   27.40    9.10
   4  12  -1   73.39   12.00
   3  12  -1  109.79   10.10
   3  12  -1  126.09   14.40
   3  12  -1  121.89   13.10
   3  12  -1  121.49   10.30
   3  12  -1   63.09   12.50
   3  12  -1  127.19    9.80
   2  12  -1    6.40    8.10
   2  12  -1   -5.10    4.10
   2  12  -1    0.00    3.90
   2  12  -1    5.80    4.50
   2  12  -1   -4.60    5.60
   1  12  -1   -3.50    3.70
   1  12  -1    0.60    4.10
   1  12  -1   -0.70    3.60
   1  12  -1   -2.10    3.80
   1  12  -1    6.50    8.30
   1  12  -1    1.70    4.60
   1  12  -1    1.60    5.10
   1  12  -1    0.30    3.70
   0  12  -1   17.90    5.40
   0  12  -1   21.30    4.40
   0  12  -1   13.60    5.00
   0  12  -1   27.80    8.70
   0  12  -1   18.70    4.00
   0  12  -1   20.10    6.30
   0  12  -1   17.40    4.30
   0  12  -1   17.80    4.40
  -1  12  -1  258.77   14.40
  -1  12  -1  268.97   16.10
  -1  12  -1  267.57   13.90
  -1  12  -1  266.97   14.10
  -1  12  -1  259.87   14.30
  -1  12  -1  249.68   15.10
  -1  12  -1  292.57   21.00
  -2  12  -1  223.48   12.70
  -2  12  -1  189.68   12.50
  -2  12  -1  223.98   13.50
  -2  12  -1  230.98   12.40
  -2  12  -1  205.98   12.50
  -2  12  -1  230.58   18.80
  -2  12  -1  202.08   13.30
  -3  12  -1    0.10    7.60
  -3  12  -1    2.30    3.40
  -3  12  -1   -4.20    3.70
  -3  12  -1   -2.10    3.80
  -3  12  -1    0.80    3.70
  -3  12  -1    4.40    3.60
  -3  12  -1    3.30    3.90
  -4  12  -1  154.28   11.30
  -4  12  -1  146.19   11.20
  -4  12  -1  141.49   11.30
  -4  12  -1  156.38   10.70
  -4  12  -1  136.99   10.60
  -4  12  -1  172.48   10.10
   4 -12   1  157.58    8.30
   4 -12   1  152.48    8.20
  -5  12  -1  116.19    6.90
  -5  12  -1   93.69    9.10
  -5  12  -1   91.69    8.80
  -5  12  -1   92.99    8.80
  -5  12  -1   67.89    7.90
  -5  12  -1   88.19    8.90
   5 -12   1   92.09    6.70
   5 -12   1   87.29    7.00
  -6  12  -1   10.10    5.30
  -6  12  -1   11.10    5.70
  -6  12  -1    5.90    5.50
  -6  12  -1    7.20    5.50
  -6  12  -1    5.10    5.50
   6 -12   1    4.00    2.80
   6 -12   1   10.70    3.70
   6 -12   1   12.10    4.30
  -7  12  -1   22.80    6.60
  -7  12  -1    3.90    5.80
  -7  12  -1    4.40    6.00
  -7  12  -1   14.50    6.40
   7 -12   1    6.80    5.70
   7 -12   1    8.10    4.20
   7 -12   1   21.40    4.30
  -8  12  -1   33.50    7.90
  -8  12  -1   29.50    7.50
  -8  12  -1   40.00    7.70
   8 -12   1   46.00    6.00
   8 -12   1   29.70    5.30
  -9  12  -1   -1.10    6.80
  -9  12  -1   10.70    7.70
  -9  12  -1    9.50    7.10
   9 -12   1    1.70    4.70
 -10  12  -1    1.30    7.50
 -10  12  -1   11.00    7.50
 -10  12  -1   -2.20    6.80
  10 -12   1   -1.60    5.10
 -11  12  -1   10.90    8.20
 -11  12  -1   16.20    8.60
 -11  12  -1    7.30    9.00
  11 -12   1    8.00    7.70
 -12  12  -1    7.50    8.80
 -12  12  -1    2.40    8.50
 -12  12  -1   15.80    9.40
   8  11  -1   24.70   11.20
   8  11  -1   31.50   11.70
   8  11  -1   22.30    7.90
   8  11  -1   30.30    8.30
   7  11  -1  -11.70    5.90
   7  11  -1   -2.70    5.80
   7  11  -1    5.20    9.40
   7  11  -1  -13.40    8.50
   6  11  -1    6.10    8.90
   6  11  -1   10.30    9.70
   6  11  -1  -12.00    7.40
   6  11  -1   -4.20    5.60
   6  11  -1   -3.90    5.40
   5  11  -1    7.00    9.00
   5  11  -1   -4.30    8.60
   5  11  -1    1.30    5.20
   5  11  -1    3.80    5.20
   5  11  -1    5.10    7.50
   5  11  -1    3.20    5.40
  -5 -11   1   -2.80    2.50
   4  11  -1   95.89    8.70
   4  11  -1   87.49    6.90
   4  11  -1   75.59    8.50
   4  11  -1   95.79   13.60
   4  11  -1   76.79   11.00
   4  11  -1   98.19    8.90
   4  11  -1  103.49   12.90
  -4 -11   1   91.59    5.70
  -4 -11   1   80.89   11.00
  -4 -11   1   91.19    5.70
   3  11  -1   13.80    6.60
   3  11  -1   11.80    3.70
   3  11  -1    8.90    4.70
   3  11  -1    6.80    4.70
   3  11  -1    7.00    4.60
   3  11  -1   15.30    4.80
   3  11  -1   17.40    8.50
   3  11  -1   27.60    8.90
  -3 -11   1   12.10    6.90
   2  11  -1   88.79    8.20
   2  11  -1   85.19    7.70
   2  11  -1   68.09    9.30
   2  11  -1   69.29    6.90
   2  11  -1   58.39    6.70
   2  11  -1   84.89   11.40
   1  11  -1  177.38   11.10
   1  11  -1  177.28   10.90
   1  11  -1  199.18   16.70
   1  11  -1  182.88   12.00
   1  11  -1  175.68   10.90
   1  11  -1  175.18   10.50
   1  11  -1  187.58   12.20
   1  11  -1  190.68   14.30
   0  11  -1  159.98   12.90
   0  11  -1  170.08   10.00
   0  11  -1  154.28   15.80
   0  11  -1  158.68    9.70
   0  11  -1  143.19    9.90
   0  11  -1  157.38    9.80
   0  11  -1  168.68   11.20
  -1  11  -1  116.49    8.10
  -1  11  -1  111.79    8.10
  -1  11  -1  104.79   12.20
  -1  11  -1  127.79    9.00
  -1  11  -1  121.79    9.70
  -1  11  -1  131.39   10.40
  -1  11  -1  121.99    8.60
  -2  11  -1   26.50    4.60
  -2  11  -1   32.30    5.30
  -2  11  -1   24.90    5.20
  -2  11  -1   18.50    8.30
  -2  11  -1   24.80    4.30
  -2  11  -1   18.40    4.20
  -2  11  -1   22.50    4.10
  -3  11  -1   35.80    5.10
  -3  11  -1   30.10    5.10
  -3  11  -1   31.00    5.40
  -3  11  -1   23.80    4.70
  -3  11  -1   38.00    5.00
  -3  11  -1   32.30    4.80
   3 -11   1   33.20    3.10
   3 -11   1   32.50    3.10
  -4  11  -1    9.80    4.20
  -4  11  -1    5.50    4.10
  -4  11  -1   -1.40    4.20
  -4  11  -1    9.80    3.50
  -4  11  -1    3.30    4.40
  -4  11  -1    3.80    4.10
   4 -11   1    4.30    2.60
   4 -11   1    4.10    2.70
  -5  11  -1   30.60    5.90
  -5  11  -1   32.70    3.70
  -5  11  -1   24.60    5.80
  -5  11  -1   31.50    5.60
  -5  11  -1   16.90    5.10
  -5  11  -1   26.20    5.60
   5 -11   1   26.30    4.00
   5 -11   1   33.00    3.50
   5 -11   1   25.30    4.20
  -6  11  -1  200.08   13.70
  -6  11  -1  179.88   13.40
  -6  11  -1  174.88   13.00
  -6  11  -1  205.58   12.80
  -6  11  -1  180.58   13.10
   6 -11   1  191.68   10.60
   6 -11   1  177.88   11.30
   6 -11   1  159.28   11.00
   6 -11   1  206.88   13.50
  -7  11  -1    5.30    5.70
  -7  11  -1    6.90    5.90
  -7  11  -1    7.50    5.50
  -7  11  -1   -1.10    5.40
  -7  11  -1    0.00    5.40
   7 -11   1    5.80    5.50
   7 -11   1    5.70    3.90
   7 -11   1    2.00    4.00
  -8  11  -1    9.90    5.80
  -8  11  -1    4.80    6.00
  -8  11  -1    3.00    5.80
  -8  11  -1   -8.80    5.80
  -8  11  -1    3.30    5.10
   8 -11   1   11.10    4.60
   8 -11   1    7.40    4.60
  -9  11  -1   51.09    9.70
  -9  11  -1   42.20    8.00
  -9  11  -1   40.40    8.20
   9 -11   1   47.30    6.70
   9 -11   1   38.80    6.90
 -10  11  -1    9.60    7.80
 -10  11  -1   10.70    7.30
 -10  11  -1    5.70    7.20
  10 -11   1    7.50    5.60
 -11  11  -1   55.09   10.90
 -11  11  -1   57.79   10.20
 -11  11  -1   76.39   11.10
  11 -11   1   64.39    9.20
 -12  11  -1   27.90    9.20
 -12  11  -1   42.20   10.50
 -12  11  -1   25.00    9.60
  12 -11   1   32.20    8.00
 -13  11  -1   40.10   12.10
 -13  11  -1   31.30   10.30
 -13  11  -1   42.80   10.30
  13 -11   1   53.49    9.70
   9  10  -1   41.40    8.90
   9  10  -1   19.70    8.50
   9  10  -1   35.80   11.60
   9  10  -1   33.50   12.00
   8  10  -1   -2.50    6.80
   8  10  -1    4.30    9.00
   8  10  -1   12.80   10.00
   8  10  -1    5.60    6.50
   7  10  -1    8.40    9.70
   7  10  -1   22.10    9.30
   7  10  -1    9.40    6.50
   7  10  -1   -2.70    8.30
   7  10  -1    5.80    6.20
   6  10  -1   32.60    6.90
   6  10  -1   32.60    6.90
   6  10  -1   32.60   10.10
   6  10  -1   31.40    6.80
   6  10  -1   36.30    9.70
   6  10  -1   18.40    8.80
   6  10  -1   27.50    7.50
   5  10  -1   -6.10    6.90
   5  10  -1    0.00    8.00
   5  10  -1   -1.70    5.00
   5  10  -1   -0.60    8.00
   5  10  -1   -2.80    4.70
   5  10  -1    0.10    4.70
   5  10  -1   -2.30    2.40
   5  10  -1   -5.10    4.50
  -5 -10   1   -1.70    2.40
  -5 -10   1   13.80    8.10
  -5 -10   1   -4.40    2.90
   4  10  -1    2.40    4.70
   4  10  -1   15.40    5.10
   4  10  -1   12.30    6.80
   4  10  -1   20.40    8.20
   4  10  -1   16.30    7.50
   4  10  -1   11.90    5.00
   4  10  -1   12.30    3.30
   4  10  -1    8.90    4.80
  -4 -10   1    9.30    3.00
  -4 -10   1   10.70    6.40
  -4 -10   1   12.30    3.10
   3  10  -1  118.39   12.70
   3  10  -1  110.29   13.00
   3  10  -1  122.99    9.40
   3  10  -1  123.79    9.70
   3  10  -1  119.79    9.10
   3  10  -1  107.89    9.70
   3  10  -1  128.29   13.50
   3  10  -1  141.09    8.80
  -3 -10   1  127.59    6.90
  -3 -10   1  104.89   11.50
  -3 -10   1  125.89    6.90
   2  10  -1    7.60    5.80
   2  10  -1    7.60    6.90
   2  10  -1    7.90    3.90
   2  10  -1    7.10    3.80
   2  10  -1    3.90    3.50
   2  10  -1    7.30    4.10
   2  10  -1    7.50    3.80
  -2 -10   1    0.30    5.20
   1  10  -1   11.00    5.60
   1  10  -1    9.20    3.80
   1  10  -1   13.30    3.60
   1  10  -1    8.30    3.50
   1  10  -1    5.90    3.50
   1  10  -1   11.50    4.20
   1  10  -1   19.10    7.40
   0  10  -1   22.90    3.90
   0  10  -1   11.50    3.80
   0  10  -1   17.80    3.70
   0  10  -1   14.90    3.30
   0  10  -1   21.60    5.40
   0  10  -1   19.00    7.70
   0  10  -1   19.70    4.70
  -1  10  -1    4.30    3.20
  -1  10  -1    6.70    3.30
  -1  10  -1    3.70    4.10
  -1  10  -1    6.50    3.30
  -1  10  -1    0.40    3.80
  -1  10  -1    2.60    6.50
  -1  10  -1    4.90    3.00
  -2  10  -1    6.90    3.70
  -2  10  -1   11.10    3.90
  -2  10  -1    9.70    3.30
  -2  10  -1    5.70    3.50
  -2  10  -1    8.70    4.00
  -2  10  -1    9.60    3.50
   2 -10   1    8.90    1.70
  -3  10  -1   60.79    6.40
  -3  10  -1   58.39    5.90
  -3  10  -1   43.30    5.40
  -3  10  -1   56.59    5.50
  -3  10  -1   40.90    5.20
  -3  10  -1   51.89    6.10
   3 -10   1   56.09    4.50
   3 -10   1   46.90    4.50
  -4  10  -1  106.09    9.10
  -4  10  -1  121.09    9.30
  -4  10  -1  128.19    8.20
  -4  10  -1  129.09    9.10
  -4  10  -1  123.39    9.80
  -4  10  -1  125.59    9.30
   4 -10   1  130.99    6.60
   4 -10   1  126.39    7.80
   4 -10   1  114.09    6.40
  -5  10  -1    8.50    4.60
  -5  10  -1   10.90    4.40
  -5  10  -1    7.80    4.50
  -5  10  -1    9.20    4.40
  -5  10  -1    6.00    2.40
  -5  10  -1    9.90    4.20
   5 -10   1    6.70    2.90
   5 -10   1    7.00    3.40
   5 -10   1    8.60    4.60
   5 -10   1    2.90    3.20
  -6  10  -1   55.79    6.90
  -6  10  -1   50.69    6.60
  -6  10  -1   46.10    7.20
  -6  10  -1   48.50    6.80
  -6  10  -1   37.80    6.50
   6 -10   1   52.89    5.90
   6 -10   1   52.79    5.40
   6 -10   1   59.09    7.20
   6 -10   1   47.90    5.80
  -7  10  -1    4.20    6.00
  -7  10  -1    8.90    5.20
  -7  10  -1   12.30    5.60
  -7  10  -1    8.60    5.20
  -7  10  -1    2.90    5.60
  -7  10  -1    6.40    5.50
   7 -10   1    4.20    4.10
   7 -10   1    9.30    4.60
   7 -10   1    3.60    5.10
  -8  10  -1   -5.60    9.00
  -8  10  -1    3.20    5.50
  -8  10  -1   -2.70    5.20
  -8  10  -1    8.00    6.10
  -8  10  -1    7.40    6.30
  -8  10  -1   -3.00    5.60
   8 -10   1    1.50    4.60
   8 -10   1   -2.00    4.20
  -9  10  -1  139.39   13.00
  -9  10  -1  114.29   11.40
  -9  10  -1  107.89   11.20
  -9  10  -1  150.78   14.00
  -9  10  -1  123.39   12.80
   9 -10   1  117.09   11.30
   9 -10   1  133.19   10.90
 -10  10  -1   43.30    8.60
 -10  10  -1   33.40    8.60
 -10  10  -1   43.10    8.50
 -10  10  -1   31.70    8.90
  10 -10   1   24.10    6.50
  10 -10   1   31.20    6.70
 -11  10  -1   -3.90    7.60
 -11  10  -1    3.10    7.60
 -11  10  -1   -5.40    7.40
  11 -10   1    3.90    6.40
 -12  10  -1   11.50    9.10
 -12  10  -1   32.70    9.70
 -12  10  -1   21.60    9.20
  12 -10   1   35.10    8.60
 -13  10  -1   -5.00    8.30
 -13  10  -1    0.90    8.80
 -13  10  -1   -2.90    9.60
  13 -10   1   15.80    8.20
 -14  10  -1   -3.20    9.40
 -14  10  -1    0.90    9.40
 -14  10  -1   -9.60    8.20
  14 -10   1   -1.60    8.10
  10   9  -1   -0.60    8.10
  10   9  -1   -4.60    7.20
  10   9  -1    5.40    9.50
  10   9  -1    3.20   10.20
   9   9  -1   39.00    9.20
   9   9  -1   35.20    8.80
   9   9  -1   24.10   10.80
   9   9  -1   37.00   11.20
   8   9  -1    3.20    6.30
   8   9  -1    2.10    9.30
   8   9  -1   11.80    9.30
   8   9  -1   17.10    7.30
   8   9  -1    8.10    9.40
   7   9  -1   -8.00    7.30
   7   9  -1   -3.60    7.80
   7   9  -1    6.20    5.90
   7   9  -1   -4.10    5.70
   7   9  -1   -2.50    7.70
  -7  -9   1    5.70    3.50
  -7  -9   1    2.20    4.20
   6   9  -1   14.30    8.10
   6   9  -1   19.30    8.10
   6   9  -1   21.30    8.20
   6   9  -1   13.10    5.50
   6   9  -1   11.50    6.00
   6   9  -1   16.90    5.80
   6   9  -1   21.80   10.10
   6   9  -1   15.40    5.70
   6   9  -1    7.50    2.60
  -6  -9   1   13.80    4.00
  -6  -9   1   11.80    3.40
   5   9  -1   58.49    7.20
   5   9  -1   70.29   11.40
   5   9  -1   66.69    8.00
   5   9  -1   54.89    7.00
   5   9  -1   62.49    9.70
   5   9  -1   62.29    7.60
   5   9  -1   70.89    7.60
   5   9  -1   53.49    5.50
   5   9  -1   54.89    9.60
  -5  -9   1   60.89    9.50
  -5  -9   1   61.19    6.20
  -5  -9   1   75.49    5.40
  -5  -9   1   68.09    6.20
   4   9  -1  306.97   22.30
   4   9  -1  343.57   16.80
   4   9  -1  347.67   18.30
   4   9  -1  353.56   22.40
   4   9  -1  397.86   22.00
   4   9  -1  346.17   18.50
   4   9  -1  378.66   18.10
   4   9  -1  344.77   18.40
  -4  -9   1  336.77   21.20
  -4  -9   1  359.26   16.70
  -4  -9   1  355.76   15.40
   3   9  -1   21.70    8.20
   3   9  -1   34.20    4.20
   3   9  -1   27.20    4.60
   3   9  -1   28.30    6.80
   3   9  -1   24.20    4.90
   3   9  -1   25.50    4.60
   3   9  -1    9.50    6.40
   3   9  -1   25.90    4.90
  -3  -9   1   31.20    3.30
  -3  -9   1   23.90    6.40
  -3  -9   1   25.60    3.30
   2   9  -1   13.20    3.60
   2   9  -1   13.60    5.90
   2   9  -1   15.10    4.00
   2   9  -1   18.10    4.10
   2   9  -1   15.00    3.80
   2   9  -1   15.90    6.90
   2   9  -1   15.80    4.10
  -2  -9   1   15.80    2.30
  -2  -9   1   16.40    2.30
  -2  -9   1   32.80    6.20
   1   9  -1   25.90    6.80
   1   9  -1   29.70    4.80
   1   9  -1   20.80    3.60
   1   9  -1   23.20    3.90
   1   9  -1   19.00    3.70
   1   9  -1   27.30    4.10
   1   9  -1   23.80    5.80
  -1  -9   1   21.30    5.50
   0   9  -1   63.89    5.30
   0   9  -1   55.59    4.90
   0   9  -1   56.69    6.30
   0   9  -1   58.79    8.80
   0   9  -1   60.89    5.70
   0   9  -1   50.59    6.80
   0   9  -1   53.29    5.00
  -1   9  -1  124.99   12.00
  -1   9  -1  132.69    8.10
  -1   9  -1  124.79    7.80
  -1   9  -1  129.09   10.00
  -1   9  -1  126.59    8.00
  -1   9  -1  118.99    8.70
  -1   9  -1  132.29    7.90
  -2   9  -1   -5.30    2.80
  -2   9  -1   -0.60    3.20
  -2   9  -1    1.70    3.30
  -2   9  -1    2.00    3.00
  -2   9  -1   -1.30    2.70
  -2   9  -1   -1.30    3.10
   2  -9   1   -0.30    1.90
   2  -9   1   -1.10    1.70
  -3   9  -1   85.99    7.40
  -3   9  -1   93.39    7.10
  -3   9  -1   82.39    7.80
  -3   9  -1   88.59    7.40
  -3   9  -1  104.99    7.30
  -3   9  -1   83.89    7.50
   3  -9   1   88.49    6.10
   3  -9   1   85.89    5.80
  -4   9  -1   29.30    5.30
  -4   9  -1   35.30    5.00
  -4   9  -1   31.80    3.90
  -4   9  -1   32.80    5.00
  -4   9  -1   27.70    4.90
  -4   9  -1   28.60    4.60
   4  -9   1   29.50    5.30
   4  -9   1   35.70    3.40
   4  -9   1   34.00    3.40
   4  -9   1   38.30    4.20
   4  -9   1   31.50    4.00
  -5   9  -1  103.39    8.80
  -5   9  -1   74.59    7.40
  -5   9  -1   87.19    8.30
  -5   9  -1   87.49    8.50
  -5   9  -1   94.49    5.60
  -5   9  -1   87.79    8.40
   5  -9   1   87.49    6.90
   5  -9   1   89.99    7.40
   5  -9   1   92.49    8.70
   5  -9   1   71.19    7.10
   5  -9   1   88.99    6.90
  -6   9  -1  307.37   18.30
  -6   9  -1  343.57   18.20
  -6   9  -1  319.67   18.00
  -6   9  -1  352.86   18.20
  -6   9  -1  334.27   17.70
   6  -9   1  337.97   16.90
   6  -9   1  335.47   18.20
   6  -9   1  334.97   16.90
   6  -9   1  315.97   16.80
  -7   9  -1   -2.00    5.00
  -7   9  -1   10.90    5.50
  -7   9  -1    3.10    5.40
  -7   9  -1    9.10    5.40
  -7   9  -1   14.00    5.60
  -7   9  -1    7.70    5.60
   7  -9   1   11.60    4.20
   7  -9   1    5.70    4.20
   7  -9   1   10.50    4.70
   7  -9   1   11.30    5.60
  -8   9  -1   14.40    6.30
  -8   9  -1   23.00    6.50
  -8   9  -1   22.30    6.20
  -8   9  -1   24.90    6.70
  -8   9  -1   17.00    6.50
  -8   9  -1   31.70    6.80
   8  -9   1    4.30    4.60
   8  -9   1   23.30    7.00
   8  -9   1   25.30    5.30
  -9   9  -1  123.29   11.80
  -9   9  -1   90.39   11.00
  -9   9  -1   82.09   10.10
  -9   9  -1   95.29   10.60
  -9   9  -1  102.79   11.00
  -9   9  -1   96.29   10.70
   9  -9   1  110.79   10.10
   9  -9   1  100.79    9.50
 -10   9  -1   12.70    6.70
 -10   9  -1   13.10    3.10
 -10   9  -1   15.50    7.50
 -10   9  -1    4.90    7.30
 -10   9  -1   13.00    7.10
 -10   9  -1    9.60    7.60
  10  -9   1    3.20    5.20
  10  -9   1    8.80    6.30
 -11   9  -1   -2.40    7.30
 -11   9  -1    2.90    7.70
 -11   9  -1   -8.40    6.90
 -11   9  -1   13.40    7.90
  11  -9   1   -5.10    6.00
  11  -9   1    0.80    5.00
 -12   9  -1   14.70    9.20
 -12   9  -1    4.90    8.10
 -12   9  -1    8.30    8.10
  12  -9   1    7.80    7.60
 -13   9  -1    4.30    9.50
 -13   9  -1   20.90   10.20
 -13   9  -1   30.40    9.90
  13  -9   1   33.60    9.50
 -14   9  -1   -6.80    8.80
 -14   9  -1   -6.00    9.50
 -14   9  -1   -4.00    9.20
  14  -9   1  -13.10    7.10
  11   8  -1    2.60    8.10
  11   8  -1   30.80   11.00
  11   8  -1    1.40    8.20
  11   8  -1   15.50   11.00
  10   8  -1   -0.80    8.50
  10   8  -1    1.60    7.30
  10   8  -1    9.40    9.90
  10   8  -1   -0.60    7.20
   9   8  -1   -2.30    6.60
   9   8  -1   -3.70    7.90
   9   8  -1  -12.40    7.90
   9   8  -1   -8.00    7.80
   9   8  -1   15.80    7.60
  -9  -8   1   -4.90    5.10
   8   8  -1   15.80    7.00
   8   8  -1   29.10    7.50
   8   8  -1   16.80    9.20
   8   8  -1   32.80    9.30
   8   8  -1   19.80    8.70
  -8  -8   1   35.00    5.80
  -8  -8   1   27.50    5.90
   7   8  -1    1.50    5.10
   7   8  -1   -0.80    5.80
   7   8  -1    4.70    7.30
   7   8  -1   -5.00    6.40
   7   8  -1    3.00    5.50
   7   8  -1    7.50    5.80
   7   8  -1    7.90    5.70
   7   8  -1   16.10    7.80
  -7  -8   1    9.00    4.40
  -7  -8   1   -8.20    3.50
   6   8  -1   10.80    7.20
   6   8  -1    3.00    5.20
   6   8  -1    1.50    5.00
   6   8  -1   -1.20    4.90
   6   8  -1    4.70    6.60
   6   8  -1    7.10    2.80
   6   8  -1    8.20    4.90
   6   8  -1    0.90    5.30
   6   8  -1   -0.20    6.60
  -6  -8   1   -1.70    3.70
  -6  -8   1    3.40    6.70
  -6  -8   1    2.20    3.30
  -6  -8   1  -10.00    5.80
   5   8  -1   26.80    5.70
   5   8  -1   16.90    6.70
   5   8  -1   23.30    5.40
   5   8  -1   24.20    8.00
   5   8  -1   21.80    5.20
   5   8  -1   19.50    5.10
   5   8  -1    5.80    7.70
   5   8  -1   20.70    3.30
  -5  -8   1   23.30    4.30
  -5  -8   1   31.30    8.30
  -5  -8   1   27.00    7.20
  -5  -8   1   30.40    3.90
  -5  -8   1   16.20    4.00
   4   8  -1   11.90    6.40
   4   8  -1   10.30    4.10
   4   8  -1    9.20    5.80
   4   8  -1    5.00    4.20
   4   8  -1    2.20    4.00
   4   8  -1    1.60    2.70
   4   8  -1    6.00    4.10
   4   8  -1   11.30    6.50
  -4  -8   1    6.90    3.20
  -4  -8   1    7.50    2.80
  -4  -8   1    8.70    2.90
  -4  -8   1    8.30    2.70
  -4  -8   1   10.90    5.90
  -4  -8   1    1.50    5.20
   3   8  -1  202.98   14.90
   3   8  -1  198.08   14.40
   3   8  -1  212.28   12.20
   3   8  -1  214.98   12.30
   3   8  -1  218.28   12.20
   3   8  -1  201.88   12.10
   3   8  -1  230.78   11.50
   3   8  -1  231.08   16.60
  -3  -8   1  192.78   10.50
  -3  -8   1  214.78    9.60
  -3  -8   1  213.98   10.80
  -3  -8   1  227.58    9.60
  -3  -8   1  221.28   15.00
   2   8  -1   84.59    7.10
   2   8  -1   99.09    7.20
   2   8  -1  110.49    7.70
   2   8  -1   94.89    7.40
   2   8  -1   92.09    9.90
   2   8  -1   98.79    7.10
   2   8  -1   98.69   10.60
  -2  -8   1   95.79    5.70
  -2  -8   1   89.89    9.90
  -2  -8   1   97.49    5.70
   1   8  -1    5.20    3.00
   1   8  -1    1.70    2.80
   1   8  -1    6.80    5.40
   1   8  -1    9.80    3.70
   1   8  -1    1.90    2.40
   1   8  -1    8.70    3.10
   1   8  -1   -1.20    4.10
  -1  -8   1    2.00    4.00
  -1  -8   1    2.60    1.60
  -1  -8   1    3.60    1.50
   0   8  -1   65.09    6.40
   0   8  -1   45.00    4.10
   0   8  -1   40.70    5.60
   0   8  -1   36.60    7.30
   0   8  -1   40.10    3.90
   0   8  -1   44.50    4.40
   0   8  -1   36.60    3.90
  -1   8  -1   75.59    9.50
  -1   8  -1   86.29    7.50
  -1   8  -1   83.39    7.80
  -1   8  -1   88.99    6.00
  -1   8  -1   89.69    6.20
  -1   8  -1   82.09    6.10
  -1   8  -1   90.59    6.40
   1  -8   1   92.19    4.50
  -2   8  -1  248.48   13.00
  -2   8  -1  243.28   13.20
  -2   8  -1  235.28   12.40
  -2   8  -1  260.37   12.50
  -2   8  -1  231.58   12.30
  -2   8  -1  246.38   12.50
   2  -8   1  256.47   11.40
   2  -8   1  249.78   11.40
  -3   8  -1  117.99    7.50
  -3   8  -1  104.29    7.70
  -3   8  -1  106.09    7.80
  -3   8  -1   93.69    7.60
  -3   8  -1  119.29    8.40
  -3   8  -1  108.49    7.60
   3  -8   1  103.59    5.90
   3  -8   1  108.89    5.90
   3  -8   1  109.89    6.70
  -4   8  -1   21.70    4.80
  -4   8  -1   29.40    4.90
  -4   8  -1   17.60    4.20
  -4   8  -1   30.00    4.60
  -4   8  -1   29.00    3.30
  -4   8  -1   21.50    4.20
   4  -8   1   33.80    4.20
   4  -8   1   25.70    3.80
   4  -8   1   24.70    3.30
   4  -8   1   27.30    5.10
   4  -8   1   25.90    3.40
  -5   8  -1  212.78   10.30
  -5   8  -1  224.48   10.40
  -5   8  -1  239.78   13.10
  -5   8  -1  225.78   13.20
  -5   8  -1  231.08   13.40
  -5   8  -1  214.28   12.70
  -5   8  -1  227.38   13.10
   5  -8   1  226.98   11.90
   5  -8   1  207.68   11.80
   5  -8   1  213.48   11.80
   5  -8   1  216.08   13.40
   5  -8   1  214.58   12.20
  -6   8  -1  255.07   14.60
  -6   8  -1  262.47   14.80
  -6   8  -1  246.88   15.70
  -6   8  -1  247.68   15.50
  -6   8  -1  242.08   15.10
  -6   8  -1  249.18   15.20
  -6   8  -1  257.67   11.50
   6  -8   1  260.17   14.30
   6  -8   1  269.77   15.80
   6  -8   1  259.67   14.00
   6  -8   1  248.68   13.80
   6  -8   1  284.47   14.40
  -7   8  -1  336.47   19.90
  -7   8  -1  381.06   20.10
  -7   8  -1  364.86   19.90
  -7   8  -1  350.36   19.70
  -7   8  -1  374.36   19.50
  -7   8  -1  340.57   20.40
  -7   8  -1  366.96   16.00
   7  -8   1  378.66   18.80
   7  -8   1  347.57   18.50
   7  -8   1  387.86   20.20
   7  -8   1  354.46   18.40
   7  -8   1  355.96   18.90
  -8   8  -1  176.88   13.00
  -8   8  -1  159.08    8.60
  -8   8  -1  169.88   13.50
  -8   8  -1  161.48   12.50
  -8   8  -1  176.18   13.00
  -8   8  -1  158.78   12.60
  -8   8  -1  174.78   13.30
   8  -8   1  175.88   13.30
   8  -8   1  150.98   12.00
   8  -8   1  141.69   11.70
  -9   8  -1   47.90    4.60
  -9   8  -1   51.49    8.20
  -9   8  -1   56.79    8.10
  -9   8  -1   60.79    9.10
  -9   8  -1   47.90    7.90
  -9   8  -1   58.89    9.00
  -9   8  -1   63.19    8.70
   9  -8   1   49.40    7.70
   9  -8   1   53.39    7.50
 -10   8  -1   56.79    8.70
 -10   8  -1   67.69    6.90
 -10   8  -1   82.79   10.40
 -10   8  -1   62.39    9.40
 -10   8  -1   64.19   11.00
 -10   8  -1   76.59   10.60
 -10   8  -1   64.19    9.30
  10  -8   1   57.19    9.00
 -11   8  -1   80.39    8.00
 -11   8  -1   69.29   10.70
 -11   8  -1   89.49   11.30
 -11   8  -1   81.29   11.10
  11  -8   1   87.29   10.00
  11  -8   1   62.59    9.20
 -12   8  -1    6.90    7.90
 -12   8  -1  -10.50    7.30
 -12   8  -1   -5.30    6.50
  12  -8   1    0.60    6.70
  12  -8   1   -5.70    6.50
 -13   8  -1   -2.50    8.40
 -13   8  -1   -3.20    8.80
 -13   8  -1    0.90    8.80
  13  -8   1    5.10    8.10
 -14   8  -1   -3.00    9.40
 -14   8  -1   -2.80    8.40
 -14   8  -1    0.70    9.00
  14  -8   1    5.10    7.80
  11   7  -1   57.39   11.70
  11   7  -1   19.80    8.90
  11   7  -1   44.20   11.70
  11   7  -1   16.70    9.20
  10   7  -1   21.30    9.10
  10   7  -1   27.00    9.70
  10   7  -1   28.60   11.50
  10   7  -1   35.40    8.70
  10   7  -1   35.60   10.40
 -10  -7   1   19.20    6.30
   9   7  -1   13.80    7.90
   9   7  -1    0.60    6.70
   9   7  -1    2.50    8.00
   9   7  -1    9.90    9.10
   9   7  -1   -0.20    6.60
  -9  -7   1    7.10    5.30
  -9  -7   1    7.10    3.10
   8   7  -1    6.90    7.20
   8   7  -1    8.40    7.30
   8   7  -1    2.40    6.20
   8   7  -1    3.90    6.30
   8   7  -1    6.90    5.90
   8   7  -1   -4.20    7.40
   8   7  -1   -1.70    5.70
  -8  -7   1   -6.30    4.00
  -8  -7   1    5.40    3.30
  -8  -7   1    8.80    4.70
   7   7  -1   28.10    6.60
   7   7  -1   22.60    8.60
   7   7  -1   29.50    8.20
   7   7  -1   23.00    6.20
   7   7  -1   25.20    6.50
   7   7  -1   33.40    7.40
   7   7  -1   34.20    6.90
   7   7  -1   19.00    7.70
  -7  -7   1   15.10    7.00
  -7  -7   1   29.30    5.30
  -7  -7   1   26.20    5.30
  -7  -7   1   23.00    3.70
   6   7  -1   25.70    8.30
   6   7  -1   29.10    5.90
   6   7  -1   24.20    5.90
   6   7  -1   19.60    7.10
   6   7  -1   24.60    3.70
   6   7  -1   34.30    7.60
   6   7  -1   31.00    6.60
   6   7  -1   25.70    5.90
   6   7  -1   22.50    6.00
  -6  -7   1   22.90    6.50
  -6  -7   1   27.40    8.00
  -6  -7   1   30.70    4.70
  -6  -7   1   30.90    5.00
  -6  -7   1   26.80    5.00
   5   7  -1   -0.90    6.40
   5   7  -1    2.50    4.00
   5   7  -1   -1.50    4.00
   5   7  -1   -9.60    3.70
   5   7  -1   -0.10    2.50
   5   7  -1    0.90    4.30
   5   7  -1    5.60    6.30
   5   7  -1    1.10    5.40
  -5  -7   1    2.90    5.70
  -5  -7   1    6.10    3.30
  -5  -7   1    2.30    5.20
  -5  -7   1   -8.10    3.00
  -5  -7   1    0.50    3.00
   4   7  -1   10.10    2.80
   4   7  -1   10.60    4.10
   4   7  -1    5.90    4.00
   4   7  -1    9.70    5.50
   4   7  -1   10.00    5.50
   4   7  -1    7.10    5.70
   4   7  -1    7.40    3.90
   4   7  -1    3.00    4.10
  -4  -7   1    7.20    4.90
  -4  -7   1    5.50    5.30
  -4  -7   1    8.30    3.20
  -4  -7   1    8.10    3.30
  -4  -7   1   11.90    2.90
  -4  -7   1    7.60    2.80
   3   7  -1   31.00    4.40
   3   7  -1   31.10    3.60
   3   7  -1   26.40    4.50
   3   7  -1   28.30    4.40
   3   7  -1   25.30    6.20
   3   7  -1   21.70    4.30
   3   7  -1   40.90    6.70
   3   7  -1   24.80    6.40
  -3  -7   1   21.80    5.70
  -3  -7   1   37.40    3.60
  -3  -7   1   26.50    2.90
  -3  -7   1   36.20    6.50
  -3  -7   1   30.90    3.60
   2   7  -1   -0.30    2.90
   2   7  -1   -0.30    4.90
   2   7  -1    0.10    2.90
   2   7  -1    1.20    3.00
   2   7  -1   -2.10    4.10
   2   7  -1    6.10    2.90
   2   7  -1   -0.50    2.60
  -2  -7   1    1.20    2.10
  -2  -7   1   -0.20    2.10
  -2  -7   1    4.50    4.30
   1   7  -1   81.89    6.00
   1   7  -1   76.59    5.50
   1   7  -1   77.39    5.90
   1   7  -1   70.39    5.90
   1   7  -1   81.89    8.60
   1   7  -1   81.39    8.60
   1   7  -1   78.79    7.00
  -1  -7   1   95.39    8.70
  -1  -7   1   81.89    4.60
  -1  -7   1   90.59    4.60
   0   7  -1   -1.90    3.20
   0   7  -1    1.60    2.10
   0   7  -1    3.70    2.40
   0   7  -1    5.80    2.60
   0   7  -1    1.70    2.20
   0   7  -1   -0.90    5.00
  -1   7  -1   84.59    5.90
  -1   7  -1   95.29    7.70
  -1   7  -1   76.29    7.00
  -1   7  -1   93.99    5.80
  -1   7  -1   91.29    6.20
  -1   7  -1   83.19    6.00
   1  -7   1   86.19    4.70
   1  -7   1   95.89    4.70
  -2   7  -1  182.48    9.70
  -2   7  -1  181.68    9.60
  -2   7  -1  179.98   10.00
  -2   7  -1  166.58    9.40
  -2   7  -1  171.78   10.20
  -2   7  -1  170.08    9.40
   2  -7   1  175.08    8.60
   2  -7   1  175.78    8.70
  -3   7  -1   -2.80    3.00
  -3   7  -1    0.40    3.10
  -3   7  -1    2.00    3.00
  -3   7  -1    1.70    2.60
  -3   7  -1   -1.40    3.50
  -3   7  -1    1.60    3.00
   3  -7   1    1.00    2.10
   3  -7   1   -2.00    2.40
   3  -7   1   -0.70    2.20
   3  -7   1   -0.70    3.60
   3  -7   1    0.00    2.50
  -4   7  -1    0.20    3.40
  -4   7  -1    1.00    3.50
  -4   7  -1    3.60    3.80
  -4   7  -1    3.40    2.30
  -4   7  -1    4.20    3.50
  -4   7  -1    4.30    3.60
   4  -7   1    5.60    2.60
   4  -7   1   -0.40    3.00
   4  -7   1   -3.90    3.00
   4  -7   1    6.80    4.00
   4  -7   1    2.50    2.90
  -5   7  -1    0.60    4.00
  -5   7  -1    1.70    4.40
  -5   7  -1    4.80    1.70
  -5   7  -1   -0.60    4.00
  -5   7  -1    2.00    3.80
  -5   7  -1    4.60    3.90
   5  -7   1    4.20    3.00
   5  -7   1    2.90    3.50
   5  -7   1    4.30    3.30
   5  -7   1    6.30    4.50
   5  -7   1    3.60    3.50
  -6   7  -1   -1.80    4.40
  -6   7  -1    2.00    5.00
  -6   7  -1   -1.80    2.00
  -6   7  -1   -2.20    4.10
  -6   7  -1   -1.80    4.30
  -6   7  -1   -0.50    4.50
  -6   7  -1   -1.00    4.20
   6  -7   1    2.50    3.90
   6  -7   1    6.50    3.20
   6  -7   1    2.40    4.60
   6  -7   1   -2.20    3.50
   6  -7   1    2.60    3.80
  -7   7  -1   13.90    2.90
  -7   7  -1   18.60    5.30
  -7   7  -1   14.50    5.80
  -7   7  -1   27.50    6.20
  -7   7  -1   13.90    5.20
  -7   7  -1   18.50    5.40
  -7   7  -1   29.90    6.00
   7  -7   1   15.90    4.90
   7  -7   1   12.30    4.80
   7  -7   1   28.90    6.20
   7  -7   1   25.90    5.30
   7  -7   1   18.80    4.70
  -8   7  -1    4.00    5.10
  -8   7  -1   -0.30    5.70
  -8   7  -1    7.50    3.10
  -8   7  -1    1.50    5.40
  -8   7  -1    0.70    4.80
  -8   7  -1    7.80    5.40
  -8   7  -1    4.40    5.50
   8  -7   1    8.70    4.40
   8  -7   1    8.20    5.00
   8  -7   1    2.10    4.80
   8  -7   1   -3.90    4.80
   8  -7   1    9.10    4.50
  -9   7  -1    5.60    5.90
  -9   7  -1   10.20    6.90
  -9   7  -1    4.10    6.20
  -9   7  -1   10.00    6.00
  -9   7  -1    7.40    6.40
  -9   7  -1   11.40    5.60
  -9   7  -1    2.00    3.40
   9  -7   1    2.80    4.70
   9  -7   1    8.80    6.00
 -10   7  -1  115.49   11.80
 -10   7  -1   70.69   10.30
 -10   7  -1   91.59   10.70
 -10   7  -1   88.99   10.40
 -10   7  -1   89.69   10.70
 -10   7  -1   98.09    8.70
 -10   7  -1  107.29   11.30
  10  -7   1  101.99   10.40
  10  -7   1   91.09   10.30
 -11   7  -1    1.60    7.50
 -11   7  -1   10.80    7.60
 -11   7  -1   13.40    4.60
 -11   7  -1   15.10    7.30
 -11   7  -1   -4.20    7.10
  11  -7   1    3.80    6.90
  11  -7   1   18.30    6.70
 -12   7  -1   40.90    6.70
 -12   7  -1   37.30    9.10
 -12   7  -1   47.70   10.50
 -12   7  -1   34.80   10.30
  12  -7   1   51.89    8.50
  12  -7   1   35.90    8.20
 -13   7  -1   -2.70    8.20
 -13   7  -1    6.50    8.10
 -13   7  -1    0.80    8.30
  13  -7   1   11.40    8.20
 -14   7  -1    9.30    9.50
 -14   7  -1    4.90    8.90
 -14   7  -1    7.10    9.80
  14  -7   1   -7.90    8.10
 -15   7  -1    0.90   10.10
 -15   7  -1   15.80   10.40
 -15   7  -1   20.10    9.90
  15  -7   1    8.20   10.40
  12   6  -1   56.79   11.80
  12   6  -1   24.70    9.60
  12   6  -1   43.40   12.70
  12   6  -1   41.80   10.30
  11   6  -1    2.90    8.80
  11   6  -1   18.70    8.80
  11   6  -1   34.40    9.70
  11   6  -1   37.60   11.10
 -11  -6   1   24.30    7.40
  10   6  -1   -8.60    8.50
  10   6  -1    9.50    7.30
  10   6  -1    6.20    7.50
  10   6  -1   11.40    9.00
  10   6  -1    4.20    8.40
 -10  -6   1    6.30    3.60
 -10  -6   1   -7.60    4.90
   9   6  -1   18.60    8.20
   9   6  -1   26.90    7.60
   9   6  -1   12.00    7.90
   9   6  -1   14.50    8.20
   9   6  -1   23.00    7.50
   9   6  -1   30.50    7.10
  -9  -6   1   24.80    4.50
  -9  -6   1   23.10    5.90
  -9  -6   1   30.80    6.70
   8   6  -1    9.40    6.00
   8   6  -1   13.00    6.90
   8   6  -1   -2.00    5.50
   8   6  -1    6.80    7.20
   8   6  -1    2.20    7.50
   8   6  -1   -0.30    5.60
   8   6  -1   11.10    5.40
  -8  -6   1    0.80    3.20
  -8  -6   1    5.50    4.80
  -8  -6   1    3.20    4.20
  -8  -6   1    1.40    6.20
   7   6  -1    2.30    6.40
   7   6  -1   -2.60    5.10
   7   6  -1    0.20    5.70
   7   6  -1    3.40    5.20
   7   6  -1    2.10    5.00
   7   6  -1    0.70    4.90
   7   6  -1    5.40    6.30
   7   6  -1    6.00    6.50
  -7  -6   1    6.80    4.00
  -7  -6   1    7.60    6.40
  -7  -6   1    5.20    3.20
  -7  -6   1    5.60    5.30
  -7  -6   1    2.10    4.50
   6   6  -1   37.60    6.50
   6   6  -1   24.20    5.50
   6   6  -1   26.90    5.60
   6   6  -1   26.30    5.40
   6   6  -1    7.30    6.40
   6   6  -1   17.50    7.70
   6   6  -1   29.60    6.70
   6   6  -1   26.50    5.90
   6   6  -1   30.30    3.90
  -6  -6   1   33.10    6.90
  -6  -6   1   22.90    3.60
  -6  -6   1   29.00    6.50
  -6  -6   1   33.90    5.30
  -6  -6   1   32.00    5.00
  -6  -6   1   23.00    4.50
   5   6  -1   -2.70    2.30
   5   6  -1  -10.40    5.50
   5   6  -1    0.40    4.20
   5   6  -1   -3.50    4.90
   5   6  -1    1.10    3.90
   5   6  -1   -0.30    3.90
   5   6  -1    1.10    5.10
   5   6  -1   -3.60    3.70
  -5  -6   1    1.50    4.80
  -5  -6   1    2.10    3.10
  -5  -6   1   -2.30    2.60
  -5  -6   1   -4.20    3.50
  -5  -6   1    0.60    4.70
  -5  -6   1    5.60    3.10
  -5  -6   1   -0.20    3.00
   4   6  -1    2.90    3.80
   4   6  -1    1.60    5.70
   4   6  -1   12.30    5.10
   4   6  -1    6.80    2.50
   4   6  -1    6.50    3.60
   4   6  -1    2.70    5.40
   4   6  -1    4.20    3.80
   4   6  -1    4.60    3.60
  -4  -6   1    8.80    4.80
  -4  -6   1    5.00    3.20
  -4  -6   1    8.50    3.20
  -4  -6   1    3.90    2.90
  -4  -6   1    6.70    2.80
  -4  -6   1    2.10    4.90
   3   6  -1   38.20    3.90
   3   6  -1   43.20    4.60
   3   6  -1   44.00    6.40
   3   6  -1   41.20    4.70
   3   6  -1   41.10    6.90
   3   6  -1   37.70    4.60
   3   6  -1   38.80    7.20
   3   6  -1   38.40    4.70
  -3  -6   1   48.00    4.50
  -3  -6   1   38.70    3.90
  -3  -6   1   52.19    6.80
  -3  -6   1   37.40    6.70
  -3  -6   1   43.40    4.30
  -3  -6   1   37.80    4.00
   2   6  -1  216.18   13.50
   2   6  -1  211.18   13.50
   2   6  -1  212.18   10.80
   2   6  -1  204.98   10.90
   2   6  -1  210.88   11.00
   2   6  -1  215.28   11.10
   2   6  -1  200.58   10.70
  -2  -6   1  220.38   10.20
  -2  -6   1  181.08    9.90
  -2  -6   1  220.98    9.50
  -2  -6   1  220.68    9.60
  -2  -6   1  204.98   13.10
   1   6  -1  117.19    7.00
   1   6  -1  120.19    6.90
   1   6  -1  115.49    7.10
   1   6  -1  133.69    8.20
   1   6  -1  125.59    9.60
   1   6  -1  130.49    7.20
   1   6  -1  112.59   10.00
  -1  -6   1  110.59    9.60
  -1  -6   1  118.89    6.10
  -1  -6   1  130.59    6.20
   0   6  -1  393.26   17.40
   0   6  -1  378.56   19.10
   0   6  -1  398.06   17.30
   0   6  -1  399.96   20.60
   0   6  -1  397.16   17.40
   0   6  -1  373.46   17.20
   0  -6   1  403.86   16.60
   0  -6   1  386.66   16.60
  -1   6  -1   -2.40    2.10
  -1   6  -1   -1.10    2.00
  -1   6  -1    1.60    2.40
  -1   6  -1   -0.50    2.10
  -1   6  -1    1.70    3.00
  -1   6  -1   -1.80    2.90
   1  -6   1    0.00    1.50
   1  -6   1    0.90    1.50
  -2   6  -1  370.76   17.30
  -2   6  -1  356.66   17.60
  -2   6  -1  371.26   16.90
  -2   6  -1  376.56   17.00
  -2   6  -1  372.16   17.00
  -2   6  -1  364.96   16.80
   2  -6   1  369.36   16.00
   2  -6   1  369.46   16.00
   2  -6   1  376.66   16.40
  -3   6  -1   37.90    3.60
  -3   6  -1   28.20    3.90
  -3   6  -1   31.50    4.10
  -3   6  -1   28.10    4.20
  -3   6  -1   25.70    3.90
  -3   6  -1   27.00    4.50
   3  -6   1   33.00    5.00
   3  -6   1   30.50    3.80
   3  -6   1   34.00    3.90
   3  -6   1   34.40    3.40
   3  -6   1   31.90    3.50
  -4   6  -1   -1.50    3.70
  -4   6  -1    8.20    3.90
  -4   6  -1    4.70    3.60
  -4   6  -1   -2.00    3.60
  -4   6  -1   -3.20    3.40
   4  -6   1    3.00    3.10
   4  -6   1    2.60    3.10
   4  -6   1    2.50    2.90
   4  -6   1   -0.80    3.00
   4  -6   1   -3.10    4.00
  -5   6  -1  119.59    9.10
  -5   6  -1  104.79    8.50
  -5   6  -1  106.49    9.10
  -5   6  -1  104.29    8.90
  -5   6  -1  106.19    9.10
  -5   6  -1  120.69    6.30
  -5   6  -1  106.99    9.10
   5  -6   1   90.39    7.80
   5  -6   1  122.49    9.40
   5  -6   1  106.89    8.30
   5  -6   1  121.19    8.30
   5  -6   1  113.09    8.80
  -6   6  -1  236.98   13.30
  -6   6  -1  204.18   13.10
  -6   6  -1  212.88   11.00
  -6   6  -1  200.58   14.10
  -6   6  -1  213.98   13.30
  -6   6  -1  224.08   13.60
  -6   6  -1  231.58   13.40
   6  -6   1  233.98   13.90
   6  -6   1  220.58   12.90
   6  -6   1  234.88   12.80
   6  -6   1  220.28   12.80
   6  -6   1  224.58   12.50
  -7   6  -1  136.79   11.60
  -7   6  -1  129.79   10.80
  -7   6  -1  111.49   10.60
  -7   6  -1  137.59    8.30
  -7   6  -1  127.69   11.00
  -7   6  -1  146.79   10.90
  -7   6  -1  135.79   10.40
   7  -6   1  161.18   11.90
   7  -6   1  109.79   10.10
   7  -6   1  149.09   10.40
   7  -6   1  126.69    9.80
  -8   6  -1   43.30    4.90
  -8   6  -1   40.90    6.60
  -8   6  -1   35.40    7.20
  -8   6  -1   39.70    6.50
  -8   6  -1   37.40    6.90
  -8   6  -1   28.60    5.90
  -8   6  -1   38.90    6.60
   8  -6   1   34.60    7.00
   8  -6   1   31.40    6.20
   8  -6   1   59.59    7.00
   8  -6   1   26.70    5.50
   8  -6   1   26.80    5.70
  -9   6  -1    2.70    5.80
  -9   6  -1    6.40    5.60
  -9   6  -1    3.50    6.40
  -9   6  -1    5.70    3.70
  -9   6  -1    6.40    6.00
  -9   6  -1   -4.50    4.80
  -9   6  -1   -1.60    5.20
   9  -6   1    3.00    5.50
   9  -6   1    4.10    5.70
   9  -6   1   -4.80    4.30
 -10   6  -1  169.58   11.60
 -10   6  -1  162.98   15.70
 -10   6  -1  159.08   14.10
 -10   6  -1  185.48   13.30
 -10   6  -1  174.38   13.20
 -10   6  -1  176.18   14.80
 -10   6  -1  156.08   13.50
  10  -6   1  180.18   14.10
  10  -6   1  168.38   14.40
 -11   6  -1   13.60    7.50
 -11   6  -1    7.40    5.00
 -11   6  -1   13.10    7.50
 -11   6  -1   13.30    6.70
 -11   6  -1    3.10    7.10
  11  -6   1    5.30    6.80
  11  -6   1   12.70    7.20
  11  -6   1    0.90    5.80
  11  -6   1   15.70    5.20
 -12   6  -1   40.10    9.30
 -12   6  -1   34.90    9.20
 -12   6  -1   31.80    6.50
 -12   6  -1   22.80    7.90
  12  -6   1   47.80    8.80
  12  -6   1   21.50    7.90
  12  -6   1   32.00    6.70
  12  -6   1   28.20    9.00
 -13   6  -1    7.70    8.40
 -13   6  -1    6.40    8.80
 -13   6  -1    4.60    5.60
 -13   6  -1   -4.00    8.80
  13  -6   1   -9.20    6.80
  13  -6   1    6.80    5.90
  13  -6   1   13.30    7.60
  13  -6   1    3.20    8.10
 -14   6  -1   -1.90    8.60
 -14   6  -1    5.80    8.70
 -14   6  -1  -18.10    7.30
  14  -6   1   -4.30    8.40
  14  -6   1   -3.60    7.50
  14  -6   1   -0.50    6.00
 -15   6  -1   16.90   10.00
 -15   6  -1    2.40   10.10
 -15   6  -1    3.20    9.80
  15  -6   1    4.30    8.60
  15  -6   1   -4.50    8.40
  12   5  -1   89.39   13.20
  12   5  -1   91.09   13.30
  12   5  -1   98.69   13.30
  12   5  -1   73.29   13.30
 -12  -5   1   86.39   10.70
  11   5  -1    0.00    7.90
  11   5  -1   -4.50    8.40
  11   5  -1    2.50    7.90
  11   5  -1    0.80    8.30
  11   5  -1    3.30    7.00
 -11  -5   1    1.80    4.00
 -11  -5   1    7.70    6.30
  10   5  -1    4.50    6.90
  10   5  -1    0.30    8.30
  10   5  -1   -1.70    7.50
  10   5  -1    1.60    7.30
  10   5  -1   -7.60    6.40
  10   5  -1    0.00    6.80
 -10  -5   1    7.00    4.10
 -10  -5   1    0.80    5.70
 -10  -5   1   -4.00    4.70
   9   5  -1   21.40    7.00
   9   5  -1    5.70    8.00
   9   5  -1   10.10    7.00
   9   5  -1   -3.60    5.70
   9   5  -1    3.20    6.20
   9   5  -1    7.50    7.80
   9   5  -1   12.00    6.50
  -9  -5   1    0.50    3.70
  -9  -5   1    4.00    5.20
  -9  -5   1    8.00    5.00
  -9  -5   1    7.70    8.10
   8   5  -1    4.50    6.30
   8   5  -1    9.30    7.40
   8   5  -1   14.00    6.10
   8   5  -1    2.30    6.30
   8   5  -1    4.50    5.50
   8   5  -1   16.00    5.60
   8   5  -1    9.70    6.00
   8   5  -1    3.20    5.70
  -8  -5   1    7.40    3.60
  -8  -5   1   13.90    6.70
  -8  -5   1    5.10    4.90
  -8  -5   1    8.40    5.70
  -8  -5   1   12.70    4.50
   7   5  -1    2.00    5.60
   7   5  -1   -0.80    5.00
   7   5  -1    0.00    5.30
   7   5  -1   -2.40    5.40
   7   5  -1    0.60    5.80
   7   5  -1    2.20    4.80
   7   5  -1    1.60    5.10
   7   5  -1   -6.10    4.40
  -7  -5   1    0.90    4.20
  -7  -5   1   -0.80    4.20
  -7  -5   1    6.90    4.20
  -7  -5   1    3.20    5.50
  -7  -5   1   -4.00    5.70
  -7  -5   1    3.10    3.00
   6   5  -1    8.70    4.90
   6   5  -1    7.40    5.50
   6   5  -1   11.20    4.80
   6   5  -1   10.10    6.40
   6   5  -1    6.40    4.60
   6   5  -1    6.90    3.00
   6   5  -1    8.60    5.10
   6   5  -1    9.30    5.40
   6   5  -1    3.00    4.50
  -6  -5   1    9.60    5.10
  -6  -5   1    7.50    4.10
  -6  -5   1   10.60    4.10
  -6  -5   1   15.10    4.30
  -6  -5   1    5.30    5.60
  -6  -5   1    7.30    3.60
  -6  -5   1    7.40    3.10
   5   5  -1   45.70    6.30
   5   5  -1   44.60    5.90
   5   5  -1   49.10    7.50
   5   5  -1   52.19    6.00
   5   5  -1   50.49    6.20
   5   5  -1   39.60    4.20
   5   5  -1   44.70    6.70
   5   5  -1   44.90    5.80
   5   5  -1   48.80    8.10
  -5  -5   1   50.99    5.40
  -5  -5   1   44.80    5.40
  -5  -5   1   53.49    7.70
  -5  -5   1   37.10    4.60
  -5  -5   1   42.00    4.20
  -5  -5   1   46.60    4.90
  -5  -5   1   38.60    6.10
   4   5  -1    8.80    3.70
   4   5  -1   11.70    4.40
   4   5  -1    3.10    5.20
   4   5  -1    9.60    4.00
   4   5  -1   13.80    4.90
   4   5  -1    7.00    4.00
   4   5  -1    7.10    2.50
   4   5  -1    7.80    5.10
  -4  -5   1   12.10    3.40
  -4  -5   1    4.90    3.30
  -4  -5   1    6.40    5.10
  -4  -5   1    9.70    2.80
  -4  -5   1    8.90    3.00
  -4  -5   1    8.00    3.30
  -4  -5   1   11.30    4.70
   3   5  -1  596.04   27.90
   3   5  -1  634.24   27.40
   3   5  -1  627.84   30.10
   3   5  -1  589.34   27.80
   3   5  -1  618.74   29.20
   3   5  -1  620.64   27.70
   3   5  -1  655.33   27.90
   3   5  -1  670.13   30.40
  -3  -5   1  629.94   27.20
  -3  -5   1  540.35   29.20
  -3  -5   1  620.54   27.40
  -3  -5   1  621.34   29.20
  -3  -5   1  647.44   27.40
  -3  -5   1  653.53   27.20
   2   5  -1    3.30    2.60
   2   5  -1   10.00    4.70
   2   5  -1    4.80    2.90
   2   5  -1    0.90    4.20
   2   5  -1    3.70    2.40
  -2  -5   1    1.00    1.00
  -2  -5   1   -2.20    4.30
  -2  -5   1    3.90    4.70
  -2  -5   1   -0.60    1.90
  -2  -5   1    2.10    2.30
  -2  -5   1    0.90    2.00
   1   5  -1    7.10    2.30
   1   5  -1    1.50    2.10
   1   5  -1    5.00    4.00
   1   5  -1    6.90    2.40
   1   5  -1    4.00    2.30
   1   5  -1    9.50    4.30
   1   5  -1    8.20    3.20
  -1  -5   1   -2.80    3.60
  -1  -5   1    4.80    1.90
  -1  -5   1    4.00    1.80
   0   5  -1    0.60    2.00
   0   5  -1   -1.30    3.00
   0   5  -1   -2.60    1.80
   0   5  -1   -3.10    4.60
   0   5  -1   -0.90    1.80
   0   5  -1   -0.20    1.80
  -1   5  -1  188.08   10.10
  -1   5  -1  186.58    9.00
  -1   5  -1  187.18   10.20
  -1   5  -1  190.28    9.10
  -1   5  -1  187.68    9.10
  -1   5  -1  185.28    9.00
   1  -5   1  192.98    8.60
   1  -5   1  189.38    8.60
  -2   5  -1   10.30    2.80
  -2   5  -1   17.00    3.10
  -2   5  -1   14.90    2.90
  -2   5  -1   10.40    2.80
  -2   5  -1   16.10    2.90
  -2   5  -1   24.40    3.80
   2  -5   1   12.70    2.30
   2  -5   1   11.10    4.00
   2  -5   1   16.90    2.70
   2  -5   1   15.70    2.20
  -3   5  -1    2.30    3.50
  -3   5  -1   -3.80    3.00
  -3   5  -1    0.50    3.20
  -3   5  -1   -1.80    2.90
  -3   5  -1   -2.80    3.10
   3  -5   1   -0.50    3.90
   3  -5   1    3.20    2.90
   3  -5   1   -0.80    2.90
   3  -5   1   -2.80    2.50
   3  -5   1   -4.10    2.80
  -4   5  -1   19.10    4.00
  -4   5  -1   25.90    4.40
  -4   5  -1   32.90    4.50
  -4   5  -1   27.10    5.10
  -4   5  -1   29.20    2.80
  -4   5  -1   22.60    4.50
   4  -5   1   24.40    3.90
   4  -5   1   25.80    4.10
   4  -5   1   27.00    4.20
   4  -5   1   25.60    4.30
   4  -5   1   42.20    5.50
  -5   5  -1  273.87   14.60
  -5   5  -1  249.28   14.40
  -5   5  -1  258.57   15.20
  -5   5  -1  266.87   14.50
  -5   5  -1  258.27   12.60
  -5   5  -1  278.07   14.40
  -5   5  -1  260.27   14.50
   5  -5   1  286.37   15.10
   5  -5   1  267.57   14.10
   5  -5   1  282.87   14.30
   5  -5   1  258.27   13.90
   5  -5   1  249.18   13.80
  -6   5  -1  219.08   12.90
  -6   5  -1  190.18   12.60
  -6   5  -1  180.88   12.90
  -6   5  -1  209.58   12.50
  -6   5  -1  202.38   10.80
  -6   5  -1  186.08   12.70
  -6   5  -1  210.48   12.60
   6  -5   1  189.98   12.40
   6  -5   1  220.08   12.40
   6  -5   1  246.88   13.60
   6  -5   1  205.78   12.10
  -7   5  -1   24.50    6.30
  -7   5  -1   36.70    6.40
  -7   5  -1   34.40    4.30
  -7   5  -1   50.09    6.50
  -7   5  -1   38.50    5.90
  -7   5  -1   36.50    6.10
  -7   5  -1   44.90    6.40
   7  -5   1   40.70    5.80
   7  -5   1   43.50    6.70
   7  -5   1   34.10    6.20
   7  -5   1   30.90    5.20
   7  -5   1   40.70    6.80
  -8   5  -1   61.39    8.20
  -8   5  -1   69.09    7.80
  -8   5  -1   80.09    8.70
  -8   5  -1   71.09    7.80
  -8   5  -1   76.39    9.30
  -8   5  -1   62.89    7.60
  -8   5  -1   70.29    7.60
   8  -5   1   69.09    7.60
   8  -5   1   80.19    8.30
   8  -5   1   77.39    8.90
   8  -5   1   66.59    8.10
   8  -5   1   77.69    7.60
   8  -5   1   68.29    8.20
   8  -5   1   75.79    8.30
  -9   5  -1   11.20    5.70
  -9   5  -1   11.80    5.60
  -9   5  -1    1.70    6.20
  -9   5  -1   -4.80    5.30
  -9   5  -1    1.10    3.80
  -9   5  -1    0.20    5.00
  -9   5  -1   -2.00    5.90
   9  -5   1   -1.10    4.60
   9  -5   1    3.80    4.80
   9  -5   1  -14.70    6.10
   9  -5   1    1.30    5.60
   9  -5   1    3.00    5.10
   9  -5   1    0.70    3.90
 -10   5  -1   -7.60    5.00
 -10   5  -1    0.70    4.50
 -10   5  -1    8.80    6.60
 -10   5  -1   -2.10    6.10
 -10   5  -1   -3.60    5.10
 -10   5  -1    7.80    6.60
 -10   5  -1   -1.00    6.00
  10  -5   1   -0.40    5.70
  10  -5   1   -0.80    6.30
  10  -5   1    3.70    5.90
  10  -5   1    0.40    5.40
  10  -5   1   -2.60    4.30
 -11   5  -1   39.90    9.20
 -11   5  -1   57.79    9.60
 -11   5  -1   44.30    8.70
 -11   5  -1   41.40    8.90
 -11   5  -1   36.60    6.70
  11  -5   1   40.60    8.30
  11  -5   1   34.00    8.70
  11  -5   1   33.70    8.00
  11  -5   1   44.20    7.40
 -12   5  -1   61.29    8.30
 -12   5  -1   51.99    9.80
 -12   5  -1   55.29    9.90
 -12   5  -1   58.39   11.70
 -12   5  -1   75.39   11.00
 -12   5  -1   41.10    9.00
  12  -5   1   57.29    9.00
  12  -5   1   51.69    9.60
  12  -5   1   59.29    8.70
  12  -5   1   46.80    9.20
 -13   5  -1   50.29    8.30
 -13   5  -1   37.20   10.20
 -13   5  -1   29.70    9.60
 -13   5  -1   26.00   10.20
  13  -5   1   44.40    9.10
  13  -5   1   45.90    8.30
  13  -5   1   24.70    8.50
  13  -5   1   29.90    9.70
 -14   5  -1   34.10   10.30
 -14   5  -1   14.00    9.80
 -14   5  -1   10.80   10.20
  14  -5   1   16.80   10.00
  14  -5   1   20.40    8.60
  14  -5   1   27.00    8.30
 -15   5  -1    6.70   10.20
 -15   5  -1   -7.40    7.50
  15  -5   1   14.00    7.80
  15  -5   1  -11.00    9.30
  15  -5   1   -3.70    8.50
  13   4  -1   -2.60    9.40
  13   4  -1    3.30    9.30
  13   4  -1   17.00    9.30
 -13  -4   1   -4.00    7.70
  12   4  -1   -7.00    7.50
  12   4  -1   -6.70    9.30
  12   4  -1   11.40    8.30
  12   4  -1   14.70    9.70
  12   4  -1   12.10    8.60
 -12  -4   1    6.80    6.10
 -12  -4   1    4.50    7.70
  11   4  -1   -5.60    8.40
  11   4  -1   -3.80    6.80
  11   4  -1    5.50    7.50
  11   4  -1   -0.70    6.80
  11   4  -1    1.90    8.30
 -11  -4   1    1.50    6.30
 -11  -4   1    3.00    4.30
  10   4  -1   12.60    6.50
  10   4  -1   -1.60    7.20
  10   4  -1   19.00    7.30
  10   4  -1    2.30    7.40
  10   4  -1   -4.10    6.30
  10   4  -1    3.10    7.40
 -10  -4   1    6.00    4.20
 -10  -4   1    8.90    6.20
 -10  -4   1   13.20    5.80
   9   4  -1    1.40    6.40
   9   4  -1   -0.40    6.10
   9   4  -1    2.10    5.80
   9   4  -1    7.00    7.30
   9   4  -1   -3.20    6.70
   9   4  -1    6.20    6.20
   9   4  -1    3.60    5.80
  -9  -4   1    7.20    4.00
  -9  -4   1   -0.70    4.60
  -9  -4   1    0.00    5.60
  -9  -4   1   -1.50    6.10
  -9  -4   1   -1.20    5.20
   8   4  -1   35.50    7.90
   8   4  -1   27.00    7.60
   8   4  -1   24.80    6.30
   8   4  -1   14.60    6.00
   8   4  -1   35.10    7.40
   8   4  -1   32.10    6.70
   8   4  -1   45.40    7.00
   8   4  -1   33.40    7.50
  -8  -4   1   30.40    7.20
  -8  -4   1   42.90    6.80
  -8  -4   1   35.50    5.80
  -8  -4   1   29.30    6.70
  -8  -4   1   25.40    4.60
   7   4  -1   33.00    6.70
   7   4  -1   36.00    6.60
   7   4  -1   39.80    8.10
   7   4  -1   24.20    5.70
   7   4  -1   28.50    6.30
   7   4  -1   28.20    6.50
   7   4  -1   23.10    6.00
   7   4  -1   23.80    6.70
  -7  -4   1   27.30    5.10
  -7  -4   1   26.00    7.30
  -7  -4   1   19.90    5.00
  -7  -4   1   38.30    6.70
  -7  -4   1   26.40    5.00
  -7  -4   1   31.90    4.40
  -7  -4   1   31.70    5.80
   6   4  -1    2.10    4.60
   6   4  -1    4.20    5.90
   6   4  -1    5.40    3.10
   6   4  -1   -2.30    4.20
   6   4  -1    3.80    5.50
   6   4  -1    3.10    4.90
   6   4  -1   -3.20    4.20
   6   4  -1    5.40    4.30
   6   4  -1   -2.70    4.40
  -6  -4   1    4.30    2.90
  -6  -4   1   -0.90    5.10
  -6  -4   1   -1.10    3.80
  -6  -4   1    3.00    4.20
  -6  -4   1    4.30    4.40
  -6  -4   1    2.90    3.90
   5   4  -1    0.50    4.90
   5   4  -1   -1.40    3.50
   5   4  -1   -5.20    5.50
   5   4  -1   -1.90    4.30
   5   4  -1    0.30    2.60
   5   4  -1    3.50    4.00
   5   4  -1   -0.10    4.10
   5   4  -1    7.80    4.70
   5   4  -1   -1.50    3.90
  -5  -4   1   -2.50    3.70
  -5  -4   1    1.20    4.10
  -5  -4   1   -2.20    4.80
  -5  -4   1   -3.00    3.30
  -5  -4   1   -1.30    3.50
  -5  -4   1    0.10    2.70
  -5  -4   1   -2.30    3.20
   4   4  -1   16.40    6.30
   4   4  -1   22.00    4.30
   4   4  -1   25.40    4.30
   4   4  -1   17.60    5.00
   4   4  -1   22.60    6.10
   4   4  -1   17.50    3.10
   4   4  -1   18.70    4.40
   4   4  -1   10.50    4.00
  -4  -4   1   24.40    5.70
  -4  -4   1   21.00    3.50
  -4  -4   1   22.00    3.50
  -4  -4   1   16.60    3.70
  -4  -4   1   24.40    4.00
  -4  -4   1   22.10    5.10
  -4  -4   1   23.20    4.10
   3   4  -1   32.10    6.10
   3   4  -1   32.50    4.90
   3   4  -1   25.00    4.00
   3   4  -1   22.70    5.40
   3   4  -1   23.20    3.10
   3   4  -1   26.30    3.90
   3   4  -1   26.30    3.90
   3   4  -1   20.40    3.90
  -3  -4   1   20.70    5.30
  -3  -4   1   30.80    3.50
  -3  -4   1   28.70    3.70
  -3  -4   1   29.60    3.50
  -3  -4   1   24.90    3.40
  -3  -4   1   34.00    5.30
  -3  -4   1   26.60    3.70
   2   4  -1  323.27   14.70
   2   4  -1  315.67   14.70
   2   4  -1  300.17   14.80
   2   4  -1  316.07   15.90
   2   4  -1  300.87   14.50
   2   4  -1  297.37   16.40
   2   4  -1  296.57   16.70
   2   4  -1  327.37   14.70
  -2  -4   1  320.97   16.10
  -2  -4   1  321.47   14.30
  -2  -4   1  305.37   16.30
  -2  -4   1  331.67   14.20
  -2  -4   1  339.17   14.20
  -2  -4   1  302.27   14.30
   1   4  -1 1143.19   48.30
   1   4  -1 1130.69   48.30
   1   4  -1 1127.29   49.70
   1   4  -1 1168.18   48.90
   1   4  -1 1133.29   49.80
   1   4  -1 1114.09   48.20
   1   4  -1 1146.09   48.20
  -1  -4   1 1234.38   48.10
  -1  -4   1 1170.18   48.00
  -1  -4   1 1129.79   49.90
   0   4  -1  447.06   21.20
   0   4  -1  470.85   19.70
   0   4  -1  464.25   19.80
   0   4  -1  477.15   19.70
   0   4  -1  462.75   19.80
  -1   4  -1   -1.90    2.80
  -1   4  -1    1.30    2.00
  -1   4  -1    0.30    1.90
  -1   4  -1    1.40    1.80
  -1   4  -1    3.30    2.80
  -1   4  -1    1.80    1.90
   1  -4   1    2.70    1.60
   1  -4   1    0.20    1.60
  -2   4  -1   17.60    3.10
  -2   4  -1   17.20    3.00
  -2   4  -1   12.60    2.80
  -2   4  -1   17.20    3.00
  -2   4  -1   14.90    3.50
   2  -4   1   20.40    3.00
   2  -4   1   17.80    2.90
   2  -4   1   14.40    2.40
   2  -4   1   16.30    4.10
   2  -4   1   19.70    2.60
  -3   4  -1  130.69    8.80
  -3   4  -1  122.59    7.90
  -3   4  -1  121.49    7.90
  -3   4  -1  116.19    8.00
  -3   4  -1  116.29    8.00
   3  -4   1  116.89    7.50
   3  -4   1  115.69    7.50
   3  -4   1  123.09    7.80
   3  -4   1  121.99    8.60
   3  -4   1  118.79    7.30
  -4   4  -1   78.49    5.10
  -4   4  -1   68.99    6.90
  -4   4  -1   60.39    5.90
  -4   4  -1   66.39    6.20
  -4   4  -1   64.89    6.00
  -4   4  -1   57.29    5.60
  -4   4  -1   58.89    6.70
   4  -4   1   66.49    6.70
   4  -4   1   80.39    6.50
   4  -4   1   70.89    6.90
   4  -4   1   73.69    6.70
   4  -4   1   78.59    8.00
  -5   4  -1  116.19    8.70
  -5   4  -1  110.19    9.20
  -5   4  -1  108.99    9.10
  -5   4  -1  110.09    9.70
  -5   4  -1  113.19    7.40
  -5   4  -1  112.69    9.10
  -5   4  -1  109.29    9.30
   5  -4   1  107.99    8.90
   5  -4   1  109.59    8.40
   5  -4   1  125.39    9.90
   5  -4   1  104.19    8.30
  -6   4  -1   45.90    6.10
  -6   4  -1   43.90    5.80
  -6   4  -1   54.19    5.10
  -6   4  -1   33.10    5.60
  -6   4  -1   47.40    6.60
  -6   4  -1   44.30    5.70
  -6   4  -1   40.90    5.70
   6  -4   1   49.80    6.30
   6  -4   1   53.89    5.80
   6  -4   1   44.60    6.10
   6  -4   1   65.89    7.40
   6  -4   1   47.90    6.10
   6  -4   1   52.69    5.20
   6  -4   1   50.99    6.10
  -7   4  -1   75.49    7.90
  -7   4  -1   73.59    7.20
  -7   4  -1   69.19    7.90
  -7   4  -1   49.99    6.80
  -7   4  -1   71.39    6.50
  -7   4  -1   68.69    7.70
  -7   4  -1   71.79    8.70
   7  -4   1   76.99    8.30
   7  -4   1   62.59    6.90
   7  -4   1   62.39    7.00
   7  -4   1   76.49    7.30
   7  -4   1   53.49    6.90
   7  -4   1   63.89    6.80
   7  -4   1   66.89    7.20
  -8   4  -1   20.50    5.90
  -8   4  -1   13.50    4.30
  -8   4  -1   12.20    4.90
  -8   4  -1   11.00    5.20
  -8   4  -1   19.20    6.00
  -8   4  -1   13.40    6.30
  -8   4  -1   14.50    5.00
   8  -4   1   27.00    5.80
   8  -4   1    6.20    5.20
   8  -4   1   22.30    5.80
   8  -4   1   18.60    5.70
   8  -4   1    5.60    5.00
   8  -4   1   19.30    4.80
   8  -4   1   20.00    6.50
  -9   4  -1   -1.60    5.80
  -9   4  -1    2.90    4.90
  -9   4  -1  -11.80    4.80
  -9   4  -1    3.60    5.60
  -9   4  -1   -2.00    4.70
  -9   4  -1    2.70    5.80
  -9   4  -1   -5.90    4.80
  -9   4  -1    4.10    3.90
   9  -4   1   -0.80    5.50
   9  -4   1   14.40    5.60
   9  -4   1  -10.30    4.30
   9  -4   1   -1.30    4.80
   9  -4   1    4.20    4.30
   9  -4   1   -0.60    5.40
   9  -4   1    3.40    5.20
 -10   4  -1   23.20    8.20
 -10   4  -1   14.80    6.30
 -10   4  -1   20.80    5.80
 -10   4  -1   26.10    7.20
 -10   4  -1   16.60    6.50
 -10   4  -1   16.20    7.10
 -10   4  -1   30.80    7.60
  10  -4   1   21.30    6.40
  10  -4   1   25.10    7.10
  10  -4   1   23.90    6.10
  10  -4   1   24.10    6.80
  10  -4   1   22.30    6.60
 -11   4  -1   42.50   13.20
 -11   4  -1   23.80    7.70
 -11   4  -1   27.80    8.30
 -11   4  -1   24.60    7.60
 -11   4  -1   30.40    6.90
 -11   4  -1   32.80    9.00
 -11   4  -1   30.10    8.10
  11  -4   1   24.10    7.70
  11  -4   1   37.70    8.50
  11  -4   1   40.80    7.40
  11  -4   1   30.80    7.90
  11  -4   1   33.90    7.30
 -12   4  -1  136.49   14.90
 -12   4  -1  147.69   14.90
 -12   4  -1  134.59   14.50
 -12   4  -1  145.99   14.00
 -12   4  -1  167.68   14.80
 -12   4  -1  146.39   13.30
  12  -4   1  130.59   13.40
  12  -4   1  165.08   13.50
  12  -4   1  143.09   14.50
  12  -4   1  132.39   13.90
 -13   4  -1   88.79   13.10
 -13   4  -1   83.89   10.50
 -13   4  -1  118.19   14.00
 -13   4  -1   80.09   11.20
  13  -4   1   87.29   12.00
  13  -4   1  112.89   11.70
  13  -4   1   82.39   11.50
  13  -4   1   70.39   11.10
 -14   4  -1   33.50   10.50
 -14   4  -1   16.20    7.60
 -14   4  -1   28.60   10.10
  14  -4   1   21.10    8.60
  14  -4   1   27.10    9.10
  14  -4   1   24.90   10.20
  14  -4   1   12.20    7.80
 -15   4  -1   27.80   11.00
  15  -4   1   11.50    8.10
  15  -4   1   21.30   10.10
  15  -4   1   34.40   10.20
  13   3  -1    5.30    9.00
  13   3  -1    1.00    9.70
  13   3  -1   -0.90    8.50
 -13  -3   1    7.60    8.00
  12   3  -1   36.00    9.80
  12   3  -1   60.19   11.30
  12   3  -1   40.20   10.80
  12   3  -1   44.20    9.90
 -12  -3   1   40.40    9.50
 -12  -3   1   47.10    7.40
  11   3  -1    8.50    7.40
  11   3  -1    3.40    7.30
  11   3  -1   -2.60    7.50
  11   3  -1   -2.50    7.90
  11   3  -1   -4.70    7.60
 -11  -3   1   -7.80    4.20
 -11  -3   1    1.30    6.50
 -11  -3   1   11.90    5.70
  10   3  -1   20.60    6.40
  10   3  -1   23.00    7.10
  10   3  -1   14.70    7.80
  10   3  -1    6.10    6.90
  10   3  -1   22.40    7.50
  10   3  -1   18.60    7.70
  10   3  -1   27.30    7.70
 -10  -3   1   20.20    6.70
 -10  -3   1   16.40    4.90
 -10  -3   1   10.40    5.00
 -10  -3   1    7.20    6.60
   9   3  -1    0.90    6.20
   9   3  -1   -5.60    5.40
   9   3  -1    0.60    6.30
   9   3  -1   -1.80    6.00
   9   3  -1    2.20    4.90
   9   3  -1   -1.50    5.70
   9   3  -1   -1.40    6.50
  -9  -3   1   -0.70    2.20
  -9  -3   1    1.60    5.90
  -9  -3   1    2.00    5.30
  -9  -3   1   -1.30    3.60
  -9  -3   1   -2.80    5.70
   8   3  -1    5.30    5.20
   8   3  -1   -2.40    5.10
   8   3  -1   10.10    5.20
   8   3  -1   10.80    5.30
   8   3  -1    6.10    6.10
   8   3  -1    5.90    5.50
   8   3  -1   -4.60    5.60
   8   3  -1   11.60    5.20
  -8  -3   1   -5.50    4.40
  -8  -3   1    6.40    3.70
  -8  -3   1   -6.90    4.80
  -8  -3   1   12.90    6.30
  -8  -3   1   -0.90    4.20
  -8  -3   1    7.80    6.60
  -8  -3   1    0.30    4.90
   7   3  -1   -1.00    5.80
   7   3  -1    1.80    4.80
   7   3  -1   -3.00    5.00
   7   3  -1   -0.90    4.60
   7   3  -1   -2.70    4.30
   7   3  -1   -1.00    4.60
   7   3  -1    3.60    4.90
   7   3  -1   -5.50    5.80
  -7  -3   1    4.60    3.40
  -7  -3   1   -0.90    4.60
  -7  -3   1    1.70    4.30
  -7  -3   1    0.40    3.10
  -7  -3   1   -0.30    3.90
  -7  -3   1    1.90    4.30
  -7  -3   1   -4.20    4.20
  -7  -3   1   -4.60    5.30
   6   3  -1    9.80    4.90
   6   3  -1    5.30    4.30
   6   3  -1   -3.20    4.40
   6   3  -1    1.90    4.40
   6   3  -1    2.10    4.40
   6   3  -1    1.10    4.40
   6   3  -1    0.60    5.50
   6   3  -1    0.50    4.90
  -6  -3   1    4.50    3.90
  -6  -3   1    4.30    5.20
  -6  -3   1    2.80    4.10
  -6  -3   1    3.00    4.80
  -6  -3   1   -0.50    3.90
  -6  -3   1    0.10    3.20
  -6  -3   1   -2.80    4.30
  -6  -3   1    3.40    3.90
   5   3  -1    0.50    4.90
   5   3  -1    0.00    3.80
   5   3  -1    7.00    4.30
   5   3  -1    4.00    4.80
   5   3  -1    1.30    2.80
   5   3  -1   -2.00    4.10
   5   3  -1   -0.50    4.00
   5   3  -1    2.40    3.80
   5   3  -1   -3.70    3.70
  -5  -3   1   -1.50    3.90
  -5  -3   1    6.10    3.40
  -5  -3   1    2.90    2.90
  -5  -3   1   -2.60    3.90
  -5  -3   1   -3.10    4.70
  -5  -3   1   -3.70    4.70
  -5  -3   1    3.90    3.60
  -5  -3   1   -1.70    3.40
   4   3  -1   28.50    5.90
   4   3  -1   22.60    4.30
   4   3  -1   26.40    6.20
   4   3  -1   20.80    4.70
   4   3  -1   20.10    3.30
   4   3  -1   36.00    5.10
   4   3  -1   19.30    4.30
   4   3  -1   22.10    4.50
  -4  -3   1   29.80    4.20
  -4  -3   1   19.00    4.60
  -4  -3   1   26.70    3.60
  -4  -3   1   23.90    4.00
  -4  -3   1   23.20    5.70
  -4  -3   1   28.20    5.80
  -4  -3   1   23.50    4.00
  -4  -3   1   23.40    4.30
   3   3  -1    2.70    4.80
   3   3  -1   -1.20    4.70
   3   3  -1   -2.40    2.30
   3   3  -1   -6.50    2.80
   3   3  -1   -1.70    3.30
   3   3  -1   -3.40    3.10
   3   3  -1   -0.90    3.00
   3   3  -1    0.00    3.20
  -3  -3   1   -7.20    2.70
  -3  -3   1    0.40    2.60
  -3  -3   1    2.30    3.00
  -3  -3   1    0.60    3.80
  -3  -3   1   -0.90    2.70
  -3  -3   1    3.30    4.10
   2   3  -1  935.01   40.80
   2   3  -1  946.71   40.90
   2   3  -1  914.71   39.30
   2   3  -1  923.31   39.30
   2   3  -1  924.81   39.40
   2   3  -1  890.21   39.40
   2   3  -1  901.31   39.40
   2   3  -1  894.91   40.10
  -2  -3   1  968.70   39.30
  -2  -3   1  865.21   39.30
  -2  -3   1  973.60   39.20
  -2  -3   1  980.20   39.30
  -2  -3   1  933.71   40.70
  -2  -3   1  945.91   40.10
  -2  -3   1  881.71   39.10
   1   3  -1  254.87   13.40
   1   3  -1  263.67   11.60
   1   3  -1  256.47   12.90
   1   3  -1  249.08   11.50
   1   3  -1  246.78   12.10
   1   3  -1  248.38   11.50
   1   3  -1  262.57   11.50
  -1  -3   1  259.27   13.10
  -1  -3   1  246.68   11.30
  -1  -3   1  266.77   11.10
  -1  -3   1  258.17   13.60
  -1  -3   1  276.77   11.40
  -1  -3   1  265.87   11.10
   0   3  -1   78.69    3.70
   0   3  -1   74.39    6.10
   0   3  -1   75.19    3.80
  -1   3  -1  834.52   34.90
  -1   3  -1  811.42   34.90
  -1   3  -1  806.82   34.80
  -1   3  -1  811.22   34.80
  -1   3  -1  821.22   35.60
   1  -3   1  817.52   34.70
   1  -3   1  848.42   35.70
   1  -3   1  839.42   34.60
   1  -3   1  849.22   34.60
   1  -3   1  875.51   34.80
  -2   3  -1  548.95   25.40
  -2   3  -1  550.44   24.80
  -2   3  -1  570.34   24.90
  -2   3  -1  585.04   25.00
  -2   3  -1  564.44   24.90
   2  -3   1  543.65   24.60
   2  -3   1  590.74   24.80
   2  -3   1  589.24   24.80
   2  -3   1  600.24   24.80
   2  -3   1  597.64   25.50
  -3   3  -1   40.70    4.20
  -3   3  -1   25.70    4.00
  -3   3  -1   29.80    3.80
  -3   3  -1   34.50    4.10
  -3   3  -1   33.80    4.30
  -3   3  -1   39.60    4.40
  -3   3  -1   37.50    4.90
   3  -3   1   40.10    4.20
   3  -3   1   33.00    4.10
   3  -3   1   41.30    4.90
   3  -3   1   24.50    3.50
   3  -3   1   32.30    3.90
  -4   3  -1  156.18    9.90
  -4   3  -1  161.78   10.40
  -4   3  -1  166.18    9.80
  -4   3  -1  161.58    9.00
  -4   3  -1  149.39   10.10
  -4   3  -1  168.58    9.90
  -4   3  -1  178.68   11.10
   4  -3   1  137.19    9.60
   4  -3   1  183.28   10.40
   4  -3   1  159.18    9.30
   4  -3   1  165.18   10.30
   4  -3   1  174.28    9.60
   4  -3   1  187.58   10.10
   4  -3   1  160.98    9.20
  -5   3  -1   -3.70    4.30
  -5   3  -1    0.40    3.70
  -5   3  -1    1.20    3.50
  -5   3  -1    0.30    3.10
  -5   3  -1   -4.20    4.50
  -5   3  -1    0.80    4.50
  -5   3  -1   -5.20    3.80
   5  -3   1    1.00    4.30
   5  -3   1   -0.30    3.70
   5  -3   1   -1.00    4.00
   5  -3   1   -0.40    4.30
   5  -3   1   -1.00    3.20
   5  -3   1   -0.60    3.20
   5  -3   1    3.40    4.00
  -6   3  -1  133.59   10.30
  -6   3  -1  131.79   11.20
  -6   3  -1  129.99    9.70
  -6   3  -1  135.19    9.60
  -6   3  -1  131.69    9.30
  -6   3  -1  114.09    9.80
   6  -3   1  137.79   10.20
   6  -3   1  132.29   10.80
   6  -3   1  128.39    9.30
   6  -3   1  124.69    9.50
   6  -3   1  133.09   10.30
   6  -3   1  141.89   10.00
   6  -3   1  132.09   10.40
  -7   3  -1   28.60    6.40
  -7   3  -1   42.60    6.30
  -7   3  -1   42.10    7.20
  -7   3  -1   33.40    5.40
  -7   3  -1   33.90    6.80
  -7   3  -1   37.90    6.00
  -7   3  -1   37.10    5.20
  -7   3  -1   40.50    6.30
   7  -3   1   32.20    6.50
   7  -3   1   27.40    5.60
   7  -3   1   29.80    5.70
   7  -3   1   26.50    5.20
   7  -3   1   28.80    6.00
   7  -3   1   33.20    5.70
   7  -3   1   35.80    5.20
  -8   3  -1    6.60    5.50
  -8   3  -1    0.40    4.90
  -8   3  -1   -2.00    4.10
  -8   3  -1    3.80    5.00
  -8   3  -1   -5.20    4.80
  -8   3  -1    0.00    4.10
  -8   3  -1    5.50    5.40
  -8   3  -1    3.70    4.70
   8  -3   1   -1.20    4.20
   8  -3   1   -1.60    4.80
   8  -3   1   -0.10    5.20
   8  -3   1    2.50    4.60
   8  -3   1    1.60    4.50
   8  -3   1    2.30    4.70
   8  -3   1   -4.10    4.40
  -9   3  -1   21.60    6.00
  -9   3  -1   23.70    6.60
  -9   3  -1   18.90    5.30
  -9   3  -1   14.80    6.40
  -9   3  -1   17.40    6.40
  -9   3  -1   22.50    5.90
  -9   3  -1   18.90    6.70
  -9   3  -1   17.10    6.80
   9  -3   1   19.20    5.50
   9  -3   1   19.80    6.80
   9  -3   1   17.40    6.10
   9  -3   1   27.00    7.10
   9  -3   1   12.80    5.60
   9  -3   1   17.40    6.30
   9  -3   1   25.30    6.70
 -10   3  -1  222.68   15.20
 -10   3  -1  214.78   15.80
 -10   3  -1  203.68   15.00
 -10   3  -1  208.18   15.80
 -10   3  -1  216.48   14.90
 -10   3  -1  194.08   14.50
 -10   3  -1  218.98   16.70
  10  -3   1  217.98   16.20
  10  -3   1  215.18   15.30
  10  -3   1  200.38   15.00
  10  -3   1  223.78   15.60
  10  -3   1  219.08   15.00
 -11   3  -1   64.09   10.30
 -11   3  -1   74.09   10.10
 -11   3  -1   54.19    8.50
 -11   3  -1   70.79   10.50
 -11   3  -1   71.29    9.50
 -11   3  -1   61.69    9.00
  11  -3   1   59.79    9.80
  11  -3   1   68.39    8.80
  11  -3   1   69.59   10.00
  11  -3   1   79.69    9.80
  11  -3   1   73.99    9.60
 -12   3  -1   -2.30    5.60
 -12   3  -1    3.50    6.80
 -12   3  -1   -2.00    5.80
 -12   3  -1  -14.50    6.70
 -12   3  -1   10.80    7.10
 -12   3  -1   -4.50    6.60
  12  -3   1  -10.90    6.40
  12  -3   1   10.90    6.70
  12  -3   1   -1.30    6.10
  12  -3   1    0.80    6.50
  12  -3   1    1.00    6.80
 -13   3  -1   49.80    8.70
 -13   3  -1   50.59   10.30
 -13   3  -1   41.30   11.40
 -13   3  -1   43.00    9.20
 -13   3  -1   53.09   10.70
  13  -3   1   41.40   10.30
  13  -3   1   40.90   10.00
  13  -3   1   66.19   10.10
  13  -3   1   56.09   10.00
 -14   3  -1   23.10    8.90
 -14   3  -1   50.89   10.30
  14  -3   1   34.10   11.00
  14  -3   1   25.70    9.90
  14  -3   1   40.40   10.60
  14  -3   1   58.69   10.40
 -15   3  -1   26.90   10.50
  15  -3   1    5.00    9.20
  15  -3   1   22.00   10.30
  15  -3   1   -2.80    7.70
  14   2  -1   39.10   12.20
  14   2  -1   43.60   11.50
  14   2  -1   40.30   11.00
 -14  -2   1   24.80    9.40
  13   2  -1   -9.50    8.90
  13   2  -1   -3.00    9.00
  13   2  -1    9.20    9.60
  13   2  -1   -3.80    8.20
 -13  -2   1   -5.40    7.80
 -13  -2   1   -5.60    5.30
  12   2  -1   23.80    9.40
  12   2  -1   -2.20    6.90
  12   2  -1    8.50    8.50
  12   2  -1    6.00    8.40
 -12  -2   1    9.40    5.60
 -12  -2   1    8.40    7.70
  11   2  -1    2.60    7.10
  11   2  -1    2.80    7.00
  11   2  -1   -2.00    7.10
  11   2  -1   -5.10    6.90
 -11  -2   1   -1.40    6.80
 -11  -2   1   -1.70    5.80
 -11  -2   1   -2.20    4.60
 -11  -2   1   13.70    6.90
  10   2  -1  188.78   15.70
  10   2  -1  196.48   15.70
  10   2  -1  231.68   15.70
  10   2  -1  193.08   16.30
  10   2  -1  203.38   17.00
  10   2  -1  194.38   15.50
 -10  -2   1  198.68   13.50
 -10  -2   1  238.28   16.90
 -10  -2   1  237.98   16.90
 -10  -2   1  186.88   15.10
 -10  -2   1  178.78   14.70
   9   2  -1    6.20    5.50
   9   2  -1   -4.60    6.10
   9   2  -1    2.00    5.80
   9   2  -1    7.60    6.00
   9   2  -1   -7.80    4.10
   9   2  -1    4.20    6.70
   9   2  -1   -5.40    5.30
  -9  -2   1    2.60    3.90
  -9  -2   1   -3.20    4.40
  -9  -2   1   -4.40    4.90
  -9  -2   1   -1.30    4.50
  -9  -2   1   -6.50    5.10
  -9  -2   1    2.90    5.20
   8   2  -1    2.70    4.80
   8   2  -1    5.90    5.40
   8   2  -1   11.30    5.30
   8   2  -1   13.60    6.30
   8   2  -1    7.70    5.30
   8   2  -1    7.60    6.40
   8   2  -1    4.00    6.10
   8   2  -1    8.00    5.70
  -8  -2   1   -2.00    4.80
  -8  -2   1    5.20    5.20
  -8  -2   1   10.10    4.80
  -8  -2   1    1.40    4.70
  -8  -2   1    9.30    6.10
  -8  -2   1    8.70    5.60
  -8  -2   1    7.10    4.70
  -8  -2   1    6.50    4.10
   7   2  -1    9.30    5.10
   7   2  -1    7.80    4.80
   7   2  -1   -3.00    5.40
   7   2  -1    5.50    5.40
   7   2  -1    1.90    4.80
   7   2  -1    5.80    4.90
   7   2  -1    3.60    4.90
   7   2  -1    7.80    5.60
  -7  -2   1    1.20    4.00
  -7  -2   1    0.40    4.90
  -7  -2   1    1.80    4.10
  -7  -2   1   -0.60    5.20
  -7  -2   1    5.90    3.60
  -7  -2   1    1.30    4.20
  -7  -2   1    0.00    4.20
  -7  -2   1    1.40    4.40
   6   2  -1   71.09    7.10
   6   2  -1   74.79    7.30
   6   2  -1   49.90    6.70
   6   2  -1   80.09    7.60
   6   2  -1   51.39    6.50
   6   2  -1   84.39    8.00
   6   2  -1   75.19    8.50
   6   2  -1   60.19    7.60
  -6  -2   1   90.89    8.40
  -6  -2   1   83.79    8.30
  -6  -2   1   67.19    6.80
  -6  -2   1   79.99    7.80
  -6  -2   1   66.19    6.90
  -6  -2   1   66.79    7.00
  -6  -2   1   83.59    8.50
   5   2  -1   45.70    5.70
   5   2  -1   42.30    6.60
   5   2  -1   36.80    5.50
   5   2  -1   60.49    6.10
   5   2  -1   36.20    5.20
   5   2  -1   58.59    6.70
   5   2  -1   44.70    5.90
   5   2  -1   44.70    6.70
   5   2  -1   49.99    5.90
  -5  -2   1   31.60    5.80
  -5  -2   1   49.30    4.90
  -5  -2   1   59.39    6.10
  -5  -2   1   39.70    5.30
  -5  -2   1   44.50    5.30
  -5  -2   1   50.09    6.60
  -5  -2   1   50.79    5.70
   4   2  -1   18.10    4.40
   4   2  -1   16.40    4.40
   4   2  -1   31.40    4.80
   4   2  -1   21.00    4.00
   4   2  -1   24.10    5.60
   4   2  -1   17.10    3.30
   4   2  -1   25.30    4.60
   4   2  -1   20.60    4.10
   4   2  -1   24.70    6.00
  -4  -2   1   20.10    4.30
  -4  -2   1   17.30    4.80
  -4  -2   1   21.70    4.90
  -4  -2   1   20.40    3.80
  -4  -2   1   26.20    4.40
  -4  -2   1   21.00    3.70
  -4  -2   1   17.90    3.70
  -4  -2   1   18.70    4.30
   3   2  -1  194.78   10.50
   3   2  -1  223.58   11.10
   3   2  -1  207.78   11.40
   3   2  -1  192.78   11.00
   3   2  -1  201.98   12.00
   3   2  -1  198.18   12.00
   3   2  -1  216.98   11.20
   3   2  -1  208.18   11.20
  -3  -2   1  210.08   11.00
  -3  -2   1  206.88   11.00
  -3  -2   1  199.38   10.60
  -3  -2   1  222.08   11.50
  -3  -2   1  212.48   11.80
  -3  -2   1  223.38   11.20
  -3  -2   1  201.98   12.00
  -3  -2   1  205.78   10.70
   2   2  -1    6.50    2.60
   2   2  -1    9.40    2.80
   2   2  -1    2.20    2.50
   2   2  -1   10.90    3.10
   2   2  -1   12.40    3.20
   2   2  -1   11.40    4.20
   2   2  -1    6.30    2.80
   2   2  -1   15.80    4.40
  -2  -2   1   10.50    3.70
  -2  -2   1    9.50    2.60
  -2  -2   1   14.70    3.70
  -2  -2   1   14.30    2.60
  -2  -2   1   12.60    2.90
  -2  -2   1   12.50    2.90
  -2  -2   1    7.80    2.90
  -2  -2   1   12.70    4.00
   1   2  -1  338.77   16.30
   1   2  -1  348.47   15.10
   1   2  -1  351.46   15.10
   1   2  -1  352.86   15.40
   1   2  -1  334.47   15.90
   1   2  -1  360.46   15.10
   1   2  -1  338.67   15.00
   1   2  -1  350.56   15.80
  -1  -2   1  352.36   15.60
  -1  -2   1  337.97   16.20
  -1  -2   1  368.06   15.80
  -1  -2   1  359.56   14.90
  -1  -2   1  343.37   14.90
  -1   2  -1  553.14   23.30
  -1   2  -1  529.85   23.20
  -1   2  -1  556.34   23.90
  -1   2  -1  555.54   23.30
  -1   2  -1  531.95   23.30
   1  -2   1  573.24   23.30
   1  -2   1  552.34   23.20
   1  -2   1  545.05   23.90
   1  -2   1  562.74   23.20
  -2   2  -1 1723.43   72.69
  -2   2  -1 1734.63   72.69
  -2   2  -1 1676.63   72.99
  -2   2  -1 1723.83   72.69
  -2   2  -1 1680.13   72.49
  -2   2  -1 1761.02   72.69
  -2   2  -1 1754.52   72.49
   2  -2   1 1790.52   72.59
   2  -2   1 1711.73   72.99
   2  -2   1 1699.23   72.59
   2  -2   1 1792.12   72.69
   2  -2   1 1791.62   72.59
  -3   2  -1  764.52   33.00
  -3   2  -1  769.82   32.90
  -3   2  -1  721.93   33.10
  -3   2  -1  732.13   32.60
  -3   2  -1  744.13   32.60
  -3   2  -1  733.03   32.90
  -3   2  -1  773.22   32.90
   3  -2   1  759.72   32.80
   3  -2   1  770.62   33.00
   3  -2   1  775.12   32.80
   3  -2   1  763.02   32.50
   3  -2   1  755.52   33.30
   3  -2   1  785.62   32.60
   3  -2   1  744.23   32.80
  -4   2  -1   57.29    5.70
  -4   2  -1   44.80    4.90
  -4   2  -1   57.39    6.10
  -4   2  -1   50.19    5.30
  -4   2  -1   66.79    6.20
  -4   2  -1   51.69    5.30
  -4   2  -1   62.29    6.40
   4  -2   1   71.29    6.50
   4  -2   1   62.89    6.20
   4  -2   1   55.89    5.70
   4  -2   1   60.39    6.10
   4  -2   1   54.09    5.30
   4  -2   1   56.79    6.20
   4  -2   1   57.99    5.90
  -5   2  -1  165.08   10.20
  -5   2  -1  174.38   11.30
  -5   2  -1  155.68   11.70
  -5   2  -1  158.08   10.20
  -5   2  -1  139.59    9.90
  -5   2  -1  178.58   10.20
  -5   2  -1  158.58   10.70
   5  -2   1  156.28   10.40
   5  -2   1  170.58   10.60
   5  -2   1  157.38   10.00
   5  -2   1  175.18   10.60
   5  -2   1  140.69   10.20
   5  -2   1  165.48   10.40
   5  -2   1  152.38   10.50
  -6   2  -1   59.89    7.00
  -6   2  -1   66.99    6.50
  -6   2  -1   68.59    7.00
  -6   2  -1   58.49    6.10
  -6   2  -1   64.59    6.80
  -6   2  -1   70.69    7.00
  -6   2  -1   62.79    7.40
  -6   2  -1   43.30    6.20
   6  -2   1   60.29    6.40
   6  -2   1   62.79    6.60
   6  -2   1   86.79    8.10
   6  -2   1   62.09    7.50
   6  -2   1   73.69    7.40
   6  -2   1   75.49    7.40
   6  -2   1   66.09    6.60
  -7   2  -1   10.50    4.60
  -7   2  -1   14.00    4.90
  -7   2  -1    7.70    4.40
  -7   2  -1    9.40    5.20
  -7   2  -1    9.40    4.60
  -7   2  -1   15.60    5.50
  -7   2  -1   12.00    4.90
  -7   2  -1    9.90    5.10
   7  -2   1    9.00    4.90
   7  -2   1    9.80    5.20
   7  -2   1   13.90    5.00
   7  -2   1   16.50    5.50
   7  -2   1    4.90    4.90
   7  -2   1   18.10    4.90
   7  -2   1    8.00    4.30
  -8   2  -1   13.40    5.80
  -8   2  -1    7.30    6.70
  -8   2  -1   13.80    5.80
  -8   2  -1    5.00    4.60
  -8   2  -1   22.30    5.90
  -8   2  -1    6.10    4.70
  -8   2  -1    9.70    5.50
  -8   2  -1   10.90    6.00
   8  -2   1    7.50    5.20
   8  -2   1   10.10    5.90
   8  -2   1   15.30    6.10
   8  -2   1    2.20    5.10
   8  -2   1   10.60    5.00
   8  -2   1   12.60    4.90
   8  -2   1   10.00    5.30
  -9   2  -1    6.40    5.00
  -9   2  -1    0.40    5.00
  -9   2  -1    2.10    5.60
  -9   2  -1    5.10    4.70
  -9   2  -1    9.20    6.50
  -9   2  -1    7.30    5.90
  -9   2  -1    5.30    5.10
  -9   2  -1    9.60    5.60
  -9   2  -1    7.50    6.00
   9  -2   1   10.00    5.70
   9  -2   1    4.10    4.80
   9  -2   1    9.80    5.30
   9  -2   1    0.40    5.30
   9  -2   1    9.40    6.20
   9  -2   1   14.30    6.30
   9  -2   1   -1.50    5.00
 -10   2  -1  105.29   10.60
 -10   2  -1  106.09   11.20
 -10   2  -1   86.59   10.00
 -10   2  -1  104.79   11.40
 -10   2  -1  117.89   11.50
 -10   2  -1  113.29   11.20
 -10   2  -1   77.29   10.40
  10  -2   1  115.99   11.10
  10  -2   1  100.39   11.30
  10  -2   1  136.09   12.40
  10  -2   1  117.79   12.30
  10  -2   1  115.89   11.10
 -11   2  -1    0.90    5.70
 -11   2  -1    1.20    6.80
 -11   2  -1   10.40    6.20
 -11   2  -1    3.30    6.60
 -11   2  -1   13.30    7.10
 -11   2  -1    0.90    5.80
  11  -2   1   10.70    6.50
  11  -2   1   13.00    6.40
  11  -2   1    0.20    6.60
  11  -2   1   -1.40    6.60
  11  -2   1    5.80    7.20
 -12   2  -1  100.49   12.40
 -12   2  -1  116.49   12.50
 -12   2  -1  103.59   11.50
 -12   2  -1  122.19   12.60
 -12   2  -1  125.29   12.00
 -12   2  -1  101.29   13.40
  12  -2   1  119.79   12.10
  12  -2   1  111.89   12.50
  12  -2   1  101.99   11.70
  12  -2   1  108.19   13.10
  12  -2   1  116.39   12.90
 -13   2  -1   -0.60    6.20
 -13   2  -1   19.40    8.40
 -13   2  -1    6.80    7.60
 -13   2  -1   -1.90    6.20
  13  -2   1   10.90    7.90
  13  -2   1    2.20    6.90
  13  -2   1   -4.90    7.80
  13  -2   1    1.50    7.50
 -14   2  -1   13.20    8.30
 -14   2  -1   19.90    9.60
  14  -2   1   24.70    9.50
  14  -2   1   -0.30    8.70
  14  -2   1   22.40    9.20
  14  -2   1    9.90    9.90
 -15   2  -1   50.89   11.40
  15  -2   1   74.59   12.00
  15  -2   1   60.09   11.80
  15  -2   1   43.20   11.00
  15  -2   1   41.90   12.10
  14   1  -1   -5.80   13.40
  14   1  -1   16.90    9.90
  14   1  -1  -12.20    8.90
  14   1  -1    3.80    9.20
 -14  -1   1   -3.70    7.80
 -14  -1   1   14.10    7.50
  13   1  -1   33.30    9.70
  13   1  -1   17.80    8.90
  13   1  -1   20.70    9.90
  13   1  -1   25.90    9.30
 -13  -1   1   15.80    6.60
 -13  -1   1   13.90    7.90
  12   1  -1   30.70    9.00
  12   1  -1   24.80    9.60
  12   1  -1   38.40    9.70
  12   1  -1   26.60    9.10
 -12  -1   1   33.20    7.30
 -12  -1   1   38.40    9.10
 -12  -1   1   36.60    8.50
  11   1  -1   30.30    7.80
  11   1  -1   24.80    8.40
  11   1  -1   33.20    7.60
  11   1  -1   23.30    7.70
  11   1  -1   19.30    7.70
 -11  -1   1   32.40    6.80
 -11  -1   1   23.20    7.00
 -11  -1   1   32.30    7.80
 -11  -1   1   29.30    8.00
  10   1  -1  260.47   17.00
  10   1  -1  289.07   18.40
  10   1  -1  259.17   17.00
  10   1  -1  265.57   18.20
  10   1  -1  277.67   18.80
  10   1  -1  243.78   17.60
 -10  -1   1  293.17   17.60
 -10  -1   1  246.78   16.10
 -10  -1   1  258.57   18.00
 -10  -1   1  251.57   16.60
 -10  -1   1  251.17   17.40
   9   1  -1   32.20    7.00
   9   1  -1   34.70    7.60
   9   1  -1   36.60    7.80
   9   1  -1   21.90    6.60
   9   1  -1   30.30    6.80
   9   1  -1   31.60    7.60
  -9  -1   1   30.30    6.80
  -9  -1   1   26.40    6.20
  -9  -1   1   42.50    8.20
  -9  -1   1   36.50    6.80
  -9  -1   1   26.40    5.70
  -9  -1   1   22.80    6.00
  -9  -1   1   30.00    7.20
   8   1  -1   49.70    7.50
   8   1  -1   34.30    6.30
   8   1  -1   37.80    6.80
   8   1  -1   44.00    7.10
   8   1  -1   45.50    7.60
   8   1  -1   45.80    7.40
   8   1  -1   30.30    6.50
  -8  -1   1   33.90    6.40
  -8  -1   1   30.20    7.20
  -8  -1   1   37.50    5.70
  -8  -1   1   40.20    5.90
  -8  -1   1   47.40    6.80
  -8  -1   1   33.40    6.60
  -8  -1   1   41.90    6.50
  -8  -1   1   41.70    6.80
   7   1  -1  231.88   14.20
   7   1  -1  186.18   13.80
   7   1  -1  221.08   13.40
   7   1  -1  218.58   13.10
   7   1  -1  211.98   14.40
   7   1  -1  196.78   13.20
   7   1  -1  196.48   14.10
   7   1  -1  208.98   14.00
  -7  -1   1  217.98   12.80
  -7  -1   1  226.88   13.20
  -7  -1   1  209.68   13.10
  -7  -1   1  179.38   13.40
  -7  -1   1  203.98   12.60
  -7  -1   1  206.98   14.00
  -7  -1   1  214.78   12.80
  -7  -1   1  210.98   13.30
   6   1  -1  320.87   17.40
   6   1  -1  332.97   17.10
   6   1  -1  328.87   17.10
   6   1  -1  314.67   16.50
   6   1  -1  287.17   17.10
   6   1  -1  311.27   16.60
   6   1  -1  320.27   16.70
  -6  -1   1  311.17   16.80
  -6  -1   1  312.87   16.40
  -6  -1   1  297.57   16.50
  -6  -1   1  293.47   17.10
  -6  -1   1  323.57   16.30
  -6  -1   1  330.07   16.60
  -6  -1   1  309.37   17.40
  -6  -1   1  311.87   16.70
   5   1  -1   49.60    6.30
   5   1  -1   48.70    6.00
   5   1  -1   44.70    5.80
   5   1  -1   33.30    5.90
   5   1  -1   51.69    5.90
   5   1  -1   40.10    5.20
   5   1  -1   54.39    6.30
   5   1  -1   51.89    6.30
  -5  -1   1   68.69    6.60
  -5  -1   1   52.19    6.50
  -5  -1   1   48.70    5.70
  -5  -1   1   51.19    5.70
  -5  -1   1   47.60    5.30
  -5  -1   1   41.50    5.50
  -5  -1   1   50.19    6.20
  -5  -1   1   40.40    5.40
   4   1  -1    8.90    4.20
   4   1  -1    4.10    3.80
   4   1  -1    8.90    3.70
   4   1  -1    2.70    3.60
   4   1  -1    1.80    4.20
   4   1  -1    3.50    4.10
   4   1  -1    5.90    5.20
   4   1  -1    1.10    3.20
   4   1  -1    9.00    4.40
  -4  -1   1    4.30    3.30
  -4  -1   1    4.10    4.00
  -4  -1   1    3.40    4.50
  -4  -1   1    1.50    3.90
  -4  -1   1    7.30    3.40
  -4  -1   1    7.40    3.70
  -4  -1   1    6.40    3.80
  -4  -1   1    8.00    3.30
   3   1  -1  636.44   27.20
   3   1  -1  603.64   26.50
   3   1  -1  580.24   26.30
   3   1  -1  569.94   26.20
   3   1  -1  553.14   26.30
   3   1  -1  614.94   26.70
   3   1  -1  586.14   26.40
   3   1  -1  619.04   27.00
  -3  -1   1  632.84   26.40
  -3  -1   1  626.74   26.50
  -3  -1   1  557.34   26.90
  -3  -1   1  592.14   26.40
  -3  -1   1  596.34   26.60
  -3  -1   1  571.54   26.70
  -3  -1   1  618.34   26.50
   2   1  -1   98.89    6.60
   2   1  -1  101.99    6.00
   2   1  -1  101.49    6.20
   2   1  -1   91.29    6.20
   2   1  -1  103.09    6.30
   2   1  -1  105.09    7.30
   2   1  -1  102.99    7.30
   2   1  -1   87.29    6.30
  -2  -1   1  111.69    6.30
  -2  -1   1  100.69    5.60
  -2  -1   1   99.59    6.10
  -2  -1   1   98.09    6.60
  -2  -1   1   87.69    7.10
  -2  -1   1  103.69    6.20
  -2  -1   1   98.39    7.10
  -2  -1   1  106.99    6.60
   1   1  -1    0.80    1.70
   1   1  -1   -2.20    2.10
   1   1  -1   -2.90    1.40
   1   1  -1    0.80    1.40
   1   1  -1   -1.40    1.40
   1   1  -1   -1.80    2.00
   1   1  -1   -0.50    1.40
   1   1  -1   -2.90    1.20
  -1  -1   1    0.10    1.90
  -1  -1   1    0.50    2.10
  -1  -1   1   -0.70    1.40
  -1  -1   1    2.10    2.30
  -1  -1   1   -2.80    1.40
  -1  -1   1    1.60    1.60
  -1  -1   1    1.60    1.60
  -1  -1   1   -0.90    1.60
  -1   1  -1  119.29    5.30
  -1   1  -1  110.79    4.80
   1  -1   1  104.39    5.20
   1  -1   1  111.99    5.60
   1  -1   1   94.19    5.10
   1  -1   1  115.19    5.30
   1  -1   1  100.59    5.30
  -2   1  -1  126.49    7.30
  -2   1  -1  140.69    7.40
  -2   1  -1  140.49    7.50
  -2   1  -1  140.69    7.60
  -2   1  -1  131.49    7.60
  -2   1  -1  131.29    6.90
   2  -1   1  130.69    7.50
   2  -1   1  131.49    7.40
   2  -1   1  140.29    7.60
   2  -1   1  137.79    7.90
   2  -1   1  140.29    7.00
   2  -1   1  133.19    7.30
   2  -1   1  155.08    7.70
  -3   1  -1  738.53   32.60
  -3   1  -1  791.12   32.60
  -3   1  -1  710.53   32.40
  -3   1  -1  726.03   32.40
  -3   1  -1  752.22   32.50
  -3   1  -1  736.53   32.00
  -3   1  -1  745.73   32.40
  -3   1  -1  722.63   32.60
   3  -1   1  784.42   32.70
   3  -1   1  716.83   32.30
   3  -1   1  769.82   32.60
   3  -1   1  744.63   32.40
   3  -1   1  707.43   32.30
   3  -1   1  720.93   32.30
   3  -1   1  771.32   32.20
  -4   1  -1   19.40    4.90
  -4   1  -1   10.60    4.30
  -4   1  -1   11.10    3.90
  -4   1  -1   12.50    4.10
  -4   1  -1   17.00    4.40
  -4   1  -1    4.30    3.90
  -4   1  -1   10.70    4.40
  -4   1  -1   11.90    4.70
   4  -1   1   13.20    4.10
   4  -1   1    8.10    3.80
   4  -1   1   10.40    4.40
   4  -1   1   16.00    4.20
   4  -1   1   10.40    3.80
   4  -1   1   15.00    4.30
   4  -1   1    4.70    4.30
  -5   1  -1  423.06   21.00
  -5   1  -1  420.26   20.50
  -5   1  -1  444.46   20.80
  -5   1  -1  439.16   20.30
  -5   1  -1  431.46   20.40
  -5   1  -1  391.96   19.90
  -5   1  -1  408.26   20.10
   5  -1   1  375.56   20.10
   5  -1   1  408.86   20.00
   5  -1   1  417.16   20.30
   5  -1   1  434.46   20.40
   5  -1   1  433.46   20.30
   5  -1   1  398.86   20.30
   5  -1   1  393.76   20.00
  -6   1  -1  119.59    9.40
  -6   1  -1  127.59    9.50
  -6   1  -1  122.59    9.80
  -6   1  -1  121.29   10.60
  -6   1  -1  115.69    9.70
  -6   1  -1  143.99   10.40
  -6   1  -1  117.69    9.70
   6  -1   1  140.19    9.90
   6  -1   1  136.79   10.40
   6  -1   1  125.69   10.00
   6  -1   1  125.49    9.80
   6  -1   1  132.69   10.30
   6  -1   1  116.69   10.00
   6  -1   1  128.69    9.60
  -7   1  -1    0.80    4.50
  -7   1  -1    6.80    4.60
  -7   1  -1    3.50    4.10
  -7   1  -1    0.30    4.30
  -7   1  -1   -1.10    4.20
  -7   1  -1   -0.30    4.20
  -7   1  -1   -0.30    5.50
  -7   1  -1    4.30    5.70
   7  -1   1   -2.40    4.50
   7  -1   1    3.20    5.00
   7  -1   1    0.70    4.40
   7  -1   1    1.60    4.60
   7  -1   1    3.40    4.70
   7  -1   1   -2.50    4.30
   7  -1   1    2.10    4.30
  -8   1  -1   62.69    8.00
  -8   1  -1   50.29    7.30
  -8   1  -1   57.39    7.60
  -8   1  -1   46.80    6.80
  -8   1  -1   54.89    7.70
  -8   1  -1   55.29    6.80
  -8   1  -1   48.60    7.00
  -8   1  -1   58.19    7.40
  -8   1  -1   56.39    7.40
   8  -1   1   47.90    6.70
   8  -1   1   63.49    8.00
   8  -1   1   50.69    7.20
   8  -1   1   41.80    6.90
   8  -1   1   53.69    7.50
   8  -1   1   51.89    7.30
   8  -1   1   51.89    7.00
  -9   1  -1   -2.20    5.90
  -9   1  -1    4.00    4.90
  -9   1  -1    7.10    4.70
  -9   1  -1   -0.10    5.80
  -9   1  -1    8.70    5.70
  -9   1  -1   -2.60    4.80
  -9   1  -1    5.90    5.70
  -9   1  -1    4.50    6.10
  -9   1  -1    8.90    5.50
   9  -1   1   13.40    6.50
   9  -1   1    6.70    5.70
   9  -1   1    4.50    5.10
   9  -1   1    6.50    5.50
   9  -1   1    7.10    5.60
   9  -1   1   -2.20    5.00
   9  -1   1   12.30    6.00
 -10   1  -1   40.30    8.10
 -10   1  -1   31.80    6.80
 -10   1  -1   34.90    7.70
 -10   1  -1   24.60    6.90
 -10   1  -1   31.00    6.60
 -10   1  -1   36.90    7.50
 -10   1  -1   25.10    6.90
  10  -1   1   32.40    7.50
  10  -1   1   29.40    7.10
  10  -1   1   27.90    7.30
  10  -1   1   41.90    7.70
  10  -1   1   40.20    8.20
 -11   1  -1   16.10    6.40
 -11   1  -1   16.00    7.40
 -11   1  -1   18.60    6.60
 -11   1  -1   17.30    5.90
 -11   1  -1   16.40    7.00
  11  -1   1    7.00    6.70
  11  -1   1   21.90    8.10
  11  -1   1   10.80    6.60
  11  -1   1    2.10    7.10
  11  -1   1   13.30    6.80
 -12   1  -1   65.69   10.90
 -12   1  -1   88.19   10.20
 -12   1  -1   98.09   11.10
 -12   1  -1   77.79   10.40
  12  -1   1  110.79   12.10
  12  -1   1   82.19   11.10
  12  -1   1   70.29   11.40
  12  -1   1   79.09   10.40
  12  -1   1   62.09   10.10
 -13   1  -1   30.60    8.30
 -13   1  -1   18.20    7.20
 -13   1  -1   23.20    9.00
  13  -1   1   22.20    8.80
  13  -1   1   29.80    9.50
  13  -1   1   41.70    9.60
  13  -1   1   12.70    8.70
 -14   1  -1    9.20    8.80
  14  -1   1   15.90   10.20
  14  -1   1   14.80    8.60
  14  -1   1    8.50    9.10
  14  -1   1   10.80    9.30
  14   0  -1   -6.10    8.80
  14   0  -1   11.30    8.20
  14   0  -1   -5.60    9.00
  14   0  -1  -12.70    8.50
 -14   0   1    0.30    8.80
  13   0  -1    6.70    7.80
  13   0  -1   15.10    7.90
  13   0  -1   12.70    8.60
  13   0  -1   11.30    8.80
 -13   0   1   17.70    8.60
 -13   0   1   12.20    6.70
 -13   0   1    7.90    7.80
  12   0  -1  114.59   13.10
  12   0  -1  137.89   14.20
  12   0  -1  150.68   15.20
  12   0  -1  112.39   12.60
 -12   0   1  125.29   13.20
 -12   0   1  150.08   13.70
 -12   0   1  103.49   11.90
 -12   0   1  124.09   13.20
  11   0  -1  180.78   15.30
  11   0  -1  180.48   15.10
  11   0  -1  136.39   13.50
  11   0  -1  207.28   15.80
  11   0  -1  164.98   15.30
 -11   0   1  187.98   14.90
 -11   0   1  179.98   15.20
 -11   0   1  154.68   14.20
 -11   0   1  188.98   14.30
  10   0  -1   18.20    7.40
  10   0  -1   18.40    7.30
  10   0  -1   19.50    7.30
  10   0  -1   26.50    7.80
  10   0  -1   30.60    7.90
  10   0  -1   24.00    7.60
 -10   0   1   16.10    6.50
 -10   0   1   17.60    6.10
 -10   0   1   17.80    6.50
 -10   0   1   12.10    6.50
 -10   0   1   15.30    6.10
 -10   0   1   20.30    7.30
   9   0  -1   24.60    7.10
   9   0  -1   19.40    6.70
   9   0  -1   14.90    5.50
   9   0  -1   13.40    5.70
   9   0  -1   12.80    5.60
   9   0  -1   17.80    6.40
   9   0  -1   19.20    6.90
  -9   0   1   19.40    5.80
  -9   0   1   17.10    6.40
  -9   0   1   19.90    6.80
  -9   0   1   16.30    6.00
  -9   0   1   17.00    5.50
  -9   0   1   16.10    5.90
  -9   0   1   14.70    6.10
  -9   0   1   17.90    6.10
   8   0  -1  274.67   16.50
   8   0  -1  303.17   16.60
   8   0  -1  241.18   16.00
   8   0  -1  257.67   15.30
   8   0  -1  275.07   16.30
   8   0  -1  280.17   17.00
   8   0  -1  261.17   15.50
  -8   0   1  254.37   15.10
  -8   0   1  256.27   16.00
  -8   0   1  254.67   16.20
  -8   0   1  256.87   15.70
  -8   0   1  225.28   15.20
  -8   0   1  252.17   15.60
  -8   0   1  247.98   15.80
   7   0  -1    5.40    5.20
   7   0  -1   -2.90    5.10
   7   0  -1    2.20    5.30
   7   0  -1    2.30    4.60
   7   0  -1    1.00    4.10
   7   0  -1   -0.50    4.70
   7   0  -1   -1.40    4.50
  -7   0   1    5.60    4.30
  -7   0   1    1.80    4.60
  -7   0   1   -0.30    4.50
  -7   0   1    3.10    4.70
  -7   0   1   16.80    4.70
  -7   0   1    1.30    4.50
  -7   0   1   -2.00    3.90
  -7   0   1    2.30    3.90
   6   0  -1  321.37   16.90
   6   0  -1  365.76   17.60
   6   0  -1  324.27   17.20
   6   0  -1  308.77   16.40
   6   0  -1  334.37   17.70
   6   0  -1  305.97   16.70
   6   0  -1  323.17   17.60
  -6   0   1  328.67   16.90
  -6   0   1  341.77   17.10
  -6   0   1  314.87   16.90
  -6   0   1  287.97   16.20
  -6   0   1  291.07   16.70
  -6   0   1  312.97   17.00
  -6   0   1  298.77   17.00
  -6   0   1  309.67   16.60
   5   0  -1  269.07   14.40
   5   0  -1  246.68   14.90
   5   0  -1  291.67   14.90
   5   0  -1  267.97   15.40
   5   0  -1  286.47   15.30
   5   0  -1  283.27   14.80
   5   0  -1  264.17   15.10
  -5   0   1  285.47   15.10
  -5   0   1  241.88   13.90
  -5   0   1  277.57   14.40
  -5   0   1  277.07   14.60
  -5   0   1  272.17   14.40
  -5   0   1  264.77   14.60
  -5   0   1  294.17   14.80
  -5   0   1  279.67   15.00
   4   0  -1  883.81   41.00
   4   0  -1  936.01   40.90
   4   0  -1  955.30   41.20
   4   0  -1  922.51   40.70
   4   0  -1  969.10   41.00
   4   0  -1  948.11   41.10
   4   0  -1  992.40   41.10
  -4   0   1  960.00   40.60
  -4   0   1  946.51   40.80
  -4   0   1  940.61   40.70
  -4   0   1  875.11   40.80
  -4   0   1  950.00   40.80
  -4   0   1  880.41   40.60
  -4   0   1  953.60   41.10
   3   0  -1  409.46   18.70
   3   0  -1  356.86   18.30
   3   0  -1  399.96   18.80
   3   0  -1  401.56   18.60
   3   0  -1  388.16   19.00
   3   0  -1  390.06   18.80
   3   0  -1  416.56   18.90
   3   0  -1  402.26   18.70
  -3   0   1  414.86   18.60
  -3   0   1  436.36   18.90
  -3   0   1  382.66   18.40
  -3   0   1  392.46   18.80
  -3   0   1  411.46   18.70
  -3   0   1  395.56   18.60
  -3   0   1  394.26   18.20
  -3   0   1  417.66   18.60
   2   0  -1  118.09    6.70
   2   0  -1  125.69    7.00
   2   0  -1  121.09    7.00
   2   0  -1  111.09    7.00
   2   0  -1  122.79    7.00
   2   0  -1  130.59    7.30
   2   0  -1  116.89    6.70
  -2   0   1  123.69    7.00
  -2   0   1  115.69    7.00
  -2   0   1  115.19    6.90
  -2   0   1  120.49    6.50
  -2   0   1  113.59    6.80
  -2   0   1  112.09    6.60
  -2   0   1  112.09    6.70
  -2   0   1  122.29    6.70
   1   0  -1   80.99    4.30
   0   0  -1   -6.80    0.50
   0   0  -1   -8.00    0.70
   0   0  -1   -6.40    0.70
   0   0   1   -6.60    0.80
   0   0   1   -6.40    0.70
  -1   0  -1  125.79    6.80
  -1   0  -1  137.59    6.60
  -1   0  -1  131.29    6.60
  -1   0  -1  125.69    6.70
   1   0   1  126.69    6.30
   1   0   1  136.39    6.60
   1   0   1  134.09    6.50
   1   0   1  128.99    6.50
   1   0   1  144.89    6.50
  -2   0  -1  258.57   12.10
  -2   0  -1  252.67   12.70
  -2   0  -1  255.47   12.50
  -2   0  -1  273.47   12.60
  -2   0  -1  255.57   12.30
  -2   0  -1  290.27   12.60
  -2   0  -1  255.97   12.90
  -2   0  -1  270.77   12.80
   2   0   1  259.57   12.50
   2   0   1  265.37   12.40
   2   0   1  250.57   12.40
   2   0   1  259.87   12.80
   2   0   1  274.07   12.30
   2   0   1  263.97   12.80
   2   0   1  265.17   12.60
   2   0   1  254.77   12.50
  -3   0  -1   18.00    4.20
  -3   0  -1   13.60    4.00
  -3   0  -1   12.00    3.60
  -3   0  -1   18.70    4.30
  -3   0  -1   11.90    4.10
  -3   0  -1   15.00    3.80
  -3   0  -1   19.90    3.70
  -3   0  -1   16.60    3.90
   3   0   1   18.50    4.10
   3   0   1   21.90    4.40
   3   0   1   16.50    4.00
   3   0   1   14.50    4.10
   3   0   1   17.80    4.10
   3   0   1   15.30    3.80
   3   0   1   15.50    3.90
   3   0   1   16.90    4.20
  -4   0  -1  860.81   36.60
  -4   0  -1  859.91   36.70
  -4   0  -1  829.72   36.30
  -4   0  -1  754.82   36.10
  -4   0  -1  790.32   36.50
  -4   0  -1  832.82   36.30
  -4   0  -1  835.92   36.40
  -4   0  -1  828.02   36.20
   4   0   1  787.62   36.20
   4   0   1  795.82   36.30
   4   0   1  842.62   36.40
   4   0   1  815.02   36.40
   4   0   1  862.11   36.60
   4   0   1  834.22   36.50
   4   0   1  807.92   36.70
   4   0   1  873.11   36.90
  -5   0  -1   20.00    4.60
  -5   0  -1   25.60    5.00
  -5   0  -1   27.70    5.80
  -5   0  -1   34.40    5.50
  -5   0  -1   30.10    5.20
  -5   0  -1   29.00    5.00
  -5   0  -1   24.00    4.60
  -5   0  -1   20.30    4.90
   5   0   1   25.60    5.40
   5   0   1   21.20    5.10
   5   0   1   16.30    4.60
   5   0   1   35.60    5.30
   5   0   1   28.60    5.50
   5   0   1   29.00    5.70
   5   0   1   28.90    4.80
   5   0   1   23.60    5.50
  -6   0  -1   47.50    6.50
  -6   0  -1   54.29    6.80
  -6   0  -1   63.69    7.40
  -6   0  -1   70.29    6.90
  -6   0  -1   55.29    6.50
  -6   0  -1   59.99    6.90
  -6   0  -1   57.59    6.80
  -6   0  -1   54.69    6.20
   6   0   1   58.49    6.80
   6   0   1   52.69    6.40
   6   0   1   54.79    7.40
   6   0   1   57.59    7.00
   6   0   1   47.80    6.20
   6   0   1   63.59    7.20
   6   0   1   66.19    7.30
   6   0   1   53.89    6.30
  -7   0  -1   51.29    6.90
  -7   0  -1   70.19    7.80
  -7   0  -1   65.29    6.40
  -7   0  -1   73.99    7.60
  -7   0  -1   78.09    8.40
  -7   0  -1   75.39    7.90
  -7   0  -1   64.49    7.40
  -7   0  -1   46.00    7.30
  -7   0  -1   47.70    6.60
   7   0   1   54.69    7.10
   7   0   1   52.19    7.40
   7   0   1   73.49    7.70
   7   0   1   65.09    7.00
   7   0   1   68.19    7.60
   7   0   1   76.79    8.30
   7   0   1   72.19    7.90
   7   0   1   65.99    7.70
  -8   0  -1    2.90    5.00
  -8   0  -1   13.90    6.00
  -8   0  -1    9.60    5.50
  -8   0  -1    9.70    5.10
  -8   0  -1    9.10    5.10
  -8   0  -1    2.50    4.90
  -8   0  -1   14.50    5.80
  -8   0  -1    6.70    4.10
  -8   0  -1   11.10    5.40
   8   0   1   14.60    6.20
   8   0   1   12.60    5.90
   8   0   1   13.60    5.60
   8   0   1   14.30    5.50
   8   0   1    4.10    5.20
   8   0   1   11.50    5.40
   8   0   1   14.50    5.10
  -9   0  -1    6.50    5.90
  -9   0  -1   -4.50    5.80
  -9   0  -1   -0.30    4.70
  -9   0  -1    0.60    4.10
  -9   0  -1   -1.20    5.10
  -9   0  -1    3.10    5.40
  -9   0  -1    2.80    5.10
  -9   0  -1   -5.60    5.00
   9   0   1    0.30    5.10
   9   0   1    3.90    5.50
   9   0   1   -4.40    4.90
   9   0   1    5.20    5.50
   9   0   1   13.80    6.40
   9   0   1    7.10    5.70
   9   0   1    1.90    5.30
 -10   0  -1   -1.30    6.80
 -10   0  -1    2.80    5.40
 -10   0  -1    7.60    6.20
 -10   0  -1    7.90    6.20
 -10   0  -1    8.50    4.90
 -10   0  -1   11.30    5.90
  10   0   1    5.20    7.10
  10   0   1    5.60    6.70
  10   0   1    4.40    6.10
  10   0   1    7.00    6.50
  10   0   1    2.00    6.00
  10   0   1    0.30    6.70
 -11   0  -1   74.69   10.00
 -11   0  -1   81.79    8.90
 -11   0  -1   74.39   10.30
 -11   0  -1   85.29   10.50
  11   0   1   79.99   10.20
  11   0   1   67.79    9.70
  11   0   1   73.69   10.30
  11   0   1   85.39   10.40
  11   0   1   76.59   11.10
 -12   0  -1   57.99    9.80
 -12   0  -1   58.39    8.30
 -12   0  -1   33.60    7.60
  12   0   1   40.10    9.10
  12   0   1   68.99   11.00
  12   0   1   70.39   10.90
  12   0   1   39.30    9.70
 -13   0  -1    2.30    5.60
 -13   0  -1    6.00    7.20
 -13   0  -1   17.90    8.80
  13   0   1    5.60    7.90
  13   0   1    0.80    8.10
  13   0   1   -4.60    8.60
  13   0   1   -6.70    7.80
 -14   0  -1   24.30    9.90
 -14   0  -1   -0.40    6.00
  14   0   1   11.00    9.20
  14   0   1   -4.70    9.10
  14   0   1    6.60    8.90
  14   0   1    0.50    9.00
  15  -1  -1    4.30    9.60
  15  -1  -1   -2.20    8.40
  15  -1  -1   -4.10    9.40
  15  -1  -1  -12.40    9.40
 -15   1   1    6.60    9.60
  14  -1  -1   24.20    8.60
  14  -1  -1   -2.10    9.60
  14  -1  -1   15.50   10.20
  14  -1  -1   13.40   10.20
 -14   1   1   30.90   10.00
  13  -1  -1   93.19   12.90
  13  -1  -1   90.69   11.50
  13  -1  -1  103.99   13.20
  13  -1  -1   96.19   12.70
 -13   1   1   82.29   10.90
 -13   1   1   89.59   12.50
 -13   1   1   88.49   11.80
 -13   1   1   78.99   13.70
  12  -1  -1   11.20    7.60
  12  -1  -1   30.60    7.90
  12  -1  -1   24.90    9.10
  12  -1  -1   33.10    8.90
  12  -1  -1   30.10    8.40
 -12   1   1   31.20    9.30
 -12   1   1   38.80    8.30
 -12   1   1   33.10    8.10
 -12   1   1   15.10    6.90
  11  -1  -1    6.20    6.30
  11  -1  -1    6.20    6.60
  11  -1  -1   -0.20    6.20
  11  -1  -1    5.80    7.60
  11  -1  -1    6.00    6.90
 -11   1   1   -0.20    6.20
 -11   1   1    5.10    6.20
 -11   1   1   -2.50    6.00
 -11   1   1   -0.30    5.60
 -11   1   1    3.10    5.80
  10  -1  -1   40.90    7.40
  10  -1  -1   50.59    8.70
  10  -1  -1   44.60    7.90
  10  -1  -1   45.00    8.90
  10  -1  -1   43.50    7.80
  10  -1  -1   37.20    8.00
 -10   1   1   60.39    8.40
 -10   1   1   47.50    7.40
 -10   1   1   44.70    8.70
 -10   1   1   43.60    8.50
 -10   1   1   35.80    7.30
 -10   1   1   47.30    7.90
   9  -1  -1  315.17   18.00
   9  -1  -1  253.07   17.40
   9  -1  -1  287.07   18.20
   9  -1  -1  324.87   17.90
   9  -1  -1  280.27   18.20
   9  -1  -1  287.67   18.00
   9  -1  -1  316.57   18.20
  -9   1   1  302.87   18.30
  -9   1   1  318.87   18.20
  -9   1   1  297.57   18.10
  -9   1   1  314.17   18.00
  -9   1   1  294.17   18.10
  -9   1   1  329.07   18.40
  -9   1   1  312.67   17.70
  -9   1   1  301.77   17.80
   8  -1  -1  121.19   11.50
   8  -1  -1  105.49   10.70
   8  -1  -1  100.49   10.90
   8  -1  -1  114.49   11.70
   8  -1  -1  119.79   10.50
   8  -1  -1  122.29   10.80
   8  -1  -1  125.59   10.70
  -8   1   1  113.59   10.30
  -8   1   1  112.79   10.50
  -8   1   1  119.49   11.00
  -8   1   1  117.39   10.30
  -8   1   1  122.69   11.10
  -8   1   1  125.19   10.50
  -8   1   1  107.89   10.20
  -8   1   1  149.69   11.20
   7  -1  -1   22.70    5.10
   7  -1  -1   17.70    5.30
   7  -1  -1   19.20    5.70
   7  -1  -1   23.80    6.10
   7  -1  -1   27.30    6.00
   7  -1  -1   25.20    5.50
   7  -1  -1   15.80    5.10
  -7   1   1   28.20    6.00
  -7   1   1   11.40    4.70
  -7   1   1   14.70    5.90
  -7   1   1   22.90    5.50
  -7   1   1   21.50    5.10
  -7   1   1   21.10    5.30
  -7   1   1   26.00    5.40
  -7   1   1   25.80    5.40
  -7   1   1   26.00    5.60
   6  -1  -1    7.00    5.20
   6  -1  -1   16.70    5.70
   6  -1  -1   11.40    4.80
   6  -1  -1    6.10    4.60
   6  -1  -1    5.60    4.20
   6  -1  -1    9.80    4.30
   6  -1  -1   11.80    4.80
  -6   1   1    6.70    4.70
  -6   1   1    5.10    4.20
  -6   1   1   13.40    4.60
  -6   1   1   -3.20    4.50
  -6   1   1   10.60    5.30
  -6   1   1    5.30    3.90
  -6   1   1   12.90    4.30
  -6   1   1    5.00    4.30
  -6   1   1    8.90    5.10
   5  -1  -1   68.69    6.90
   5  -1  -1   66.39    6.60
   5  -1  -1   52.89    6.20
   5  -1  -1   81.39    7.90
   5  -1  -1   59.79    6.60
   5  -1  -1   62.99    6.70
   5  -1  -1   57.49    5.90
  -5   1   1   72.09    6.90
  -5   1   1   68.89    6.70
  -5   1   1   63.79    6.40
  -5   1   1   79.99    7.00
  -5   1   1   86.09    8.70
  -5   1   1   55.19    6.10
  -5   1   1   78.39    7.90
  -5   1   1   78.39    7.40
  -5   1   1   68.39    7.20
   4  -1  -1   26.40    4.60
   4  -1  -1   24.70    4.60
   4  -1  -1   22.60    5.10
   4  -1  -1   21.40    4.10
   4  -1  -1   19.30    4.50
   4  -1  -1   27.90    5.10
   4  -1  -1   19.00    4.30
  -4   1   1   25.40    4.80
  -4   1   1   13.60    4.60
  -4   1   1   25.30    4.80
  -4   1   1   24.40    5.40
  -4   1   1   22.30    4.50
  -4   1   1   26.00    4.50
  -4   1   1   25.60    4.90
  -4   1   1   19.20    3.70
   3  -1  -1  733.53   31.60
   3  -1  -1  704.53   31.70
   3  -1  -1  758.22   31.80
   3  -1  -1  734.93   31.10
   3  -1  -1  718.03   31.50
   3  -1  -1  726.73   31.80
   3  -1  -1  727.93   31.50
  -3   1   1  727.33   31.80
  -3   1   1  676.93   31.40
  -3   1   1  733.73   31.70
  -3   1   1  706.83   31.70
  -3   1   1  696.73   31.00
  -3   1   1  688.83   31.40
  -3   1   1  743.23   31.70
  -3   1   1  714.43   31.60
   2  -1  -1  685.43   30.10
   2  -1  -1  758.52   30.20
   2  -1  -1  676.73   30.20
   2  -1  -1  676.33   30.30
   2  -1  -1  737.23   30.30
   2  -1  -1  749.62   30.40
   2  -1  -1  672.43   29.70
  -2   1   1  698.03   30.30
  -2   1   1  721.43   29.80
  -2   1   1  664.03   30.10
  -2   1   1  693.53   30.20
  -2   1   1  730.23   30.20
  -2   1   1  661.23   30.20
  -2   1   1  718.83   30.40
  -2   1   1  684.83   30.30
   1  -1  -1   71.19    4.50
   1  -1  -1   55.49    4.10
   1  -1  -1   58.99    4.20
   1  -1  -1   63.39    4.40
   1  -1  -1   61.19    3.90
  -1   1   1   65.69    4.10
  -1   1   1   59.19    4.20
  -1   1   1   48.90    3.80
  -1   1   1   58.39    4.20
   0  -1  -1  232.78   10.60
   0  -1  -1  245.98   11.10
   0  -1  -1  237.58   10.90
   0  -1  -1  243.48   10.90
   0  -1  -1  261.67   10.90
   0  -1  -1  242.28   10.80
   0   1   1  244.88   10.90
   0   1   1  253.37   10.90
   0   1   1  237.08   10.80
  -1  -1  -1   20.90    2.60
  -1  -1  -1   27.60    3.30
  -1  -1  -1   31.50    3.50
  -1  -1  -1   29.70    2.90
  -1  -1  -1   23.80    2.30
  -1  -1  -1   19.30    2.50
   1   1   1   27.10    2.70
   1   1   1   24.40    3.30
   1   1   1   25.50    2.80
   1   1   1   23.80    2.80
   1   1   1   25.50    2.20
   1   1   1   19.40    2.70
   1   1   1   19.00    3.00
  -2  -1  -1  998.00   42.00
  -2  -1  -1  936.41   41.90
  -2  -1  -1  887.71   42.10
  -2  -1  -1  993.40   42.00
  -2  -1  -1 1033.00   41.90
  -2  -1  -1  987.40   42.00
  -2  -1  -1  970.70   42.50
   2   1   1  981.80   42.10
   2   1   1  999.00   42.50
   2   1   1  984.60   42.40
   2   1   1 1035.40   42.20
   2   1   1  947.01   41.80
   2   1   1  983.00   42.10
   2   1   1 1007.60   42.10
   2   1   1 1042.80   42.20
  -3  -1  -1 3646.74  146.19
  -3  -1  -1 3517.55  146.09
  -3  -1  -1 3440.86  146.09
  -3  -1  -1 3472.15  146.09
  -3  -1  -1 3540.45  146.39
  -3  -1  -1 3393.56  146.59
  -3  -1  -1 3543.15  146.19
  -3  -1  -1 3536.75  146.09
   3   1   1 3576.54  146.69
   3   1   1 3608.64  146.19
   3   1   1 3473.45  146.19
   3   1   1 3548.24  146.19
   3   1   1 3387.36  146.09
   3   1   1 3483.45  146.19
   3   1   1 3582.64  146.19
   3   1   1 3263.87  146.29
  -4  -1  -1    9.50    4.50
  -4  -1  -1    2.40    4.10
  -4  -1  -1   10.30    4.50
  -4  -1  -1    5.10    4.40
  -4  -1  -1    7.10    4.10
  -4  -1  -1   11.00    4.20
  -4  -1  -1    5.20    2.80
  -4  -1  -1    8.10    3.90
   4   1   1   10.20    4.40
   4   1   1    9.60    4.30
   4   1   1    4.50    4.30
   4   1   1    5.40    3.70
   4   1   1    9.00    3.70
   4   1   1    8.40    5.00
   4   1   1   12.90    4.20
   4   1   1    7.50    4.40
  -5  -1  -1  259.77   13.80
  -5  -1  -1  199.68   12.90
  -5  -1  -1  229.48   13.10
  -5  -1  -1  229.48   12.90
  -5  -1  -1  232.48   13.40
  -5  -1  -1  230.18   13.90
  -5  -1  -1  218.18   11.90
  -5  -1  -1  228.18   13.20
  -5  -1  -1  215.88   13.70
   5   1   1  245.08   13.30
   5   1   1  228.28   13.20
   5   1   1  247.78   14.10
   5   1   1  242.78   14.20
   5   1   1  244.48   13.60
   5   1   1  207.88   12.90
   5   1   1  230.18   13.30
   5   1   1  219.38   13.00
  -6  -1  -1  131.89    9.60
  -6  -1  -1  124.79    8.70
  -6  -1  -1  120.29   11.10
  -6  -1  -1  114.79   10.00
  -6  -1  -1  117.99    9.10
  -6  -1  -1  114.39   10.10
  -6  -1  -1  121.99   10.40
  -6  -1  -1  120.19    9.70
   6   1   1  132.59   10.00
   6   1   1  123.49   10.60
   6   1   1  133.59   10.50
   6   1   1  127.49   11.10
   6   1   1  145.89   11.30
   6   1   1  113.99   10.60
   6   1   1  115.39   10.00
   6   1   1  102.29   10.00
  -7  -1  -1   85.39    8.40
  -7  -1  -1   95.09   10.40
  -7  -1  -1  100.39    9.90
  -7  -1  -1  104.59   10.50
  -7  -1  -1  100.39    8.10
  -7  -1  -1  112.39   10.10
  -7  -1  -1   99.49    9.70
  -7  -1  -1   83.19    8.60
  -7  -1  -1  118.89   10.00
   7   1   1  106.19    9.80
   7   1   1   96.29    9.20
   7   1   1  113.09   10.40
   7   1   1   82.79    8.80
   7   1   1  119.79   11.00
   7   1   1  112.09   10.10
   7   1   1  100.79   10.40
   7   1   1   96.49    9.30
  -8  -1  -1   30.20    6.80
  -8  -1  -1   24.10    6.00
  -8  -1  -1   26.40    5.60
  -8  -1  -1   25.40    6.60
  -8  -1  -1   14.80    5.30
  -8  -1  -1   21.50    5.90
  -8  -1  -1   19.70    5.30
  -8  -1  -1   18.60    4.50
   8   1   1   19.70    6.60
   8   1   1   24.60    6.40
   8   1   1   21.20    5.80
   8   1   1   17.30    6.50
   8   1   1   31.40    7.40
   8   1   1   20.00    6.00
   8   1   1   19.10    5.90
   8   1   1   23.10    6.90
  -9  -1  -1   60.89    8.80
  -9  -1  -1   62.59    8.40
  -9  -1  -1   48.40    8.00
  -9  -1  -1   79.29    9.50
  -9  -1  -1   51.29    6.40
  -9  -1  -1   40.20    7.00
  -9  -1  -1   47.90    7.70
   9   1   1   69.99    8.40
   9   1   1   59.19    8.40
   9   1   1   62.19    9.30
   9   1   1   55.99    8.60
   9   1   1   44.80    8.50
   9   1   1   36.40    7.30
   9   1   1   49.60    7.90
   9   1   1   56.19    8.60
 -10  -1  -1    1.40    6.30
 -10  -1  -1    0.10    5.60
 -10  -1  -1    0.10    4.10
 -10  -1  -1    4.20    6.20
 -10  -1  -1   -2.40    6.40
  10   1   1    8.90    6.50
  10   1   1    1.40    6.40
  10   1   1    1.70    6.60
  10   1   1    4.90    6.50
  10   1   1    2.30    5.80
  10   1   1    5.00    6.50
 -11  -1  -1    4.60    6.30
 -11  -1  -1    3.80    6.00
 -11  -1  -1    2.00    4.90
 -11  -1  -1   -0.40    5.90
  11   1   1    5.20    6.50
  11   1   1    3.20    7.10
  11   1   1    7.80    7.30
  11   1   1   12.90    7.70
  11   1   1   -0.20    6.40
 -12  -1  -1   -1.80    5.50
 -12  -1  -1   -1.20    6.90
 -12  -1  -1   11.10    5.80
  12   1   1    0.90    7.90
  12   1   1   10.80    8.20
  12   1   1   -1.30    6.70
  12   1   1    0.30    7.80
 -13  -1  -1    0.80    5.20
 -13  -1  -1   -5.50    7.50
  13   1   1   -5.40    7.90
  13   1   1    3.40    8.60
  13   1   1    3.70    8.60
  13   1   1    5.10    7.80
 -14  -1  -1   46.90   10.10
  14   1   1   16.70   10.60
  14   1   1   13.00   10.40
  14   1   1   37.80   11.20
  15  -2  -1  105.49   14.80
  15  -2  -1  125.79   14.20
  15  -2  -1  110.89   15.40
  15  -2  -1   92.59   14.10
 -15   2   1  113.29   14.60
  14  -2  -1   65.19   10.60
  14  -2  -1   68.89   11.90
  14  -2  -1   56.49   11.80
  14  -2  -1   55.29   11.30
 -14   2   1   40.80   10.40
  13  -2  -1   42.60    8.70
  13  -2  -1   26.80    9.40
  13  -2  -1   48.40   10.40
  13  -2  -1   43.40   10.50
 -13   2   1   35.10    9.50
 -13   2   1   46.50    8.80
 -13   2   1   32.80    8.20
  12  -2  -1   14.30    6.60
  12  -2  -1   10.60    6.90
  12  -2  -1   14.30    7.60
  12  -2  -1   -7.40    7.10
  12  -2  -1   -4.20    7.20
 -12   2   1    4.10    7.20
 -12   2   1   13.50    6.40
 -12   2   1   11.60    6.70
 -12   2   1    4.00    7.60
 -12   2   1    8.90    7.30
  11  -2  -1  142.19   12.70
  11  -2  -1  115.29   12.40
  11  -2  -1  117.49   12.30
  11  -2  -1  108.19   11.60
  11  -2  -1  102.79   11.80
 -11   2   1  109.59   11.80
 -11   2   1  131.99   13.30
 -11   2   1  101.19   10.70
 -11   2   1  127.39   12.80
 -11   2   1  125.59   12.10
  10  -2  -1   36.20    7.10
  10  -2  -1   23.10    6.60
  10  -2  -1   27.10    7.60
  10  -2  -1   45.60    8.60
  10  -2  -1   23.90    7.50
 -10   2   1   40.10    9.00
 -10   2   1   37.20    6.90
 -10   2   1   51.49    8.10
 -10   2   1   49.50    8.30
 -10   2   1   28.50    6.90
 -10   2   1   42.10    8.00
 -10   2   1   32.00    6.90
   9  -2  -1   15.40    5.90
   9  -2  -1   30.30    7.00
   9  -2  -1    5.70    5.50
   9  -2  -1   20.20    5.50
   9  -2  -1   25.80    6.30
   9  -2  -1   23.90    6.60
   9  -2  -1   21.50    6.40
  -9   2   1   15.70    5.10
  -9   2   1   23.80    6.50
  -9   2   1   15.00    6.00
  -9   2   1   26.30    6.40
  -9   2   1    8.50    5.70
  -9   2   1   31.00    6.60
  -9   2   1    6.50    5.60
  -9   2   1   26.90    6.40
   8  -2  -1   22.00    5.30
   8  -2  -1   22.20    6.30
   8  -2  -1   32.30    6.80
   8  -2  -1   25.90    6.30
   8  -2  -1   29.30    6.20
   8  -2  -1   17.90    5.80
   8  -2  -1   19.30    5.30
  -8   2   1   12.90    5.50
  -8   2   1   17.30    5.20
  -8   2   1   16.10    5.40
  -8   2   1   20.20    5.70
  -8   2   1   14.30    4.90
  -8   2   1   13.30    6.00
  -8   2   1   23.90    5.80
  -8   2   1   25.00    5.40
  -8   2   1   21.90    6.70
   7  -2  -1   -2.60    3.80
   7  -2  -1    7.60    4.40
   7  -2  -1    5.70    5.20
   7  -2  -1    4.00    4.30
   7  -2  -1   -0.60    4.80
   7  -2  -1    5.80    4.80
   7  -2  -1    1.90    4.80
  -7   2   1    4.40    4.70
  -7   2   1    4.20    4.70
  -7   2   1    8.70    4.70
  -7   2   1   -0.80    3.70
  -7   2   1   10.50    4.50
  -7   2   1    3.20    4.40
  -7   2   1    8.30    5.60
  -7   2   1   -3.40    4.40
  -7   2   1    2.00    4.50
   6  -2  -1    0.50    4.90
   6  -2  -1    6.00    4.80
   6  -2  -1    3.50    4.50
   6  -2  -1    6.90    3.90
   6  -2  -1    0.10    4.40
   6  -2  -1    1.20    4.10
   6  -2  -1    7.50    4.40
  -6   2   1    0.20    4.80
  -6   2   1    4.10    4.60
  -6   2   1    4.50    4.50
  -6   2   1   -1.50    3.40
  -6   2   1   -0.10    4.80
  -6   2   1   -1.90    4.40
  -6   2   1    2.60    4.70
  -6   2   1   -2.90    4.10
   5  -2  -1   17.10    3.90
   5  -2  -1   12.00    4.80
   5  -2  -1   17.30    4.90
   5  -2  -1   16.90    5.30
   5  -2  -1   17.20    4.80
   5  -2  -1    8.30    4.80
   5  -2  -1   22.80    4.70
  -5   2   1   16.10    4.80
  -5   2   1   14.80    4.30
  -5   2   1   13.10    4.40
  -5   2   1   27.30    5.00
  -5   2   1   11.70    4.60
  -5   2   1   18.60    3.70
  -5   2   1   11.40    4.80
  -5   2   1   16.70    4.70
   4  -2  -1  333.37   16.60
   4  -2  -1  332.47   16.40
   4  -2  -1  329.07   16.70
   4  -2  -1  340.77   15.30
   4  -2  -1  324.77   16.20
   4  -2  -1  305.47   16.30
   4  -2  -1  315.97   16.20
  -4   2   1  304.07   16.10
  -4   2   1  326.27   16.30
  -4   2   1  331.97   16.40
  -4   2   1  320.07   16.30
  -4   2   1  318.77   16.60
  -4   2   1  316.77   15.10
  -4   2   1  333.07   16.60
   3  -2  -1  112.69    8.30
   3  -2  -1  129.39    6.80
   3  -2  -1  120.89    8.10
   3  -2  -1  132.89    9.20
   3  -2  -1  114.19    8.30
   3  -2  -1  119.99    8.80
   3  -2  -1  123.39    8.30
  -3   2   1  122.49    8.90
  -3   2   1  119.39    8.30
  -3   2   1  135.69    8.70
  -3   2   1  133.09    8.40
  -3   2   1  131.89    6.80
  -3   2   1  117.09    8.10
  -3   2   1  127.59    8.70
   2  -2  -1   -0.60    3.00
   2  -2  -1   -3.00    2.50
   2  -2  -1    0.50    1.20
   2  -2  -1    0.30    2.80
   2  -2  -1   -1.20    2.80
   2  -2  -1   -0.60    2.80
  -2   2   1    3.30    3.00
  -2   2   1    0.10    3.10
  -2   2   1    3.00    3.60
  -2   2   1   -3.10    2.70
  -2   2   1    0.30    2.90
  -2   2   1   -4.10    2.90
   1  -2  -1  428.36   18.10
   1  -2  -1  400.16   17.90
   1  -2  -1  399.66   17.40
   1  -2  -1  443.96   17.60
   1  -2  -1  405.26   18.00
   1  -2  -1  399.26   18.00
  -1   2   1  399.56   18.00
  -1   2   1  396.76   18.10
  -1   2   1  414.36   17.60
  -1   2   1  407.76   18.10
  -1   2   1  414.86   18.00
  -1   2   1  393.26   17.40
   0  -2  -1   20.00    3.70
   0  -2  -1   17.00    2.50
   0  -2  -1   13.90    2.60
   0  -2  -1   23.40    3.00
   0  -2  -1   19.80    2.80
   0  -2  -1   17.40    2.80
   0   2   1   18.20    2.70
   0   2   1   16.80    2.80
   0   2   1   21.20    2.80
   0   2   1   20.90    2.70
   0   2   1   24.40    4.20
   0   2   1   18.70    2.60
  -1  -2  -1   37.50    4.60
  -1  -2  -1   25.60    3.50
  -1  -2  -1   41.00    3.70
  -1  -2  -1   38.00    3.50
  -1  -2  -1   34.60    3.40
  -1  -2  -1   37.30    4.40
   1   2   1   34.60    3.70
   1   2   1   33.90    3.60
   1   2   1   35.60    4.80
   1   2   1   33.50    3.70
   1   2   1   36.70    3.70
   1   2   1   34.60    4.00
   1   2   1   36.10    3.30
  -2  -2  -1 2505.25   96.69
  -2  -2  -1 2394.66   95.89
  -2  -2  -1 2323.97   95.99
  -2  -2  -1 2228.48   95.89
  -2  -2  -1 2344.37   95.79
  -2  -2  -1 2241.48   96.59
   2   2   1 2234.98   96.59
   2   2   1 2395.86   96.69
   2   2   1 2204.68   95.89
   2   2   1 2320.87   96.09
   2   2   1 2242.98   95.89
   2   2   1 2203.88   95.89
   2   2   1 2154.88   95.59
  -3  -2  -1   13.10    4.50
  -3  -2  -1   14.00    3.90
  -3  -2  -1   13.40    2.20
  -3  -2  -1   11.90    3.60
  -3  -2  -1    7.40    4.30
  -3  -2  -1   12.00    3.60
   3   2   1   12.00    4.20
   3   2   1    2.50    3.70
   3   2   1   10.70    4.70
   3   2   1   11.90    4.70
   3   2   1   12.30    3.70
   3   2   1    9.90    4.70
   3   2   1   13.70    3.50
   3   2   1    7.50    3.60
  -4  -2  -1  173.78   10.30
  -4  -2  -1  171.88   10.40
  -4  -2  -1  180.08   11.10
  -4  -2  -1  191.48   11.50
  -4  -2  -1  171.08    8.80
  -4  -2  -1  167.28   11.60
   4   2   1  172.08   10.70
   4   2   1  162.48   11.30
   4   2   1  158.68   11.40
   4   2   1  180.58   10.80
   4   2   1  173.48   10.50
   4   2   1  168.18   11.80
   4   2   1  163.58   10.90
   4   2   1  159.58   10.20
  -5  -2  -1  463.75   22.90
  -5  -2  -1  435.96   21.20
  -5  -2  -1  427.76   21.00
  -5  -2  -1  460.05   21.30
  -5  -2  -1  448.96   21.90
  -5  -2  -1  428.96   21.30
  -5  -2  -1  435.06   20.00
   5   2   1  436.46   21.70
   5   2   1  423.86   21.20
   5   2   1  436.26   22.30
   5   2   1  467.15   21.70
   5   2   1  452.35   21.50
   5   2   1  433.96   22.40
   5   2   1  413.26   22.00
   5   2   1  437.16   21.70
  -6  -2  -1    9.80    5.20
  -6  -2  -1    7.30    4.50
  -6  -2  -1   11.70    3.40
  -6  -2  -1    9.50    4.60
  -6  -2  -1   14.60    5.20
  -6  -2  -1   12.40    5.10
  -6  -2  -1    9.80    5.10
  -6  -2  -1   13.70    4.70
   6   2   1   10.60    4.90
   6   2   1   14.30    5.40
   6   2   1   11.60    4.70
   6   2   1    8.60    5.30
   6   2   1   10.20    4.60
   6   2   1    9.70    4.90
   6   2   1   21.60    6.20
   6   2   1    9.80    4.90
  -7  -2  -1  137.39   10.20
  -7  -2  -1  157.98   12.00
  -7  -2  -1  129.19   10.80
  -7  -2  -1  164.28   11.10
  -7  -2  -1  129.39    9.00
  -7  -2  -1  147.99   12.50
  -7  -2  -1  123.39   10.90
  -7  -2  -1  165.18   11.90
   7   2   1  151.28   12.30
   7   2   1  140.49   12.00
   7   2   1  148.69   11.50
   7   2   1  137.49   10.90
   7   2   1  150.98   12.40
   7   2   1  140.69   11.00
   7   2   1  134.49   12.00
   7   2   1  125.39   11.30
  -8  -2  -1   78.99    8.60
  -8  -2  -1   66.59    7.70
  -8  -2  -1   73.19    8.60
  -8  -2  -1   76.79    7.30
  -8  -2  -1   67.89    8.70
  -8  -2  -1   73.39    9.00
  -8  -2  -1   67.69    7.60
  -8  -2  -1   65.39    8.50
   8   2   1   75.79    8.30
   8   2   1   71.39    8.90
   8   2   1   72.99    8.20
   8   2   1   78.59    9.10
   8   2   1   85.09    9.20
   8   2   1   66.79    8.70
   8   2   1   63.39    8.80
   8   2   1   63.09    8.40
  -9  -2  -1  126.89   13.10
  -9  -2  -1  112.69   10.80
  -9  -2  -1  104.89    8.80
  -9  -2  -1  130.99   13.80
  -9  -2  -1   82.89    9.50
  -9  -2  -1  114.09   11.30
   9   2   1  118.99   11.30
   9   2   1  121.49   12.00
   9   2   1  111.59   11.30
   9   2   1  103.19   11.40
   9   2   1  120.69   12.50
   9   2   1  117.79   11.60
   9   2   1  106.09   11.10
   9   2   1  132.09   14.10
 -10  -2  -1   19.50    7.10
 -10  -2  -1   16.20    4.90
 -10  -2  -1   33.10    8.30
 -10  -2  -1   11.20    6.50
  10   2   1   16.20    8.20
  10   2   1   25.50    8.10
  10   2   1   24.90    8.40
  10   2   1   11.60    7.30
  10   2   1    0.80    6.60
  10   2   1   21.20    7.70
  10   2   1   18.00    6.90
 -11  -2  -1    0.20    6.70
 -11  -2  -1   -0.90    4.30
 -11  -2  -1    8.40    6.40
  11   2   1   14.50    8.00
  11   2   1   -4.70    7.30
  11   2   1   -7.40    7.20
  11   2   1   12.60    7.30
  11   2   1  -11.00    6.40
 -12  -2  -1   17.60    5.40
 -12  -2  -1   12.70    7.80
  12   2   1   16.00    9.30
  12   2   1   25.40    9.50
  12   2   1   33.40    9.50
  12   2   1   23.00    9.20
 -13  -2  -1   23.20    8.40
  13   2   1   31.60   10.60
  13   2   1   17.30   10.20
  13   2   1   35.00   10.60
  13   2   1   27.80   12.20
 -14  -2  -1    7.20    8.70
  14   2   1   31.50   10.70
  14   2   1    5.30   10.10
  14   2   1   15.20   10.40
  15  -3  -1   -6.40    9.00
  15  -3  -1  -16.40    7.80
  15  -3  -1   10.50    7.70
 -15   3   1   10.30    9.90
  14  -3  -1   -4.60    8.40
  14  -3  -1   10.00    9.30
  14  -3  -1   -1.80    6.90
  14  -3  -1    7.80    9.50
 -14   3   1   17.10    8.60
 -14   3   1   12.90    7.10
 -14   3   1    2.80    7.50
  13  -3  -1   11.80    8.70
  13  -3  -1   17.30    7.90
  13  -3  -1   20.60    7.70
  13  -3  -1   10.70    8.10
 -13   3   1   17.30    9.10
 -13   3   1   20.90    9.50
 -13   3   1   11.30    6.60
  12  -3  -1   26.60    7.00
  12  -3  -1   26.70    8.00
  12  -3  -1   27.80    8.00
  12  -3  -1   41.80    9.70
  12  -3  -1   27.00    8.60
 -12   3   1   40.80    9.60
 -12   3   1   32.20    8.20
 -12   3   1   31.10    8.70
 -12   3   1   26.50    8.40
 -12   3   1   16.80    6.50
  11  -3  -1   58.59    7.70
  11  -3  -1   54.29    8.90
  11  -3  -1   67.89    9.80
  11  -3  -1   56.39    8.70
  11  -3  -1   50.69    9.20
 -11   3   1   58.79    9.00
 -11   3   1   62.19    8.20
 -11   3   1   61.39   10.30
 -11   3   1   54.59    8.60
 -11   3   1   43.60    9.00
  10  -3  -1    7.20    5.70
  10  -3  -1   16.40    5.60
  10  -3  -1   12.60    6.40
  10  -3  -1    6.00    6.70
  10  -3  -1   -0.50    6.40
 -10   3   1   -0.50    5.20
 -10   3   1    8.80    7.30
 -10   3   1    5.40    6.20
 -10   3   1   12.20    6.30
 -10   3   1   12.60    6.20
 -10   3   1   11.70    6.60
 -10   3   1    9.80    5.30
 -10   3   1   16.10    6.30
   9  -3  -1    9.90    6.00
   9  -3  -1   30.50    6.10
   9  -3  -1   27.00    6.70
   9  -3  -1   20.20    5.10
   9  -3  -1   19.30    6.40
   9  -3  -1   22.00    6.60
   9  -3  -1   36.00    7.40
  -9   3   1   27.10    6.70
  -9   3   1   28.70    6.40
  -9   3   1   18.70    6.20
  -9   3   1   14.60    6.90
  -9   3   1   19.10    6.20
  -9   3   1   26.00    6.80
  -9   3   1   29.00    7.10
  -9   3   1   23.90    5.20
  -9   3   1   33.50    6.60
   8  -3  -1   12.40    5.40
   8  -3  -1   11.20    4.60
   8  -3  -1    7.60    5.10
   8  -3  -1   13.10    5.70
   8  -3  -1   28.50    6.10
   8  -3  -1    7.30    5.10
   8  -3  -1   21.30    5.70
  -8   3   1   19.20    6.40
  -8   3   1    8.80    5.10
  -8   3   1   16.00    5.60
  -8   3   1    4.20    5.50
  -8   3   1    2.80    5.10
  -8   3   1   11.90    5.20
  -8   3   1    6.00    5.20
  -8   3   1   16.20    4.40
   7  -3  -1 1010.90   44.10
   7  -3  -1 1001.10   42.50
   7  -3  -1  958.30   43.40
   7  -3  -1  946.41   43.50
   7  -3  -1 1006.00   43.90
   7  -3  -1  933.71   43.40
   7  -3  -1  913.41   43.50
  -7   3   1  977.30   42.50
  -7   3   1  931.11   43.90
  -7   3   1  967.30   43.60
  -7   3   1 1004.20   43.80
  -7   3   1  962.30   43.90
  -7   3   1  966.70   44.10
  -7   3   1  944.51   43.50
  -7   3   1  970.60   43.70
   6  -3  -1   10.40    4.30
   6  -3  -1   13.50    4.80
   6  -3  -1    8.30    4.50
   6  -3  -1   17.70    5.60
   6  -3  -1   11.40    4.30
   6  -3  -1   21.00    4.00
   6  -3  -1   15.80    5.40
  -6   3   1   23.20    5.40
  -6   3   1   24.00    4.90
  -6   3   1   15.30    5.30
  -6   3   1   15.20    3.60
  -6   3   1   21.80    5.20
  -6   3   1   13.50    5.50
  -6   3   1    9.90    5.20
   5  -3  -1  405.06   20.10
   5  -3  -1  404.56   19.80
   5  -3  -1  404.36   19.80
   5  -3  -1  382.56   19.50
   5  -3  -1  388.16   19.90
   5  -3  -1  403.16   20.00
   5  -3  -1  415.26   18.40
  -5   3   1  390.56   20.00
  -5   3   1  422.46   18.50
  -5   3   1  396.16   20.20
  -5   3   1  414.06   20.20
  -5   3   1  401.36   20.10
  -5   3   1  430.16   19.80
  -5   3   1  413.76   20.30
   4  -3  -1   37.90    5.40
   4  -3  -1   41.60    5.00
   4  -3  -1   44.80    4.10
   4  -3  -1   39.20    5.10
   4  -3  -1   51.99    5.40
   4  -3  -1   45.10    6.00
   4  -3  -1   41.40    5.40
  -4   3   1   47.70    4.10
  -4   3   1   40.40    5.20
  -4   3   1   36.80    5.50
  -4   3   1   36.40    5.40
  -4   3   1   35.80    4.90
  -4   3   1   42.50    5.20
  -4   3   1   32.90    4.80
   3  -3  -1  340.47   16.10
   3  -3  -1  333.57   15.80
   3  -3  -1  337.77   15.80
   3  -3  -1  343.87   15.90
  -3   3   1  324.87   16.00
  -3   3   1  311.97   15.70
  -3   3   1  326.07   15.80
  -3   3   1  318.87   16.30
  -3   3   1  307.37   15.80
  -3   3   1  323.97   16.00
   2  -3  -1  122.89    7.70
   2  -3  -1  131.69    7.80
   2  -3  -1  126.89    8.00
   2  -3  -1  129.39    8.00
   2  -3  -1  134.29    7.60
  -2   3   1  123.99    8.00
  -2   3   1  126.79    8.10
  -2   3   1  118.89    8.00
  -2   3   1  128.69    8.00
  -2   3   1  126.19    7.20
   1  -3  -1  478.15   20.70
   1  -3  -1  471.75   20.30
   1  -3  -1  482.05   21.00
   1  -3  -1  474.75   20.80
   1  -3  -1  487.55   21.00
   1  -3  -1  488.65   21.00
  -1   3   1  468.35   20.50
  -1   3   1  470.75   21.00
  -1   3   1  464.65   21.10
  -1   3   1  472.15   21.10
  -1   3   1  451.95   20.30
  -1   3   1  489.65   21.00
   0  -3  -1  830.62   34.20
   0  -3  -1  795.02   34.10
   0  -3  -1  822.22   34.20
   0  -3  -1  802.22   34.20
   0  -3  -1  801.02   34.60
   0   3   1  767.12   35.30
   0   3   1  808.72   34.30
   0   3   1  793.72   34.50
   0   3   1  801.92   34.30
   0   3   1  788.52   34.40
   0   3   1  803.32   34.30
  -1  -3  -1   27.20    4.90
  -1  -3  -1   27.30    3.60
  -1  -3  -1   14.60    4.00
  -1  -3  -1   22.60    3.50
  -1  -3  -1   23.40    3.10
  -1  -3  -1   24.00    3.40
   1   3   1   18.00    3.40
   1   3   1   26.10    5.10
   1   3   1   18.90    4.30
   1   3   1   21.40    3.40
   1   3   1   21.50    3.60
   1   3   1   20.10    3.50
  -2  -3  -1  286.87   13.60
  -2  -3  -1  274.37   13.40
  -2  -3  -1  278.97   15.00
  -2  -3  -1  266.47   13.20
  -2  -3  -1  296.97   13.70
  -2  -3  -1  276.07   15.00
   2   3   1  256.97   14.80
   2   3   1  266.57   13.10
   2   3   1  270.47   13.80
   2   3   1  302.57   15.20
   2   3   1  279.27   13.60
   2   3   1  282.97   13.70
   2   3   1  265.47   13.60
  -3  -3  -1  209.08    9.30
  -3  -3  -1  208.58   11.50
  -3  -3  -1  226.38   12.60
  -3  -3  -1  205.08   13.40
  -3  -3  -1  213.68   11.60
  -3  -3  -1  212.38   11.30
  -3  -3  -1  225.28   11.50
   3   3   1  192.58   12.40
   3   3   1  196.18   12.80
   3   3   1  215.78   11.70
   3   3   1  209.28   11.70
   3   3   1  214.98   11.70
   3   3   1  211.08   11.40
   3   3   1  212.88   11.30
   3   3   1  213.38   13.20
  -4  -3  -1   38.30    5.20
  -4  -3  -1   41.20    3.80
  -4  -3  -1   40.70    4.90
  -4  -3  -1   39.70    6.30
  -4  -3  -1   44.70    5.30
  -4  -3  -1   34.00    5.60
  -4  -3  -1   52.79    5.30
   4   3   1   35.10    5.60
   4   3   1   33.30    5.10
   4   3   1   44.20    6.60
   4   3   1   48.60    5.40
   4   3   1   39.80    5.20
   4   3   1   39.00    6.50
   4   3   1   51.19    7.10
   4   3   1   41.70    5.70
  -5  -3  -1  471.75   25.40
  -5  -3  -1  529.45   24.40
  -5  -3  -1  495.95   22.60
  -5  -3  -1  512.15   24.30
  -5  -3  -1  531.15   24.40
  -5  -3  -1  561.14   25.30
   5   3   1  501.75   25.90
   5   3   1  528.95   24.40
   5   3   1  507.45   24.50
   5   3   1  493.85   24.40
   5   3   1  544.35   24.50
   5   3   1  511.45   24.90
   5   3   1  529.05   25.80
   5   3   1  512.05   25.60
  -6  -3  -1    1.40    5.20
  -6  -3  -1   -1.10    3.90
  -6  -3  -1    0.30    1.50
  -6  -3  -1    1.40    4.20
  -6  -3  -1    4.40    2.70
  -6  -3  -1    7.80    5.00
  -6  -3  -1    4.20    4.50
   6   3   1    7.60    5.00
   6   3   1    2.00    4.30
   6   3   1    4.40    4.50
   6   3   1    6.90    4.40
   6   3   1    2.50    5.50
   6   3   1   -1.00    5.20
   6   3   1    1.60    4.40
   6   3   1    5.40    5.30
  -7  -3  -1    4.30    4.90
  -7  -3  -1   -0.80    4.40
  -7  -3  -1   -0.10    5.30
  -7  -3  -1    0.30    4.10
  -7  -3  -1    0.30    4.30
  -7  -3  -1    5.70    2.90
  -7  -3  -1   -1.60    3.50
   7   3   1    3.60    4.70
   7   3   1   -2.20    4.80
   7   3   1    2.70    6.00
   7   3   1    0.80    5.00
   7   3   1    0.40    5.50
   7   3   1   -8.50    4.90
   7   3   1    1.30    5.00
   7   3   1    3.40    5.70
  -8  -3  -1   -1.40    5.10
  -8  -3  -1    0.00    5.80
  -8  -3  -1    3.80    3.30
  -8  -3  -1    1.00    4.90
  -8  -3  -1    9.70    5.70
  -8  -3  -1    6.90    5.20
   8   3   1   -1.80    5.30
   8   3   1    7.00    6.10
   8   3   1    2.70    5.50
   8   3   1    9.50    5.70
   8   3   1    3.10    5.50
   8   3   1   -0.40    6.20
   8   3   1    3.40    6.50
   8   3   1    6.50    5.60
  -9  -3  -1  218.78   14.20
  -9  -3  -1  174.48   15.90
  -9  -3  -1  174.38   11.40
  -9  -3  -1  173.88   14.20
   9   3   1  209.58   16.00
   9   3   1  194.58   15.80
   9   3   1  182.28   15.10
   9   3   1  175.28   14.30
   9   3   1  183.58   15.00
   9   3   1  196.38   14.80
   9   3   1  181.18   16.10
 -10  -3  -1   14.10    8.00
 -10  -3  -1    2.80    3.90
 -10  -3  -1    6.20    6.20
 -10  -3  -1   17.00    6.50
  10   3   1   12.70    8.00
  10   3   1   11.10    7.20
  10   3   1    5.80    7.00
  10   3   1   12.50    7.00
  10   3   1   17.20    7.60
  10   3   1   11.70    6.60
  10   3   1    8.70    7.70
 -11  -3  -1   92.59    9.10
 -11  -3  -1   90.49    9.90
 -11  -3  -1   74.29   10.40
  11   3   1   90.69   11.80
  11   3   1   94.49   12.80
  11   3   1   70.49   11.80
  11   3   1   96.39   12.50
  11   3   1   72.99   10.90
 -12  -3  -1    3.80    7.00
 -12  -3  -1    1.40    4.00
  12   3   1   -4.50    8.30
  12   3   1    3.40    8.40
  12   3   1   -2.50    7.60
  12   3   1    0.80    8.10
  12   3   1  -10.50    7.30
 -13  -3  -1   27.60    8.90
  13   3   1    7.90    9.60
  13   3   1   11.10    9.30
  13   3   1   19.80   10.10
  15  -4  -1    6.70    7.10
  15  -4  -1   21.60   10.50
  15  -4  -1   14.30    9.10
 -15   4   1   -5.20    8.70
  14  -4  -1   16.80    9.00
  14  -4  -1   29.00   10.60
  14  -4  -1   12.40    7.40
  14  -4  -1   24.70   10.90
 -14   4   1   17.40    9.70
 -14   4   1   22.30   10.20
 -14   4   1   23.90    8.60
  13  -4  -1   87.99   12.50
  13  -4  -1   71.39   11.30
  13  -4  -1   58.99   10.30
  13  -4  -1   73.29    9.60
 -13   4   1   78.69   11.90
 -13   4   1   67.29    9.20
 -13   4   1   60.09   11.60
  12  -4  -1   50.79   10.10
  12  -4  -1   64.09   10.80
  12  -4  -1   49.10    8.20
  12  -4  -1   52.49    9.60
  12  -4  -1   55.79    9.50
 -12   4   1   49.10   10.00
 -12   4   1   55.09    8.20
 -12   4   1   72.79   11.60
 -12   4   1   46.30   10.20
 -12   4   1   53.49   10.50
  11  -4  -1  202.28   17.20
  11  -4  -1  278.27   18.00
  11  -4  -1  256.57   18.20
  11  -4  -1  249.18   15.80
  11  -4  -1  281.47   18.70
 -11   4   1  243.58   18.30
 -11   4   1  239.98   18.20
 -11   4   1  249.38   17.70
 -11   4   1  242.28   19.10
 -11   4   1  274.07   18.70
 -11   4   1  250.67   15.80
  10  -4  -1  109.29   10.00
  10  -4  -1   91.79   10.20
  10  -4  -1  102.29   11.50
  10  -4  -1  106.19   11.40
  10  -4  -1  124.49   12.20
 -10   4   1  110.69   11.00
 -10   4   1  116.59   12.00
 -10   4   1  114.59   16.60
 -10   4   1  111.89   11.40
 -10   4   1  112.19   11.60
 -10   4   1  124.69   11.80
 -10   4   1  104.89   10.20
 -10   4   1  115.19   11.70
 -10   4   1  112.49   11.30
   9  -4  -1   33.90    6.50
   9  -4  -1   24.20    7.00
   9  -4  -1   51.99    8.00
   9  -4  -1   45.30    6.80
   9  -4  -1   49.10    8.10
   9  -4  -1   37.20    5.50
   9  -4  -1   45.60    7.20
  -9   4   1   45.80    7.50
  -9   4   1   40.70    5.70
  -9   4   1   47.00    7.40
  -9   4   1   50.09    7.70
  -9   4   1   48.40    7.50
  -9   4   1   42.90    7.30
  -9   4   1   36.90    7.70
  -9   4   1   49.90    8.10
   8  -4  -1  169.28   12.60
   8  -4  -1  139.69   11.40
   8  -4  -1  147.69   11.00
   8  -4  -1  122.99   11.40
   8  -4  -1  157.38   12.20
   8  -4  -1  142.89   12.20
   8  -4  -1  161.68   10.10
  -8   4   1  160.08   12.80
  -8   4   1  154.48   11.80
  -8   4   1  138.89   12.10
  -8   4   1  137.19   12.30
  -8   4   1  170.28   12.70
  -8   4   1  157.78   11.90
  -8   4   1  143.99   12.40
  -8   4   1  140.39    9.90
   7  -4  -1   -1.00    4.20
   7  -4  -1    5.00    4.60
   7  -4  -1   -1.40    3.10
   7  -4  -1   -0.60    4.10
   7  -4  -1   -3.60    4.80
   7  -4  -1    5.80    4.80
   7  -4  -1    6.50    4.60
  -7   4   1    1.90    4.30
  -7   4   1    0.90    4.80
  -7   4   1    3.00    4.80
  -7   4   1    2.40    4.70
  -7   4   1    0.00    5.10
  -7   4   1    2.80    3.10
  -7   4   1   -3.40    4.50
   6  -4  -1    9.80    4.60
   6  -4  -1   14.10    4.70
   6  -4  -1   12.20    4.40
   6  -4  -1   14.30    4.50
   6  -4  -1   17.60    5.50
   6  -4  -1    5.40    4.10
   6  -4  -1   23.40    3.20
  -6   4   1   21.00    5.00
  -6   4   1   15.80    3.00
  -6   4   1   18.90    5.40
  -6   4   1   10.50    4.60
  -6   4   1   12.00    5.00
  -6   4   1   12.40    5.00
  -6   4   1   23.20    5.20
   5  -4  -1  195.48   11.90
   5  -4  -1  189.98   12.20
   5  -4  -1  201.48    9.50
   5  -4  -1  196.88   11.50
   5  -4  -1  202.88   11.90
   5  -4  -1  202.58   12.50
  -5   4   1  180.98   12.40
  -5   4   1  206.88   11.90
  -5   4   1  190.18   12.10
  -5   4   1  214.18   12.40
  -5   4   1  203.98   12.40
  -5   4   1  198.68    9.60
  -5   4   1  192.48   12.20
   4  -4  -1   10.40    4.10
   4  -4  -1   18.80    4.20
   4  -4  -1   26.40    4.80
   4  -4  -1   14.90    4.10
  -4   4   1    9.20    4.20
  -4   4   1   14.80    4.40
  -4   4   1   18.90    4.80
  -4   4   1   21.80    4.80
  -4   4   1   14.70    4.50
  -4   4   1   11.90    4.30
   3  -4  -1   96.19    7.20
   3  -4  -1  100.69    7.30
   3  -4  -1   88.89    7.10
   3  -4  -1  104.69    7.90
   3  -4  -1  100.69    7.50
  -3   4   1  101.49    7.80
  -3   4   1   94.49    7.80
  -3   4   1  100.19    7.50
  -3   4   1  105.39    7.10
  -3   4   1   93.49    7.70
   2  -4  -1    8.60    3.30
   2  -4  -1   11.90    3.00
   2  -4  -1    7.10    1.90
   2  -4  -1    8.00    2.90
   2  -4  -1    9.30    3.40
   2  -4  -1    7.60    3.30
  -2   4   1    7.80    1.60
  -2   4   1    8.70    3.40
  -2   4   1    7.50    3.40
  -2   4   1   12.10    2.70
  -2   4   1    6.20    3.50
  -2   4   1    9.70    3.40
   1  -4  -1  411.86   17.40
   1  -4  -1  375.86   17.20
   1  -4  -1  386.46   16.70
   1  -4  -1  396.26   17.20
   1  -4  -1  386.36   17.40
   1  -4  -1  361.06   17.00
  -1   4   1  386.36   17.60
  -1   4   1  373.46   17.00
  -1   4   1  354.66   16.60
  -1   4   1  385.16   17.60
  -1   4   1  371.86   17.40
  -1   4   1  372.56   17.50
   0  -4  -1  111.19    6.70
   0  -4  -1  118.69    6.90
   0  -4  -1  124.59    7.00
   0  -4  -1  103.29    7.80
   0  -4  -1  117.09    7.00
   0   4   1  112.79    7.30
   0   4   1  110.89    9.60
   0   4   1  112.79    5.90
   0   4   1  109.19    7.20
   0   4   1   98.29    7.30
   0   4   1  114.09    7.30
   0   4   1  104.39    7.50
  -1  -4  -1  235.78   11.40
  -1  -4  -1  244.18   11.70
  -1  -4  -1  258.67   11.80
  -1  -4  -1  232.78   12.90
  -1  -4  -1  238.68   13.20
  -1  -4  -1  241.88   11.70
   1   4   1  230.88   13.00
   1   4   1  236.48   12.00
   1   4   1  244.68   11.90
   1   4   1  216.78   12.00
   1   4   1  222.78   13.40
   1   4   1  223.48   11.90
  -2  -4  -1  135.59   10.00
  -2  -4  -1   92.99    9.40
  -2  -4  -1  128.69    7.90
  -2  -4  -1  124.19    7.60
  -2  -4  -1  128.69    8.30
  -2  -4  -1  128.39    8.10
   2   4   1  137.69    5.90
   2   4   1  107.39    7.10
   2   4   1  125.39    8.40
   2   4   1  129.39    8.50
   2   4   1  116.49    9.70
   2   4   1  132.39    8.30
   2   4   1  112.09   10.20
   2   4   1  123.69    8.00
  -3  -4  -1   -0.70    3.60
  -3  -4  -1   -2.90    3.30
  -3  -4  -1   -7.30    4.40
  -3  -4  -1   -2.00    3.10
  -3  -4  -1    1.20    3.30
  -3  -4  -1   -1.70    4.40
   3   4   1   -2.00    3.60
   3   4   1    4.60    3.90
   3   4   1    1.90    4.60
   3   4   1    1.40    4.90
   3   4   1    0.40    3.20
   3   4   1   -5.30    2.80
  -4  -4  -1  110.99    8.70
  -4  -4  -1  108.09   10.40
  -4  -4  -1  104.79    5.50
  -4  -4  -1  115.09    8.30
  -4  -4  -1  123.79    8.20
  -4  -4  -1  111.99    8.10
   4   4   1  110.79    8.50
   4   4   1  114.59   10.30
   4   4   1  115.09   10.40
   4   4   1  102.69   10.40
   4   4   1  112.09    8.50
   4   4   1  105.99    9.00
   4   4   1  101.39    8.90
   4   4   1  118.89    8.80
  -5  -4  -1   14.20    4.30
  -5  -4  -1   20.90    4.70
  -5  -4  -1   20.10    5.80
  -5  -4  -1   15.80    5.80
  -5  -4  -1   17.10    2.40
  -5  -4  -1   18.50    4.50
  -5  -4  -1   17.60    4.20
   5   4   1   16.90    5.20
   5   4   1   10.20    5.70
   5   4   1   13.30    6.20
   5   4   1   18.10    5.90
   5   4   1   13.10    4.60
   5   4   1   17.30    4.90
   5   4   1   11.90    4.80
   5   4   1   12.40    4.70
  -6  -4  -1   21.90    5.00
  -6  -4  -1   27.80    6.40
  -6  -4  -1   21.90    5.20
  -6  -4  -1   29.30    5.30
  -6  -4  -1   27.00    5.30
  -6  -4  -1   30.20    7.10
  -6  -4  -1   26.80    3.00
   6   4   1   24.80    6.20
   6   4   1   28.30    6.70
   6   4   1   21.40    5.50
   6   4   1   29.20    6.90
   6   4   1   31.90    5.90
   6   4   1   27.30    5.60
   6   4   1   31.40    5.90
   6   4   1   22.30    6.20
  -7  -4  -1    3.60    4.50
  -7  -4  -1    2.70    5.30
  -7  -4  -1    3.80    4.50
  -7  -4  -1    0.20    4.50
  -7  -4  -1    2.00    2.60
  -7  -4  -1   -2.40    5.40
  -7  -4  -1    4.10    4.20
   7   4   1   -7.10    4.30
   7   4   1   -1.60    5.50
   7   4   1    5.80    5.70
   7   4   1    4.10    5.00
   7   4   1    2.50    4.90
   7   4   1   -1.30    4.60
   7   4   1   -1.60    6.00
   7   4   1    5.80    6.10
  -8  -4  -1   56.19    6.80
  -8  -4  -1   49.30    8.80
  -8  -4  -1   50.29    5.00
  -8  -4  -1   58.19    7.90
   8   4   1   56.59    8.50
   8   4   1   41.70    7.60
   8   4   1   63.59    9.40
   8   4   1   71.49    8.60
   8   4   1   75.59    9.70
   8   4   1   59.79    8.00
   8   4   1   46.90    7.70
   8   4   1   52.19    8.80
  -9  -4  -1   19.50    3.90
  -9  -4  -1   19.70    4.60
  -9  -4  -1   18.70    6.40
  -9  -4  -1   19.30    7.50
   9   4   1   28.60    8.20
   9   4   1   17.60    7.30
   9   4   1   18.40    7.80
   9   4   1    5.70    7.10
   9   4   1   13.90    6.80
   9   4   1   17.20    8.30
   9   4   1    8.70    6.20
 -10  -4  -1   91.59    8.10
 -10  -4  -1   71.39   10.30
  10   4   1   95.99   11.80
  10   4   1  117.69   12.30
  10   4   1  134.49   12.80
  10   4   1  113.99   13.90
  10   4   1  104.69   13.00
  10   4   1  107.89   12.60
 -11  -4  -1   -3.80    3.60
 -11  -4  -1    3.30    6.50
  11   4   1   -5.80    8.00
  11   4   1    4.90    7.40
  11   4   1   -2.50    7.60
  11   4   1   -2.70    7.60
  11   4   1   11.40    8.50
 -12  -4  -1    1.80    7.10
  12   4   1   14.10    8.70
  12   4   1   14.00    9.30
  12   4   1   25.30    9.40
  12   4   1    5.70    9.10
 -13  -4  -1   -2.00    7.30
  13   4   1   -2.20    8.40
  13   4   1   13.20    9.20
  13   4   1    3.20    9.60
  13   4   1  -16.20    8.50
  15  -5  -1    2.50    8.60
  15  -5  -1   18.10    9.60
 -15   5   1   16.40   10.10
 -15   5   1   36.60   11.70
  14  -5  -1   72.49   13.40
  14  -5  -1   78.29   18.40
  14  -5  -1  101.09   10.50
  14  -5  -1   72.39   12.00
 -14   5   1   82.29   12.60
 -14   5   1   70.69   12.80
  13  -5  -1   33.80    7.30
  13  -5  -1   44.20   10.20
  13  -5  -1   21.10    8.30
  13  -5  -1   25.70    8.00
 -13   5   1   36.80   10.60
 -13   5   1   12.10    8.40
 -13   5   1   42.00    7.30
  12  -5  -1   -8.00    7.10
  12  -5  -1    2.70    7.20
  12  -5  -1    4.20    5.40
  12  -5  -1    3.20    7.40
 -12   5   1    2.50    5.30
 -12   5   1  -17.60    6.90
 -12   5   1   -2.60    6.70
 -12   5   1   -0.10    7.70
 -12   5   1   -9.40    7.70
  11  -5  -1   18.90    7.50
  11  -5  -1   22.40    6.00
  11  -5  -1   15.90    7.80
  11  -5  -1   13.30    6.80
  11  -5  -1   35.90    7.90
 -11   5   1    5.70    7.70
 -11   5   1   23.90    8.40
 -11   5   1   20.90    7.80
 -11   5   1   20.50    7.30
 -11   5   1   15.90    7.80
 -11   5   1   19.60    5.50
  10  -5  -1    2.80    6.10
  10  -5  -1    7.70    5.80
  10  -5  -1    5.80    4.40
  10  -5  -1    2.90    6.00
  10  -5  -1    1.30    5.60
 -10   5   1    5.90    6.00
 -10   5   1   13.80    6.90
 -10   5   1    7.70    6.60
 -10   5   1    6.70    4.30
 -10   5   1    0.60    5.80
 -10   5   1    1.20    6.50
 -10   5   1    0.70    6.60
   9  -5  -1    2.10    5.80
   9  -5  -1    0.00    4.40
   9  -5  -1    1.80    3.80
   9  -5  -1    6.40    5.50
   9  -5  -1   -4.60    5.00
   9  -5  -1    5.00    5.90
  -9   5   1    8.00    5.60
  -9   5   1   -0.30    6.10
  -9   5   1    6.70    5.70
  -9   5   1   -7.60    5.40
  -9   5   1   -0.20    5.30
  -9   5   1   -1.10    6.10
  -9   5   1   -8.30    6.00
  -9   5   1   -3.40    3.30
   8  -5  -1   88.89    9.00
   8  -5  -1   70.89    8.20
   8  -5  -1   91.39    8.80
   8  -5  -1   86.79    6.80
   8  -5  -1   93.19    9.50
   8  -5  -1   74.99    8.20
   8  -5  -1   87.89    9.30
  -8   5   1   65.09    8.30
  -8   5   1   83.09    9.20
  -8   5   1   93.79    9.60
  -8   5   1   75.59    8.60
  -8   5   1  105.49   10.50
  -8   5   1   75.19    8.40
  -8   5   1   80.09    6.90
   7  -5  -1   78.89    5.90
   7  -5  -1   68.79    7.80
   7  -5  -1   79.49    7.70
   7  -5  -1   70.29    7.60
   7  -5  -1   87.99    8.30
   7  -5  -1   87.59    8.20
  -7   5   1   90.19    8.60
  -7   5   1   70.99    7.70
  -7   5   1   83.59    8.70
  -7   5   1   72.39    7.80
  -7   5   1   66.99    8.00
  -7   5   1   70.89    7.80
  -7   5   1   75.59    6.00
   6  -5  -1   44.40    5.70
   6  -5  -1   51.89    6.20
   6  -5  -1   54.09    6.20
   6  -5  -1   44.60    6.10
   6  -5  -1   62.09    6.70
  -6   5   1   38.40    6.10
  -6   5   1   34.20    5.70
  -6   5   1   48.30    6.60
  -6   5   1   46.60    6.40
  -6   5   1   47.90    6.00
  -6   5   1   64.19    7.70
   5  -5  -1    5.20    4.10
   5  -5  -1   -1.40    4.10
   5  -5  -1   -0.50    1.10
   5  -5  -1    6.40    4.10
   5  -5  -1    3.40    3.40
  -5   5   1    4.70    4.40
  -5   5   1   11.80    4.80
  -5   5   1    1.80    4.20
  -5   5   1   -1.90    4.30
  -5   5   1    2.70    4.60
  -5   5   1    5.10    4.30
   4  -5  -1   77.69    6.50
   4  -5  -1   55.89    5.60
   4  -5  -1   69.09    7.10
   4  -5  -1   58.39    5.50
   4  -5  -1   70.19    6.80
  -4   5   1   46.70    5.50
  -4   5   1   62.49    6.10
  -4   5   1   52.69    5.90
  -4   5   1   53.49    5.80
  -4   5   1   57.39    5.70
   3  -5  -1   51.29    5.00
   3  -5  -1   53.59    5.00
   3  -5  -1   46.80    4.70
   3  -5  -1   43.50    5.00
   3  -5  -1   49.10    4.70
  -3   5   1   48.40    5.40
  -3   5   1   46.10    5.20
  -3   5   1   58.19    5.60
  -3   5   1   50.59    4.70
  -3   5   1   50.29    5.50
   2  -5  -1  102.89    7.50
   2  -5  -1   95.59    5.90
   2  -5  -1   98.39    6.60
   2  -5  -1   91.59    6.90
   2  -5  -1   97.59    6.80
   2  -5  -1   98.89    7.20
  -2   5   1   96.09    6.30
  -2   5   1  107.99    7.30
  -2   5   1   97.79    5.70
  -2   5   1  102.19    7.40
  -2   5   1   94.59    7.70
  -2   5   1  110.09    7.30
   1  -5  -1  124.59    7.30
   1  -5  -1  119.59    7.10
   1  -5  -1  105.19    7.30
   1  -5  -1  113.69    7.00
   1  -5  -1  118.49    7.30
  -1   5   1  123.49    7.60
  -1   5   1  103.19    7.20
  -1   5   1  115.19    7.60
  -1   5   1  114.49    7.80
  -1   5   1  123.39    7.70
  -1   5   1  116.79    6.50
  -1   5   1  121.49   10.90
   0  -5  -1   16.60    3.90
   0  -5  -1   15.40    3.00
   0  -5  -1   17.60    2.90
   0  -5  -1   17.20    3.30
   0  -5  -1   15.60    3.20
   0   5   1   15.90    3.60
   0   5   1   23.80    3.70
   0   5   1   18.50    3.50
   0   5   1   18.20    2.60
   0   5   1   12.40    5.20
   0   5   1   13.80    3.60
   0   5   1   17.90    3.70
  -1  -5  -1   38.20    5.40
  -1  -5  -1   52.79    4.70
  -1  -5  -1   51.19    4.70
  -1  -5  -1   47.00    6.30
  -1  -5  -1   47.00    4.30
  -1  -5  -1   54.19    4.90
   1   5   1   35.80    5.20
   1   5   1   42.80    4.70
   1   5   1   41.00    4.50
   1   5   1   58.39    7.00
   1   5   1   49.90    4.80
   1   5   1   49.99    4.60
  -2  -5  -1  303.57   17.30
  -2  -5  -1  317.67   17.70
  -2  -5  -1  336.47   15.60
  -2  -5  -1  343.67   15.70
  -2  -5  -1  318.97   15.40
  -2  -5  -1  320.97   15.30
   2   5   1  316.77   16.00
   2   5   1  327.27   16.00
   2   5   1  325.97   15.90
   2   5   1  320.37   17.50
   2   5   1  312.47   14.10
   2   5   1  329.17   15.90
   2   5   1  317.47   17.90
  -3  -5  -1   85.09    9.20
  -3  -5  -1   88.19    7.00
  -3  -5  -1   87.99    7.50
  -3  -5  -1   94.19    9.60
  -3  -5  -1   94.29    7.10
  -3  -5  -1   79.39    6.60
   3   5   1   92.69    7.90
   3   5   1   75.59    8.00
   3   5   1   69.39    6.60
   3   5   1   75.09    8.30
   3   5   1   88.69    8.10
   3   5   1   88.69    7.20
   3   5   1   84.99    7.60
  -4  -5  -1  375.06   18.00
  -4  -5  -1  362.56   20.10
  -4  -5  -1  368.66   17.80
  -4  -5  -1  382.36   19.80
  -4  -5  -1  361.76   17.60
  -4  -5  -1  364.16   17.80
   4   5   1  331.37   18.20
   4   5   1  388.86   18.70
   4   5   1  354.66   20.10
   4   5   1  343.97   17.60
   4   5   1  365.36   20.50
   4   5   1  347.97   18.40
   4   5   1  347.87   18.20
   4   5   1  368.86   20.10
  -5  -5  -1  103.09    8.30
  -5  -5  -1   94.49    9.80
  -5  -5  -1  102.39    8.20
  -5  -5  -1   93.59    8.40
  -5  -5  -1  102.59   10.50
  -5  -5  -1   95.79    8.10
   5   5   1   94.19    9.40
   5   5   1   96.49    9.40
   5   5   1  107.69    9.20
   5   5   1   87.79    9.50
   5   5   1  101.99   10.30
   5   5   1   76.29    9.20
   5   5   1   82.69    8.60
   5   5   1   98.29    8.60
  -6  -5  -1    8.60    4.50
  -6  -5  -1    4.60    3.90
  -6  -5  -1    5.80    6.00
  -6  -5  -1    9.20    4.10
  -6  -5  -1    2.00    4.20
  -6  -5  -1    4.90    1.90
  -6  -5  -1    1.70    5.70
   6   5   1    8.50    6.40
   6   5   1    3.10    4.40
   6   5   1    3.10    4.70
   6   5   1    5.30    5.10
   6   5   1    4.30    5.10
   6   5   1    3.50    5.90
   6   5   1    1.50    4.60
   6   5   1    9.90    6.20
  -7  -5  -1   -1.50    4.30
  -7  -5  -1    4.80    4.40
  -7  -5  -1    2.00    5.40
  -7  -5  -1   -2.40    5.50
  -7  -5  -1    0.90    2.20
   7   5   1   -3.40    6.20
   7   5   1    3.20    6.30
   7   5   1   -3.00    4.70
   7   5   1    8.00    6.80
   7   5   1   -5.90    5.20
   7   5   1    0.20    5.10
   7   5   1   -0.30    5.10
   7   5   1    4.60    5.00
  -8  -5  -1   39.90    7.80
  -8  -5  -1   24.40    6.70
  -8  -5  -1   31.30    3.80
  -8  -5  -1   36.80    6.10
   8   5   1   33.70    6.90
   8   5   1   21.50    7.80
   8   5   1   44.40    8.70
   8   5   1   37.90    8.00
   8   5   1   34.90    7.60
   8   5   1   41.80    9.60
   8   5   1   39.20    7.10
   8   5   1   22.20    8.40
  -9  -5  -1    1.60    5.60
  -9  -5  -1    9.20    3.00
  -9  -5  -1   10.80    5.60
   9   5   1   16.80    6.70
   9   5   1   18.70    7.80
   9   5   1    6.50    6.20
   9   5   1   -0.50    7.90
   9   5   1   13.90    6.70
   9   5   1   11.70    6.90
   9   5   1    5.00    8.10
 -10  -5  -1    7.10    6.40
 -10  -5  -1    5.30    3.00
  10   5   1   -4.40    6.50
  10   5   1   -2.20    8.20
  10   5   1    3.20    7.60
  10   5   1   -6.80    5.60
  10   5   1   -3.70    7.90
  10   5   1  -15.40    6.40
 -11  -5  -1   25.50    7.80
  11   5   1   39.90   11.20
  11   5   1   32.80    8.90
  11   5   1   40.60    9.50
  11   5   1   39.30   10.30
  11   5   1   48.00   10.80
 -12  -5  -1   80.39   11.00
  12   5   1  102.79   14.20
  12   5   1  128.49   16.30
  12   5   1   71.69   13.00
  12   5   1   78.09   12.30
  15  -6  -1   19.90   10.70
  15  -6  -1   10.60    8.90
 -15   6   1   15.80   10.30
 -15   6   1   -0.80   10.50
  14  -6  -1   33.90    9.40
  14  -6  -1   44.10    7.80
  14  -6  -1   54.79   11.70
 -14   6   1   45.10   10.80
 -14   6   1   29.20   10.00
  13  -6  -1    1.80    7.60
  13  -6  -1   -2.70    6.50
  13  -6  -1   11.20    5.40
  13  -6  -1    9.30    6.70
 -13   6   1   15.10    9.50
 -13   6   1   10.80    8.60
  12  -6  -1   20.20    5.40
  12  -6  -1   16.10    7.60
  12  -6  -1   25.80    7.90
  12  -6  -1   27.80    8.90
 -12   6   1   26.80    9.10
 -12   6   1   31.40    6.10
 -12   6   1   30.40    9.90
 -12   6   1   21.60    9.30
  11  -6  -1  216.98   13.30
  11  -6  -1  221.08   16.60
  11  -6  -1  208.98   17.00
 -11   6   1  206.28   16.60
 -11   6   1  214.18   17.90
 -11   6   1  203.58   18.30
 -11   6   1  237.18   17.70
 -11   6   1  199.18   17.40
 -11   6   1  234.78   13.70
  10  -6  -1   23.70    4.40
  10  -6  -1   25.50    7.80
  10  -6  -1   16.80    6.90
  10  -6  -1   22.30    7.90
 -10   6   1   24.80    7.00
 -10   6   1   23.70    6.90
 -10   6   1   29.90    8.20
 -10   6   1   22.10    7.00
 -10   6   1   33.90    5.10
 -10   6   1   20.40    7.70
 -10   6   1   18.70    7.10
   9  -6  -1  362.76   20.00
   9  -6  -1  362.56   17.20
   9  -6  -1  353.26   19.90
   9  -6  -1  375.46   21.10
   9  -6  -1  351.06   20.00
  -9   6   1  354.76   17.40
  -9   6   1  353.86   20.70
  -9   6   1  298.17   20.50
  -9   6   1  359.16   21.10
  -9   6   1  365.16   20.90
  -9   6   1  372.66   20.80
  -9   6   1  372.06   20.80
   8  -6  -1   31.80    5.90
   8  -6  -1   51.49    7.20
   8  -6  -1   43.40    6.50
   8  -6  -1   30.20    6.30
   8  -6  -1   39.30    6.80
  -8   6   1   35.80    7.50
  -8   6   1   52.79    7.90
  -8   6   1   27.60    6.50
  -8   6   1   34.40    6.90
  -8   6   1   31.80    6.90
  -8   6   1   33.70    6.90
   7  -6  -1  306.97   17.10
   7  -6  -1  316.07   16.60
   7  -6  -1  286.17   16.40
   7  -6  -1  269.07   16.20
   7  -6  -1  290.87   16.80
  -7   6   1  286.07   17.40
  -7   6   1  291.17   16.80
  -7   6   1  306.67   17.00
  -7   6   1  289.07   16.50
  -7   6   1  319.27   17.30
  -7   6   1  287.57   17.10
   6  -6  -1   37.00    5.80
   6  -6  -1   52.89    6.70
   6  -6  -1   24.00    5.00
   6  -6  -1   37.00    5.40
  -6   6   1   38.10    6.20
  -6   6   1   32.30    6.00
  -6   6   1   31.10    5.60
  -6   6   1   46.20    6.30
  -6   6   1   29.00    5.50
  -6   6   1   33.40    6.40
   5  -6  -1   37.90    5.50
   5  -6  -1   25.40    5.00
   5  -6  -1   28.50    4.60
   5  -6  -1   30.50    5.00
   5  -6  -1   25.70    4.90
  -5   6   1   30.90    5.50
  -5   6   1   23.20    5.00
  -5   6   1   36.50    6.10
  -5   6   1   29.10    5.40
  -5   6   1   38.20    5.40
  -5   6   1   31.20    5.50
   4  -6  -1   10.10    3.50
   4  -6  -1    6.60    3.70
   4  -6  -1    4.70    3.60
   4  -6  -1    4.80    3.60
   4  -6  -1    6.50    3.90
  -4   6   1    5.40    3.90
  -4   6   1    5.60    4.00
  -4   6   1    9.10    4.40
  -4   6   1    9.60    4.30
  -4   6   1    8.40    3.60
   3  -6  -1  507.45   23.50
   3  -6  -1  515.45   23.60
   3  -6  -1  490.25   23.30
   3  -6  -1  528.45   23.60
   3  -6  -1  525.45   23.50
  -3   6   1  506.55   22.10
  -3   6   1  510.55   24.00
  -3   6   1  530.55   23.60
  -3   6   1  517.25   24.10
  -3   6   1  557.94   24.10
  -3   6   1  529.15   24.00
   2  -6  -1  223.18   11.20
   2  -6  -1  215.58   10.90
   2  -6  -1  201.38   10.90
   2  -6  -1  213.28   11.00
   2  -6  -1  219.48   11.40
   2  -6  -1  226.58   11.30
  -2   6   1  226.38   12.20
  -2   6   1  215.08   11.90
  -2   6   1  210.58   12.10
  -2   6   1  221.28   12.10
  -2   6   1  229.98   10.90
  -2   6   1  213.18   10.90
   1  -6  -1  228.38   12.40
   1  -6  -1  254.67   12.10
   1  -6  -1  263.47   12.00
   1  -6  -1  249.38   11.90
   1  -6  -1  238.78   11.60
  -1   6   1  221.48   11.30
  -1   6   1  223.58   12.30
  -1   6   1  229.18   12.40
  -1   6   1  253.57   12.60
  -1   6   1  231.98   15.40
  -1   6   1  239.48   12.50
  -1   6   1  245.28   12.60
   0  -6  -1   76.39    6.20
   0  -6  -1   78.39    5.60
   0  -6  -1   61.39    6.00
   0  -6  -1   72.69    5.40
   0  -6  -1   65.89    7.10
   0   6   1   73.09    6.50
   0   6   1   60.69    6.30
   0   6   1   67.49    6.70
   0   6   1   60.89    8.10
   0   6   1   72.49    6.60
   0   6   1   74.59    6.50
   0   6   1   68.09    5.20
  -1  -6  -1   62.79    6.60
  -1  -6  -1   69.79    5.30
  -1  -6  -1   55.09    5.60
  -1  -6  -1   71.49    5.50
  -1  -6  -1   62.39    5.80
   1   6   1   67.79    6.40
   1   6   1   53.29    7.90
   1   6   1   61.19    6.20
   1   6   1   52.49    6.10
   1   6   1   56.09    5.40
   1   6   1   54.39    5.20
  -2  -6  -1   35.70    4.10
  -2  -6  -1   41.70    4.30
  -2  -6  -1   34.70    5.90
  -2  -6  -1   38.70    4.40
  -2  -6  -1   30.00    5.80
  -2  -6  -1   32.40    3.90
   2   6   1   40.30    7.00
   2   6   1   34.20    4.70
   2   6   1   33.60    3.10
   2   6   1   29.50    4.60
   2   6   1   39.80    6.10
   2   6   1   32.20    4.80
   2   6   1   37.00    4.90
  -3  -6  -1    8.30    3.20
  -3  -6  -1   11.00    3.10
  -3  -6  -1   16.90    4.00
  -3  -6  -1   13.20    3.80
  -3  -6  -1   12.00    5.40
  -3  -6  -1   19.90    5.50
   3   6   1    8.00    4.00
   3   6   1   15.50    6.30
   3   6   1   13.00    3.90
   3   6   1    9.70    4.10
   3   6   1    7.10    3.20
   3   6   1    6.80    4.80
   3   6   1    8.20    4.20
  -4  -6  -1    1.20    3.20
  -4  -6  -1    6.50    3.50
  -4  -6  -1    1.70    3.50
  -4  -6  -1    3.20    5.10
  -4  -6  -1    4.10    5.20
  -4  -6  -1    4.60    3.80
   4   6   1   -0.60    4.90
   4   6   1    0.80    5.80
   4   6   1    7.30    4.20
   4   6   1   -2.50    5.50
   4   6   1    3.20    4.40
   4   6   1   -2.50    3.50
   4   6   1    1.80    4.00
  -5  -6  -1    8.40    4.00
  -5  -6  -1    3.60    3.70
  -5  -6  -1   -3.90    3.30
  -5  -6  -1    3.20    5.60
  -5  -6  -1    9.20    5.50
  -5  -6  -1    6.80    3.90
   5   6   1   -0.20    6.10
   5   6   1    0.40    5.70
   5   6   1    0.50    4.80
   5   6   1    4.20    4.80
   5   6   1    3.00    4.50
   5   6   1    4.00    4.10
   5   6   1    7.30    6.00
   5   6   1    0.00    4.50
  -6  -6  -1   15.20    6.50
  -6  -6  -1   15.90    6.60
  -6  -6  -1   14.80    4.80
  -6  -6  -1   12.70    4.80
  -6  -6  -1    9.60    4.20
   6   6   1    8.10    4.60
   6   6   1   11.80    5.60
   6   6   1   11.10    6.90
   6   6   1   11.30    7.00
   6   6   1   10.40    5.50
   6   6   1   13.00    6.70
   6   6   1    8.30    5.20
   6   6   1    6.80    5.40
  -7  -6  -1    5.20    4.90
  -7  -6  -1    9.10    4.70
  -7  -6  -1   12.10    6.80
   7   6   1    5.80    5.20
   7   6   1    8.20    7.40
   7   6   1    0.30    7.20
   7   6   1    4.60    5.20
   7   6   1    3.70    5.50
   7   6   1   11.40    6.30
   7   6   1    9.20    5.60
   7   6   1   12.10    7.10
  -8  -6  -1   -1.50    4.40
  -8  -6  -1   -1.80    4.70
  -8  -6  -1   -0.40    1.80
   8   6   1   -1.10    5.10
   8   6   1    5.90    7.40
   8   6   1    2.80    7.40
   8   6   1    7.70    5.90
   8   6   1   -6.50    7.20
   8   6   1    2.50    5.80
   8   6   1    2.90    6.20
   8   6   1   12.10    6.40
  -9  -6  -1   21.00    6.60
  -9  -6  -1   24.40    3.10
  -9  -6  -1   33.20    6.60
   9   6   1   32.30    8.20
   9   6   1   21.70    9.50
   9   6   1   19.50    8.00
   9   6   1   40.20    9.90
   9   6   1   34.10    7.70
   9   6   1   28.70    9.10
 -10  -6  -1    0.70    5.70
  10   6   1   12.30    9.50
  10   6   1    9.50    7.90
  10   6   1   11.60    8.30
  10   6   1   20.00    8.40
  10   6   1    5.40    8.20
 -11  -6  -1   39.20    8.30
  11   6   1   52.39    9.90
  11   6   1   38.10   11.00
  11   6   1   36.70   11.50
  11   6   1   43.30   10.10
  12   6   1   38.90   11.80
  12   6   1   43.60   11.90
  12   6   1   51.49   11.70
  12   6   1   58.59   11.10
  14  -7  -1    7.90    9.50
 -14   7   1   -0.40    9.20
 -14   7   1   -0.30    9.70
  13  -7  -1  -11.10    7.90
 -13   7   1   12.50    9.30
 -13   7   1   -4.80    7.70
 -13   7   1    4.30    9.10
  12  -7  -1   22.80    7.90
  12  -7  -1   16.90    8.40
 -12   7   1   32.20    8.90
 -12   7   1   41.00   10.20
 -12   7   1   26.70    9.50
  11  -7  -1    0.80    6.50
  11  -7  -1   -3.80    7.00
 -11   7   1   -4.30    6.60
 -11   7   1    0.90    7.40
 -11   7   1    5.20    7.50
 -11   7   1   -4.50    6.80
  10  -7  -1    5.40    5.90
  10  -7  -1   28.60    7.00
 -10   7   1    3.50    6.70
 -10   7   1  -10.20    5.70
 -10   7   1   14.90    6.50
 -10   7   1    2.60    6.40
 -10   7   1   12.20    7.80
 -10   7   1   -0.80    5.80
   9  -7  -1   24.90    8.50
   9  -7  -1   24.40    6.30
   9  -7  -1   26.00    7.40
  -9   7   1   46.40    8.20
  -9   7   1   30.60    7.30
  -9   7   1   25.30    7.10
  -9   7   1   28.60    6.70
  -9   7   1   36.40    7.80
  -9   7   1   20.20    7.50
   8  -7  -1   42.70    6.60
   8  -7  -1   46.20    7.20
   8  -7  -1   42.90    6.80
  -8   7   1   55.49    8.10
  -8   7   1   46.60    8.00
  -8   7   1   45.20    7.80
  -8   7   1   40.80    7.80
  -8   7   1   34.20    6.90
  -8   7   1   43.30    7.50
   7  -7  -1  133.19   10.60
   7  -7  -1  136.39   10.10
   7  -7  -1  122.49   10.00
   7  -7  -1  119.29   10.40
   7  -7  -1  130.89   10.90
  -7   7   1  129.49   11.40
  -7   7   1  126.79   11.30
  -7   7   1  137.39   11.20
  -7   7   1  147.19   11.40
  -7   7   1  116.39   11.90
  -7   7   1  132.69   11.50
   6  -7  -1    3.80    3.80
   6  -7  -1   -0.30    4.20
   6  -7  -1   -3.20    4.00
   6  -7  -1   -2.70    4.00
   6  -7  -1    2.10    3.90
  -6   7   1    1.10    4.60
  -6   7   1   -7.40    4.40
  -6   7   1   -0.10    4.80
  -6   7   1    0.20    4.40
  -6   7   1   -0.70    4.60
  -6   7   1    2.90    5.00
   5  -7  -1   30.20    4.60
   5  -7  -1   31.90    5.20
   5  -7  -1   25.70    5.00
   5  -7  -1   32.90    5.20
   5  -7  -1   35.40    5.20
  -5   7   1   37.70    5.30
  -5   7   1   30.60    5.50
  -5   7   1   32.70    5.60
  -5   7   1   45.40    6.20
  -5   7   1   40.20    6.00
   4  -7  -1  113.89    8.00
   4  -7  -1  110.29    8.10
   4  -7  -1  102.09    7.80
   4  -7  -1  117.59    8.00
   4  -7  -1  107.39    8.40
  -4   7   1  112.09    8.00
  -4   7   1   97.39    8.80
  -4   7   1  116.49    9.00
  -4   7   1  104.09    8.80
  -4   7   1   88.29    8.70
   3  -7  -1    2.10    3.10
   3  -7  -1    0.70    3.20
   3  -7  -1    1.00    2.90
   3  -7  -1    3.00    2.80
   3  -7  -1   -2.50    2.80
  -3   7   1    2.40    2.80
  -3   7   1   -0.70    3.70
  -3   7   1    3.50    3.80
  -3   7   1    6.30    4.20
  -3   7   1    2.40    1.80
  -3   7   1    6.40    3.80
   2  -7  -1   44.70    4.60
   2  -7  -1   42.50    4.30
   2  -7  -1   46.10    4.20
   2  -7  -1   45.00    4.20
   2  -7  -1   40.00    4.30
  -2   7   1   41.40    4.90
  -2   7   1   50.19    5.30
  -2   7   1   41.10    5.10
  -2   7   1   33.50    4.70
  -2   7   1   37.00    3.80
  -2   7   1   36.70    3.90
   1  -7  -1  167.78    9.10
   1  -7  -1  168.38    9.20
   1  -7  -1  178.48    8.90
   1  -7  -1  168.48    8.80
   1  -7  -1  163.38    9.90
  -1   7   1  163.28   12.50
  -1   7   1  165.28    9.80
  -1   7   1  170.88    9.90
  -1   7   1  158.78    9.80
  -1   7   1  150.68    8.70
  -1   7   1  153.78    9.80
  -1   7   1  167.18   10.00
   0  -7  -1  240.98   11.40
   0  -7  -1  239.28   11.80
   0  -7  -1  224.88   13.20
   0  -7  -1  250.57   11.90
   0  -7  -1  230.08   11.30
   0   7   1  227.78   11.50
   0   7   1  226.48   15.00
   0   7   1  230.18   12.60
   0   7   1  238.98   12.30
   0   7   1  234.88   12.60
   0   7   1  237.98   12.50
   0   7   1  226.18   13.10
  -1  -7  -1    9.60    3.20
  -1  -7  -1   15.00    2.80
  -1  -7  -1   21.00    5.00
  -1  -7  -1   13.20    3.30
  -1  -7  -1   12.40    3.00
   1   7   1   15.70    4.00
   1   7   1   12.40    3.80
   1   7   1   10.10    3.50
   1   7   1   12.00    5.90
   1   7   1   13.00    3.80
   1   7   1    7.80    4.40
  -2  -7  -1   -0.80    3.00
  -2  -7  -1    2.10    2.70
  -2  -7  -1    3.60    3.00
  -2  -7  -1   -0.50    2.70
  -2  -7  -1    1.30    4.20
  -2  -7  -1   -1.20    5.20
   2   7   1    1.90    3.70
   2   7   1    1.90    2.20
   2   7   1    1.50    3.50
   2   7   1   -0.70    3.40
   2   7   1   -4.90    4.00
   2   7   1    4.70    3.50
   2   7   1    4.00    6.20
  -3  -7  -1   11.30    3.70
  -3  -7  -1   15.00    3.40
  -3  -7  -1    8.70    3.50
  -3  -7  -1   19.40    3.50
  -3  -7  -1   13.50    5.40
  -3  -7  -1   10.60    6.00
   3   7   1   10.10    4.30
   3   7   1   17.70    4.50
   3   7   1   14.50    4.70
   3   7   1    6.60    5.60
   3   7   1   10.40    4.20
   3   7   1   14.60    3.70
   3   7   1    6.50    5.40
  -4  -7  -1   31.10    4.90
  -4  -7  -1   22.70    6.20
  -4  -7  -1   19.00    6.00
  -4  -7  -1   28.10    4.70
  -4  -7  -1   28.40    4.30
  -4  -7  -1   33.10    4.60
   4   7   1   23.90    5.40
   4   7   1   16.70    6.90
   4   7   1   26.80    7.10
   4   7   1   39.60    5.30
   4   7   1   28.70    5.40
   4   7   1   31.00    7.70
   4   7   1   25.60    5.40
  -5  -7  -1    4.00    3.40
  -5  -7  -1    5.60    4.30
  -5  -7  -1    7.70    4.40
  -5  -7  -1    4.50    5.40
   5   7   1    3.20    5.80
   5   7   1    7.30    5.00
   5   7   1   -0.60    4.20
   5   7   1   11.10    7.40
   5   7   1   10.60    5.20
   5   7   1   10.60    5.40
   5   7   1    6.50    5.10
   5   7   1    1.20    6.70
  -6  -7  -1   19.50    4.50
  -6  -7  -1   12.00    6.80
  -6  -7  -1   15.50    4.90
   6   7   1   22.80    6.50
   6   7   1   22.60    8.60
   6   7   1   16.50    7.90
   6   7   1   25.60    5.50
   6   7   1    5.90    5.30
   6   7   1   21.90    8.60
   6   7   1   26.00    6.20
   6   7   1   24.10    6.20
  -7  -7  -1   -0.60    4.50
  -7  -7  -1   -1.50    6.50
  -7  -7  -1   -3.70    4.20
   7   7   1  -13.40    5.00
   7   7   1   -1.90    5.30
   7   7   1   -0.60    7.60
   7   7   1    8.50    5.90
   7   7   1    6.80    8.20
   7   7   1    9.00    7.70
   7   7   1    4.80    5.80
   7   7   1   10.90    5.50
  -8  -7  -1   -3.00    4.80
  -8  -7  -1    5.20    4.90
   8   7   1    3.30    5.70
   8   7   1   -5.00    7.40
   8   7   1    8.90    7.80
   8   7   1   -4.50    6.10
   8   7   1   10.80    8.60
   8   7   1    8.20    6.50
   8   7   1    0.20    6.20
  -9  -7  -1   31.40    7.00
   9   7   1   36.10   10.60
   9   7   1   49.30   11.10
   9   7   1   20.00    9.60
   9   7   1   42.70    9.00
   9   7   1   21.30    7.90
 -10  -7  -1    4.30    5.80
  10   7   1    7.10    8.30
  10   7   1   15.20    8.40
  10   7   1    1.70    9.50
  10   7   1    6.60    9.40
  11   7   1   -6.60    8.90
  11   7   1    4.90    9.80
  11   7   1    2.50    7.60
  11   7   1    0.40    8.20
  14  -8  -1    8.80    8.50
 -14   8   1   -0.30    8.50
 -14   8   1   19.30    9.00
  13  -8  -1    8.30    8.90
 -13   8   1   13.70    8.80
 -13   8   1    8.20    9.60
 -13   8   1   11.00    8.30
  12  -8  -1    3.30    7.70
  12  -8  -1   15.40   11.50
 -12   8   1   14.20    8.70
 -12   8   1   20.10   10.00
 -12   8   1   13.10    9.20
  11  -8  -1  119.59   11.60
  11  -8  -1  100.29   11.40
 -11   8   1  121.19   12.80
 -11   8   1  101.49   12.50
 -11   8   1  139.59   13.50
  10  -8  -1    1.90    5.40
  10  -8  -1   12.20    6.40
 -10   8   1   19.00    6.80
 -10   8   1   -5.90    6.30
 -10   8   1   -1.20    6.40
 -10   8   1   -0.70    6.50
 -10   8   1   -0.30    6.70
   9  -8  -1   17.80    6.30
  -9   8   1    4.80    6.30
  -9   8   1   35.10    7.20
  -9   8   1   21.80    7.50
  -9   8   1   21.80    7.60
  -9   8   1   23.50    7.30
   8  -8  -1   49.50    7.40
   8  -8  -1   61.99    7.80
   8  -8  -1   58.19    7.80
  -8   8   1   70.69    8.50
  -8   8   1   70.69    9.10
  -8   8   1   59.19    8.60
  -8   8   1   86.79    9.40
  -8   8   1   69.69    8.90
  -8   8   1   61.69    8.20
   7  -8  -1    5.20    4.70
   7  -8  -1    7.60    5.10
   7  -8  -1   16.30    5.10
   7  -8  -1   13.90    4.70
   7  -8  -1   11.40    4.90
  -7   8   1   16.90    6.40
  -7   8   1    9.80    5.50
  -7   8   1    9.00    5.20
  -7   8   1    5.70    5.60
  -7   8   1    8.90    5.30
  -7   8   1   12.80    5.70
   6  -8  -1    5.50    3.60
   6  -8  -1   -5.50    3.80
   6  -8  -1    2.00    4.30
   6  -8  -1   -0.90    4.20
   6  -8  -1   -1.90    3.90
  -6   8   1    4.50    4.80
  -6   8   1   -0.10    4.70
  -6   8   1   -2.40    4.60
  -6   8   1   -0.90    4.60
  -6   8   1   -0.50    5.40
  -6   8   1   -6.40    4.50
   5  -8  -1  351.16   17.70
   5  -8  -1  322.57   17.80
   5  -8  -1  358.26   17.80
   5  -8  -1  360.06   17.90
   5  -8  -1  340.97   17.30
  -5   8   1  345.77   18.80
  -5   8   1  349.07   18.90
  -5   8   1  360.26   18.20
  -5   8   1  371.66   18.70
  -5   8   1  372.26   18.60
   4  -8  -1   14.70    4.00
   4  -8  -1   13.20    3.70
   4  -8  -1   19.90    3.70
   4  -8  -1   14.80    3.90
   4  -8  -1   16.40    4.10
  -4   8   1   18.40    5.00
  -4   8   1   18.30    4.70
  -4   8   1   14.50    3.80
  -4   8   1   18.90    4.80
  -4   8   1   15.60    4.50
   3  -8  -1   37.40    4.30
   3  -8  -1   31.50    3.90
   3  -8  -1   35.50    4.60
   3  -8  -1   36.50    4.50
   3  -8  -1   33.90    4.30
  -3   8   1   36.20    5.00
  -3   8   1   32.40    5.10
  -3   8   1   37.60    5.20
  -3   8   1   32.00    4.10
  -3   8   1   33.40    5.30
  -3   8   1   33.10    3.40
   2  -8  -1  336.67   15.60
   2  -8  -1  313.47   15.10
   2  -8  -1  328.47   15.60
   2  -8  -1  339.67   15.10
  -2   8   1  298.67   15.10
  -2   8   1  330.97   16.50
  -2   8   1  327.57   16.30
  -2   8   1  314.07   16.10
  -2   8   1  320.57   19.30
  -2   8   1  307.07   16.10
  -2   8   1  309.77   15.70
   1  -8  -1   70.59    5.30
   1  -8  -1   76.99    6.10
   1  -8  -1   60.69    5.90
   1  -8  -1   64.99    5.30
   1  -8  -1   65.49    5.60
  -1   8   1   67.29    6.50
  -1   8   1   67.69    6.80
  -1   8   1   60.89    6.00
  -1   8   1   53.19    5.20
  -1   8   1   69.19    7.00
  -1   8   1   65.29    5.90
  -1   8   1   56.09    8.40
   0  -8  -1   52.69    4.60
   0  -8  -1   40.70    4.30
   0  -8  -1   39.50    5.70
   0  -8  -1   48.20    4.60
   0  -8  -1   55.59    5.30
   0   8   1   50.49    5.10
   0   8   1   44.00    8.30
   0   8   1   47.00    5.30
   0   8   1   50.29    5.00
   0   8   1   45.60    5.00
   0   8   1   43.30    5.20
   0   8   1   47.10    5.90
  -1  -8  -1   74.09    7.90
  -1  -8  -1   75.79    6.30
  -1  -8  -1   78.59    5.50
  -1  -8  -1   77.39    5.50
  -1  -8  -1   73.39    6.20
   1   8   1   70.79    7.00
   1   8   1   56.69    7.10
   1   8   1   78.09    7.70
   1   8   1   61.49    8.50
   1   8   1   69.79    6.40
   1   8   1   77.39    6.80
  -2  -8  -1  159.78   12.60
  -2  -8  -1  176.18    9.30
  -2  -8  -1  166.08    9.20
  -2  -8  -1  175.68   10.00
  -2  -8  -1  171.78    9.80
   2   8   1  154.68   10.70
   2   8   1  155.48   12.70
   2   8   1  162.38   10.80
   2   8   1  183.78    9.20
   2   8   1  166.98   10.80
   2   8   1  165.38   11.10
   2   8   1  204.38   14.80
  -3  -8  -1   10.10    6.20
  -3  -8  -1   13.30    4.00
  -3  -8  -1    9.90    3.10
  -3  -8  -1   12.30    5.60
  -3  -8  -1   17.10    4.00
   3   8   1   14.30    4.80
   3   8   1   18.80    2.10
   3   8   1   11.90    3.80
   3   8   1    7.80    4.70
   3   8   1   15.80    7.20
   3   8   1   15.80    4.70
   3   8   1   15.10    4.60
   3   8   1   12.60    5.90
  -4  -8  -1   32.00    4.80
  -4  -8  -1   42.00    5.20
  -4  -8  -1   11.30    6.40
  -4  -8  -1   33.40    4.40
   4   8   1   21.40    5.00
   4   8   1   26.00    5.70
   4   8   1   20.80    7.20
   4   8   1   28.60    5.70
   4   8   1   24.60    5.90
   4   8   1   38.40    8.80
   4   8   1   32.40    8.40
  -5  -8  -1   65.09    6.30
  -5  -8  -1   67.59    6.80
  -5  -8  -1   58.99    9.20
   5   8   1   78.19    7.70
   5   8   1   63.29   10.00
   5   8   1   59.99    9.70
   5   8   1   72.09    8.10
   5   8   1   58.29    7.60
   5   8   1   65.39    8.00
   5   8   1   81.59    8.20
   5   8   1   84.19   10.50
  -6  -8  -1    2.10    6.80
  -6  -8  -1   14.70    4.50
  -6  -8  -1    5.40    4.30
   6   8   1    0.30    8.20
   6   8   1   -0.40    5.30
   6   8   1   10.40    6.10
   6   8   1   14.70    5.20
   6   8   1   12.90    5.40
   6   8   1    6.10    8.40
   6   8   1    4.40    5.70
   6   8   1   12.90    7.30
  -7  -8  -1    3.40    4.80
  -7  -8  -1   -2.60    4.20
   7   8   1   -7.70    6.20
   7   8   1    1.90    8.60
   7   8   1    0.80    5.80
   7   8   1    1.20    8.60
   7   8   1   10.60    8.60
   7   8   1    3.60    5.00
   7   8   1    9.60    6.10
  -8  -8  -1    0.30    4.70
   8   8   1   17.90    9.10
   8   8   1   -3.30    6.00
   8   8   1    2.30    8.60
   8   8   1    0.70    6.70
   8   8   1  -12.10    6.50
  -9  -8  -1    8.00    8.50
   9   8   1    3.20    9.40
   9   8   1    8.60    7.60
   9   8   1   12.10    7.40
   9   8   1   -5.70    9.30
  10   8   1  -14.20    7.70
  10   8   1   27.20   11.00
  10   8   1   23.00    8.80
  10   8   1   -2.40    9.80
  14  -9  -1   10.30    8.90
 -14   9   1   -4.40    9.40
 -14   9   1    6.70   10.10
 -14   9   1    4.30    8.90
  13  -9  -1    9.90    8.50
 -13   9   1   36.50   11.00
 -13   9   1   23.20   10.30
 -13   9   1   12.70    8.90
  12  -9  -1   33.90    9.10
 -12   9   1   31.10    9.00
 -12   9   1   47.40   10.30
 -12   9   1   36.30    9.90
  11  -9  -1    4.10    6.80
 -11   9   1   -5.80    7.20
 -11   9   1   -8.90    7.20
 -11   9   1    6.60    7.50
  10  -9  -1   25.60    7.30
  10  -9  -1   31.70    6.80
 -10   9   1   42.30    9.10
 -10   9   1   45.40    9.70
 -10   9   1   40.20    8.70
 -10   9   1   38.80    8.30
   9  -9  -1   23.60    6.20
   9  -9  -1   12.50    6.20
  -9   9   1   20.90    7.10
  -9   9   1   21.60    7.20
  -9   9   1   24.90    7.80
  -9   9   1   41.50    8.30
  -9   9   1   16.20    7.30
   8  -9  -1   18.30    5.90
   8  -9  -1   13.20    5.90
   8  -9  -1   15.00    5.30
  -8   9   1   19.80    6.60
  -8   9   1   22.30    6.80
  -8   9   1   41.10    8.00
  -8   9   1   16.70    6.10
  -8   9   1   23.70    6.70
   7  -9  -1   44.30    6.30
   7  -9  -1   46.80    7.00
   7  -9  -1   46.60    6.50
  -7   9   1   48.00    9.40
  -7   9   1   42.90    7.40
  -7   9   1   42.00    7.40
  -7   9   1   43.10    7.20
  -7   9   1   43.40    7.30
  -7   9   1   42.90    7.10
   6  -9  -1   57.79    6.30
   6  -9  -1   52.69    6.70
   6  -9  -1   44.00    6.30
   6  -9  -1   34.50    5.50
  -6   9   1   47.50    6.80
  -6   9   1   44.60    6.80
  -6   9   1   46.80    7.00
  -6   9   1   48.10    7.40
  -6   9   1   52.89    7.40
   5  -9  -1   57.49    6.40
   5  -9  -1   48.10    6.20
   5  -9  -1   68.09    6.60
   5  -9  -1   49.90    5.50
  -5   9   1   77.59    7.70
  -5   9   1   50.39    7.10
  -5   9   1   59.29    7.20
  -5   9   1   53.39    7.10
  -5   9   1   79.19    7.60
   4  -9  -1   45.90    5.20
   4  -9  -1   46.60    5.10
   4  -9  -1   45.90    4.90
   4  -9  -1   42.50    4.70
   4  -9  -1   39.90    5.20
  -4   9   1   40.80    6.00
  -4   9   1   40.70    3.70
  -4   9   1   41.60    5.90
  -4   9   1   44.30    5.40
  -4   9   1   36.40    5.90
  -4   9   1   46.40    6.00
   3  -9  -1   17.10    3.80
   3  -9  -1   14.40    3.60
   3  -9  -1   15.10    3.30
   3  -9  -1   26.20    3.50
  -3   9   1   20.40    4.90
  -3   9   1   12.20    4.20
  -3   9   1   13.90    4.40
  -3   9   1   13.90    2.90
  -3   9   1   17.50    4.60
  -3   9   1   18.50    3.50
   2  -9  -1    8.60    2.70
   2  -9  -1    9.10    3.10
   2  -9  -1    4.60    3.20
   2  -9  -1    6.60    2.60
  -2   9   1    9.30    4.10
  -2   9   1    0.50    3.70
  -2   9   1    3.10    2.60
  -2   9   1    7.90    4.00
  -2   9   1    3.60    3.00
  -2   9   1    1.20    6.80
  -2   9   1    9.30    4.10
   1  -9  -1   72.49    5.20
   1  -9  -1   62.89    5.70
   1  -9  -1   71.89    6.00
   1  -9  -1   74.09    7.80
   1  -9  -1   75.49    5.20
  -1   9   1   77.29    7.50
  -1   9   1   77.99    9.80
  -1   9   1   56.69    5.80
  -1   9   1   84.09    7.90
  -1   9   1   67.09    6.50
  -1   9   1   79.09    7.40
  -1   9   1   70.99    7.10
   0  -9  -1    9.30    4.20
   0  -9  -1    2.60    2.80
   0  -9  -1   -0.80    2.00
   0  -9  -1   -2.60    2.10
   0  -9  -1   -0.90    2.00
   0   9   1   -2.40    2.80
   0   9   1    1.50    3.80
   0   9   1   -1.20    3.50
   0   9   1   -3.50    6.50
   0   9   1   -0.50    3.60
   0   9   1   -4.50    3.50
   0   9   1   -6.70    3.30
  -1  -9  -1   34.10    3.40
  -1  -9  -1   32.50    5.60
  -1  -9  -1   38.30    3.50
  -1  -9  -1   35.00    4.00
  -1  -9  -1   35.00    4.20
   1   9   1   36.60    5.70
   1   9   1   30.90    4.70
   1   9   1   31.90    4.30
   1   9   1   28.50    4.90
   1   9   1   15.80    5.30
   1   9   1   20.60    8.20
   1   9   1   41.20    5.40
  -2  -9  -1  133.49    8.30
  -2  -9  -1  136.69    7.50
  -2  -9  -1  116.39   11.30
  -2  -9  -1  131.69    8.50
   2   9   1  121.09   10.00
   2   9   1  136.79    8.20
   2   9   1  117.89   11.80
   2   9   1  118.69    9.70
   2   9   1  126.59   10.00
   2   9   1  137.99    9.80
   2   9   1  146.69   14.10
  -3  -9  -1   36.30    4.60
  -3  -9  -1   28.00    4.30
  -3  -9  -1   28.10    6.60
  -3  -9  -1   29.40    3.80
   3   9   1   36.00    5.60
   3   9   1   32.40    6.00
   3   9   1   25.70    5.80
   3   9   1   27.40    7.60
   3   9   1   29.40    5.80
   3   9   1   24.70    8.30
   3   9   1   23.20    4.40
  -4  -9  -1  120.89    7.70
  -4  -9  -1  119.89    8.50
  -4  -9  -1   96.89    8.40
  -4  -9  -1  118.09   12.00
   4   9   1  105.99   10.50
   4   9   1   98.69    8.80
   4   9   1  112.19   11.10
   4   9   1  107.49    9.90
   4   9   1  108.89   12.80
   4   9   1   76.59   10.80
   4   9   1   84.29   12.40
  -5  -9  -1   47.60    5.60
  -5  -9  -1   32.30    8.50
  -5  -9  -1   34.10    5.40
   5   9   1   55.39    7.30
   5   9   1   37.80    9.00
   5   9   1   31.20    6.90
   5   9   1   54.99    6.70
   5   9   1   42.80    7.10
   5   9   1   46.80    8.80
   5   9   1   42.40    7.30
   5   9   1   27.00    9.90
  -6  -9  -1    4.60    4.10
  -6  -9  -1    2.10    4.50
   6   9   1   -2.50    5.60
   6   9   1   -1.40    8.30
   6   9   1    2.50    5.10
   6   9   1    6.30    5.70
   6   9   1    4.60    5.70
   6   9   1    3.50    8.70
   6   9   1    4.70    7.60
  -7  -9  -1   61.99    7.40
   7   9   1   57.19   11.50
   7   9   1   80.79    9.70
   7   9   1   73.09    9.80
   7   9   1   64.89   11.70
   7   9   1   58.59   10.70
   8   9   1   43.30   11.40
   8   9   1   27.20   10.60
   8   9   1   21.80   11.00
   8   9   1   21.00    8.00
   8   9   1   22.90    7.50
   9   9   1    3.40    9.50
   9   9   1  -14.80    9.30
   9   9   1    1.20    7.40
   9   9   1    1.00    8.00
  13 -10  -1   10.90    8.10
 -13  10   1   -7.20    8.60
 -13  10   1    9.40    9.40
 -13  10   1    0.00    8.80
  12 -10  -1   -4.60    7.20
 -12  10   1    4.60    8.80
 -12  10   1   13.20    9.10
 -12  10   1    7.70    8.90
  11 -10  -1  117.89   12.20
 -11  10   1  157.68   15.70
 -11  10   1  114.39   13.30
 -11  10   1  137.19   13.50
  10 -10  -1   10.20    5.20
  10 -10  -1   -2.50    5.70
 -10  10   1   14.80    7.70
 -10  10   1   -2.70    6.40
 -10  10   1   -6.90    6.70
 -10  10   1    2.50    7.50
   9 -10  -1   13.70    5.90
   9 -10  -1    8.10    5.30
  -9  10   1   17.70    8.80
  -9  10   1   28.90    7.30
  -9  10   1   15.10    7.60
  -9  10   1   19.40    7.40
  -9  10   1   20.90    7.60
   8 -10  -1   48.80    6.80
   8 -10  -1   25.90    6.40
   8 -10  -1   51.09    7.40
  -8  10   1   54.09    8.60
  -8  10   1   36.50    7.90
  -8  10   1   49.70    8.30
  -8  10   1   44.60    7.80
  -8  10   1   35.70    7.60
   7 -10  -1   34.30    6.40
   7 -10  -1   13.40    5.30
   7 -10  -1   19.70    5.10
  -7  10   1   28.20    6.90
  -7  10   1   28.80    6.40
  -7  10   1   39.40    7.00
  -7  10   1   16.00    6.30
  -7  10   1   28.70    7.00
   6 -10  -1  181.48   12.50
   6 -10  -1  194.78   11.70
   6 -10  -1  156.68   11.70
  -6  10   1  177.98   13.00
  -6  10   1  174.78   13.20
  -6  10   1  211.48   13.30
  -6  10   1  181.08   13.50
  -6  10   1  182.88   13.80
   5 -10  -1   51.79    5.90
   5 -10  -1   35.50    5.50
   5 -10  -1   61.59    6.60
   5 -10  -1   56.49    5.70
  -5  10   1   53.19    7.00
  -5  10   1   46.80    7.00
  -5  10   1   59.09    7.10
  -5  10   1   48.20    5.90
  -5  10   1   47.30    7.00
   4 -10  -1  276.67   14.20
   4 -10  -1  275.37   14.50
   4 -10  -1  263.87   13.70
  -4  10   1  280.37   15.80
  -4  10   1  263.97   15.30
  -4  10   1  265.27   15.60
  -4  10   1  260.97   15.90
  -4  10   1  269.67   12.70
  -4  10   1  271.87   14.50
   3 -10  -1   48.00    5.20
   3 -10  -1   58.39    5.40
   3 -10  -1   53.69    5.20
  -3  10   1   45.40    6.30
  -3  10   1   50.19    4.90
  -3  10   1   55.39    5.50
  -3  10   1   50.39   10.10
  -3  10   1   61.09    6.90
  -3  10   1   62.09    6.40
  -3  10   1   55.39    6.50
   2 -10  -1   10.00    3.30
   2 -10  -1   12.10    3.10
   2 -10  -1   17.10    2.80
  -2  10   1   12.00    3.10
  -2  10   1    9.50    4.30
  -2  10   1   16.10    4.70
  -2  10   1   10.60    7.30
  -2  10   1   14.90    4.50
  -2  10   1   10.90    4.30
  -2  10   1    7.00    3.60
   1 -10  -1   87.89    5.20
   1 -10  -1   79.19    8.30
   1 -10  -1   82.89    6.40
  -1  10   1   81.39   10.90
  -1  10   1   80.49    7.30
  -1  10   1   85.79    8.20
  -1  10   1   95.69    8.70
  -1  10   1   79.59    6.50
  -1  10   1   73.49    7.70
  -1  10   1   62.49    6.90
   0 -10  -1   73.79    7.90
   0 -10  -1   79.99    6.30
   0 -10  -1   81.99    4.70
   0  10   1   82.09    8.50
   0  10   1   64.19    6.90
   0  10   1   70.19    6.90
   0  10   1   54.99    9.90
   0  10   1   79.09    7.80
   0  10   1   72.79    6.90
   0  10   1   77.09    6.40
  -1 -10  -1   14.10    5.60
  -1 -10  -1   21.70    2.50
  -1 -10  -1   21.50    3.80
   1  10   1   21.50    4.00
   1  10   1   24.30    5.20
   1  10   1   19.10    5.00
   1  10   1   23.60    5.20
   1  10   1    7.80    8.20
   1  10   1   27.10    6.60
   1  10   1   19.00    4.90
   1  10   1   26.30    4.50
  -2 -10  -1    1.90    5.30
  -2 -10  -1    7.00    3.40
  -2 -10  -1    7.30    2.30
   2  10   1    8.90    4.30
   2  10   1   11.70    8.30
   2  10   1    6.10    4.60
   2  10   1    8.60    4.80
   2  10   1   16.60    5.10
   2  10   1    9.20    6.20
   2  10   1   10.10    3.40
  -3 -10  -1  511.25   22.20
  -3 -10  -1  451.45   26.90
  -3 -10  -1  524.65   23.40
  -3 -10  -1  481.85   23.20
   3  10   1  492.85   27.90
   3  10   1  480.45   24.80
   3  10   1  480.95   28.80
   3  10   1  506.45   24.90
   3  10   1  524.45   24.80
   3  10   1  516.25   21.90
   3  10   1  500.85   23.60
   3  10   1  494.05   25.00
  -4 -10  -1    3.00    3.00
  -4 -10  -1    6.10    3.80
  -4 -10  -1    3.60    5.70
   4  10   1   -8.10    4.90
   4  10   1    9.50    6.80
   4  10   1    6.30    9.00
   4  10   1   -2.10    5.10
   4  10   1    3.80    5.10
   4  10   1    1.40    6.80
   4  10   1    8.80    8.20
   4  10   1    0.50    4.20
  -5 -10  -1   10.50    3.40
  -5 -10  -1    2.90    3.80
   5  10   1   18.90    7.90
   5  10   1    5.30    5.70
   5  10   1    3.40    7.90
   5  10   1    6.20    5.60
   5  10   1   -2.30    5.60
   5  10   1   13.50    9.20
  -6 -10  -1   13.20    3.60
   6  10   1    6.50    7.60
   6  10   1   10.00    8.70
   6  10   1   -7.80    5.90
   6  10   1    7.50    8.60
   6  10   1   10.10    6.50
   7  10   1   -7.70    8.70
   7  10   1   -2.70    9.50
   7  10   1   -3.40    6.10
   7  10   1    4.70    6.70
   7  10   1  -10.80    8.00
   8  10   1    2.40    7.60
   8  10   1    7.20    7.00
   8  10   1    5.30    9.80
   8  10   1    5.60   10.80
  13 -11  -1   64.59   11.30
 -13  11   1   87.49   13.70
 -13  11   1   77.19   13.00
 -13  11   1   95.39   14.10
  12 -11  -1   16.50    7.60
 -12  11   1   13.80    9.20
 -12  11   1   40.20   10.70
 -12  11   1   18.70   10.10
  11 -11  -1   35.40    8.20
 -11  11   1   57.09   10.40
 -11  11   1   44.90   10.00
 -11  11   1   37.10    9.80
  10 -11  -1    4.50    6.00
 -10  11   1    0.80    7.20
 -10  11   1    1.70    7.60
 -10  11   1   -1.80    7.20
   9 -11  -1    1.10    5.20
   9 -11  -1   17.70    5.50
  -9  11   1   19.30    7.80
  -9  11   1   29.80    7.60
  -9  11   1    0.90    6.90
   8 -11  -1   -9.50    4.30
   8 -11  -1   11.80    5.80
   8 -11  -1   -4.10    4.40
  -8  11   1   -4.40    6.20
  -8  11   1    5.50    6.20
  -8  11   1   -1.50    6.40
  -8  11   1   -5.50    6.00
  -8  11   1   -2.60    5.60
   7 -11  -1   -2.20    4.30
   7 -11  -1   -4.40    3.70
   7 -11  -1    9.40    5.20
  -7  11   1   -0.40    5.30
  -7  11   1   -0.70    5.90
  -7  11   1    4.70    6.10
  -7  11   1   -1.80    5.60
  -7  11   1    0.30    5.30
   6 -11  -1  114.99    9.90
   6 -11  -1  112.69    8.80
   6 -11  -1  112.89    9.60
  -6  11   1   91.69    9.70
  -6  11   1  127.99   11.10
  -6  11   1  112.09   10.50
  -6  11   1  116.79   10.60
  -6  11   1  123.29   11.10
   5 -11  -1  113.89    9.30
   5 -11  -1  128.89    8.50
   5 -11  -1  122.09   10.30
  -5  11   1  127.59   11.50
  -5  11   1  120.79    9.60
  -5  11   1  126.19   10.40
  -5  11   1  101.39   10.00
  -5  11   1  112.99   11.00
   4 -11  -1   82.69    7.10
   4 -11  -1   81.79    7.40
   4 -11  -1   88.49    6.50
  -4  11   1   70.89    7.80
  -4  11   1   70.09    7.80
  -4  11   1   73.09    7.80
  -4  11   1   64.89    6.00
  -4  11   1   73.09    6.90
  -4  11   1   83.49    8.60
   3 -11  -1    6.00    3.10
   3 -11  -1   13.90    3.30
   3 -11  -1    8.70    2.70
  -3  11   1   16.90    5.00
  -3  11   1   -0.30    7.90
  -3  11   1    6.00    4.90
  -3  11   1    9.10    3.40
  -3  11   1    3.50    3.30
  -3  11   1    1.90    4.40
  -3  11   1    7.30    4.80
   2 -11  -1   75.79    6.50
   2 -11  -1   82.39    4.70
  -2  11   1   70.19    7.60
  -2  11   1   57.99   10.20
  -2  11   1   87.69    7.90
  -2  11   1   79.59    7.60
  -2  11   1   65.79    6.50
  -2  11   1   77.29    7.40
  -2  11   1   81.29    8.10
   1 -11  -1   96.39    6.80
   1 -11  -1   80.09    6.40
  -1  11   1   96.09    9.00
  -1  11   1   75.69    7.60
  -1  11   1   88.59    7.00
  -1  11   1   74.39   11.40
  -1  11   1   90.79    8.50
  -1  11   1  103.59    9.00
  -1  11   1   91.09    9.40
   0 -11  -1   19.50    3.40
   0 -11  -1   19.60    3.20
   0 -11  -1   15.40    5.40
   0  11   1    7.70    4.90
   0  11   1   22.10    5.00
   0  11   1   19.40    4.90
   0  11   1   16.00    8.80
   0  11   1   22.50    5.20
   0  11   1   13.90    3.80
   0  11   1   18.30    4.90
  -1 -11  -1   13.80    6.00
  -1 -11  -1   18.90    3.30
  -1 -11  -1   13.70    3.50
   1  11   1   13.60    5.30
   1  11   1   23.60    9.80
   1  11   1   13.10    4.50
   1  11   1   12.50    4.70
   1  11   1   17.90    4.10
   1  11   1   23.60    5.50
   1  11   1   21.40    5.30
   1  11   1    6.70    5.80
  -2 -11  -1   76.79    6.50
  -2 -11  -1   74.29    6.70
  -2 -11  -1   87.49   10.10
   2  11   1   88.79    7.00
   2  11   1   80.19    9.20
   2  11   1   90.49    7.20
   2  11   1   79.99   12.10
   2  11   1   78.29    8.20
   2  11   1  108.29    9.70
   2  11   1   84.59    8.80
   2  11   1   82.69    7.50
   2  11   1   64.49    9.60
  -3 -11  -1   19.00    6.90
  -3 -11  -1   14.90    3.80
  -3 -11  -1   14.80    2.90
   3  11   1   13.60    8.70
   3  11   1   20.40    6.10
   3  11   1   23.90    4.10
   3  11   1   15.60    7.30
   3  11   1   22.30    6.10
   3  11   1   20.40    6.00
   4  11   1   -1.50    5.30
   4  11   1    6.20    5.40
   4  11   1   -8.40    4.80
   4  11   1    8.20    8.30
   4  11   1    0.00    6.80
   4  11   1    7.80    9.40
   5  11   1   -2.10    8.00
   5  11   1    2.60    6.10
   5  11   1   -0.80    6.00
   5  11   1   -2.50    9.10
   5  11   1  -10.70    7.10
   6  11   1   -3.80    9.20
   6  11   1    4.10    6.70
   6  11   1   10.40    9.90
   6  11   1   -8.20    8.30
   6  11   1   -2.30    6.00
   7  11   1    1.70    9.50
   7  11   1   15.60   11.60
   7  11   1   24.20    7.70
   7  11   1    9.70    7.10
 -12  12   1   -5.80    8.10
 -12  12   1    6.80    9.30
 -12  12   1    2.00    9.20
  11 -12  -1    5.70    7.40
 -11  12   1  -16.50    7.80
 -11  12   1   -0.40    7.90
 -11  12   1   -6.40    8.10
  10 -12  -1    0.20    5.50
 -10  12   1    3.40    7.90
 -10  12   1   10.60    8.20
 -10  12   1   -1.40    7.20
   9 -12  -1   11.40    5.70
  -9  12   1    2.40    6.90
  -9  12   1    8.20    7.50
  -9  12   1    9.20    7.40
   8 -12  -1   64.49    9.50
   8 -12  -1   42.30    6.80
   8 -12  -1   43.10    7.20
  -8  12   1   56.09    9.00
  -8  12   1   45.50    8.80
  -8  12   1   55.79    9.30
   7 -12  -1    9.60    5.00
   7 -12  -1    9.20    5.50
   7 -12  -1   11.90    4.30
  -7  12   1   14.10    7.00
  -7  12   1   20.70    6.30
  -7  12   1   15.80    6.50
   6 -12  -1    7.90    4.20
   6 -12  -1    6.70    3.90
  -6  12   1   14.70    6.30
  -6  12   1   18.50    5.50
  -6  12   1   23.80    6.40
  -6  12   1   11.60    6.00
   5 -12  -1   26.40    4.80
   5 -12  -1   45.10    4.90
  -5  12   1   54.29    7.40
  -5  12   1   52.29    6.30
  -5  12   1   40.90    7.00
  -5  12   1   46.90   10.30
  -5  12   1   32.70    6.80
   4 -12  -1  184.78    9.40
   4 -12  -1  193.48   11.10
   4 -12  -1  180.58   10.50
  -4  12   1  176.48   10.20
  -4  12   1  180.18   18.10
  -4  12   1  173.38   11.20
  -4  12   1  176.28   13.20
  -4  12   1  162.98   12.20
  -4  12   1  170.08   12.80
  -4  12   1  176.38   12.70
   3 -12  -1   10.20    2.30
   3 -12  -1   15.10    3.60
  -3  12   1   18.10    4.10
  -3  12   1   16.30    5.70
  -3  12   1   15.20    5.40
  -3  12   1   17.40    5.30
  -3  12   1   20.60    5.70
  -3  12   1   20.80    9.50
  -3  12   1   21.50    4.20
   2 -12  -1  317.37   15.30
   2 -12  -1  315.67   15.00
  -2  12   1  294.07   17.30
  -2  12   1  336.97   15.90
  -2  12   1  321.37   17.40
  -2  12   1  310.47   17.70
  -2  12   1  310.87   17.30
  -2  12   1  291.37   17.30
  -2  12   1  302.07   23.00
   1 -12  -1  335.57   15.90
   1 -12  -1  359.76   15.90
  -1  12   1  319.37   23.40
  -1  12   1  330.57   18.40
  -1  12   1  332.27   18.00
  -1  12   1  345.37   19.20
  -1  12   1  324.67   18.20
  -1  12   1  325.47   16.20
   0 -12  -1   13.70    3.00
   0 -12  -1   12.50    3.10
   0  12   1    9.60    5.00
   0  12   1   -1.00    8.90
   0  12   1   11.00    3.80
   0  12   1    9.40    5.70
   0  12   1   19.20    5.10
   0  12   1   12.10    5.20
  -1 -12  -1    9.80    2.90
  -1 -12  -1    5.00    2.60
  -1 -12  -1   16.50    6.00
   1  12   1    6.50    4.90
   1  12   1    4.30    5.00
   1  12   1   -4.00    5.40
   1  12   1    3.50    3.40
   1  12   1    7.00    8.90
   1  12   1    5.30    4.20
   1  12   1    6.00    4.70
  -2 -12  -1  151.98    8.10
  -2 -12  -1  110.59   12.10
   2  12   1  131.09   12.00
   2  12   1  136.29   11.70
   2  12   1  108.69   12.70
   2  12   1  117.59   11.40
   2  12   1  150.78   16.80
  -3 -12  -1   87.29   11.70
   3  12   1   94.59    9.50
   3  12   1  116.39   13.00
   3  12   1  106.79   14.30
   4  12   1   30.40    9.40
   4  12   1   19.90   10.80
   4  12   1    7.60    9.60
   4  12   1   20.50    6.80
   4  12   1   20.60    6.80
   5  12   1    7.30    9.70
   5  12   1   10.70    6.60
   5  12   1   13.60    6.90
   5  12   1   17.90    9.80
   5  12   1    1.40    8.80
   6  12   1    1.20   10.40
   6  12   1   -4.10   10.70
   6  12   1   -3.70    6.00
   6  12   1    5.70    7.00
 -11  13   1   -2.20    8.50
 -11  13   1   10.10    8.70
 -11  13   1    7.00    8.40
 -10  13   1   -8.80    7.40
 -10  13   1   16.40    8.30
 -10  13   1   -0.70    7.60
  -9  13   1   -3.10    7.00
  -9  13   1    4.00    6.50
  -9  13   1   -0.10    7.10
  -8  13   1  144.59   13.90
  -8  13   1  128.49   12.50
  -8  13   1   99.39   12.20
  -7  13   1   15.50    6.30
  -7  13   1   12.60    6.80
  -7  13   1   15.60    6.90
   6 -13  -1   37.40    4.70
   6 -13  -1   48.10    9.10
  -6  13   1   43.20    7.40
  -6  13   1   36.70    7.50
  -6  13   1   51.99    7.10
   5 -13  -1   75.39    7.80
  -5  13   1   85.89    9.30
  -5  13   1   86.59   14.20
  -5  13   1  112.59    9.70
  -5  13   1   79.49    9.10
  -5  13   1   69.79   10.20
  -4  13   1   11.40    5.90
  -4  13   1   19.10    4.40
  -4  13   1    6.70    5.60
  -4  13   1   14.30    5.90
  -4  13   1   14.80    9.80
   3 -13  -1   97.19    8.70
   3 -13  -1  120.29    7.90
  -3  13   1  125.69    8.70
  -3  13   1  129.59   11.30
  -3  13   1  147.69   16.00
  -3  13   1  142.79   11.40
  -3  13   1  117.59    9.70
  -3  13   1  126.69   11.80
   2 -13  -1   -1.30    2.40
  -2  13   1   -0.80    4.70
  -2  13   1   -2.10    4.10
  -2  13   1    5.40    5.00
  -2  13   1   -3.90    4.70
  -2  13   1    2.50    9.30
   1 -13  -1    7.10    2.40
  -1  13   1    8.90    9.60
  -1  13   1   12.50    5.20
  -1  13   1   -0.20    5.00
  -1  13   1    8.10    5.10
  -1  13   1    6.40    5.50
   0  13   1   38.20    7.20
   0  13   1   38.40    6.70
   0  13   1   39.60    6.70
   0  13   1   37.10    6.50
   0  13   1   25.20    7.00
   0  13   1   60.19   12.90
   1  13   1   25.70   11.40
   1  13   1   35.90    6.80
   1  13   1   38.20    7.60
   1  13   1   29.80    8.10
   1  13   1   28.50    6.60
  -2 -13  -1    7.80    6.70
   2  13   1   11.70   10.00
   2  13   1    5.00    7.00
   2  13   1   10.20    5.90
   2  13   1   13.10    6.10
   3  13   1    1.90   10.50
   3  13   1   -0.20    7.60
   4  13   1   25.30    6.80
   4  13   1   25.50    9.60
   4  13   1   28.60    7.50
   4  13   1   12.70   10.70
   4  13   1   43.30   12.50
   5  13   1  130.69   17.40
   5  13   1  102.49   15.30
   5  13   1  116.09   12.00
   5  13   1  105.59   11.00
 -10  14   1   50.69   10.10
 -10  14   1   30.20   10.10
 -10  14   1   56.79   10.80
  -9  14   1   78.79   11.40
  -9  14   1   60.59   10.60
  -9  14   1   81.19   11.20
  -8  14   1   26.90    7.80
  -8  14   1   14.30    7.70
  -8  14   1   13.30    7.70
  -7  14   1   10.20    6.80
  -7  14   1    1.70    6.70
  -6  14   1   11.90    6.70
  -6  14   1   10.60    6.50
  -5  14   1   -3.00    5.50
  -5  14   1   -6.50    5.50
  -5  14   1    5.60   10.50
  -4  14   1  -11.00    8.80
  -4  14   1   -8.50    4.80
  -4  14   1    4.80    5.40
  -3  14   1   15.50   10.40
  -3  14   1   17.80    6.10
  -3  14   1   18.00    6.10
  -2  14   1   25.00    6.10
  -2  14   1   17.40   10.50
  -2  14   1   10.00    6.00
  -1  14   1   10.10    5.60
  -1  14   1   15.50   11.10
  -1  14   1   10.20    5.80
   0  14   1    4.40    5.00
   0  14   1    3.70   10.10
   0  14   1    4.30    5.50
   0  14   1   -1.00    5.30
   1  14   1   27.30    8.10
   1  14   1   19.50    6.20
   1  14   1   17.80   11.70
   1  14   1   25.80    6.60
   2  14   1    4.60   10.60
   2  14   1   -2.20    5.80
   2  14   1   -8.00    6.80
   2  14   1    9.70    6.00
   3  14   1   27.10   12.60
   3  14   1   17.30    9.00
   3  14   1   25.20    7.30
   3  14   1   18.80    6.70
  -8  15   1   66.59   10.10
  -8  15   1   49.80    9.20
  -7  15   1   -0.90    6.20
  -7  15   1   -4.80    6.10
  -6  15   1   22.00    7.40
  -6  15   1   -4.90   10.70
  -6  15   1   17.40    6.90
  -5  15   1   19.50    6.70
  -5  15   1   23.80   11.90
  -5  15   1   32.40    6.90
  -4  15   1   21.80    6.40
  -4  15   1   24.30    6.80
  -4  15   1   24.90   12.10
  -3  15   1   72.59    8.70
  -3  15   1   55.29    8.00
  -3  15   1   64.49   14.30
  -2  15   1  138.69   12.50
  -2  15   1  146.79   13.30
  -2  15   1  175.18   19.40
  -1  15   1    7.20    5.40
  -1  15   1   -2.50    9.80
  -1  15   1    9.00    5.70
   0  15   1   21.20    6.20
   0  15   1   16.40   11.80
   0  15   1   30.20    7.10
  -1  16  -2   10.60   10.30
  -1  16  -2    8.60    4.40
  -2  16  -2   57.09   14.10
  -2  16  -2   40.80    6.00
  -3  16  -2   -1.40    4.20
  -3  16  -2   -4.10    3.80
  -3  16  -2   -5.20    9.70
  -4  16  -2    7.90    5.00
  -4  16  -2    9.70    4.70
  -4  16  -2    5.50   10.60
  -5  16  -2    8.30   11.10
  -5  16  -2    7.20    5.50
  -5  16  -2    1.20    4.60
  -6  16  -2   24.80    6.40
  -6  16  -2   30.40    6.40
   2  15  -2   17.90    5.30
   2  15  -2   16.50   11.10
   2  15  -2   26.40   11.30
   2  15  -2    1.70    7.10
   1  15  -2   16.30    4.50
   1  15  -2    7.80    5.20
   1  15  -2   17.20   10.90
   1  15  -2    3.30    6.50
   0  15  -2   21.90   10.50
   0  15  -2   10.90    4.40
   0  15  -2    9.00    6.20
   0  15  -2   10.50    4.30
  -1  15  -2    3.30    3.60
  -1  15  -2    3.90    3.90
  -1  15  -2    4.70    4.00
  -1  15  -2   16.40   10.50
  -2  15  -2   56.69    6.30
  -2  15  -2   57.09    6.30
  -2  15  -2   61.69    5.90
  -2  15  -2   72.49   13.50
  -3  15  -2   44.30    5.70
  -3  15  -2   65.49   13.20
  -3  15  -2   58.69   12.00
  -3  15  -2   62.19    6.60
  -3  15  -2   39.30    5.90
  -4  15  -2   15.20    5.10
  -4  15  -2   18.30   11.20
  -4  15  -2   30.00    6.60
  -4  15  -2   20.10    5.60
  -4  15  -2   24.30    5.20
  -5  15  -2    0.00    5.00
  -5  15  -2    5.70    5.00
  -5  15  -2    7.80    5.60
  -6  15  -2   20.70    6.90
  -6  15  -2   28.30    6.20
  -6  15  -2   29.70    7.10
  -7  15  -2    5.80    6.00
  -7  15  -2   20.50    6.70
  -7  15  -2    4.90    6.00
  -8  15  -2   32.30    7.70
  -8  15  -2   34.20    8.70
  -8  15  -2   31.80    7.70
  -9  15  -2   15.80    8.00
  -9  15  -2    4.50    7.10
  -9  15  -2    4.20    7.70
   4  14  -2   -5.00    9.40
   4  14  -2    3.00    4.90
   4  14  -2    5.10    8.70
   4  14  -2   -0.10    4.80
   4  14  -2    3.80    9.90
   3  14  -2   11.30   10.20
   3  14  -2   14.30   10.10
   3  14  -2    3.10    7.20
   3  14  -2    7.10    4.40
   3  14  -2    8.00    5.00
   2  14  -2    0.80    6.40
   2  14  -2    2.40    4.50
   2  14  -2    1.30    3.80
   2  14  -2    3.10    4.00
   2  14  -2    4.10    9.90
   2  14  -2    9.60    9.10
   1  14  -2   -0.60    3.70
   1  14  -2    2.50    7.60
   1  14  -2    4.30    3.70
   1  14  -2   -7.20    8.70
   1  14  -2    4.10    6.20
   0  14  -2    3.90    5.60
   0  14  -2    1.00    8.60
   0  14  -2   14.50    5.80
   0  14  -2    7.10    5.20
   0  14  -2   11.00    4.10
   0  14  -2    8.60    3.80
   0  14  -2    6.20    3.50
  -1  14  -2   17.30    4.30
  -1  14  -2   13.60    5.60
  -1  14  -2   18.50    6.30
  -1  14  -2   10.40    3.70
  -1  14  -2   14.70    4.50
  -1  14  -2   30.80    6.10
  -1  14  -2   30.10   10.60
  -2  14  -2   15.80    5.70
  -2  14  -2   18.50    9.70
  -2  14  -2   14.60    4.00
  -2  14  -2   18.40    4.40
  -2  14  -2   13.30    4.20
  -2  14  -2   15.50    5.40
  -3  14  -2    8.50    9.00
  -3  14  -2    9.90    4.50
  -3  14  -2   15.00    4.40
  -3  14  -2   16.20    4.70
  -3  14  -2   12.10    5.20
  -3  14  -2   16.10    5.00
  -4  14  -2   13.20    4.80
  -4  14  -2   -6.30    4.00
  -4  14  -2    5.30    4.50
  -4  14  -2   12.40    5.50
  -5  14  -2   -5.20    5.00
  -5  14  -2   13.60    5.00
  -5  14  -2    5.80    5.30
  -5  14  -2    3.00    5.00
  -6  14  -2    8.30    5.40
  -6  14  -2    0.20    5.90
  -6  14  -2   10.90    6.00
  -6  14  -2    3.10    5.30
  -7  14  -2   85.29    9.80
  -7  14  -2  104.69   11.50
  -7  14  -2  109.29   10.30
  -8  14  -2   79.99   10.00
  -8  14  -2   76.69   11.40
  -8  14  -2   84.29    9.70
  -9  14  -2   20.40    8.00
  -9  14  -2   14.20    7.50
  -9  14  -2    8.80    7.30
 -10  14  -2    6.50    7.60
 -10  14  -2    8.00    8.70
 -10  14  -2   -0.50    8.00
 -11  14  -2   -9.20    7.30
 -11  14  -2    4.60    8.40
 -11  14  -2   14.10    8.90
   6  13  -2    0.50    5.50
   6  13  -2   28.10   11.70
   6  13  -2   24.50   11.00
   6  13  -2    9.30    6.70
   5  13  -2   21.90   11.90
   5  13  -2   22.90   10.20
   5  13  -2   43.50    7.30
   5  13  -2   20.30    6.20
   5  13  -2   16.90   11.30
   4  13  -2   -2.40    7.10
   4  13  -2    5.40    5.20
   4  13  -2   16.80    9.00
   4  13  -2   -5.80    8.10
   4  13  -2   -3.10    4.40
   3  13  -2    5.70    4.50
   3  13  -2   -2.40    9.10
   3  13  -2   -1.10    6.30
   3  13  -2    2.20    4.30
   3  13  -2   10.50    8.80
   3  13  -2    2.90    4.70
   2  13  -2   10.70    6.80
   2  13  -2   11.20    4.70
   2  13  -2   18.30    5.80
   2  13  -2   20.20    7.10
   2  13  -2   12.00    8.90
   2  13  -2   14.70    4.50
   2  13  -2   20.30    4.90
   1  13  -2   82.59    8.60
   1  13  -2   67.89   10.30
   1  13  -2   80.89    7.10
   1  13  -2   74.29    7.60
   1  13  -2   74.89    8.50
   1  13  -2  100.99   13.30
   0  13  -2   12.70    5.30
   0  13  -2   20.40    4.60
   0  13  -2   11.80    3.90
   0  13  -2   24.40    3.90
   0  13  -2   17.60    8.70
   0  13  -2   17.40    6.60
   0  13  -2   25.00    5.90
  -1  13  -2   20.30    5.90
  -1  13  -2   22.00    4.20
  -1  13  -2   11.90    5.20
  -1  13  -2   18.70    5.80
  -1  13  -2   10.60    8.60
  -1  13  -2   20.80    3.80
  -1  13  -2   18.60    4.50
  -2  13  -2    0.30    8.40
  -2  13  -2    4.20    3.80
  -2  13  -2    7.20    5.00
  -2  13  -2    5.70    3.50
  -2  13  -2   17.30    5.50
  -2  13  -2   13.50    4.00
  -3  13  -2   40.50    6.40
  -3  13  -2   35.60    6.90
  -3  13  -2   25.40    4.50
  -3  13  -2   27.90    4.80
  -3  13  -2   22.20    9.70
  -3  13  -2   20.00    4.60
  -4  13  -2  100.49    8.80
  -4  13  -2   90.89    9.30
  -4  13  -2  116.99    9.50
  -4  13  -2   98.59    9.70
  -4  13  -2   85.59    8.10
  -5  13  -2   -2.20    4.80
  -5  13  -2    4.60    4.90
  -5  13  -2   -1.30    4.30
  -5  13  -2    6.00    4.90
  -5  13  -2   10.10    3.80
  -6  13  -2   26.70    7.50
  -6  13  -2   25.30    6.30
  -6  13  -2   23.70    5.90
  -6  13  -2   17.90    6.00
   6 -13   2   16.90    3.30
   6 -13   2   18.50    3.60
  -7  13  -2  170.68   14.40
  -7  13  -2  135.09   12.90
  -7  13  -2  147.29   13.20
  -7  13  -2  157.58   12.90
  -8  13  -2   96.79   11.00
  -8  13  -2   66.09    9.20
  -8  13  -2   70.69    9.10
  -9  13  -2   22.00    7.40
  -9  13  -2   41.00    9.30
  -9  13  -2   14.90    7.70
 -10  13  -2   43.90    9.00
 -10  13  -2   42.50   10.40
 -10  13  -2   24.90    8.60
 -11  13  -2   -2.10    8.50
 -11  13  -2    8.60    7.80
 -11  13  -2   24.80    8.50
 -12  13  -2   43.90   11.70
 -12  13  -2    9.20    8.90
 -12  13  -2   29.00   10.20
   7  12  -2   16.70    6.70
   7  12  -2    6.80    7.10
   7  12  -2   13.60   10.20
   7  12  -2    4.70   11.30
   6  12  -2    3.80   10.60
   6  12  -2   -4.90    5.20
   6  12  -2    7.40    9.10
   6  12  -2    5.80    5.80
   6  12  -2  -12.60    8.80
   5  12  -2    4.70    9.00
   5  12  -2  -12.90    7.50
   5  12  -2    1.70    4.90
   5  12  -2    5.40    9.10
   5  12  -2   -0.10    5.20
   4  12  -2   71.99    7.90
   4  12  -2   59.29   12.20
   4  12  -2   87.69   12.60
   4  12  -2   65.59   10.80
   4  12  -2   63.09    7.60
   4  12  -2   76.69    7.60
   3  12  -2  151.18   10.20
   3  12  -2  121.69   14.90
   3  12  -2  125.69   10.20
   3  12  -2  122.69   10.00
   3  12  -2  127.69   10.00
   3  12  -2  116.49   13.30
   3  12  -2  144.09   14.80
   2  12  -2    9.60    4.10
   2  12  -2   -1.10    5.90
   2  12  -2    5.90    4.20
   2  12  -2    4.70    3.70
   2  12  -2    9.00    8.10
   2  12  -2   15.30    4.90
   1  12  -2    5.60    3.00
   1  12  -2   17.40    6.60
   1  12  -2    4.90    3.60
   1  12  -2   11.60    5.10
   1  12  -2    8.60    3.60
   1  12  -2    8.40    4.80
   1  12  -2   16.30    8.20
   0  12  -2   41.00    6.50
   0  12  -2   42.30    4.60
   0  12  -2   40.10    7.40
   0  12  -2   33.10    4.50
   0  12  -2   40.80    4.20
   0  12  -2   30.50    8.90
   0  12  -2   41.30    4.80
   0  12  -2   40.10    6.50
  -1  12  -2  184.18    9.80
  -1  12  -2  181.08   10.30
  -1  12  -2  147.59   15.80
  -1  12  -2  185.78   13.30
  -1  12  -2  168.48    9.70
  -1  12  -2  162.08   12.20
  -1  12  -2  167.08   10.10
  -2  12  -2   64.59    6.30
  -2  12  -2   54.49    7.10
  -2  12  -2   69.49    6.60
  -2  12  -2   58.19    5.30
  -2  12  -2   57.59    5.60
  -2  12  -2   73.39    7.70
  -2  12  -2   65.79   11.20
  -3  12  -2   24.00    5.60
  -3  12  -2   14.80    4.40
  -3  12  -2   25.50    4.50
  -3  12  -2   35.20    5.70
  -3  12  -2   25.60    4.50
  -3  12  -2   20.70    4.10
  -4  12  -2    2.20    4.00
  -4  12  -2    7.90    5.00
  -4  12  -2    4.10    3.90
  -4  12  -2    3.90    4.10
  -4  12  -2    2.10    3.60
  -4  12  -2   -2.70    3.80
  -5  12  -2   14.80    5.60
  -5  12  -2   13.90    5.00
  -5  12  -2   19.10    4.30
  -5  12  -2   10.90    4.80
  -5  12  -2   18.10    5.00
  -5  12  -2   19.80    5.10
   5 -12   2   16.70    3.20
   5 -12   2   17.60    3.00
  -6  12  -2  347.97   20.80
  -6  12  -2  358.96   16.70
  -6  12  -2  299.47   18.90
  -6  12  -2  350.96   19.30
  -6  12  -2  389.86   19.50
  -6  12  -2  353.96   19.70
   6 -12   2  381.56   17.60
  -7  12  -2  415.46   22.00
  -7  12  -2  400.46   22.20
  -7  12  -2  428.36   23.60
  -7  12  -2  409.86   22.10
   7 -12   2  382.16   20.00
   7 -12   2  416.96   19.30
  -8  12  -2   -3.20    6.00
  -8  12  -2    4.50    5.70
  -8  12  -2    1.00    6.40
  -8  12  -2   12.00    6.50
   8 -12   2   -5.70    3.90
   8 -12   2   -8.90    3.40
  -9  12  -2   26.50    7.70
  -9  12  -2   49.60    9.50
  -9  12  -2   32.80    7.60
   9 -12   2   33.80    6.00
   9 -12   2   40.10    6.20
 -10  12  -2   55.09   10.00
 -10  12  -2   81.89   10.80
 -10  12  -2   78.89   11.70
  10 -12   2   45.60    7.50
 -11  12  -2    3.70    7.90
 -11  12  -2    2.00    8.50
 -11  12  -2    3.90    7.40
 -12  12  -2    9.70    8.70
 -12  12  -2   36.00   11.00
 -12  12  -2   26.00    9.40
   8  11  -2    7.50    7.00
   8  11  -2    4.50    9.70
   8  11  -2   -0.70    6.40
   8  11  -2    0.10    9.60
   7  11  -2    2.70    8.30
   7  11  -2    0.50    5.90
   7  11  -2    0.10    9.20
   7  11  -2   -6.60    5.60
   6  11  -2   -3.60    8.80
   6  11  -2    7.20    5.40
   6  11  -2    8.70    5.80
   6  11  -2   17.50   10.20
   6  11  -2    2.30    8.30
   5  11  -2   11.50    8.50
   5  11  -2    8.00    4.90
   5  11  -2   16.60    5.70
   5  11  -2  -13.70    7.40
   5  11  -2    6.40    5.10
   5  11  -2    3.30    7.20
  -5 -11   2    5.80    2.20
   4  11  -2   81.79    7.80
   4  11  -2   97.09   12.50
   4  11  -2   64.09   11.10
   4  11  -2   96.79   12.70
   4  11  -2   91.69    8.30
   4  11  -2  109.89    8.40
   4  11  -2   88.99    8.20
   3  11  -2    4.00    3.70
   3  11  -2   -1.40    5.90
   3  11  -2   -1.50    3.40
   3  11  -2   -4.20    4.00
   3  11  -2    2.20    3.90
   3  11  -2   -4.40    7.20
   3  11  -2    0.50    6.70
   3  11  -2   -1.90    3.60
   2  11  -2    6.40    3.50
   2  11  -2   -4.90    5.30
   2  11  -2   11.30    3.70
   2  11  -2    3.70    7.00
   2  11  -2    0.30    2.80
   2  11  -2    8.80    4.30
   2  11  -2    3.00    3.50
   1  11  -2   -3.10    6.20
   1  11  -2    2.80    4.20
   1  11  -2   -0.30    3.00
   1  11  -2    4.20    2.80
   1  11  -2   -8.80    4.60
   1  11  -2    5.40    3.30
   1  11  -2    0.20    3.20
   0  11  -2  223.98   11.50
   0  11  -2  221.58   11.80
   0  11  -2  237.18   17.70
   0  11  -2  218.88   13.70
   0  11  -2  221.18   11.30
   0  11  -2  228.38   15.30
   0  11  -2  242.98   14.80
   0  11  -2  223.88   11.70
  -1  11  -2   52.59    6.40
  -1  11  -2   39.70    4.50
  -1  11  -2   50.19    4.40
  -1  11  -2   22.70    8.10
  -1  11  -2   33.00    6.30
  -1  11  -2   45.30    4.60
  -1  11  -2   37.70    4.20
  -2  11  -2   51.29    5.10
  -2  11  -2   47.90    4.90
  -2  11  -2   51.89    4.70
  -2  11  -2   57.59    6.70
  -2  11  -2   46.60    6.50
  -2  11  -2   61.79    6.00
  -3  11  -2   29.30    5.00
  -3  11  -2   20.70    3.90
  -3  11  -2   17.40    4.00
  -3  11  -2   12.00    4.70
  -3  11  -2   18.80    3.80
  -3  11  -2   14.50    4.00
  -4  11  -2   57.29    5.90
  -4  11  -2   56.69    6.10
  -4  11  -2   59.49    5.90
  -4  11  -2   45.90    5.70
  -4  11  -2   64.59    7.80
  -4  11  -2   63.49    6.20
   4 -11   2   53.19    4.30
   4 -11   2   58.69    4.50
  -5  11  -2   43.70    6.20
  -5  11  -2   48.40    6.90
  -5  11  -2   38.30    5.60
  -5  11  -2   47.90    6.10
  -5  11  -2   45.30    4.90
  -5  11  -2   37.10    6.00
   5 -11   2   45.10    4.50
   5 -11   2   41.20    4.10
  -6  11  -2   53.39    7.00
  -6  11  -2   64.39    7.40
  -6  11  -2   53.39    5.30
  -6  11  -2   57.79    7.00
  -6  11  -2   46.70    7.30
  -6  11  -2   44.00    6.70
   6 -11   2   60.59    5.80
   6 -11   2   53.79    5.40
   6 -11   2   58.99    5.70
   6 -11   2   64.79    8.10
  -7  11  -2  182.38   13.30
  -7  11  -2  200.88   13.40
  -7  11  -2  187.18   13.90
  -7  11  -2  203.78   14.20
  -7  11  -2  181.38   15.00
  -7  11  -2  185.48   15.10
   7 -11   2  203.08   11.30
   7 -11   2  219.08   14.80
   7 -11   2  166.18   11.70
  -8  11  -2  156.28   15.20
  -8  11  -2  169.58   13.40
  -8  11  -2  169.98   13.50
  -8  11  -2  154.88   13.00
  -8  11  -2  164.48   13.50
   8 -11   2  139.79   11.30
   8 -11   2  179.78   11.10
  -9  11  -2   24.00    8.10
  -9  11  -2   29.30    7.50
  -9  11  -2   29.30    7.90
   9 -11   2   19.80    5.50
   9 -11   2   28.20    5.40
 -10  11  -2   51.89    9.50
 -10  11  -2   52.19   10.50
 -10  11  -2   54.59    9.50
  10 -11   2   25.00    6.60
 -11  11  -2   10.40    7.90
 -11  11  -2   -4.50    7.30
 -11  11  -2   -0.30    8.20
  11 -11   2    2.70    5.20
 -12  11  -2   22.20   10.40
 -12  11  -2   11.90    8.90
 -12  11  -2   13.90    9.10
  12 -11   2   18.60    7.00
 -13  11  -2   14.80   10.00
 -13  11  -2    9.90    9.00
 -13  11  -2   -9.70    9.30
  13 -11   2    5.70    7.80
   9  10  -2    5.60   10.20
   9  10  -2    7.40    7.80
   9  10  -2   11.90    7.90
   9  10  -2    6.30    9.90
   8  10  -2   33.90   10.80
   8  10  -2   47.00    8.80
   8  10  -2   50.89   11.90
   8  10  -2   38.30    8.20
   7  10  -2   13.10    8.50
   7  10  -2   11.90    8.80
   7  10  -2   -1.90    8.40
   7  10  -2    8.80    6.30
   7  10  -2    8.60    5.90
   6  10  -2   26.30    6.50
   6  10  -2   22.20   10.20
   6  10  -2   13.40    8.10
   6  10  -2   27.10    6.70
   6  10  -2   26.60    8.70
   6  10  -2   24.20    6.30
   6  10  -2   39.70    8.40
   5  10  -2    3.60    4.90
   5  10  -2    0.90    3.20
   5  10  -2    0.00    7.60
   5  10  -2    4.20    4.70
   5  10  -2   -0.80    4.70
   5  10  -2    8.20    7.60
   5  10  -2   -4.00    8.20
  -5 -10   2    8.10    6.60
  -5 -10   2    6.40    2.80
  -5 -10   2    4.90    3.00
   4  10  -2   -5.50    3.00
   4  10  -2    4.90    7.00
   4  10  -2   -3.30    4.10
   4  10  -2    9.10    4.40
   4  10  -2    3.30    6.90
   4  10  -2    4.30    4.30
   4  10  -2   10.00    4.20
   4  10  -2    0.80    7.70
  -4 -10   2    2.60    2.00
  -4 -10   2    4.00    5.80
  -4 -10   2    0.60    2.00
   3  10  -2  210.48   12.40
   3  10  -2  217.58   17.90
   3  10  -2  217.78   12.50
   3  10  -2  222.58   12.00
   3  10  -2  228.18   16.50
   3  10  -2  210.38   12.70
   3  10  -2  199.68   16.40
   3  10  -2  227.98   13.00
   2  10  -2    5.00    3.90
   2  10  -2   -0.30    2.80
   2  10  -2    4.50    3.40
   2  10  -2   -0.80    2.90
   2  10  -2    1.50    5.50
   2  10  -2   -1.20    5.70
   1  10  -2   15.10    6.60
   1  10  -2   14.70    5.70
   1  10  -2   16.90    3.30
   1  10  -2   13.70    3.20
   1  10  -2    8.60    4.10
   1  10  -2   18.80    3.10
   1  10  -2   17.20    3.50
   0  10  -2   40.60    3.80
   0  10  -2   40.30    6.50
   0  10  -2   35.30    3.90
   0  10  -2   36.20    3.90
   0  10  -2   42.80    5.70
   0  10  -2   39.30    6.00
   0  10  -2   38.10    3.80
   0  10  -2   50.59    8.70
  -1  10  -2   13.20    3.00
  -1  10  -2   17.00    3.00
  -1  10  -2   16.40    2.80
  -1  10  -2   11.10    2.80
  -1  10  -2   22.10    7.50
  -1  10  -2   16.90    4.80
  -1  10  -2   17.80    4.90
  -2  10  -2   26.90    3.60
  -2  10  -2   30.80    5.20
  -2  10  -2   24.60    5.00
  -2  10  -2   19.60    3.50
  -2  10  -2   18.60    3.20
  -2  10  -2   26.60    3.70
  -3  10  -2   12.10    3.40
  -3  10  -2   10.60    4.50
  -3  10  -2   14.20    3.50
  -3  10  -2   13.30    4.10
  -3  10  -2    8.30    3.50
  -3  10  -2   17.30    3.80
  -4  10  -2   54.79    6.60
  -4  10  -2   54.99    5.50
  -4  10  -2   48.90    5.70
  -4  10  -2   46.80    5.20
  -4  10  -2   47.50    5.30
  -4  10  -2   40.40    5.40
   4 -10   2   47.20    4.60
   4 -10   2   48.30    4.70
  -5  10  -2    7.80    5.00
  -5  10  -2    1.10    3.90
  -5  10  -2    2.00    4.20
  -5  10  -2    1.20    3.00
  -5  10  -2   -0.80    3.50
  -5  10  -2    4.50    4.10
   5 -10   2    5.80    3.00
   5 -10   2   -1.10    2.60
   5 -10   2    5.70    4.80
   5 -10   2    2.10    3.50
   5 -10   2    2.50    2.30
  -6  10  -2  577.44   27.20
  -6  10  -2  562.04   25.00
  -6  10  -2  588.24   27.20
  -6  10  -2  541.05   27.30
  -6  10  -2  578.74   27.40
  -6  10  -2  556.04   24.90
  -6  10  -2  545.75   28.10
   6 -10   2  555.44   25.50
   6 -10   2  587.24   26.20
   6 -10   2  536.75   25.80
   6 -10   2  593.34   28.30
  -7  10  -2   27.30    2.90
  -7  10  -2   21.30    6.80
  -7  10  -2   29.40    5.80
  -7  10  -2   19.00    6.00
  -7  10  -2   27.00    6.00
  -7  10  -2   23.20    3.10
  -7  10  -2   26.80    6.50
  -7  10  -2   12.20    5.60
   7 -10   2   18.10    4.70
   7 -10   2   22.80    6.30
   7 -10   2   15.80    4.70
   7 -10   2   13.70    4.40
  -8  10  -2   56.09    7.90
  -8  10  -2   45.30    8.70
  -8  10  -2   72.69    9.10
  -8  10  -2   51.19    7.60
  -8  10  -2   46.40    4.40
  -8  10  -2   55.89    7.70
  -8  10  -2   48.10    7.80
   8 -10   2   48.00    6.20
   8 -10   2   41.10    6.40
  -9  10  -2  471.35   27.10
  -9  10  -2  455.25   26.20
  -9  10  -2  496.75   21.40
  -9  10  -2  504.85   26.00
  -9  10  -2  482.45   26.10
  -9  10  -2  535.55   26.70
  -9  10  -2  478.95   26.20
   9 -10   2  449.06   24.80
   9 -10   2  490.85   24.30
 -10  10  -2  308.77   18.80
 -10  10  -2  272.67   19.00
 -10  10  -2  272.77   21.10
 -10  10  -2  265.17   19.50
 -10  10  -2  273.97   15.80
  10 -10   2  259.17   17.50
  10 -10   2  320.87   17.70
 -11  10  -2   -7.10    6.70
 -11  10  -2   -2.10    7.00
 -11  10  -2   -9.30    7.30
  11 -10   2    7.20    6.20
 -12  10  -2   27.10    9.60
 -12  10  -2   15.50    8.40
 -12  10  -2   20.70    9.80
  12 -10   2    0.10    6.60
 -13  10  -2   -4.80    8.10
 -13  10  -2  -15.30    8.70
 -13  10  -2    3.20    9.30
  13 -10   2    2.40    7.60
 -14  10  -2   29.70   10.40
 -14  10  -2   12.70   11.20
 -14  10  -2   19.90   10.00
  14 -10   2   41.90   10.20
  10   9  -2    1.80    7.70
  10   9  -2   31.70   10.30
  10   9  -2    6.60   10.90
  10   9  -2   13.10    7.90
   9   9  -2   -4.60    8.50
   9   9  -2   -0.90    9.30
   9   9  -2   12.70    7.80
   9   9  -2   -3.90    6.70
   8   9  -2   42.20    7.90
   8   9  -2   38.80   11.00
   8   9  -2   38.60   10.00
   8   9  -2   26.00    7.30
   8   9  -2   47.10   10.10
   7   9  -2   23.50    9.30
   7   9  -2   16.70    6.30
   7   9  -2   22.00    4.10
   7   9  -2   12.00    6.50
   7   9  -2   36.10   10.30
   7   9  -2   26.50    7.00
   7   9  -2   35.40    9.20
  -7  -9   2   25.20    4.10
  -7  -9   2   19.10    4.60
   6   9  -2  206.48   13.70
   6   9  -2  175.88   14.30
   6   9  -2  202.98   16.60
   6   9  -2  188.08   13.90
   6   9  -2  217.18   13.90
   6   9  -2  182.98   16.80
   6   9  -2  168.28   13.20
   6   9  -2  182.68   11.20
   6   9  -2  170.38   17.30
  -6  -9   2  183.58   11.20
  -6  -9   2  204.88   11.60
  -6  -9   2  204.98   10.10
   5   9  -2    6.00    7.30
   5   9  -2    9.00    4.80
   5   9  -2    2.40    3.30
   5   9  -2   12.90    8.10
   5   9  -2    1.90    6.70
   5   9  -2    7.50    4.90
   5   9  -2    0.00    4.30
   5   9  -2   10.10    4.70
  -5  -9   2    7.80    2.40
  -5  -9   2    8.90    6.80
  -5  -9   2    2.10    3.10
   4   9  -2  267.27   15.40
   4   9  -2  269.07   15.50
   4   9  -2  301.77   15.00
   4   9  -2  269.77   19.20
   4   9  -2  273.77   14.80
   4   9  -2  287.97   18.60
   4   9  -2  291.77   15.20
   4   9  -2  281.67   19.70
  -4  -9   2  273.27   13.20
  -4  -9   2  300.17   13.40
  -4  -9   2  270.87   18.40
   3   9  -2   56.79    5.70
   3   9  -2   67.59    6.40
   3   9  -2   75.99    9.60
   3   9  -2   56.09    5.90
   3   9  -2   48.10    8.60
   3   9  -2   73.49    9.20
   3   9  -2   58.39    6.00
   3   9  -2   59.79    5.80
  -3  -9   2   67.79    8.80
  -3  -9   2   56.89    3.80
   2   9  -2  104.79    7.70
   2   9  -2  134.99    9.20
   2   9  -2  117.39   11.60
   2   9  -2  111.99    7.20
   2   9  -2  101.69   11.30
   2   9  -2  119.59    7.80
   1   9  -2    7.80    2.70
   1   9  -2   -1.70    2.40
   1   9  -2    4.20    2.20
   1   9  -2    8.90    5.60
   1   9  -2    1.80    3.70
   1   9  -2   -2.20    4.40
   1   9  -2   -0.70    2.40
   0   9  -2  945.91   39.80
   0   9  -2  936.11   39.80
   0   9  -2  899.21   39.60
   0   9  -2  934.61   41.70
   0   9  -2  889.51   43.20
   0   9  -2  969.10   42.80
   0   9  -2  942.31   39.60
  -1   9  -2  128.39    9.20
  -1   9  -2  114.59    6.80
  -1   9  -2  121.19    6.70
  -1   9  -2  110.99    6.90
  -1   9  -2  118.49    9.60
  -1   9  -2  117.29    6.90
  -2   9  -2  117.59    9.10
  -2   9  -2  111.89    7.00
  -2   9  -2  107.99    7.20
  -2   9  -2  122.19    9.00
  -2   9  -2  126.19    7.20
  -2   9  -2  115.89    7.30
  -3   9  -2   27.80    4.00
  -3   9  -2   24.40    4.00
  -3   9  -2   34.30    5.30
  -3   9  -2   27.90    4.50
  -3   9  -2   29.20    4.10
  -3   9  -2   28.90    4.10
   3  -9   2   28.50    2.70
   3  -9   2   30.90    2.80
  -4   9  -2   36.20    4.70
  -4   9  -2   33.40    4.80
  -4   9  -2   29.30    4.10
  -4   9  -2   28.30    4.40
  -4   9  -2   26.80    4.60
  -4   9  -2   28.70    5.40
   4  -9   2   34.10    2.90
   4  -9   2   30.00    2.70
   4  -9   2   36.10    3.60
  -5   9  -2   83.99    8.30
  -5   9  -2   66.89    6.10
  -5   9  -2   69.09    6.80
  -5   9  -2   62.49    6.70
  -5   9  -2   85.09    8.50
  -5   9  -2   79.79    7.30
   5  -9   2   74.19    6.50
   5  -9   2   84.19    6.10
   5  -9   2   78.89    6.00
   5  -9   2   80.39    8.00
   5  -9   2   78.39    6.60
  -6   9  -2   28.70    5.60
  -6   9  -2   33.30    5.50
  -6   9  -2   26.80    6.10
  -6   9  -2   25.10    3.20
  -6   9  -2   21.80    5.20
  -6   9  -2   31.10    5.60
   6  -9   2   25.40    6.30
   6  -9   2   23.00    4.20
   6  -9   2   32.00    5.10
   6  -9   2   22.70    4.50
   6  -9   2   24.50    4.50
  -7   9  -2  378.76   20.50
  -7   9  -2  367.46   21.10
  -7   9  -2  365.96   19.80
  -7   9  -2  394.26   20.30
  -7   9  -2  391.46   20.10
  -7   9  -2  375.76   17.20
  -7   9  -2  360.66   20.20
   7  -9   2  336.87   18.90
   7  -9   2  399.56   19.20
   7  -9   2  370.06   20.70
   7  -9   2  364.66   18.70
  -8   9  -2  230.08   15.00
  -8   9  -2  188.38   15.80
  -8   9  -2  266.67   15.90
  -8   9  -2  232.88   16.00
  -8   9  -2  208.78   15.60
  -8   9  -2  237.68   11.70
  -8   9  -2  250.97   16.00
   8  -9   2  220.98   14.40
   8  -9   2  224.88   14.00
  -9   9  -2   68.99    9.30
  -9   9  -2   76.89    6.50
  -9   9  -2   85.49    9.40
  -9   9  -2   78.89    9.40
  -9   9  -2   50.99    9.00
  -9   9  -2   69.39    9.00
  -9   9  -2   82.19    9.90
   9  -9   2   87.79    9.10
   9  -9   2   69.69    7.80
 -10   9  -2  681.03   33.90
 -10   9  -2  692.23   34.60
 -10   9  -2  702.23   33.80
 -10   9  -2  649.74   34.20
 -10   9  -2  627.34   35.00
 -10   9  -2  677.13   30.40
 -10   9  -2  652.43   34.00
  10  -9   2  738.63   33.60
  10  -9   2  641.24   33.00
 -11   9  -2    3.20    7.70
 -11   9  -2    2.70    5.30
 -11   9  -2   -2.40    6.40
 -11   9  -2   12.20    6.70
 -11   9  -2   -1.60    7.00
  11  -9   2    2.40    6.70
  11  -9   2   11.50    6.20
 -12   9  -2   62.29   11.30
 -12   9  -2   70.39   11.70
 -12   9  -2   71.99   11.40
  12  -9   2   69.59   10.40
 -13   9  -2   -3.90    8.80
 -13   9  -2   16.10    9.60
 -13   9  -2   13.00    9.50
  13  -9   2   -5.40    7.50
 -14   9  -2   -3.40    9.10
 -14   9  -2    7.60    9.30
 -14   9  -2    4.20    9.50
  14  -9   2    7.00    8.50
  11   8  -2    5.00   10.50
  11   8  -2    9.60    8.10
  11   8  -2    8.20    9.60
  11   8  -2   13.10    8.50
  10   8  -2    1.70    7.40
  10   8  -2   -1.40    8.10
  10   8  -2   -8.30    6.50
  10   8  -2   -6.10    8.50
   9   8  -2    1.90    9.40
   9   8  -2    2.00    7.00
   9   8  -2    1.50    6.60
   9   8  -2    2.30    7.90
   9   8  -2    2.40    8.80
  -9  -8   2   -2.20    7.60
   8   8  -2   51.29   11.60
   8   8  -2   61.39   10.70
   8   8  -2   51.69    8.20
   8   8  -2   50.89    8.10
   8   8  -2   47.10   11.50
  -8  -8   2   41.50    6.40
  -8  -8   2   41.60    5.90
   7   8  -2  169.48   17.50
   7   8  -2  177.98   13.90
   7   8  -2  166.88   16.30
   7   8  -2  170.68   13.30
   7   8  -2  181.28   15.70
   7   8  -2  187.18   11.20
   7   8  -2  174.28   13.60
   7   8  -2  192.58   13.60
  -7  -8   2  202.18   11.30
  -7  -8   2  176.58   12.00
   6   8  -2  164.18   13.40
   6   8  -2  148.09   10.20
   6   8  -2  183.88   15.00
   6   8  -2  154.68   15.30
   6   8  -2  179.48   16.40
   6   8  -2  162.58   11.80
   6   8  -2  156.88   12.10
   6   8  -2  158.98   12.50
   6   8  -2  176.48   12.20
  -6  -8   2  179.18   10.00
  -6  -8   2  159.68   15.20
  -6  -8   2  162.98   10.10
  -6  -8   2  160.68   10.30
   5   8  -2   73.79    7.30
   5   8  -2   59.49    5.90
   5   8  -2   77.09    7.30
   5   8  -2   54.79    9.50
   5   8  -2   54.19    8.40
   5   8  -2   62.79    9.50
   5   8  -2   68.29    7.40
   5   8  -2   58.89    6.90
  -5  -8   2   75.89    5.80
  -5  -8   2  102.39   10.10
  -5  -8   2   84.29    6.50
  -5  -8   2   78.39    6.50
  -5  -8   2   60.49    9.00
   4   8  -2   -1.70    4.80
   4   8  -2    2.10    6.30
   4   8  -2    0.20    6.00
   4   8  -2    2.00    3.80
   4   8  -2    2.10    3.40
   4   8  -2    3.20    3.00
   4   8  -2   -2.30    3.50
   4   8  -2   -1.50    3.50
  -4  -8   2    2.10    2.40
  -4  -8   2    0.50    1.50
  -4  -8   2    5.30    5.40
  -4  -8   2    2.30    2.70
  -4  -8   2    0.50    1.50
   3   8  -2   37.60    4.40
   3   8  -2   31.90    4.40
   3   8  -2   34.30    4.50
   3   8  -2   33.50    7.60
   3   8  -2   17.90    6.50
   3   8  -2   45.40    7.30
   3   8  -2   41.50    4.80
   3   8  -2   29.80    4.40
  -3  -8   2   32.10    3.20
  -3  -8   2   33.60    6.70
  -3  -8   2   38.60    3.30
   2   8  -2    0.50    3.20
   2   8  -2    1.30    4.80
   2   8  -2   -1.80    2.80
   2   8  -2    1.40    2.70
   2   8  -2    1.40    2.60
   2   8  -2    2.90    2.40
   2   8  -2   -4.60    4.30
   1   8  -2  270.57   13.00
   1   8  -2  271.17   16.00
   1   8  -2  271.97   12.90
   1   8  -2  286.17   13.10
   1   8  -2  287.77   17.00
   1   8  -2  288.57   14.90
   1   8  -2  289.87   13.20
   0   8  -2  196.48   11.80
   0   8  -2  184.18    9.10
   0   8  -2  188.98    9.10
   0   8  -2  190.48    9.00
   0   8  -2  182.68   13.20
   0   8  -2  182.18    9.10
  -1   8  -2   11.90    2.20
  -1   8  -2   11.90    2.40
  -1   8  -2    9.30    2.20
  -1   8  -2    2.50    3.50
  -1   8  -2   15.40    2.40
  -1   8  -2   13.50    3.90
  -2   8  -2  253.87   13.90
  -2   8  -2  251.47   12.00
  -2   8  -2  264.57   13.80
  -2   8  -2  229.28   12.00
  -2   8  -2  259.77   12.30
  -2   8  -2  262.87   12.30
  -3   8  -2   91.59    6.60
  -3   8  -2   85.29    8.10
  -3   8  -2   94.69    7.40
  -3   8  -2   91.09    6.80
  -3   8  -2   85.89    6.90
  -3   8  -2   81.79    6.50
   3  -8   2   85.39    5.50
   3  -8   2   92.19    5.40
  -4   8  -2    5.00    3.40
  -4   8  -2    1.60    3.30
  -4   8  -2    2.60    4.10
  -4   8  -2    3.10    3.50
  -4   8  -2    3.00    3.40
   4  -8   2    7.90    2.60
   4  -8   2    2.90    2.60
   4  -8   2    4.60    2.30
   4  -8   2    2.80    2.70
   4  -8   2    5.10    4.50
  -5   8  -2   27.60    4.80
  -5   8  -2   22.60    4.70
  -5   8  -2   25.00    4.90
  -5   8  -2   23.50    5.40
  -5   8  -2   18.70    4.60
   5  -8   2   22.20    4.20
   5  -8   2   24.60    4.10
   5  -8   2   21.60    5.20
   5  -8   2   29.30    4.00
   5  -8   2   31.50    4.10
  -6   8  -2   -5.60    4.30
  -6   8  -2   -2.50    3.90
  -6   8  -2    8.20    5.20
  -6   8  -2   -6.40    4.00
  -6   8  -2   -2.20    4.00
  -6   8  -2   -2.40    4.00
   6  -8   2    1.50    3.70
   6  -8   2   -3.90    4.80
   6  -8   2   -0.10    3.20
   6  -8   2   -3.70    3.10
   6  -8   2    5.50    3.90
  -7   8  -2  330.77   18.20
  -7   8  -2  342.97   18.70
  -7   8  -2  334.47   15.80
  -7   8  -2  318.37   19.20
  -7   8  -2  317.67   18.10
  -7   8  -2  326.87   18.40
  -7   8  -2  308.17   18.50
   7  -8   2  323.97   17.10
   7  -8   2  358.46   17.40
   7  -8   2  311.87   17.10
   7  -8   2  361.56   19.30
   7  -8   2  320.77   17.50
  -8   8  -2  318.07   17.80
  -8   8  -2  304.97   17.40
  -8   8  -2  270.27   17.00
  -8   8  -2  299.27   14.70
  -8   8  -2  307.37   17.70
  -8   8  -2  292.17   19.30
  -8   8  -2  290.87   17.90
   8  -8   2  277.07   16.70
   8  -8   2  336.77   18.90
   8  -8   2  295.07   16.80
  -9   8  -2  219.28   15.80
  -9   8  -2  247.98   12.90
  -9   8  -2  261.37   15.90
  -9   8  -2  230.98   15.70
  -9   8  -2  219.58   16.80
  -9   8  -2  222.48   16.00
  -9   8  -2  234.28   15.70
   9  -8   2  223.48   15.00
   9  -8   2  238.48   14.60
 -10   8  -2  132.79   12.80
 -10   8  -2  148.59   13.90
 -10   8  -2  146.99   13.20
 -10   8  -2  131.09   12.60
 -10   8  -2  139.39   14.00
 -10   8  -2  154.18   13.30
 -10   8  -2  153.28   10.30
  10  -8   2  133.89   12.40
  10  -8   2  131.39   10.70
 -11   8  -2    5.90    7.40
 -11   8  -2   13.70    4.60
 -11   8  -2   14.10    8.60
 -11   8  -2    7.50    7.30
 -11   8  -2   16.70    8.60
  11  -8   2   10.90    5.80
  11  -8   2    7.70    6.30
 -12   8  -2   47.80   10.70
 -12   8  -2   42.60    9.90
 -12   8  -2   65.99   10.80
  12  -8   2   71.39   10.60
  12  -8   2   57.49   11.30
 -13   8  -2   -1.10    7.30
 -13   8  -2   25.60    8.70
 -13   8  -2   14.30    8.80
  13  -8   2    8.50    8.10
 -14   8  -2   31.40    9.70
 -14   8  -2   -6.00    9.00
 -14   8  -2    1.60    9.20
  14  -8   2   -2.50    8.40
  11   7  -2    0.90    7.80
  11   7  -2   -5.00    8.20
  11   7  -2   11.70   10.10
  11   7  -2   -3.60    7.50
  10   7  -2   46.40    9.30
  10   7  -2   49.60   11.20
  10   7  -2   44.00   10.20
  10   7  -2   36.40   10.50
  10   7  -2   51.29    9.30
 -10  -7   2   45.40    7.40
   9   7  -2   51.79   10.40
   9   7  -2   69.39    9.70
   9   7  -2   64.99   12.20
   9   7  -2   47.40    8.90
   9   7  -2   62.19   10.50
  -9  -7   2   57.59    7.70
  -9  -7   2   56.59    5.90
  -9  -7   2   63.79    8.30
   8   7  -2   -6.50    5.50
   8   7  -2   -3.30    6.50
   8   7  -2    6.80    8.40
   8   7  -2    9.90    6.00
   8   7  -2    5.50    5.90
   8   7  -2    7.50    5.60
   8   7  -2   12.40    7.50
  -8  -7   2   10.10    3.60
  -8  -7   2    3.60    4.50
  -8  -7   2    0.70    4.00
   7   7  -2   64.79   10.60
   7   7  -2   60.79    6.00
   7   7  -2   58.99    9.80
   7   7  -2   57.09    7.90
   7   7  -2   57.69    9.00
   7   7  -2   43.50    7.30
   7   7  -2   57.19    7.90
   7   7  -2   50.99    7.50
   7   7  -2   71.39    8.90
  -7  -7   2   62.59    8.70
  -7  -7   2   42.00    8.40
  -7  -7   2   49.10    5.60
  -7  -7   2   72.19    6.50
  -7  -7   2   64.39    7.20
   6   7  -2   14.30    5.30
   6   7  -2   15.40    8.00
   6   7  -2   11.90    5.20
   6   7  -2    7.90    5.10
   6   7  -2    6.30    4.80
   6   7  -2    8.80    6.90
   6   7  -2   11.30    6.00
   6   7  -2    3.50    3.30
  -6  -7   2   11.90    4.10
  -6  -7   2   12.90    4.30
  -6  -7   2    5.00    3.30
  -6  -7   2    5.80    6.00
  -6  -7   2   18.70    6.30
  -6  -7   2    9.70    3.50
   5   7  -2   27.00    5.50
   5   7  -2   30.30    5.20
   5   7  -2   31.60    5.30
   5   7  -2   43.70    8.00
   5   7  -2   32.40    5.00
   5   7  -2   35.50    6.70
   5   7  -2   18.00    6.80
   5   7  -2   27.70    4.20
  -5  -7   2   26.20    3.80
  -5  -7   2   34.70    4.60
  -5  -7   2   27.00    6.00
  -5  -7   2   33.80    7.20
  -5  -7   2   30.90    4.40
  -5  -7   2   31.70    4.50
   4   7  -2   72.69    7.00
   4   7  -2   47.00    5.50
   4   7  -2   53.29    8.70
   4   7  -2   64.99    6.10
   4   7  -2   53.49    8.40
   4   7  -2   54.09    6.00
   4   7  -2   60.59    6.10
   4   7  -2   60.59    7.40
  -4  -7   2   68.49    4.80
  -4  -7   2   58.09    5.50
  -4  -7   2   61.69    8.20
  -4  -7   2   41.50    4.40
  -4  -7   2   53.79    7.20
  -4  -7   2   70.79    4.80
   3   7  -2  285.27   14.10
   3   7  -2  274.77   14.10
   3   7  -2  265.97   17.50
   3   7  -2  293.37   14.30
   3   7  -2  272.97   14.20
   3   7  -2  265.87   16.00
   3   7  -2  273.87   17.10
   3   7  -2  273.97   13.90
  -3  -7   2  281.87   13.00
  -3  -7   2  275.47   12.90
  -3  -7   2  300.77   17.10
   2   7  -2   73.89    5.80
   2   7  -2   58.99    5.80
   2   7  -2   63.49    5.60
   2   7  -2   63.19    7.50
   2   7  -2   69.89    5.90
   2   7  -2   63.39    5.40
   2   7  -2   61.39    7.20
  -2  -7   2   75.09    3.80
  -2  -7   2   47.90    6.80
  -2  -7   2   68.39    3.80
   1   7  -2  211.78   10.30
   1   7  -2  237.18   10.60
   1   7  -2  216.18   10.30
   1   7  -2  204.68   10.30
   1   7  -2  218.38   12.20
   1   7  -2  221.08   13.90
   1   7  -2  221.38   13.30
   0   7  -2  580.34   24.60
   0   7  -2  570.54   24.60
   0   7  -2  592.84   27.10
   0   7  -2  576.74   24.60
   0   7  -2  593.24   24.60
   0   7  -2  532.75   27.50
  -1   7  -2  609.64   26.30
  -1   7  -2  650.13   26.40
  -1   7  -2  600.64   26.30
  -1   7  -2  616.14   28.30
  -1   7  -2  607.34   26.30
  -1   7  -2  612.04   28.10
  -2   7  -2  226.18   10.60
  -2   7  -2  213.28   12.30
  -2   7  -2  227.38   12.30
  -2   7  -2  213.58   10.60
  -2   7  -2  209.08   10.50
  -2   7  -2  210.68   10.50
   2  -7   2  207.98    9.50
   2  -7   2  210.68    9.40
  -3   7  -2  317.57   15.60
  -3   7  -2  316.97   17.10
  -3   7  -2  324.47   15.70
  -3   7  -2  362.76   16.00
  -3   7  -2  327.87   15.70
   3  -7   2  350.06   15.20
   3  -7   2  335.37   14.60
   3  -7   2  329.97   14.60
   3  -7   2  323.77   17.20
  -4   7  -2   78.79    7.00
  -4   7  -2   81.49    7.40
  -4   7  -2   83.79    7.50
  -4   7  -2   82.19    7.60
  -4   7  -2   90.59    8.40
   4  -7   2   97.39    6.30
   4  -7   2   88.99    6.40
   4  -7   2   79.39    6.50
   4  -7   2   93.19    8.40
   4  -7   2   79.39    5.90
  -5   7  -2    0.90    4.80
  -5   7  -2    3.30    3.60
  -5   7  -2   -6.60    2.20
  -5   7  -2    1.70    3.80
  -5   7  -2    0.80    3.90
  -5   7  -2    5.50    4.00
   5  -7   2   -2.70    2.60
   5  -7   2   -1.70    4.30
   5  -7   2    2.30    3.40
   5  -7   2    2.20    3.10
   5  -7   2    1.20    3.30
  -6   7  -2    6.60    4.60
  -6   7  -2    6.60    5.70
  -6   7  -2    6.60    4.30
  -6   7  -2    8.20    2.70
  -6   7  -2    1.70    4.00
  -6   7  -2   10.60    4.60
  -6   7  -2   -4.70    4.00
   6  -7   2   11.60    3.90
   6  -7   2    2.30    4.00
   6  -7   2    7.10    4.10
   6  -7   2    8.80    3.70
   6  -7   2   18.80    5.70
  -7   7  -2   -3.00    4.80
  -7   7  -2   -2.80    4.30
  -7   7  -2   -1.00    4.80
  -7   7  -2   -1.30    4.50
  -7   7  -2    0.10    5.30
  -7   7  -2   -1.40    2.80
  -7   7  -2   -1.40    4.30
   7  -7   2   -3.80    3.80
   7  -7   2    0.90    4.00
   7  -7   2   -2.20    5.10
   7  -7   2    6.40    4.00
   7  -7   2    0.10    4.10
  -8   7  -2   41.00    6.70
  -8   7  -2   33.50    7.10
  -8   7  -2   34.50    6.50
  -8   7  -2   25.60    6.20
  -8   7  -2   42.70    4.90
  -8   7  -2   27.10    6.60
  -8   7  -2   51.09    6.80
   8  -7   2   28.20    5.90
   8  -7   2   39.90    6.10
   8  -7   2   32.00    5.70
   8  -7   2   56.09    6.90
   8  -7   2   31.80    6.70
  -9   7  -2    1.00    5.80
  -9   7  -2   -1.70    4.90
  -9   7  -2    1.90    3.80
  -9   7  -2    3.80    5.40
  -9   7  -2    1.30    5.30
  -9   7  -2    3.00    6.50
  -9   7  -2   -1.40    5.50
   9  -7   2    4.50    5.40
   9  -7   2   -4.20    1.80
 -10   7  -2   11.00    6.20
 -10   7  -2   26.50    7.40
 -10   7  -2   24.50    5.10
 -10   7  -2   28.60    8.30
 -10   7  -2   26.50    6.80
 -10   7  -2   26.80    7.30
 -10   7  -2   24.50    7.00
  10  -7   2   26.20    7.50
  10  -7   2   28.10    7.00
 -11   7  -2  -10.90    6.60
 -11   7  -2    1.10    4.30
 -11   7  -2    4.60    6.60
 -11   7  -2    1.80    6.30
 -11   7  -2   -9.40    6.10
 -11   7  -2    2.10    7.20
  11  -7   2   -4.00    6.10
  11  -7   2    2.20    6.70
 -12   7  -2   82.29   12.60
 -12   7  -2  102.29   12.10
 -12   7  -2   87.09   11.60
 -12   7  -2  110.09   10.10
  12  -7   2   88.59   12.00
  12  -7   2  141.69   13.70
 -13   7  -2   -4.80    7.10
 -13   7  -2    9.30    8.40
 -13   7  -2    3.80    9.20
  13  -7   2   -2.20    7.80
 -14   7  -2    2.90    9.10
 -14   7  -2   -7.10    8.70
 -14   7  -2   15.20    9.90
  14  -7   2   -6.80    7.10
  12   6  -2   20.10    9.10
  12   6  -2   28.10    9.70
  12   6  -2    4.00    8.20
  12   6  -2   29.10   11.00
  11   6  -2   41.00    9.80
  11   6  -2   20.50    9.80
  11   6  -2   26.50    8.50
  11   6  -2   16.10    8.80
 -11  -6   2   36.10    7.90
  10   6  -2    1.80    7.50
  10   6  -2   -4.20    8.10
  10   6  -2   16.60    8.10
  10   6  -2    2.30    7.50
  10   6  -2    1.80    7.10
 -10  -6   2   -1.90    5.40
 -10  -6   2    5.90    4.30
   9   6  -2   55.59   11.60
   9   6  -2   59.89   11.00
   9   6  -2   57.59    9.00
   9   6  -2   65.19    9.20
   9   6  -2   72.99   10.80
   9   6  -2   59.49    9.30
  -9  -6   2   52.69    7.60
  -9  -6   2   54.19    6.50
  -9  -6   2   77.99    7.90
   8   6  -2  117.59   11.70
   8   6  -2  129.69   11.90
   8   6  -2  106.69   10.50
   8   6  -2   98.69   10.20
   8   6  -2   90.29   11.70
   8   6  -2   91.49   11.80
   8   6  -2  118.69   10.80
  -8  -6   2   98.89    8.80
  -8  -6   2  101.89   10.30
  -8  -6   2  132.59   12.20
  -8  -6   2  113.69    9.70
  -8  -6   2   97.69   11.60
   7   6  -2    6.30    6.70
   7   6  -2    9.10    3.80
   7   6  -2    3.60    7.10
   7   6  -2    7.90    5.30
   7   6  -2   -0.10    5.20
   7   6  -2   -1.80    4.90
   7   6  -2    3.70    5.60
   7   6  -2    3.20    4.80
   7   6  -2    6.10    5.40
  -7  -6   2    5.10    4.90
  -7  -6   2   -0.70    4.20
  -7  -6   2   10.20    5.50
  -7  -6   2   -0.40    5.70
  -7  -6   2   -0.40    4.20
  -7  -6   2    2.50    3.40
   6   6  -2   -2.20    4.30
   6   6  -2   -3.80    5.70
   6   6  -2   -7.00    3.00
   6   6  -2    2.50    4.60
   6   6  -2   -6.00    4.20
   6   6  -2   -3.70    5.40
   6   6  -2    1.10    5.70
   6   6  -2   -0.30    4.40
   6   6  -2    6.80    5.50
  -6  -6   2    0.10    3.00
  -6  -6   2   -5.30    4.40
  -6  -6   2   -1.10    3.60
  -6  -6   2   -1.90    3.40
  -6  -6   2   -1.80    5.30
  -6  -6   2    0.40    3.60
   5   6  -2    1.60    3.00
   5   6  -2   12.20    4.90
   5   6  -2    5.60    4.10
   5   6  -2    5.70    4.00
   5   6  -2    7.50    4.00
   5   6  -2   -1.90    5.60
   5   6  -2   -0.90    4.00
   5   6  -2    4.00    6.10
  -5  -6   2    5.50    3.20
  -5  -6   2    8.50    6.00
  -5  -6   2    1.80    3.00
  -5  -6   2   -5.80    3.20
  -5  -6   2    5.20    3.40
  -5  -6   2    4.00    4.40
  -5  -6   2    2.50    3.30
   4   6  -2   19.50    6.10
   4   6  -2   25.10    4.40
   4   6  -2   24.50    5.60
   4   6  -2   36.10    7.20
   4   6  -2   26.80    4.50
   4   6  -2   20.70    4.40
   4   6  -2   29.40    4.60
   4   6  -2   24.90    3.80
  -4  -6   2   23.30    6.10
  -4  -6   2   23.10    3.20
  -4  -6   2   31.90    3.80
  -4  -6   2   25.60    5.40
  -4  -6   2   23.30    3.90
  -4  -6   2   32.10    3.40
  -4  -6   2   24.80    3.70
   3   6  -2    8.90    3.30
   3   6  -2    4.70    3.10
   3   6  -2    4.60    2.80
   3   6  -2    9.30    5.60
   3   6  -2    6.60    4.90
   3   6  -2   -0.20    3.00
   3   6  -2    8.00    3.20
   3   6  -2    8.40    4.30
  -3  -6   2    7.10    2.00
  -3  -6   2    7.10    2.10
  -3  -6   2   10.60    5.00
  -3  -6   2    2.50    4.20
  -3  -6   2    7.10    2.40
   2   6  -2   24.70    3.40
   2   6  -2   27.90    5.60
   2   6  -2   35.80    5.60
   2   6  -2   29.40    3.40
   2   6  -2   37.20    6.50
   2   6  -2   30.10    4.00
   2   6  -2   33.50    3.50
   2   6  -2   30.20    3.40
  -2  -6   2   34.80    3.20
  -2  -6   2   30.80    2.70
  -2  -6   2   27.50    5.60
   1   6  -2   27.90    5.20
   1   6  -2   32.30    3.30
   1   6  -2   31.20    2.80
   1   6  -2   36.40    4.60
   1   6  -2   30.90    2.70
   1   6  -2   42.80    5.90
   1   6  -2   30.60    2.90
   0   6  -2  230.08   10.10
   0   6  -2  234.18   10.20
   0   6  -2  232.58   10.10
   0   6  -2  227.58   12.80
   0   6  -2  223.08   10.10
  -1   6  -2  228.88   10.60
  -1   6  -2  249.97   10.70
  -1   6  -2  224.88   10.70
  -1   6  -2  233.98   12.60
  -1   6  -2  243.58   10.60
  -1   6  -2  239.48   12.80
  -2   6  -2    5.20    3.60
  -2   6  -2    4.90    2.40
  -2   6  -2    4.40    2.40
  -2   6  -2    2.50    2.40
  -2   6  -2    6.00    2.30
   2  -6   2    2.90    1.70
   2  -6   2    5.80    1.80
  -3   6  -2  102.39    7.20
  -3   6  -2   94.19    7.30
  -3   6  -2  109.09    8.80
  -3   6  -2  101.19    7.30
  -3   6  -2  106.89    7.20
   3  -6   2  122.19    8.70
   3  -6   2  112.09    6.20
   3  -6   2  105.19    6.50
   3  -6   2  110.09    6.70
   3  -6   2  107.89    6.20
  -4   6  -2   40.00    4.90
  -4   6  -2   43.10    4.90
  -4   6  -2   62.09    6.70
  -4   6  -2   44.50    4.90
  -4   6  -2   44.70    5.10
   4  -6   2   44.60    4.20
   4  -6   2   51.69    4.70
   4  -6   2   53.29    4.90
   4  -6   2   42.20    5.70
   4  -6   2   44.70    4.60
  -5   6  -2   47.80    5.00
  -5   6  -2   42.90    5.80
  -5   6  -2   45.20    5.50
  -5   6  -2   51.39    5.70
  -5   6  -2   41.60    5.50
  -5   6  -2   44.90    6.40
  -5   6  -2   43.20    5.60
   5  -6   2   46.20    5.10
   5  -6   2   48.40    5.00
   5  -6   2   40.50    5.40
   5  -6   2   51.09    6.60
   5  -6   2   42.10    5.00
  -6   6  -2    7.60    4.40
  -6   6  -2    9.50    4.80
  -6   6  -2   16.20    5.90
  -6   6  -2   16.60    5.30
  -6   6  -2   20.80    3.50
  -6   6  -2   20.90    4.60
  -6   6  -2   15.60    4.90
   6  -6   2   14.30    4.00
   6  -6   2   18.00    4.40
   6  -6   2   18.00    4.60
   6  -6   2   34.60    5.90
   6  -6   2   12.50    4.50
  -7   6  -2    5.60    4.80
  -7   6  -2    4.00    4.70
  -7   6  -2   -6.20    4.10
  -7   6  -2   -0.30    5.30
  -7   6  -2    2.00    4.20
  -7   6  -2    5.50    4.30
  -7   6  -2    5.50    3.20
   7  -6   2    5.50    3.70
   7  -6   2   -0.80    4.40
   7  -6   2    5.70    4.70
   7  -6   2    1.40    4.10
   7  -6   2    9.40    3.80
  -8   6  -2    3.00    4.60
  -8   6  -2   -3.10    5.00
  -8   6  -2    8.90    5.30
  -8   6  -2    1.00    5.50
  -8   6  -2    9.30    3.60
  -8   6  -2   -6.50    3.90
  -8   6  -2   -5.80    5.50
   8  -6   2    3.50    4.40
   8  -6   2    5.30    4.80
   8  -6   2   -5.70    4.20
   8  -6   2   -1.20    4.80
   8  -6   2   -5.00    4.00
  -9   6  -2   19.50    5.70
  -9   6  -2   14.70    4.60
  -9   6  -2   13.90    6.00
  -9   6  -2   10.00    5.60
  -9   6  -2    8.20    6.10
  -9   6  -2    6.00    6.90
  -9   6  -2   11.60    6.10
   9  -6   2   13.90    5.90
   9  -6   2   17.20    6.00
   9  -6   2   20.20    6.10
 -10   6  -2  127.49   11.90
 -10   6  -2  105.49    9.90
 -10   6  -2   98.99   10.60
 -10   6  -2  128.29   12.50
 -10   6  -2   88.99   11.00
 -10   6  -2  110.29   10.90
 -10   6  -2   94.89   10.30
  10  -6   2  111.49   11.10
  10  -6   2  105.69   10.90
 -11   6  -2   29.30    6.20
 -11   6  -2   40.90    8.80
 -11   6  -2   12.20    7.90
 -11   6  -2   31.20    7.80
 -11   6  -2   39.40    7.40
 -11   6  -2   43.60    9.20
  11  -6   2   28.90    7.30
  11  -6   2   40.80    6.90
  11  -6   2   56.39    9.00
 -12   6  -2   11.10    5.70
 -12   6  -2   16.60    8.70
 -12   6  -2   23.60    8.20
 -12   6  -2   13.80    8.20
  12  -6   2   38.30    9.10
  12  -6   2    8.50    7.10
  12  -6   2   19.00    7.30
 -13   6  -2   13.20    9.20
 -13   6  -2   -2.50    5.50
 -13   6  -2   -5.40    7.50
 -13   6  -2    5.60    7.70
  13  -6   2    4.40    6.70
  13  -6   2   -5.30    6.90
  13  -6   2    3.50    7.10
 -14   6  -2   25.20   10.60
 -14   6  -2   19.00    9.80
 -14   6  -2   35.50   10.10
  14  -6   2   24.60    8.50
  14  -6   2   21.90    9.40
 -15   6  -2    8.40    9.30
 -15   6  -2   -3.50    9.60
 -15   6  -2  -10.50    8.10
  15  -6   2    2.20    9.50
  15  -6   2   -8.30    7.30
  12   5  -2   -9.60    8.10
  12   5  -2   -9.40    7.00
  12   5  -2   12.20   10.40
  12   5  -2   10.10    8.80
 -12  -5   2  -10.30    6.20
  11   5  -2   21.10    7.80
  11   5  -2    5.90    8.90
  11   5  -2    3.70    7.70
  11   5  -2   13.40    7.60
  11   5  -2   13.70    9.60
 -11  -5   2    3.60    4.80
 -11  -5   2    6.20    6.30
  10   5  -2   11.30    7.90
  10   5  -2   15.30    7.60
  10   5  -2   22.70    7.80
  10   5  -2   18.40    7.90
  10   5  -2   19.30    7.40
  10   5  -2   16.10    8.30
 -10  -5   2   20.00    6.00
 -10  -5   2   12.50    4.90
 -10  -5   2   13.10    6.30
   9   5  -2   42.60    7.70
   9   5  -2   23.90    8.30
   9   5  -2   28.70    7.40
   9   5  -2   37.80    8.20
   9   5  -2   41.20    7.80
   9   5  -2   33.90    8.90
   9   5  -2   29.50    6.90
  -9  -5   2   33.50    6.50
  -9  -5   2   37.00    8.80
  -9  -5   2   29.80    5.30
  -9  -5   2   38.20    6.90
  -9  -5   2   24.10    8.20
   8   5  -2   -3.20    5.60
   8   5  -2    7.50    6.20
   8   5  -2   -2.80    6.40
   8   5  -2    4.10    5.70
   8   5  -2    0.00    5.70
   8   5  -2    2.60    5.50
   8   5  -2    6.00    7.20
  -8  -5   2    0.80    4.70
  -8  -5   2   -3.30    3.30
  -8  -5   2    5.30    6.30
  -8  -5   2    3.60    5.10
  -8  -5   2    4.50    4.60
   7   5  -2   -2.70    6.20
   7   5  -2   -2.20    5.60
   7   5  -2    5.10    5.00
   7   5  -2   16.90    4.20
   7   5  -2    0.80    4.70
   7   5  -2    7.80    5.30
   7   5  -2   10.00    5.70
   7   5  -2  -11.40    4.50
   7   5  -2    7.50    6.70
  -7  -5   2   10.00    4.40
  -7  -5   2    0.00    5.50
  -7  -5   2    9.60    5.20
  -7  -5   2    1.40    4.10
  -7  -5   2    3.50    4.20
  -7  -5   2    1.50    3.30
   6   5  -2    5.60    6.20
   6   5  -2   13.90    4.70
   6   5  -2    8.70    3.50
   6   5  -2   12.10    6.40
   6   5  -2    4.80    4.70
   6   5  -2    8.40    5.00
   6   5  -2   20.40    5.70
   6   5  -2   14.70    5.00
   6   5  -2   19.90    5.30
  -6  -5   2   12.00    4.20
  -6  -5   2   13.90    5.20
  -6  -5   2   13.10    4.10
  -6  -5   2    8.10    5.40
  -6  -5   2   11.40    3.60
  -6  -5   2   12.20    4.20
  -6  -5   2   16.60    4.00
   5   5  -2  130.09    9.10
   5   5  -2  117.89    9.40
   5   5  -2  116.99    8.10
   5   5  -2  111.39    8.80
   5   5  -2  112.29   10.80
   5   5  -2  107.59   10.70
   5   5  -2  105.49    9.10
   5   5  -2  100.49    9.20
  -5  -5   2  102.09    8.30
  -5  -5   2  119.49    8.30
  -5  -5   2  105.49   10.30
  -5  -5   2  117.79    9.90
  -5  -5   2  100.59    7.80
  -5  -5   2  103.99    8.00
  -5  -5   2  120.79    8.20
   4   5  -2  323.77   18.80
   4   5  -2  332.87   16.10
   4   5  -2  336.97   16.30
   4   5  -2  320.27   16.50
   4   5  -2  323.57   16.30
   4   5  -2  329.07   16.10
   4   5  -2  292.37   18.00
   4   5  -2  313.57   17.20
  -4  -5   2  332.07   15.70
  -4  -5   2  344.37   15.70
  -4  -5   2  337.67   17.30
  -4  -5   2  299.77   18.40
  -4  -5   2  336.17   15.40
  -4  -5   2  307.27   15.70
  -4  -5   2  339.87   15.50
   3   5  -2  907.61   41.50
   3   5  -2  951.70   43.80
   3   5  -2  981.10   41.50
   3   5  -2  967.50   43.80
   3   5  -2  945.01   41.60
   3   5  -2  980.20   41.50
   3   5  -2  973.70   42.60
   3   5  -2  956.70   41.50
  -3  -5   2  994.00   41.10
  -3  -5   2  978.80   41.10
  -3  -5   2  953.50   40.70
  -3  -5   2  933.61   43.60
  -3  -5   2  919.31   41.60
  -3  -5   2  964.60   42.50
  -3  -5   2 1017.50   40.80
   2   5  -2  298.87   14.60
   2   5  -2  321.27   14.60
   2   5  -2  340.87   15.50
   2   5  -2  315.57   17.40
   2   5  -2  307.97   14.60
   2   5  -2  318.67   14.70
   2   5  -2  320.27   16.30
   2   5  -2  321.57   17.30
  -2  -5   2  316.97   14.10
  -2  -5   2  324.77   14.10
  -2  -5   2  313.97   17.10
   1   5  -2    0.70    1.80
   1   5  -2   -0.40    3.80
   1   5  -2    0.70    1.70
   1   5  -2    2.90    1.70
   1   5  -2    0.90    1.60
   1   5  -2    3.10    2.90
   1   5  -2   -1.70    3.60
   0   5  -2  111.49    8.40
   0   5  -2  121.39    5.40
  -1   5  -2  389.56   16.70
  -1   5  -2  408.16   16.60
  -1   5  -2  380.76   16.70
  -1   5  -2  399.76   18.70
  -1   5  -2  369.36   16.60
  -2   5  -2   62.99    5.10
  -2   5  -2   74.19    5.20
  -2   5  -2   70.39    5.30
  -2   5  -2   80.19    5.30
  -2   5  -2   72.39    7.20
   2  -5   2   78.79    7.20
   2  -5   2   80.09    4.10
   2  -5   2   72.19    4.10
   2  -5   2   71.99    4.70
   2  -5   2   72.19    4.30
  -3   5  -2    2.70    2.90
  -3   5  -2   -1.60    2.90
  -3   5  -2   -3.20    3.00
  -3   5  -2   -4.30    3.00
  -3   5  -2    1.70    4.00
   3  -5   2    2.60    2.40
   3  -5   2    1.30    3.90
   3  -5   2    1.80    2.60
   3  -5   2    1.60    2.60
   3  -5   2    1.10    3.00
  -4   5  -2    3.10    3.50
  -4   5  -2   -0.30    4.10
  -4   5  -2   -3.80    2.80
  -4   5  -2   -0.10    3.40
  -4   5  -2   -2.00    3.50
  -4   5  -2   -3.70    3.30
   4  -5   2    0.40    3.20
   4  -5   2    0.20    3.10
   4  -5   2    0.80    3.20
   4  -5   2    2.20    2.80
   4  -5   2    1.00    4.40
  -5   5  -2   71.19    7.50
  -5   5  -2   63.89    6.50
  -5   5  -2   60.59    6.00
  -5   5  -2   69.29    6.30
  -5   5  -2   52.59    6.00
  -5   5  -2   52.09    6.20
  -5   5  -2   52.69    5.80
   5  -5   2   65.69    5.90
   5  -5   2   58.79    6.80
   5  -5   2   67.79    6.30
   5  -5   2   72.79    6.70
   5  -5   2   62.39    5.80
  -6   5  -2   -1.70    4.10
  -6   5  -2    1.20    4.00
  -6   5  -2    5.40    4.70
  -6   5  -2   -0.10    3.50
  -6   5  -2   -5.60    4.00
  -6   5  -2   -2.70    3.00
  -6   5  -2    1.10    4.60
   6  -5   2    2.30    4.00
   6  -5   2   -1.30    4.10
   6  -5   2   -0.80    3.30
   6  -5   2    2.70    1.60
   6  -5   2    3.90    4.80
  -7   5  -2   14.70    4.60
  -7   5  -2   17.80    4.90
  -7   5  -2   20.40    6.00
  -7   5  -2   17.10    5.40
  -7   5  -2   12.60    4.70
  -7   5  -2   14.80    4.90
  -7   5  -2   21.40    4.20
   7  -5   2    9.90    4.90
   7  -5   2   10.30    4.30
   7  -5   2   22.20    5.00
   7  -5   2   17.20    5.60
   7  -5   2   15.90    4.70
  -8   5  -2   47.90    7.10
  -8   5  -2   45.60    7.20
  -8   5  -2   38.50    6.20
  -8   5  -2   34.40    7.20
  -8   5  -2   49.00    5.70
  -8   5  -2   48.70    7.50
  -8   5  -2   37.60    6.70
   8  -5   2   51.99    6.30
   8  -5   2   43.70    7.40
   8  -5   2   54.99    7.30
   8  -5   2   39.70    6.40
   8  -5   2   53.59    7.00
   8  -5   2   49.99    7.00
  -9   5  -2   68.39    9.10
  -9   5  -2   46.90    7.50
  -9   5  -2   57.89    9.30
  -9   5  -2   67.69    8.70
  -9   5  -2   57.19    7.50
  -9   5  -2   64.69    9.80
  -9   5  -2   61.99    7.10
  -9   5  -2   55.69    8.00
   9  -5   2   48.80    7.60
   9  -5   2   56.89    7.60
   9  -5   2   59.49    8.20
   9  -5   2   65.89    7.70
   9  -5   2   78.39    7.40
 -10   5  -2    7.90    5.20
 -10   5  -2    6.70    6.40
 -10   5  -2    6.00    5.90
 -10   5  -2   12.20    6.00
 -10   5  -2    6.90    5.00
 -10   5  -2    0.20    5.60
 -10   5  -2   -0.50    6.10
  10  -5   2    0.80    4.80
  10  -5   2    9.40    5.80
  10  -5   2   16.00    5.90
  10  -5   2    2.10    5.90
  10  -5   2    8.20    5.70
 -11   5  -2   31.30    7.40
 -11   5  -2   49.30    7.40
 -11   5  -2   27.80    8.00
 -11   5  -2   36.60    9.40
 -11   5  -2   40.90    8.20
 -11   5  -2   53.09    8.90
  11  -5   2   35.90    6.80
  11  -5   2   34.10    7.30
  11  -5   2   34.90    7.20
  11  -5   2   47.80    8.80
 -12   5  -2    3.80    6.70
 -12   5  -2    0.90    5.30
 -12   5  -2   18.90    9.70
 -12   5  -2   -1.60    7.90
 -12   5  -2   -4.10    6.30
  12  -5   2    3.20    7.40
  12  -5   2   11.40    7.40
  12  -5   2    7.60    6.70
  12  -5   2   14.50    6.20
 -13   5  -2  127.89   14.70
 -13   5  -2  122.29   13.20
 -13   5  -2  119.79   15.50
 -13   5  -2  119.79   13.20
  13  -5   2  171.48   14.80
  13  -5   2  133.79   14.20
  13  -5   2  104.39   12.30
  13  -5   2  123.19   13.40
 -14   5  -2  -12.70    8.80
 -14   5  -2    6.90    6.20
 -14   5  -2    3.30    8.50
 -14   5  -2   -9.80    8.30
  14  -5   2   11.20    7.70
  14  -5   2    5.70    8.90
  14  -5   2   10.20    7.00
 -15   5  -2   -2.80    9.50
 -15   5  -2   17.80   10.00
 -15   5  -2    5.30    9.70
  15  -5   2    3.90    8.70
  15  -5   2    7.20    8.30
  15  -5   2   -4.30    7.10
  13   4  -2   10.30   10.60
  13   4  -2    5.90   10.20
  13   4  -2   11.70    8.80
 -13  -4   2    1.60    7.40
  12   4  -2   -9.80    6.70
  12   4  -2   -0.20    8.30
  12   4  -2    2.50    8.50
  12   4  -2    5.20   10.20
 -12  -4   2   -0.40    5.00
 -12  -4   2   -0.80    6.70
  11   4  -2  131.89   14.90
  11   4  -2   90.59   11.80
  11   4  -2   95.89   11.70
  11   4  -2   94.99   11.50
  11   4  -2   95.89   12.90
 -11  -4   2   95.19   11.00
 -11  -4   2   97.89    9.70
  10   4  -2   61.89    9.10
  10   4  -2   76.69   14.00
  10   4  -2   58.39    9.20
  10   4  -2   62.69   10.40
[truncated: 8,211,640 more chars]
